# Supplementary material for: Direct trifluoromethylselenolations of electron-rich (hetero)aromatic rings with N-trifluoromethylselenolating saccharin
Source: Royal Society of Chemistry journal article supplement (doi:10.1039/d4ob01134a), 2024-01-01
Supplement: d4ob01134a1.pdf [file d4ob01134a1.pdf]

## Electronic Supplementary Information

### Direct Trifluoromethylselenolations of electron-rich aromatic(hetero) rings with N-trifluoromethylselenolating saccharin

Guiya Gao<sup>‡</sup>, Keyi Xie<sup>‡</sup>, Minghui Shi, Tao Gao, Zedong Wang, Congcong Zhang,\* and Zhentao Wang\*

College of Chemistry and Material Science, Shandong Agricultural University, Tai'an, Shandong 271018, P. R. China;

E-mail: [cczhang@sdau.edu.cn](mailto:cczhang@sdau.edu.cn) (C. Zhang), [wzht423@mail.ustc.edu.cn](mailto:wzht423@mail.ustc.edu.cn) (Z. Wang)

<sup>‡</sup> Co-first authors

\* Corresponding authors

### Table of Contents

|                                                                                     |      |
|-------------------------------------------------------------------------------------|------|
| 1) General .....                                                                    | S2   |
| 2) General Procedure for Synthesis of N-trifluoromethylselenolating saccharin ..... | S2   |
| 3) General Procedure for Preparation of <b>4a</b> , <b>4b</b> , <b>4c</b> .....     | S3   |
| 4) General Procedure for Synthesis of <b>5a</b> , <b>5b</b> , <b>5c</b> .....       | S6   |
| 5) The spectral data of N-trifluoromethylselenolating saccharin .....               | S6   |
| 6) The spectral data of <b>4a</b> , <b>4b</b> , <b>4c</b> .....                     | S7   |
| 7) The spectral data of <b>5a</b> , <b>5b</b> , <b>5c</b> .....                     | S9   |
| 8) References .....                                                                 | S31  |
| 9) <sup>1</sup> H, <sup>19</sup> F & <sup>13</sup> C spectra .....                  | S33  |
| 10) X-Ray Crystal data for complexes .....                                          | S133 |

## 1) General

All reactions are performed in an air atmosphere unless otherwise stated. 400 MHz (for  $^1\text{H}$ ) or 500 MHz (for  $^1\text{H}$ ), 376 MHz (for  $^{19}\text{F}$ ) or 471 MHz (for  $^{19}\text{F}$ ), 101 MHz (for  $^{13}\text{C}$ ) or 126 MHz (for  $^{13}\text{C}$ ) spectrometer was recorded in Chloroform-*d* or DMSO-*d*<sub>6</sub>. All chemical shifts were measured in ppm relative to TMS (0 ppm for  $^1\text{H}$  NMR) as internal or external standard. The coupling constant is expressed in Hertz (Hz). We use the following abbreviations to explain multiplicity: s = singlet, d = two-state, t = triplet, q = four-state, m = multiplicity. The reaction was monitored by thin layer chromatography. Unless otherwise stated, yield refers to a substance purified by column chromatography using 200-300 mesh silica gel (Shanxi, China). Mass spectrometry experiments were performed on ESI instruments. Other reagents in the reaction were purchased from commercial sources and used without further purification.

## 2) General Procedure for Synthesis of N-trifluoromethylselenolating saccharin

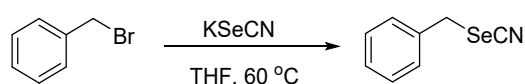

Potassium selenocyanate (12.60 g, 86.90 mmol, 1.1 equiv.), anhydrous tetrahydrofuran (60 mL) and benzyl bromide (9.47 mL, 79.53 mmol, 1.0 equiv.) were added to a dried round-bottom flask at 60 °C for 17 h. After the reaction was monitored by TLC, it was extracted 3 times with ether, and the organic layer was dried over anhydrous sodium sulfate, filtered, and concentrated to dryness to obtain a white solid with a yield of 95%. Without further purification, the product is directly used in the next reaction.<sup>[1]</sup>

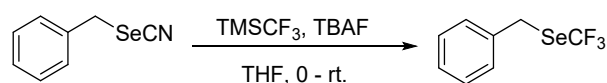

BnSeCN (12.00 g, 61.2 mmol, 1.0 equiv.) was added to a dried two-neck flask, vacuumed, filled with argon, and anhydrous tetrahydrofuran (123 mL) and TMSCF<sub>3</sub> (17.96 mL, 122.4 mmol, 2.0 equiv.) were added. The mixture was cooled to 0 °C, and 1 M TBAF (3.86 g, dissolved in 12.4 mL THF) was dropped to react for 10 min. The mixture was raised to room temperature for 7 h. After TLC monitoring reaction, *n*-pentane was extracted for 3 times, the organic layer was dried with anhydrous sodium sulfate, filtered and concentrated to dry, and the transparent liquid was obtained by column chromatography (PE) with a yield of 86%.<sup>[2]</sup>

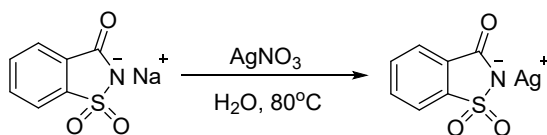

25.50 g (150 mmol) of silver nitrate was dissolved in 150 mL of water, heated to 80 °C and a solution of 37.06 g (153 mmol) of a sodium salt of saccharin in 150 mL of water was added dropwise with stirring. The white precipitate was filtered, washed with water and acetone, dried in air and 42.76 g (98%) of silver salt of saccharin was obtained as fine crystals. [3]

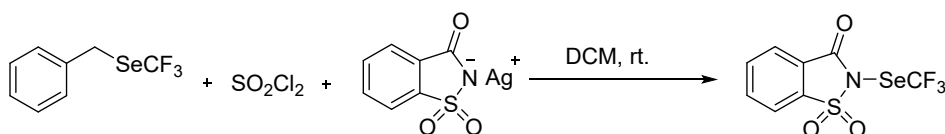

BnSeCF<sub>3</sub> (0.4780g, 2 mmol, 1.0 equiv.), SO<sub>2</sub>Cl<sub>2</sub> (194 μL, 2.4 mmol, 1.2 equiv.), DCM (640 μL) were added into the reaction tube and vacuumized for 3 h at room temperature. Saccharin silver (1.16g, 4 mmol, 2.0 equiv.), DCM (4 mL) were added and reacted at room temperature for about 2 h. The color changed from yellow to colorless. The mixture was filtered (DCM rinsed), spun dry into solids, washed with n-pentane and pumped to obtain a white solid with a yield of 80%.

Amplification reaction: The reaction tube was vacuumized and filled with argon. BnSeCF<sub>3</sub> (7.17 g, 30 mmol, 3.0 equiv.), SO<sub>2</sub>Cl<sub>2</sub> (2.91 mL, 36 mmol, 3.6 equiv.) and DCM (10 mL) were added to react at room temperature for 3 h. Saccharin silver (17.40 g, 60 mmol, 6.0 equiv.), DCM (50 mL) were added and reacted at room temperature for about 3 h. The color changed from yellow to colorless. The mixture was filtered (DCM rinsed), spun dry into solids, washed with n-pentane and pumped to obtain white solids with a yield of 82 %.

### 3) General Procedure for Preparation of 4a, 4b, 4c

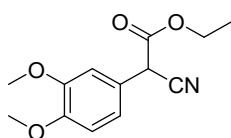

**4ah**, Add 60% sodium hydride (11.3 g, 282 mmol, 2.0 equiv.) to a three-neck flask, vacuum it, and fill it with nitrogen. 3, 4-dimethoxy phenylacetonitrile (25 g, 141 mmol, 1.0 equiv.) was dissolved in anhydrous tetrahydrofuran (120 mL), and solution was dropped into anhydrous tetrahydrofuran (270 mL) containing diethyl carbonate (34.2 mL, 282 mmol, 2.0 equiv.). The mixture is then added to the

three-neck flask using a syringe. Under the condition of 80°C, reflux stirring for 5h, the reaction was cooled in ice bath, treated with cooling water, then extracted with ethyl acetate water layer, the organic layer was dried with anhydrous sodium sulfate, concentrated, column chromatography, the product 23.98 g, the yield of 68%.<sup>[4]</sup>

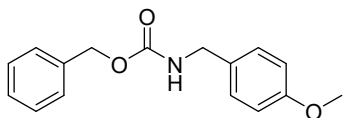

**4ai**, (4-methoxyphenyl) methanamine (2 g, 14.6 mmol, 1.0 equiv.) is dissolved in THF (20 mL). NaOH (2M solution) (1.16g, 29.2mmol, 2.0 equiv.) was added and the reaction mixture was cooled to 0-5 °C. CBZ-Cl (2.74g, 16.0mmol, 1.1 equiv.) was added and stirred at room temperature for 3 h. The reaction was quenched with water and extracted with EtOAc. The organic layer was washed with brine, dried over sodium sulfate and concentrated to afford product (3.82 g, 96% yield).<sup>[5]</sup>

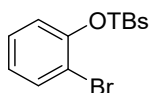

**4ak**, 2-bromophenol (2.5 mL, 23.5 mmol, 1.0 equiv.), imidazole (4 g, 59 mmol, 2.5 equiv.) and TBS-Cl (4.3 g, 57 mmol, 1.2 equiv.) were stirred overnight in DMF (25 mL). The reaction was treated with 150 mL water and extracted with 4 × 25 mL Et<sub>2</sub>O. The organic phase was washed twice with saturated sodium chloride, dried with sodium sulfate and filtered. The solvent was evaporated and the crude product was filtered by silica gel to obtain 6.54 g bromo-2-[(tert-butyl)dimethylsiloxy]benzene (97%).<sup>[6]</sup>

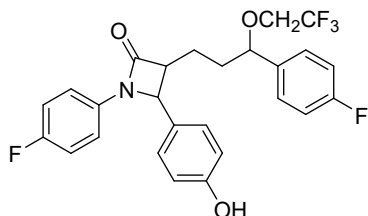

**4cc**, Ezetimibe (0.42 g, 1.03 mmol, 1.0 equiv.), N - trifluoromethylselenolating saccharin (0.41 g, 1.23 mmol, 1.2 equiv.) was added to trifluoroethanol (10 mL) and stirred at room temperature for 12 h. After the reaction was monitored by TLC, the organic layer was extracted with DCM, washed twice with sodium bicarb, dried with sodium sulfate, and condensed by rotary evaporation. The product was 0.32g



with a yield of 63%.

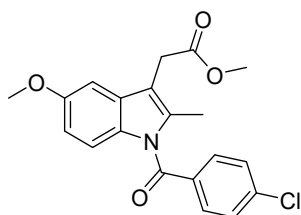

**4cf**, Indomethacin (2.0 g, 5.6 mmol, 1.0 equiv.),  $K_2CO_3$  (2.48 g, 17.92 mmol, 3.2equiv.), and DMF (20 mL) were added to a round-bottom flask. Methane iodide (700  $\mu$ L, 11.2 mmol, 2.0 equiv.) was added and stirred at room temperature for 12 h. After the reaction, the crude product was diluted with water and ethyl acetate. The organic phase was washed with  $H_2O$ , saturated  $K_2CO_3$  and salt water, dried on sodium sulfate, evaporated until dried, and the desired product (1.83 g, 88%) was obtained.<sup>[7]</sup>

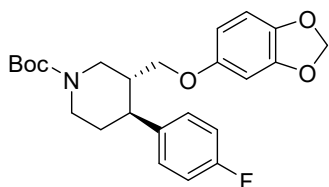

**4cj**, Paroxetine (1.0 g, 3.04 mmol, 1.0 equiv.) was added to 18 mL tetrahydrofuran: $H_2O$  (1:1) to potassium carbonate (1.05 g, 7.6 mmol, 2.5 equiv.). Stir for about 5 minutes, add  $Boc_2O$  (840 mL, 3.65 mmol, 1.2 equiv.), and stir the reaction mixture at room temperature for 3 h. The organic phase and the aqueous phase were separated, the aqueous phase was extracted with ethyl acetate, the organic layer was dried with sodium sulfate, concentrated by rotary evaporation, and the product (1.11 g, 85%) was obtained by column chromatography.<sup>[8]</sup>

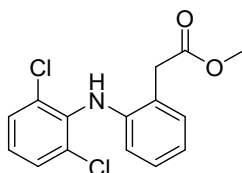

**4ck**, 1-(2,6-Dichlorophenyl)-2-indolinone (3.0 g, 10.13 mmol, 1.0 equiv.),  $K_2CO_3$  (4.48 g, 32.42 mmol, 3.2 equiv.), and DMF (30 mL) were added to a round-bottom flask. Methane iodide (1.3 mL, 20.26 mmol, 2.0 equiv.) was added and stirred at room temperature for 12 h. After the reaction, the crude product was diluted with water and ethyl acetate. The organic phase was washed with  $H_2O$ , saturated  $K_2CO_3$  and salt water, dried on sodium sulfate, evaporated until dried, and the desired product (2.84 g,

90%) was obtained.<sup>[9]</sup>

#### 4) General Procedure for Synthesis of 5a, 5b, 5c

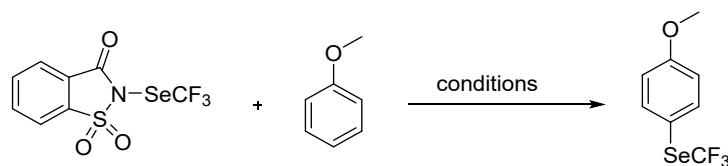

Taking template substrate anisole as an example, selenium reagent 3 (0.1188g, 0.36mm, 1.2eq.), anisole (33  $\mu$ L, 0.3mm, 1.0eq.), trifluoroethanol (2 mL) were added into the reaction tube, and the reaction was conducted overnight at room temperature. TLC monitored the reaction, and DCM was used to extract 3 times. The organic layer was dried with anhydrous sodium sulfate, filtered and concentrated to dry, and the transparent liquid was obtained by column chromatography (PE) with a yield of 91 %.

#### 5) The spectral data of N-trifluoromethylselenolating saccharin

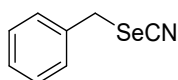

(Selenocyanatomethyl)benzene, white solid (95%), <sup>1</sup>H NMR (400 MHz, Chloroform-*d*)  $\delta$  7.39 – 7.32 (m, 5H), 4.29 (s, 2H); <sup>13</sup>C NMR (101 MHz, Chloroform-*d*)  $\delta$  135.53, 129.15, 129.02, 128.70, 102.09, 32.82.

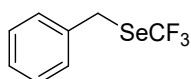

Benzyl(trifluoromethyl)selane, colorless transparent oil (86%), <sup>1</sup>H NMR (400 MHz, Chloroform-*d*)  $\delta$  7.27 – 7.16 (m, 5H), 4.17 (s, 2H); <sup>19</sup>F NMR (376 MHz, Chloroform-*d*)  $\delta$  -34.46 (s, 3F); <sup>13</sup>C NMR (101 MHz, Chloroform-*d*)  $\delta$  136.20, 129.15, 129.02, 127.92, 122.99 (q, *J* = 332.6 Hz), 29.26.

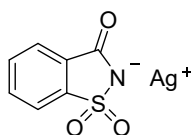

Saccharin silver, white solid (98%), <sup>1</sup>H NMR (400 MHz, DMSO-*d*<sub>6</sub>)  $\delta$  7.89-7.86 (m, 1H), 7.81 – 7.70 (m, 3H); <sup>13</sup>C NMR (101 MHz, DMSO-*d*<sub>6</sub>)  $\delta$  166.63, 143.18, 133.06, 132.97, 132.01, 123.61, 120.20.

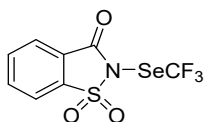

**3**, (N-trifluoromethylselenolating saccharin), white solid (82%), m.p. 46.3-46.6 °C,  $^1\text{H}$  NMR (400 MHz, Chloroform-*d*)  $\delta$  8.15 (d,  $J$  = 7.6 Hz, 1H), 8.01 (d,  $J$  = 7.7 Hz, 1H), 7.96 (t,  $J$  = 7.5 Hz, 1H), 7.92-7.84 (m, 1H);  $^{19}\text{F}$  NMR (376 MHz, Chloroform-*d*)  $\delta$  -38.77 (s, 3F);  $^{13}\text{C}$  NMR (101 MHz, Chloroform-*d*)  $\delta$  159.60, 138.62, 136.03, 134.85, 126.87, 126.50, 122.67 (q,  $J$  = 340.3 Hz), 122.00. HRMS-ESI (m/z) calcd for  $\text{C}_8\text{H}_5\text{F}_3\text{NO}_3\text{SSe}$  (M+H): 331.9102, found: 331.9102. IR:  $\nu$  3095, 2970, 2692, 1750, 1717, 1592, 1458, 1333, 1221, 1174, 1161, 1139, 1088, 1076, 940, 900, 788, 749, 740, 674, 586, 570, 529, 506  $\text{cm}^{-1}$ .

#### 6) The spectral data of 4a, 4b, 4c

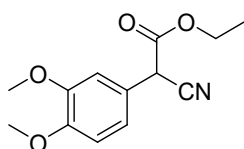

**4ah**, (ethyl 2-cyano-2-(3,4-dimethoxyphenyl)acetate), light yellow solid (68%), m.p. 50.3-50.6 °C.  $^1\text{H}$  NMR (400 MHz, Chloroform-*d*)  $\delta$  7.01-6.98 (m, 1H), 6.93 (t,  $J$  = 1.7 Hz, 1H), 6.87 (dd,  $J$  = 8.3, 1.4 Hz, 1H), 4.65 (s, 1H), 4.28-4.21 (m, 2H), 3.90 (d,  $J$  = 2.0 Hz, 3H), 3.88 (d,  $J$  = 1.9 Hz, 3H), 1.28 (tt,  $J$  = 7.1, 1.9 Hz, 3H);  $^{13}\text{C}$  NMR (101 MHz, Chloroform-*d*)  $\delta$  165.33, 149.84, 149.59, 122.21, 120.64, 115.99, 111.50, 110.67, 63.37, 56.14, 56.08, 43.42, 14.04. IR:  $\nu$  3012, 2986, 2962, 2932, 2838, 1723, 1593, 1514, 1455, 1438, 1421, 1369, 1344, 1314, 1266, 1240, 1195, 1180, 1141, 1030, 1020, 898, 860, 803, 766, 667, 621, 597, 585, 423  $\text{cm}^{-1}$ .

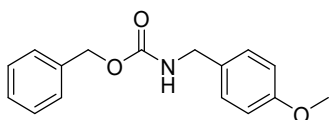

**4ai**, (benzyl (4-methoxybenzyl)carbamate), light yellow solid (96%), m.p. 78.0-78.7 °C.  $^1\text{H}$  NMR (400 MHz, Chloroform-*d*)  $\delta$  7.39 – 7.29 (m, 3H), 7.21 (d,  $J$  = 8.3 Hz, 1H), 6.89 – 6.82 (m, 1H), 5.13 (s, 1H), 4.32 (d,  $J$  = 5.9 Hz, 1H), 3.79 (s, 2H);  $^{13}\text{C}$  NMR (101 MHz, Chloroform-*d*)  $\delta$  159.11, 156.45, 136.62, 130.60, 129.04, 128.63, 128.24, 114.13, 66.89, 55.39, 44.72. IR:  $\nu$  3314, 3062, 3034, 3017, 2941, 2834, 1687, 1611, 1543, 1510, 1454, 1442, 1268, 1235, 1174, 1143, 1129, 1109, 1051, 1031, 1002, 919, 808,

729, 692, 680, 574, 515, 444, 412 cm<sup>-1</sup>.

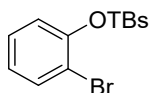

**4ak**, ((2-bromophenoxy)(tert-butyl)dimethylsilane), colorless transparent oil (97%), <sup>1</sup>H NMR (400 MHz, Chloroform-*d*) δ 7.56-7.52 (m, 1H), 7.21-7.17 (m, 1H), 6.91 (dd, *J* = 8.1, 1.5 Hz, 1H), 6.84 (td, *J* = 7.7, 1.5 Hz, 1H), 1.09 (s, 9H), 0.29 (s, 6H); <sup>13</sup>C NMR (101 MHz, Chloroform-*d*) δ 152.74, 133.56, 128.35, 122.49, 120.42, 115.54, 25.89, 18.49, -4.09. IR: ν 2958, 2930, 2895, 2886, 2858, 1583, 1475, 1440, 1283, 1252, 1047, 1030, 915, 837, 823, 807, 780, 750, 671, 440 cm<sup>-1</sup>.

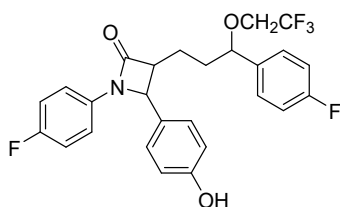

**4cc**, (1-(4-fluorophenyl)-3-(3-(4-fluorophenyl)-3-(2,2,2-trifluoroethoxy)propyl)-4-(4-hydroxyphenyl)azetidin-2-one), white solid (63%), m.p. 114.5-115.0 °C, <sup>1</sup>H NMR (400 MHz, Chloroform-*d*) δ 7.25 – 7.16 (m, 6H), 7.05 (td, *J* = 8.5, 4.9 Hz, 2H), 6.92 (td, *J* = 8.6, 3.4 Hz, 2H), 6.85 – 6.81 (m, 2H), 4.98 (s, 1H), 4.55 (dd, *J* = 15.7, 2.4 Hz, 1H), 4.47 – 4.35 (m, 1H), 3.60 (dddd, *J* = 27.8, 12.2, 9.4, 7.3 Hz, 2H), 3.05 (dd, *J* = 25.2, 6.7 Hz, 1H), 2.09 – 1.79 (m, 4H); <sup>19</sup>F NMR (376 MHz, Chloroform-*d*) δ -73.90 (s, 3F), -113.43 (s, 1F), -118.06 (s, 1F); <sup>13</sup>C NMR (101 MHz, Chloroform-*d*) δ 167.86, 157.98, 156.47, 135.93, 135.75, 133.82, 128.48, 128.40, 128.31, 127.47, 124.08 (q, *J* = 278.7, 273.6 Hz), 118.68, 118.60, 116.31, 116.08, 116.05, 116.02, 115.85, 115.81, 82.64, 82.56, 66.06, 65.89 (q, *J* = 34.4 Hz), 65.73, 61.20, 60.99, 60.28, 60.15, 35.77, 35.24, 25.21, 24.71. HRMS-ESI (*m/z*) calcd for C<sub>26</sub>H<sub>22</sub>F<sub>5</sub>NNaO<sub>3</sub> (M+Na): 514.1412, found: 514.1412. IR: ν 2924, 1716, 1604, 1508, 1449, 1392, 1357, 1273, 1221, 1153, 1117, 1103, 968, 832, 669, 546, 515, 425 cm<sup>-1</sup>.

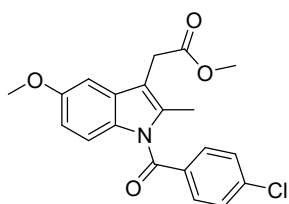

**4cf**, (methyl 2-(1-(4-chlorobenzoyl)-5-methoxy-2-methyl-1H-indol-3-yl)acetate), light yellow solid

(88%), m.p. 59.9-60.4 °C. <sup>1</sup>H NMR (400 MHz, Chloroform-*d*) δ 7.70 – 7.63 (m, 2H), 7.51 – 7.41 (m, 2H), 6.96 (d, *J* = 2.6 Hz, 1H), 6.86 (d, *J* = 9.0 Hz, 1H), 6.67 (dd, *J* = 9.0, 2.6 Hz, 1H), 3.84 (s, 3H), 3.71 (s, 3H), 3.67 (s, 2H), 2.39 (s, 3H); <sup>13</sup>C NMR (101 MHz, Chloroform-*d*) δ 171.48, 168.43, 156.16, 139.39, 136.11, 134.01, 131.32, 130.90, 130.76, 129.25, 115.09, 112.62, 111.72, 101.39, 55.83, 52.30, 30.25, 13.46. IR: *ν* 3125, 3005, 2960, 2930, 2835, 1731, 1667, 1605, 1476, 1467, 1432, 1399, 363, 1323, 1291, 1234, 1214, 1190, 1167, 1153, 1085, 1072, 1036, 1025, 1014, 992, 914, 870, 845, 805, 752, 604, 482, 456, 441 cm<sup>-1</sup>.

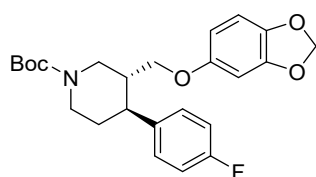

**4cj**, (tert-butyl-(3R,4S)-3-((benzo[d][1,3]dioxol-5-yloxy)methyl)-4-(4-fluorophenyl)piperidine-1-carboxylate), light yellow oil (85%), <sup>1</sup>H NMR (500 MHz, Chloroform-*d*) δ 7.17 – 7.11 (m, 2H), 7.01 – 6.94 (m, 2H), 6.62 (d, *J* = 8.5 Hz, 1H), 6.35 (d, *J* = 2.5 Hz, 1H), 6.13 (dd, *J* = 8.5, 2.5 Hz, 1H), 5.88 (s, 2H), 4.34 (d, *J* = 96.6 Hz, 2H), 3.60 (dd, *J* = 9.5, 2.9 Hz, 1H), 3.44 (dd, *J* = 9.4, 6.5 Hz, 1H), 2.84 – 2.75 (m, 2H), 2.67 (td, *J* = 11.9, 3.8 Hz, 1H), 2.04-1.99 (m, 1H), 1.85 – 1.76 (m, 1H), 1.74-1.66 (m, 1H), 1.49 (s, 9H); <sup>13</sup>C NMR (101 MHz, Chloroform-*d*) δ 154.94, 154.37, 148.28, 141.77, 128.93, 128.85, 115.74, 115.53, 107.96, 105.62, 101.23, 98.09, 79.80, 77.36, 68.88, 44.16, 28.59. IR: *ν* 3013, 2981, 2916, 2861, 1682, 1510, 1488, 1469, 1428, 1366, 1280, 1216, 1181, 1159, 1132, 1040, 937, 831, 750, 667, 534 cm<sup>-1</sup>.

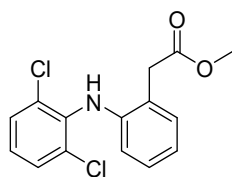

**4ck**, (methyl 2-((2,6-dichlorophenyl)amino)phenyl)acetate), light yellow solid (90%), m.p. 102.6-103.0 °C, <sup>1</sup>H NMR (400 MHz, Chloroform-*d*) δ 7.35 (d, *J* = 8.1 Hz, 2H), 7.23 (dd, *J* = 7.5, 1.4 Hz, 1H), 7.13 (td, *J* = 7.8, 1.5 Hz, 1H), 6.99 (d, *J* = 8.0 Hz, 1H), 6.98 – 6.92 (m, 2H), 6.55 (d, *J* = 8.0 Hz, 1H), 3.82 (s, 2H), 3.75 (s, 3H); <sup>13</sup>C NMR (101 MHz, Chloroform-*d*) δ 172.77, 142.77, 137.83, 131.02, 129.62, 129.00, 128.13, 124.18, 124.17, 122.06, 118.20, 52.57, 38.62. IR: *ν* 3351, 2953, 1736, 1587, 1566, 1504, 1475, 1448, 1429, 1415, 1293, 1279, 1260, 1233, 1193, 1145, 1095, 1011, 842, 779, 749, 713, 658, 637, 604, 567, 504, 475, 444 cm<sup>-1</sup>.

## 7) The spectral data of 5a, 5b, 5c

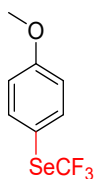

**5aa**, ((4-methoxyphenyl) (trifluoromethyl)selane), colorless transparent oil (91%),  $^1\text{H}$  NMR (400 MHz, Chloroform-*d*)  $\delta$  7.70 – 7.62 (m, 2H), 6.94 – 6.87 (m, 2H), 3.83 (s, 3H);  $^{19}\text{F}$  NMR (376 MHz, Chloroform-*d*)  $\delta$  -37.18 (s, 3F);  $^{13}\text{C}$  NMR (101 MHz, Chloroform-*d*)  $\delta$  161.59, 139.10, 115.32, 122.65 (q,  $J = 333.1$  Hz), 55.48. IR:  $\nu$  3364, 2965, 2943, 2929, 1592, 1492, 1458, 1442, 1293, 1252, 1089, 826, 736, 517, 427, 410  $\text{cm}^{-1}$ .

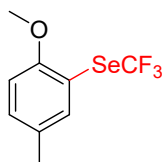

**5ab**, ((2-methoxy-5-methylphenyl)(trifluoromethyl)selane), colorless transparent oil (83%),  $^1\text{H}$  NMR (400 MHz, Chloroform-*d*)  $\delta$  7.52 – 7.47 (m, 1H), 7.25 – 7.17 (m, 1H), 6.86 (d,  $J = 8.4$  Hz, 1H), 3.86 (s, 3H), 2.31 (s, 3H);  $^{19}\text{F}$  NMR (376 MHz, Chloroform-*d*)  $\delta$  -35.27 (s, 3F);  $^{13}\text{C}$  NMR (101 MHz, Chloroform-*d*)  $\delta$  157.24, 137.93, 132.45, 131.23, 122.69 (q,  $J = 333.2$  Hz), 111.38, 56.29, 20.36. HRMS-ESI ( $m/z$ ) calcd for  $\text{C}_9\text{H}_{10}\text{F}_3\text{OSe}$  ( $\text{M}+\text{H}$ ): 270.9844, found: 270.9829. IR:  $\nu$  2966, 2944, 2927, 1602, 1491, 1463, 1440, 1279, 1253, 1119, 1090, 1053, 1025, 807, 735, 557, 452  $\text{cm}^{-1}$ .

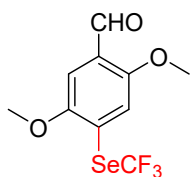

**5ac**, (2,5-dimethoxy-4-((trifluoromethyl)selanyl)benzaldehyde), white solid (89%), m.p. 93.9-94.3  $^{\circ}\text{C}$ ,  $^1\text{H}$  NMR (400 MHz,  $\text{DMSO-}d_6$ )  $\delta$  10.33 (s, 1H), 7.46 (s, 1H), 7.35 (s, 1H), 3.92 (s, 3H), 3.87 (s, 3H);  $^{19}\text{F}$  NMR (376 MHz, Chloroform-*d*)  $\delta$  -34.13 (s, 3F);  $^{13}\text{C}$  NMR (101 MHz,  $\text{DMSO-}d_6$ )  $\delta$  188.47, 155.54, 152.22, 125.71, 122.77 (q,  $J = 333.6$  Hz), 121.30, 120.12, 108.94, 56.71. HRMS-ESI ( $m/z$ ) calcd for  $\text{C}_{10}\text{H}_{10}\text{F}_3\text{O}_3\text{Se}$  ( $\text{M}+\text{H}$ ): 314.9742, found: 314.9733. IR:  $\nu$  2973, 2941, 2885, 2852, 1726, 1683, 1676, 1601, 1479, 1463, 1377, 1278, 1214, 1095, 1048, 1020, 870, 737, 720, 670, 601, 462,

421  $\text{cm}^{-1}$ .

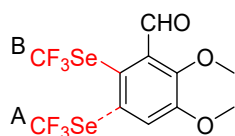

**5ad**, 97%, A:B = 5:4, A (2,3-dimethoxy-5-((trifluoromethyl)selanyl)benzaldehyde): light yellow solid, m.p. 52.0-52.4  $^{\circ}\text{C}$ ,  $^1\text{H}$  NMR (400 MHz, Chloroform-*d*)  $\delta$  10.47 (s, 1H), 7.41-7.38 (m, 1H), 7.17 (d,  $J = 8.8$  Hz, 1H), 4.01 (s, 3H), 3.92 (s, 3H);  $^{19}\text{F}$  NMR (376 MHz, Chloroform-*d*)  $\delta$  -36.78 (s, 3F);  $^{13}\text{C}$  NMR (101 MHz, Chloroform-*d*)  $\delta$  191.11, 154.45, 151.59, 128.17, 124.95, 123.46 (q,  $J = 333.1$  Hz), 121.96, 119.34, 62.60, 56.37. HRMS-ESI ( $m/z$ ) calcd for  $\text{C}_{10}\text{H}_{10}\text{F}_3\text{O}_3\text{Se}$  (M+H): 314.9742, found: 314.9732. IR:  $\nu$  2948, 2921, 2896, 2842, 1656, 1568, 1478, 1436, 1414, 1376, 1269, 1245, 1095, 1073, 990, 932, 806, 776, 733, 670, 587, 492, 420  $\text{cm}^{-1}$ . B (2,3-dimethoxy-6-((trifluoromethyl)selanyl)benzaldehyde): light yellow oil,  $^1\text{H}$  NMR (400 MHz, Chloroform-*d*)  $\delta$  10.40 (s, 1H), 7.78 (d,  $J = 2.1$  Hz, 1H), 7.44 (d,  $J = 2.1$  Hz, 1H), 4.04 (s, 3H), 3.94 (s, 3H);  $^{19}\text{F}$  NMR (376 MHz, Chloroform-*d*)  $\delta$  -36.00 (s, 3F);  $^{13}\text{C}$  NMR (101 MHz, Chloroform-*d*)  $\delta$  188.94, 154.37, 153.41, 130.06, 128.40, 125.74, 124.08, 122.43 (q,  $J = 337.1$  Hz), 120.77, 117.22, 62.41, 56.36. HRMS-ESI ( $m/z$ ) calcd for  $\text{C}_{10}\text{H}_{10}\text{F}_3\text{O}_3\text{Se}$  (M+H): 314.9742, found: 314.9732. IR:  $\nu$  2941, 2900, 2841, 1686, 1659, 1569, 1479, 1435, 1414, 1377, 1303, 1264, 1243, 1092, 1073, 992, 930, 806, 775, 734, 670, 600, 587, 491  $\text{cm}^{-1}$ .

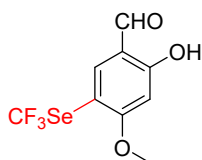

**5ae**, (2-hydroxy-4-methoxy-5-((trifluoromethyl)selanyl)benzaldehyde), white solid (91%), m.p. 73.9-74.4  $^{\circ}\text{C}$ ,  $^1\text{H}$  NMR (400 MHz, Chloroform-*d*)  $\delta$  11.68 (s, 1H), 9.74 (s, 1H), 7.89 (s, 1H), 6.52 (s, 1H), 3.96 (s, 3H);  $^{19}\text{F}$  NMR (376 MHz, Chloroform-*d*)  $\delta$  -36.18 (s, 3F);  $^{13}\text{C}$  NMR (101 MHz, Chloroform-*d*)  $\delta$  194.18, 166.79, 166.61, 145.11, 122.35 (q,  $J = 334.1$  Hz), 115.92, 100.06, 56.88. HRMS-ESI ( $m/z$ ) calcd for  $\text{C}_9\text{H}_8\text{F}_3\text{O}_3\text{Se}$  (M+H): 300.9585, found: 300.9577. IR:  $\nu$  3618, 2982, 2948, 2913, 2860, 1637, 1616, 1570, 1484, 1469, 1455, 1441, 1363, 1330, 1274, 1209, 1174, 1124, 1090, 1043, 987, 911, 853, 829, 784, 735, 685, 558, 469  $\text{cm}^{-1}$ .

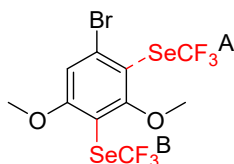

**5af**, (A: (2-bromo-4,6-dimethoxyphenyl)(trifluoromethyl)selane; B: (4-bromo-2,6-dimethoxyphenyl)(trifluoromethyl)selane), white solid (69%), m.p. 69.8-70.2 °C, A:B=10:1, <sup>1</sup>H NMR (400 MHz, Chloroform-*d*) δ 6.91 (d, *J* = 2.5 Hz, 1H), 6.45 (d, *J* = 2.6 Hz, 1H), 3.88 (s, 1H), 3.84 (s, 3H), 6.77 (s, 0.2H), 3.88 (s, 0.6H). (A:B=10:1); <sup>19</sup>F NMR (376 MHz, Chloroform-*d*) δ -35.73 (s, 3F), -34.99. (A:B=10:1); <sup>13</sup>C NMR (126 MHz, Chloroform-*d*) δ 163.52, 162.71, 134.48, 122.57 (q, *J* = 336.5 Hz), 110.52, 98.40, 56.74, 55.89, 161.53, 127.30, 122.57 (q, *J* = 336.5 Hz), 108.52, 106.95, 56.74. (A:B=10:1) HRMS-ESI (*m/z*) calcd for C<sub>9</sub>H<sub>9</sub>BrF<sub>3</sub>O<sub>2</sub>Se (M+H): 364.8898, found:364.8898. IR: *ν* 2979, 2951, 2921, 2850, 1574, 1560, 1452, 1424, 1401, 1363, 1301, 1277, 1216, 1089, 1078, 1037, 933, 833, 810, 735, 624, 575, 458 cm<sup>-1</sup>.

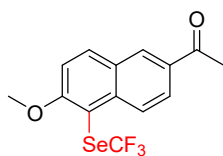

**5ag**, (1-(6-methoxy-5-((trifluoromethyl)selanyl)naphthalen-2-yl)ethan-1-one), white solid (96%), m.p. 119.7-120.3 °C, <sup>1</sup>H NMR (400 MHz, Chloroform-*d*) δ 8.54 (d, *J* = 9.0 Hz, 1H), 8.43 (d, *J* = 1.8 Hz, 1H), 8.17 – 8.09 (m, 2H), 7.43 (d, *J* = 9.1 Hz, 1H), 4.08 (s, 3H), 2.72 (s, 3H); <sup>19</sup>F NMR (376 MHz, Chloroform-*d*) δ -34.87 (s, 3F); <sup>13</sup>C NMR (101 MHz, Chloroform-*d*) δ 197.66, 161.48, 139.44, 135.71, 133.00, 130.58, 128.49, 127.99, 126.30, 122.50 (q, *J* = 336.5 Hz), 113.70, 107.43, 57.05, 26.80. HRMS-ESI (*m/z*) calcd for C<sub>14</sub>H<sub>12</sub>F<sub>3</sub>O<sub>2</sub>Se (M+H): 348.9949, found: 348.9933. IR: *ν* 2980, 2951, 2920, 2849, 1673, 1619, 1588, 1574, 1561, 1454, 1401, 1361, 1275, 1216, 1117, 1086, 1052, 911, 834, 811, 735, 682, 575, 518, 419 cm<sup>-1</sup>.

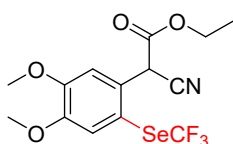

**5ah**, (ethyl 2-cyano-2-(4,5-dimethoxy-2-((trifluoromethyl)selanyl)phenyl)acetate), light yellow viscous oil (81%), <sup>1</sup>H NMR (400 MHz, Chloroform-*d*) δ 7.31 (s, 1H), 7.18 (s, 1H), 5.55 (s, 1H), 4.33 – 4.18 (m,



2H), 3.96 (s, 3H), 3.93 (s, 3H), 1.30 (t,  $J = 7.2$  Hz, 3H);  $^{19}\text{F}$  NMR (376 MHz, Chloroform-*d*)  $\delta$  -36.19 (s, 3F);  $^{13}\text{C}$  NMR (101 MHz, Chloroform-*d*)  $\delta$  164.93, 152.05, 149.83, 128.78, 122.26 (q,  $J = 334.4$  Hz), 121.33, 115.85, 114.64, 111.23, 63.71, 56.40, 56.35, 43.57, 29.79, 13.99. HRMS-ESI ( $m/z$ ) calcd for  $\text{C}_{14}\text{H}_{14}\text{F}_3\text{NNaO}_4\text{Se}$  ( $\text{M}+\text{Na}$ ): 419.9932, found: 419.9925. IR:  $\nu$  2967, 2938, 2850, 1745, 1645, 1589, 1560, 1509, 1459, 1445, 1346, 1251, 1122, 1090, 1017, 974, 864, 737, 675, 409  $\text{cm}^{-1}$ .

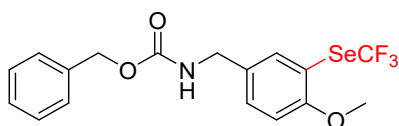

**5ai**, (benzyl (4-methoxy-3-((trifluoromethyl)selanyl)benzyl)carbamate), light yellow solid (51%), m.p. 67.5-67.8  $^{\circ}\text{C}$ ,  $^1\text{H}$  NMR (400 MHz, Chloroform-*d*)  $\delta$  7.58 (d,  $J = 2.3$  Hz, 1H), 7.39 – 7.31 (m, 6H), 6.91 (d,  $J = 8.4$  Hz, 1H), 5.14 (s, 2H), 5.11 – 5.05 (m, 1H), 4.33 (d,  $J = 6.0$  Hz, 2H), 3.88 (s, 3H);  $^{19}\text{F}$  NMR (376 MHz, Chloroform-*d*)  $\delta$  -35.07 (s, 3F);  $^{13}\text{C}$  NMR (101 MHz, Chloroform-*d*)  $\delta$  158.62, 156.50, 136.55, 136.50, 132.00, 131.33, 128.65, 128.28, 128.22, 122.59 (q,  $J = 333.3$  Hz), 111.53, 67.01, 56.30, 44.20. HRMS-ESI ( $m/z$ ) calcd for  $\text{C}_{17}\text{H}_{16}\text{F}_3\text{NNaO}_3\text{Se}$  ( $\text{M}+\text{Na}$ ): 442.0140, found: 442.0129. IR:  $\nu$  3329, 2953, 2936, 2851, 1691, 1536, 1493, 1454, 1437, 1262, 1103, 1044, 1019, 974, 819, 750, 736, 698, 662, 596, 460, 408  $\text{cm}^{-1}$ .

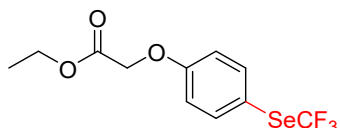

**5aj**, (ethyl 2-(4-((trifluoromethyl)selanyl)phenoxy)acetate), white solid (95%), m.p. 53.9-54.2  $^{\circ}\text{C}$ ,  $^1\text{H}$  NMR (400 MHz, Chloroform-*d*)  $\delta$  7.75 – 7.59 (m, 2H), 7.00 – 6.85 (m, 2H), 4.64 (s, 2H), 4.28 (q,  $J = 7.1$  Hz, 2H), 1.30 (t,  $J = 7.1$  Hz, 3H);  $^{19}\text{F}$  NMR (376 MHz, Chloroform-*d*)  $\delta$  -36.94 (s, 3F);  $^{13}\text{C}$  NMR (101 MHz, Chloroform-*d*)  $\delta$  168.47, 159.75, 139.10, 122.57 (q,  $J = 333.0$  Hz), 115.93, 114.26, 65.35, 61.70, 14.24. IR:  $\nu$  2982, 2951, 2921, 2850, 1740, 1673, 1620, 1587, 1574, 1561, 1472, 1454, 1401, 1275, 1216, 1088, 1077, 911, 834, 810, 735, 575, 419  $\text{cm}^{-1}$ .

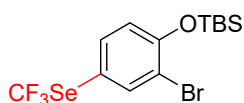

**5ak**, ((2-bromo-4-((trifluoromethyl)selanyl)phenoxy)(tert-butyl)dimethylsilane), colorless transparent oil

(72%),  $^1\text{H}$  NMR (400 MHz, Chloroform-*d*)  $\delta$  7.91 (d,  $J = 2.1$  Hz, 1H), 7.53 (dd,  $J = 8.4, 2.2$  Hz, 1H), 6.86 (d,  $J = 8.4$  Hz, 1H), 1.05 (s, 9H), 0.28 (s, 6H);  $^{19}\text{F}$  NMR (376 MHz, Chloroform-*d*)  $\delta$  -36.69 (s, 3F);  $^{13}\text{C}$  NMR (101 MHz, Chloroform-*d*)  $\delta$  155.06, 142.00, 137.64, 122.55 (q,  $J = 334.5$  Hz), 120.88, 116.31, HRMS-ESI ( $m/z$ ) calcd for  $\text{C}_{13}\text{H}_{19}\text{BrF}_3\text{OSeSi}$  ( $\text{M}+\text{H}$ ): 434.9500, found: 434.9500. IR:  $\nu$  3294, 2958, 2931, 2888, 2859, 1720, 1657, 1530, 1476, 1296, 1258, 1234, 1130, 1094, 1044, 911, 841, 806, 782, 738, 680, 593, 506, 477  $\text{cm}^{-1}$ .

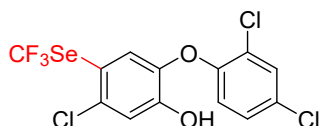

**5al**, (5-chloro-2-(2,4-dichlorophenoxy)-4-((trifluoromethyl)selanyl)phenol), light brown solid (87%), m.p. 70.2-70.8  $^{\circ}\text{C}$ ,  $^1\text{H}$  NMR (400 MHz, DMSO- $d_6$ )  $\delta$  11.07 (s, 1H), 7.74 (d,  $J = 2.5$  Hz, 1H), 7.48 (s, 1H), 7.37 (dd,  $J = 8.8, 2.5$  Hz, 1H), 7.26 (s, 1H), 6.81 (d,  $J = 8.8$  Hz, 1H);  $^{19}\text{F}$  NMR (376 MHz, DMSO- $d_6$ )  $\delta$  -36.41 (s, 3F);  $^{13}\text{C}$  NMR (101 MHz, Chloroform-*d*)  $\delta$  149.70, 149.56, 142.69, 136.32, 131.13, 128.68, 126.76, 126.73, 122.43 (q,  $J = 334.1$  Hz), 121.50, 118.11, 113.26. HRMS-ESI ( $m/z$ ) calcd for  $\text{C}_{13}\text{H}_6\text{Cl}_3\text{F}_3\text{NaO}_2\text{Se}$  ( $\text{M}+\text{Na}$ ): 458.8443, found: 458.8443. IR:  $\nu$  3513, 1576, 1471, 1394, 1319, 1253, 1201, 1088, 945, 869, 839, 802, 756, 737, 705, 666, 571, 428  $\text{cm}^{-1}$ .

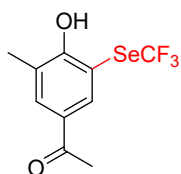

**5am**, (1-(4-hydroxy-3-methyl-5-((trifluoromethyl)selanyl)phenyl)ethan-1-one), white solid (81%), m.p. 79.7-80.0  $^{\circ}\text{C}$ ,  $^1\text{H}$  NMR (400 MHz, Chloroform-*d*)  $\delta$  8.15 (d,  $J = 2.2$  Hz, 1H), 7.94 – 7.86 (m, 1H), 6.72 (s, 1H), 2.56 (s, 3H), 2.36 (s, 3H);  $^{19}\text{F}$  NMR (376 MHz, Chloroform-*d*)  $\delta$  -35.34 (s, 3F);  $^{13}\text{C}$  NMR (101 MHz, Chloroform-*d*)  $\delta$  195.94, 159.49, 137.57, 135.12, 130.61, 125.76, 121.69 (q,  $J = 335.2$  Hz), 108.72, 26.30, 16.87. HRMS-ESI ( $m/z$ ) calcd for  $\text{C}_{10}\text{H}_{10}\text{F}_3\text{O}_2\text{Se}$  ( $\text{M}+\text{H}$ ): 298.9793, found: 298.9780. IR:  $\nu$  3342, 2980, 2953, 2920, 2852, 1668, 1619, 1588, 1575, 1560, 1473, 1454, 1401, 1359, 1275, 1228, 1117, 1080, 976, 834, 811, 735, 624, 562, 424  $\text{cm}^{-1}$ .

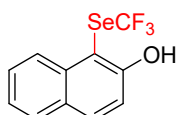

**5an**, (1-((trifluoromethyl)selanyl)naphthalen-2-yl)phenylacetamide, white solid (93%), m.p. 87.2-87.7 °C,  $^1\text{H}$  NMR (400 MHz, Chloroform-*d*)  $\delta$  8.31 (d,  $J = 8.5$  Hz, 1H), 7.94 (d,  $J = 8.9$  Hz, 1H), 7.83 – 7.78 (m, 1H), 7.60 (ddd,  $J = 8.4, 6.9, 1.3$  Hz, 1H), 7.44-7.40 (m, 1H), 7.34 (d,  $J = 8.9$  Hz, 1H), 6.84 (s, 1H);  $^{19}\text{F}$  NMR (376 MHz, Chloroform-*d*)  $\delta$  -34.64 (s, 3F);  $^{13}\text{C}$  NMR (101 MHz, Chloroform-*d*)  $\delta$  157.32, 135.97, 134.70, 129.52, 128.65, 128.43, 126.63, 124.29, 122.03 (q,  $J = 337.0$  Hz), 120.35, 116.88, 103.80. HRMS-ESI (m/z) calcd for  $\text{C}_{11}\text{H}_7\text{F}_3\text{NaOSe}$  (M+Na): 314.9506, found: 314.9506. IR:  $\nu$  3421, 2966, 2922, 2851, 1616, 1592, 1565, 1508, 1562, 1382, 1347, 1196, 1119, 1093, 928, 867, 823, 769, 751, 736, 644, 541, 507, 416  $\text{cm}^{-1}$ .

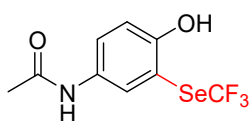

**5ao**, (N-(4-hydroxy-3-((trifluoromethyl)selanyl)phenyl)phenyl)acetamide), white solid (53%), m.p. 153.4-153.9 °C,  $^1\text{H}$  NMR (400 MHz, DMSO- $d_6$ )  $\delta$  10.14 (s, 1H), 9.86 (s, 1H), 7.89 (d,  $J = 2.5$  Hz, 1H), 7.48 (dd,  $J = 8.8, 2.6$  Hz, 1H), 6.92 (d,  $J = 8.8$  Hz, 1H), 1.99 (s, 3H);  $^{19}\text{F}$  NMR (376 MHz, DMSO- $d_6$ )  $\delta$  -34.99 (s, 3F);  $^{13}\text{C}$  NMR (101 MHz, DMSO- $d_6$ )  $\delta$  167.91, 153.65, 131.97, 127.80, 127.62, 124.48, 123.42, 122.83 (q,  $J = 335.0$  Hz), 121.17, 115.75, 108.97, 23.80. HRMS-ESI (m/z) calcd for  $\text{C}_9\text{H}_9\text{F}_3\text{NO}_2\text{Se}$  (M+H): 299.9745, found: 299.9736. IR:  $\nu$  3406, 3295, 1719, 1658, 1593, 1531, 1483, 1337, 1260, 1229, 1202, 1153, 1135, 1094, 889, 841, 832, 805, 738, 594, 518, 508, 458  $\text{cm}^{-1}$ .

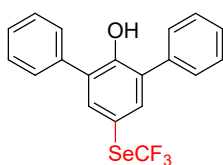

**5ap**, (5'-((trifluoromethyl)selanyl)-[1,1':3',1''-terphenyl]-2'-ol), white solid (90%), m.p. 72.9-73.6 °C,  $^1\text{H}$  NMR (400 MHz, Chloroform-*d*)  $\delta$  7.66 (s, 2H), 7.59 – 7.47 (m, 8H), 7.46 – 7.40 (m, 2H), 5.66 (s, 1H);  $^{19}\text{F}$  NMR (376 MHz, Chloroform-*d*)  $\delta$  -36.75 (s, 3F);  $^{13}\text{C}$  NMR (101 MHz, Chloroform-*d*)  $\delta$  151.61, 138.87, 136.22, 130.30, 129.40, 129.21, 128.4, 122.67 (q,  $J = 333.2$  Hz). HRMS-ESI (m/z) calcd for  $\text{C}_{19}\text{H}_{14}\text{F}_3\text{Ose}$  (M+H): 395.0157, found: 395.0105. IR:  $\nu$  3535, 2983, 2952, 2922, 2850, 1673, 1620, 1575, 1560, 1456, 1422, 1400, 1277, 1228, 1116, 1089, 1077, 835, 811, 781, 771, 736, 715, 697, 629, 583  $\text{cm}^{-1}$ .

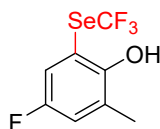

**5aq**, (4-fluoro-2-methyl-6-((trifluoromethyl)selanyl)phenol), light yellow oil (79%),  $^1\text{H}$  NMR (400 MHz, Chloroform-*d*)  $\delta$  7.22 (dd,  $J = 7.3, 3.1$  Hz, 1H), 7.03 (dd,  $J = 8.7, 3.1$  Hz, 1H), 6.11 (s, 1H), 2.30 (s, 3H);  $^{19}\text{F}$  NMR (376 MHz, Chloroform-*d*)  $\delta$  -35.43 (s, 3F), -123.21 (s, 1F);  $^{13}\text{C}$  NMR (101 MHz, Chloroform-*d*)  $\delta$  155.55 (d,  $J = 242.5$  Hz), 151.94 (d,  $J = 2.3$  Hz), 126.86 (d,  $J = 7.3$  Hz), 121.98 (d,  $J = 22.6$  Hz), 121.74 (q,  $J = 335.4$  Hz), 121.46 (d,  $J = 23.4$  Hz), 107.71 (d,  $J = 8.4$  Hz), 17.08. HRMS-ESI ( $m/z$ ) calcd for  $\text{C}_8\text{H}_7\text{F}_4\text{OSe}$  (M+H): 274.9593, found: 274.9593. IR:  $\nu$  3535, 2979, 2947, 2923, 1673, 1589, 1559, 1470, 1422, 1401, 1277, 1228, 1083, 835, 812, 781, 767, 736, 698, 628, 583, 419  $\text{cm}^{-1}$ .

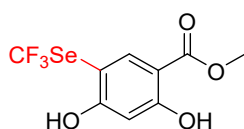

**5ar**, (methyl 2,4-dihydroxy-5-((trifluoromethyl)selanyl)benzoate), white solid (81%), m.p. 87.8-88.4  $^{\circ}\text{C}$ ,  $^1\text{H}$  NMR (400 MHz, Chloroform-*d*)  $\delta$  11.15 (s, 1H), 8.21 (s, 1H), 6.67 (s, 1H), 6.53 (s, 1H), 3.95 (s, 3H);  $^{19}\text{F}$  NMR (376 MHz, Chloroform-*d*)  $\delta$  -36.46 (s, 3F);  $^{13}\text{C}$  NMR (101 MHz, Chloroform-*d*)  $\delta$  169.56, 166.58, 162.91, 141.99, 123.39, 121.72 (q,  $J = 335.7$  Hz), 120.05, 107.76, 103.50, 100.33, 52.58. HRMS-ESI ( $m/z$ ) calcd for  $\text{C}_9\text{H}_7\text{F}_3\text{NaO}_4\text{Se}$  (M+Na): 338.9354, found: 338.9354. IR:  $\nu$  3335, 2953, 2924, 2853, 1670, 1613, 1587, 1443, 1410, 1349, 1321, 1265, 1229, 1195, 1134, 1088, 1023, 951, 835, 787, 736, 681, 597, 460, 444  $\text{cm}^{-1}$ .

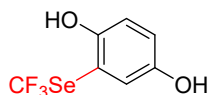

**5as**, (2-((trifluoromethyl)selanyl)benzene-1,4-diol), white solid (55%), m.p. 90.1-90.4  $^{\circ}\text{C}$ ,  $^1\text{H}$  NMR (400 MHz, DMSO- $d_6$ )  $\delta$  9.62 (s, 1H), 9.12 (s, 1H), 6.96 (d,  $J = 2.7$  Hz, 1H), 6.82 (d,  $J = 8.7$  Hz, 1H), 6.75 (dd,  $J = 8.7, 2.9$  Hz, 1H);  $^{19}\text{F}$  NMR (376 MHz, DMSO- $d_6$ )  $\delta$  -34.94 (s, 3F);  $^{13}\text{C}$  NMR (126 MHz, DMSO- $d_6$ )  $\delta$  150.40, 150.29, 122.87 (q,  $J = 333.4$  Hz), 122.38, 119.10, 116.56, 109.32. HRMS-ESI ( $m/z$ ) calcd for  $\text{C}_7\text{H}_6\text{F}_3\text{O}_2\text{Se}$  (M+H): 258.9480, found: 258.9480. IR:  $\nu$  3421, 2980, 2954, 2930, 1457, 1423, 1298, 1156, 1145, 1134, 1082, 1070, 1050, 887, 789, 738, 473, 445  $\text{cm}^{-1}$ .

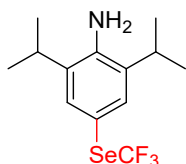

**5at**, (2,6-diisopropyl-4-((trifluoromethyl)selanyl)aniline), light yellow solid (99%), m.p. 74.1-74.5 °C,  $^1\text{H}$  NMR (400 MHz, Chloroform-*d*)  $\delta$  7.37 (s, 2H), 2.96-2.86 (m, 2H), 1.29 (s, 6H), 1.27 (s, 6H);  $^{19}\text{F}$  NMR (376 MHz, Chloroform-*d*)  $\delta$  -37.51 (s, 3F);  $^{13}\text{C}$  NMR (101 MHz, Chloroform-*d*)  $\delta$  142.68, 133.37, 132.53, 110.39, 119.50 (q,  $J = 333.6$  Hz), 28.07, 22.31. HRMS-ESI ( $m/z$ ) calcd for  $\text{C}_{13}\text{H}_{19}\text{F}_3\text{NSe}$  (M+H): 326.0629, found: 326.0619. IR:  $\nu$  3364, 2965, 2924, 2870, 1620, 1510, 1456, 1241, 1089, 1010, 735, 696, 578, 539, 428  $\text{cm}^{-1}$ .

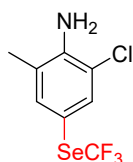

**5au**, (2-chloro-6-methyl-4-((trifluoromethyl)selanyl)aniline), light yellow solid (99%), m.p. 59.0-59.6 °C,  $^1\text{H}$  NMR (400 MHz, Chloroform-*d*)  $\delta$  7.56 – 7.51 (m, 1H), 7.33 (d,  $J = 1.9$  Hz, 1H), 4.26 (s, 2H), 2.20 (s, 3H);  $^{19}\text{F}$  NMR (376 MHz, Chloroform-*d*)  $\delta$  -37.39 (s, 3F);  $^{13}\text{C}$  NMR (101 MHz, Chloroform-*d*)  $\delta$  143.45, 137.72, 135.81, 124.10, 123.96, 122.45 (q,  $J = 333.6$  Hz), 120.79, 118.90, 108.85, 77.24, 17.72. HRMS-ESI ( $m/z$ ) calcd for  $\text{C}_8\text{H}_8\text{ClF}_3\text{NSe}$  (M+H): 289.9457, found: 289.9407. IR:  $\nu$  3486, 3385, 2980, 2919, 2861, 1614, 1558, 1473, 1444, 1398, 1082, 871, 835, 733, 724, 707, 575, 480, 460, 429  $\text{cm}^{-1}$ .

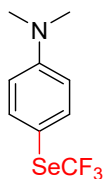

**5av**, (N,N-dimethyl-4-((trifluoromethyl)selanyl)aniline), light yellow solid (91%), m.p. 45.8-46.2 °C,  $^1\text{H}$  NMR (400 MHz, Chloroform-*d*)  $\delta$  7.63 – 7.52 (m, 2H), 6.73 (d,  $J = 8.4$  Hz, 2H), 3.01 (s, 6H);  $^{19}\text{F}$  NMR (376 MHz, Chloroform-*d*)  $\delta$  -37.71 (s, 3F);  $^{13}\text{C}$  NMR (101 MHz, Chloroform-*d*)  $\delta$  151.71, 138.75, 124.41, 121.09, 112.73, 119.43 (q,  $J = 333.9$  Hz), 107.16, 40.19. IR:  $\nu$  2921, 2898, 2824, 1590, 1507, 1442, 1368, 1228, 1198, 1125, 1090, 1078, 947, 807, 733, 510, 481  $\text{cm}^{-1}$ .

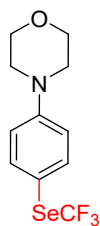

**5aw**, (4-(4-((trifluoromethyl)selanyl)phenyl)morpholine), light yellow solid (94%), m.p. 42.9-43.2 °C,  $^1\text{H}$  NMR (400 MHz, Chloroform-*d*)  $\delta$  7.65 – 7.56 (m, 2H), 6.92 – 6.83 (m, 2H), 3.91 – 3.79 (m, 4H), 3.31 – 3.16 (m, 4H);  $^{19}\text{F}$  NMR (376 MHz, Chloroform-*d*)  $\delta$  -37.27 (s, 3F);  $^{13}\text{C}$  NMR (101 MHz, Chloroform-*d*)  $\delta$  152.60, 138.70, 122.26 (q,  $J = 333.5$  Hz), 115.74, 111.23, 66.76, 48.24. IR:  $\nu$  2960, 2902, 2865, 2835, 1587, 1500, 1447, 1413, 1380, 1343, 1305, 1286, 1262, 1092, 1049, 923, 834, 817, 734, 658, 552, 543, 527, 410  $\text{cm}^{-1}$ .

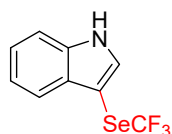

**5axa**, (3-((trifluoromethyl)selanyl)-1H-indole), light brown solid (89%), m.p. 60.3-60.8 °C,  $^1\text{H}$  NMR (400 MHz, Chloroform-*d*)  $\delta$  8.56 (s, 1H), 7.79 – 7.75 (m, 1H), 7.53 (d,  $J = 2.6$  Hz, 2H), 7.46 – 7.43 (m, 1H), 7.29 (td,  $J = 5.0, 4.6, 2.0$  Hz, 2H);  $^{19}\text{F}$  NMR (376 MHz, Chloroform-*d*)  $\delta$  -37.63 (s, 3F);  $^{13}\text{C}$  NMR (101 MHz, Chloroform-*d*)  $\delta$  136.16, 133.00, 130.14, 123.46, 121.62, 121.41 (q,  $J = 335.2$  Hz), 120.18, 111.65, 93.32. IR:  $\nu$  3390, 2956, 2922, 2852, 1499, 1454, 1406, 1336, 1278, 1237, 1087, 1006, 982, 840, 746, 734, 620, 580, 540, 530, 447, 424  $\text{cm}^{-1}$ .

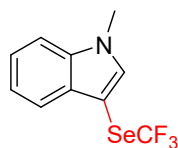

**5axb**, (3-((trifluoromethyl)selanyl)-1H-indole), white solid (98%), m.p. 66.0-66.5 °C,  $^1\text{H}$  NMR (400 MHz, Chloroform-*d*)  $\delta$  7.75 (d,  $J = 7.7$  Hz, 1H), 7.42 – 7.36 (m, 2H), 7.32 (ddd,  $J = 14.1, 6.4, 1.3$  Hz, 1H), 3.86 (s, 3H);  $^{19}\text{F}$  NMR (376 MHz, Chloroform-*d*)  $\delta$  -38.00 (s, 3F);  $^{13}\text{C}$  NMR (101 MHz, Chloroform-*d*)  $\delta$  137.36, 137.20, 130.90, 122.95, 122.41 (q,  $J = 335.6$  Hz), 121.23, 120.27, 109.86, 90.91, 33.29. IR:  $\nu$  3365, 2945, 2924, 2821, 1510, 1481, 1456, 1333, 1323, 1241, 1113, 1087, 1009, 818, 737, 696, 596, 577, 539, 524, 428  $\text{cm}^{-1}$ .

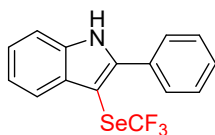

**5axc**, (2-phenyl-3-((trifluoromethyl)selanyl)-1H-indole), light yellow solid (98%), m.p. 96.3-97.0 °C,  $^1\text{H}$  NMR (400 MHz, Chloroform-*d*)  $\delta$  8.63 (s, 1H), 7.87 – 7.79 (m, 1H), 7.77 – 7.73 (m, 2H), 7.53 – 7.45 (m, 4H), 7.32 – 7.29 (m, 2H);  $^{19}\text{F}$  NMR (376 MHz, Chloroform-*d*)  $\delta$  -36.63 (s, 3F);  $^{13}\text{C}$  NMR (101 MHz, Chloroform-*d*)  $\delta$  144.18, 135.85, 132.22, 131.44, 129.28, 129.15, 128.84, 123.73, 122.49 (q,  $J = 336.5$  Hz), 121.79, 120.76, 111.26. IR:  $\nu$  3363, 2965, 2923, 2859, 1716, 1483, 1455, 1444, 1396, 1346, 1324, 1296, 1224, 1115, 1087, 767, 749, 734, 694, 584, 568, 544, 428  $\text{cm}^{-1}$ .

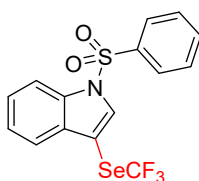

**5axd**, (1-(phenylsulfonyl)-3-((trifluoromethyl)selanyl)-1H-indole), white solid (83%), m.p. 152.0-152.7 °C,  $^1\text{H}$  NMR (400 MHz, Chloroform-*d*)  $\delta$  7.99 (dd,  $J = 7.8, 1.3$  Hz, 1H), 7.96 – 7.89 (m, 3H), 7.70 – 7.65 (m, 1H), 7.61 – 7.55 (m, 1H), 7.48 (dd,  $J = 8.5, 7.2$  Hz, 2H), 7.44 – 7.32 (m, 2H);  $^{19}\text{F}$  NMR (376 MHz, Chloroform-*d*)  $\delta$  -36.15 (s, 3F);  $^{13}\text{C}$  NMR (101 MHz, Chloroform-*d*)  $\delta$  137.76, 134.94, 134.53, 134.07, 132.06, 129.67, 127.07, 125.91, 124.46, 123.00 (q,  $J = 334.8$  Hz), 121.08, 113.62. HRMS-ESI ( $m/z$ ) calcd for  $\text{C}_{15}\text{H}_{11}\text{F}_3\text{NO}_2\text{SSe}$  ( $\text{M}+\text{H}$ ): 405.9622, found: 405.9560. IR:  $\nu$  3130, 2957, 2923, 2852, 1517, 1472, 1424, 1366, 1265, 1174, 1117, 1087, 1036, 933, 841, 755, 745, 725, 682, 584, 569, 549, 425  $\text{cm}^{-1}$ .

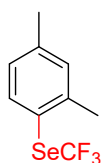

**5ay**, ((2,4-dimethylphenyl)(trifluoromethyl)selane), colorless transparent oil (84%),  $^1\text{H}$ NMR (400 MHz, Chloroform-*d*)  $\delta$  7.64 (d,  $J = 7.8$  Hz, 1H), 7.19 – 7.15 (m, 1H), 7.03 – 6.96 (m, 1H), 2.52 (s, 3H), 2.35 (s, 3H);  $^{19}\text{F}$  NMR (376 MHz, Chloroform-*d*)  $\delta$  -35.96 (s, 3F);  $^{13}\text{C}$  NMR (101 MHz, Chloroform-*d*)  $\delta$  143.47, 141.59, 139.21, 131.68, 127.92, 122.85 (q,  $J = 333.4$  Hz), 121.20, 23.42, 21.36. HRMS-ESI ( $m/z$ ) calcd for  $\text{C}_9\text{H}_{10}\text{F}_3\text{Se}$  ( $\text{M}+\text{H}$ ): 254.9894, found: 254.9894. IR:  $\nu$  3423, 2967, 2923, 2851, 1617, 1593, 1565, 1507, 1462, 1437, 1382, 1347, 1196, 1118, 1082, 1028, 823, 769, 751, 737, 644, 543, 487, 416  $\text{cm}^{-1}$ .

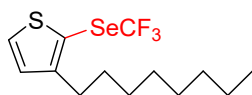

**5aza**, (3-octyl-2-((trifluoromethyl)selanyl)thiophene), colorless transparent oil (86%),  $^1\text{H NMR}$  (400 MHz, Chloroform-*d*)  $\delta$  7.53 (d,  $J = 5.4$  Hz, 1H), 7.03 (d,  $J = 5.4$  Hz, 1H), 2.85 – 2.73 (m, 2H), 1.58 (t,  $J = 7.6$  Hz, 2H), 1.34 – 1.26 (m, 10H), 0.92 – 0.84 (m, 3H);  $^{19}\text{F NMR}$  (376 MHz, Chloroform-*d*)  $\delta$  -37.76 (s, 3F);  $^{13}\text{C NMR}$  (101 MHz, Chloroform-*d*)  $\delta$  152.64, 132.97, 129.10, 122.05 (q,  $J = 337.1$  Hz), 111.72, 32.01, 30.88, 30.23, 29.53, 29.50, 29.36, 22.82, 14.25. HRMS-ESI ( $m/z$ ) calcd for  $\text{C}_{13}\text{H}_{19}\text{F}_3\text{NaSSe}$  ( $\text{M}+\text{Na}$ ): 367.0217, found: 367.0217. IR:  $\nu$  2969, 2924, 2858, 1745, 1658, 1588, 1552, 1502, 1464, 1378, 1338, 1301, 1252, 1229, 1138, 1085, 839, 736, 528  $\text{cm}^{-1}$ .

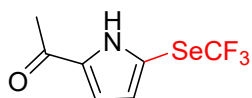

**5azb**, 1-(5-((trifluoromethyl)selanyl)-1H-pyrrol-2-yl)ethan-1-one, colorless solid,  $^1\text{H NMR}$  (400 MHz, Chloroform-*d*)  $\delta$  10.36 (s, 1H), 7.30 (dd,  $J = 3.0, 1.4$  Hz, 1H), 7.11 (dd,  $J = 2.3, 1.4$  Hz, 1H), 2.47 (s, 3H);  $^{19}\text{F NMR}$  (376 MHz, Chloroform-*d*)  $\delta$  -38.16 (s, 3F);  $^{13}\text{C NMR}$  (101 MHz, Chloroform-*d*)  $\delta$  188.43, 133.41, 132.14, 123.74, 122.07 (q,  $J = 335.3$  Hz), 120.41, 100.25, 25.69. HRMS-ESI ( $m/z$ ) calcd for  $\text{C}_7\text{H}_6\text{F}_3\text{NNaOSe}$  ( $\text{M}+\text{Na}$ ): 279.9464, found: 279.9460. IR:  $\nu$  3056, 2958, 1730, 1656, 1585, 1140, 1100, 829, 728, 530  $\text{cm}^{-1}$ .

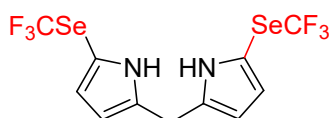

**5azc**, bis(5-((trifluoromethyl)selanyl)-1H-pyrrol-2-yl)methane, colorless solid,  $^1\text{H NMR}$  (400 MHz, Chloroform-*d*)  $\delta$  8.72 (s, 2H), 6.84 (d,  $J = 2.6$  Hz, 2H), 4.37 (s, 2H), 1.66 (s, 2H).  $^{19}\text{F NMR}$  (376 MHz, Chloroform-*d*)  $\delta$  -37.54 (d,  $J = 52.64$  Hz, 3F).  $^{13}\text{C NMR}$  (101 MHz, Chloroform-*d*)  $\delta$  139.89, 129.40, 122.23 (q,  $J = 335.3$  Hz), 121.76 (q,  $J = 335.3$  Hz), 110.34, 106.75, 100.13, 29.85, 24.62. HRMS-ESI ( $m/z$ ) calcd for  $\text{C}_{11}\text{H}_8\text{F}_6\text{N}_2\text{NaSe}_2$  ( $\text{M}+\text{Na}$ ): 464.8820, found: 464.8822. IR:  $\nu$  3067, 2960, 2858, 1650, 1150, 1120, 834, 731  $\text{cm}^{-1}$ .

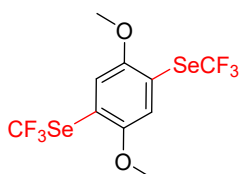



**5ba**, ((2,5-dimethoxy-1,4-phenylene)bis((trifluoromethyl)selane)), white solid (95%), m.p. 107.1-107.5 °C,  $^1\text{H}$  NMR (400 MHz, Chloroform-*d*)  $\delta$  7.24 (s, 2H), 3.87 (s, 6H);  $^{19}\text{F}$  NMR (376 MHz, Chloroform-*d*)  $\delta$  -34.61 (s, 6F);  $^{13}\text{C}$  NMR (101 MHz, Chloroform-*d*)  $\delta$  153.20, 122.61 (q,  $J = 333.1$  Hz), 118.80, 115.89, 57.04. HRMS-ESI ( $m/z$ ) calcd for  $\text{C}_{10}\text{H}_8\text{F}_6\text{NaO}_2\text{Se}_2$  ( $\text{M}+\text{Na}$ ): 456.8651, found: 456.8645. IR:  $\nu$  2974, 2947, 2848, 1479, 1461, 1434, 1350, 1270, 1212, 1095, 1064, 1019, 867, 756, 736, 644, 523, 460  $\text{cm}^{-1}$ .

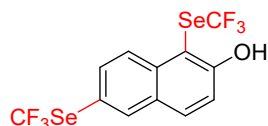

**5bb**, (1,6-bis((trifluoromethyl)selanyl)naphthalen-2-ol), light yellow solid (83%), m.p. 89.2-89.7 °C,  $^1\text{H}$  NMR (400 MHz, Chloroform-*d*)  $\delta$  8.31 (d,  $J = 8.8$  Hz, 1H), 8.23 (d,  $J = 1.8$  Hz, 1H), 7.95 (d,  $J = 8.9$  Hz, 1H), 7.87 (dd,  $J = 8.8, 1.8$  Hz, 1H), 7.41 (d,  $J = 8.9$  Hz, 1H), 6.95 (s, 1H);  $^{19}\text{F}$  NMR (376 MHz, Chloroform-*d*)  $\delta$  -34.45 (s, 3F), -35.89 (s, 3F);  $^{13}\text{C}$  NMR (101 MHz, Chloroform-*d*)  $\delta$  158.69, 138.02, 136.76, 135.52, 134.80, 129.78, 128.06, 122.66 (q,  $J = 333.2$  Hz), 121.92 (q,  $J = 336.9$  Hz), 118.14, 118.04, 103.98. HRMS-ESI ( $m/z$ ) calcd for  $\text{C}_{12}\text{H}_7\text{F}_6\text{OSe}_2$  ( $\text{M}+\text{H}$ ): 440.8726, found: 440.8726. IR:  $\nu$  3433, 2957, 2924, 2852, 1612, 1584, 1494, 1457, 1403, 1383, 1349, 1213, 1160, 1142, 1130, 1070, 930, 901, 822, 734, 664, 567, 525, 515, 414  $\text{cm}^{-1}$ .

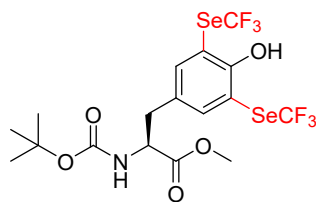

**5bc**, (methyl(S)-2-((tert-butoxycarbonyl)amino)-3-(4-hydroxy-3,5-is((trifluoromethyl)selanyl)phenyl)propanoate), white solid (38%), m.p. 113.0-113.4 °C,  $^1\text{H}$  NMR (400 MHz, Chloroform-*d*)  $\delta$  7.56 (s, 2H), 6.66 (s, 1H), 5.05 (d,  $J = 7.7$  Hz, 1H), 4.57 (d,  $J = 6.9$  Hz, 1H), 3.72 (s, 3H), 3.17-3.01 (m, 2H), 1.44 (s, 9H);  $^{19}\text{F}$  NMR (376 MHz, Chloroform-*d*)  $\delta$  -35.08 (s, 6F);  $^{13}\text{C}$  NMR (101 MHz, Chloroform-*d*)  $\delta$  171.73, 156.79, 155.03, 142.81, 130.61, 122.15 (q,  $J = 334.4$  Hz), 109.90, 54.33, 52.55, 36.81, 28.36. HRMS-ESI ( $m/z$ ) calcd for  $\text{C}_{17}\text{H}_{19}\text{F}_6\text{NNaO}_5\text{Se}_2$  ( $\text{M}+\text{Na}$ ): 613.9390, found: 613.9390. IR:  $\nu$  3420, 3350, 2992, 2956, 2920, 1732, 1682, 1525, 1450, 1317, 1280, 1149, 1128, 1086, 1066, 998, 854, 803, 762, 734, 637, 485, 462, 409  $\text{cm}^{-1}$ .

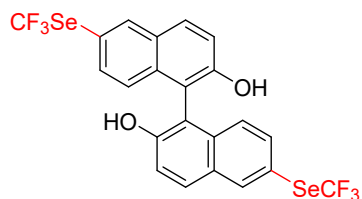

**5bd**, (6,6'-bis((trifluoromethyl)selanyl)-[1,1'-binaphthalene]-2,2'-diol), light yellow solid (93%), m.p. 80.4-80.8 °C,  $^1\text{H}$  NMR (400 MHz, Chloroform-*d*)  $\delta$  8.34 (d,  $J = 1.8$  Hz, 2H), 8.02 (d,  $J = 9.0$  Hz, 2H), 7.60 (dd,  $J = 8.7, 1.8$  Hz, 2H), 7.46 (d,  $J = 9.0$  Hz, 2H), 7.12 (d,  $J = 8.7$  Hz, 2H), 5.13 (s, 2H);  $^{19}\text{F}$  NMR (376 MHz, Chloroform-*d*)  $\delta$  -35.91 (s, 6F);  $^{13}\text{C}$  NMR (101 MHz, Chloroform-*d*)  $\delta$  154.39, 138.20, 134.93, 134.05, 132.13, 129.89, 125.47, 122.67 (q,  $J = 334.2$  Hz), 119.17, 117.99, 110.58. HRMS-ESI ( $m/z$ ) calcd for  $\text{C}_{22}\text{H}_{13}\text{F}_6\text{O}_2\text{Se}_2$  ( $\text{M}+\text{H}$ ): 582.9145, found: 582.9145. IR:  $\nu$  3495, 2953, 2928, 2857, 1705, 1611, 1585, 1492, 1464, 1381, 1346, 1273, 1217, 1120, 1089, 1068, 966, 930, 892, 816, 753, 737, 673, 556, 422  $\text{cm}^{-1}$ .

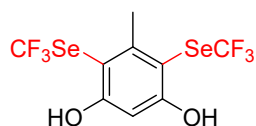

**5be**, (5-methyl-4,6-bis((trifluoromethyl)selanyl)benzene-1,3-diol), white solid (71%), m.p. 57.9-58.5 °C,  $^1\text{H}$  NMR (400 MHz, Chloroform-*d*)  $\delta$  6.78 (s, 2H), 6.75 (s, 1H), 2.92 (s, 3H);  $^{19}\text{F}$  NMR (376 MHz, Chloroform-*d*)  $\delta$  -35.72 (s, 6F);  $^{13}\text{C}$  NMR (101 MHz, Chloroform-*d*)  $\delta$  161.93, 152.46, 123.59, 121.92 (q,  $J = 336.6$  Hz), 120.24, 104.48, 99.88, 26.53. HRMS-ESI ( $m/z$ ) calcd for  $\text{C}_9\text{H}_7\text{F}_6\text{O}_2\text{Se}_2$  ( $\text{M}+\text{H}$ ): 420.8675, found: 420.8675. IR:  $\nu$  3431, 3084, 2953, 2923, 2853, 1589, 1562, 1435, 1415, 1338, 1308, 1234, 1149, 1122, 1074, 856, 736, 600, 488  $\text{cm}^{-1}$ .

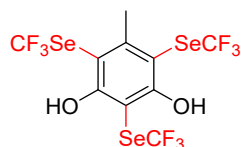

**5bf**, (5-methyl-2,4,6-tris((trifluoromethyl)selanyl)benzene-1,3-diol), white solid (95%), m.p. 71.0-72.0 °C,  $^1\text{H}$  NMR (400 MHz, Chloroform-*d*)  $\delta$  7.38 (s, 2H), 2.98 (s, 3H);  $^{19}\text{F}$  NMR (376 MHz, Chloroform-*d*)  $\delta$  -34.84 (s, 3F), -35.52 (s, 6F);  $^{13}\text{C}$  NMR (101 MHz, Chloroform-*d*)  $\delta$  162.94, 156.83, 122.08 (q,  $J = 336.2$  Hz), 121.93 (q,  $J = 336.4$  Hz), 104.04, 94.70, 27.26. HRMS-ESI ( $m/z$ ) calcd for  $\text{C}_{10}\text{H}_5\text{F}_9\text{NaO}_2\text{Se}_3$  ( $\text{M}+\text{Na}$ ): 590.7534, found: 590.7534. IR:  $\nu$  3411, 3357, 2968, 2929, 1552, 1535, 1419,

1368, 1338, 1306, 1107, 1070, 1007, 752, 737, 668, 636, 583, 529  $\text{cm}^{-1}$ .

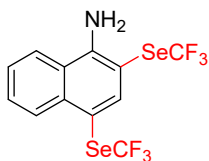

**5bg**, (2,4-bis((trifluoromethyl)selanyl)naphthalen-1-amine), light yellow solid (94%), m.p. 99.4-99.9  $^{\circ}\text{C}$ ,  $^1\text{H}$  NMR (400 MHz, Chloroform-*d*)  $\delta$  8.49 (d,  $J = 8.5$  Hz, 1H), 8.26 (s, 1H), 7.86 (dt,  $J = 8.4, 0.8$  Hz, 1H), 7.72-7.67 (m, 1H), 7.60-7.56 (m, 1H), 5.46 (s, 2H).;  $^{19}\text{F}$  NMR (376 MHz, Chloroform-*d*)  $\delta$  -35.48 (s, 3F), -36.73 (s, 3F);  $^{13}\text{C}$  NMR (126 MHz, Chloroform-*d*)  $\delta$  150.16, 148.11, 137.53, 129.41, 129.39, 126.58, 123.91, 122.96, 122.58 (q,  $J = 336.0$  Hz), 122.53 (q,  $J = 336.0$  Hz), 121.19, 110.09, 100.28. HRMS-ESI ( $m/z$ ) calcd for  $\text{C}_{12}\text{H}_8\text{F}_6\text{NSe}_2$  ( $\text{M}+\text{H}$ ): 439.8886, found: 439.8835. IR:  $\nu$  3523, 3400, 2952, 2923, 1612, 1558, 1498, 1424, 1381, 1363, 1156, 1146, 1087, 1038, 777, 754, 734, 667, 528, 419  $\text{cm}^{-1}$ .

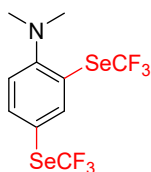

**5bh**, (N,N-dimethyl-2,4-bis((trifluoromethyl)selanyl)aniline), light yellow oil (90%),  $^1\text{H}$  NMR (400 MHz, Chloroform-*d*)  $\delta$  7.96 (d,  $J = 1.9$  Hz, 1H), 7.67 (dd,  $J = 8.3, 2.0$  Hz, 1H), 7.17 (d,  $J = 8.3$  Hz, 1H), 2.78 (s, 6H);  $^{19}\text{F}$  NMR (376 MHz, Chloroform-*d*)  $\delta$  -35.56 (s, 3F), -36.40 (s, 3F);  $^{13}\text{C}$  NMR (101 MHz, Chloroform-*d*)  $\delta$  155.45, 141.27, 138.16, 123.08 (q,  $J = 333.3$  Hz), 122.40 (q,  $J = 333.3$  Hz), 121.56, 120.88, 117.95, 110.85, 44.98. HRMS-ESI ( $m/z$ ) calcd for  $\text{C}_{10}\text{H}_{10}\text{F}_6\text{NSe}_2$  ( $\text{M}+\text{H}$ ): 417.9042, found: 417.9033. IR:  $\nu$  2991, 2948, 2870, 2837, 2793, 1572, 1477, 1454, 1434, 1378, 1321, 1266, 1120, 1088, 1042, 939, 825, 737, 674, 598, 577, 512, 460, 428  $\text{cm}^{-1}$ .

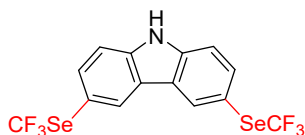

**5bi**, (3,6-bis((trifluoromethyl)selanyl)-9H-carbazole), light yellow solid (79%), m.p. 157.7-158.7  $^{\circ}\text{C}$ ,  $^1\text{H}$  NMR (400 MHz, Chloroform-*d*)  $\delta$  8.50 (d,  $J = 1.9$  Hz, 2H), 8.36 (s, 1H), 7.83 (dd,  $J = 8.5, 1.7$  Hz, 2H), 7.48 (d,  $J = 8.4$  Hz, 2H);  $^{19}\text{F}$  NMR (376 MHz, Chloroform-*d*)  $\delta$  -37.03 (s, 6F);  $^{13}\text{C}$  NMR (101 MHz,

Chloroform-*d*)  $\delta$  140.60, 135.59, 130.50, 124.44, 123.87, 121.12, 112.89, 112.01. 140.60, 135.59, 130.50, 124.44, 123.87, 121.12, 112.89, 122.78 (q,  $J = 333.3$  Hz), 112.01. HRMS-ESI ( $m/z$ ) calcd for  $C_{14}H_8F_6NSe_2$  ( $M+H$ ): 463.8886, found: 463.8886. IR:  $\nu$  3490, 2967, 2924, 2850, 1597, 1466, 1430, 1288, 1242, 1110, 1082, 1053, 886, 809, 732, 574, 524, 410  $cm^{-1}$ .

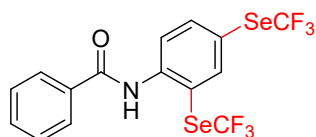

**5bj**, (N-(2,4-bis((trifluoromethyl)selanyl)phenyl)benzamide), white solid (66%), m.p. 140.0-140.9 °C,  $^1H$  NMR (400 MHz, Chloroform-*d*)  $\delta$  9.13 (s, 1H), 8.79 (d,  $J = 8.7$  Hz, 1H), 8.22 (d,  $J = 2.0$  Hz, 1H), 7.95-7.91 (m, 3H), 7.67 – 7.59 (m, 1H), 7.55 (dd,  $J = 8.2, 6.6$  Hz, 2H);  $^{19}F$  NMR (376 MHz, Chloroform-*d*)  $\delta$  -34.87 (s, 3F), -36.28 (s, 3F);  $^{13}C$  NMR (101 MHz, Chloroform-*d*)  $\delta$  165.46, 147.79, 142.87, 142.00, 134.10, 132.80, 129.28, 127.21, 122.40 (q,  $J = 333.2$  Hz), 122.01 (q,  $J = 335.1$  Hz), 121.56, 117.39, 113.33. HRMS-ESI ( $m/z$ ) calcd for  $C_{15}H_9F_6NNaOSe_2$  ( $M+Na$ ): 515.8811, found: 515.8811. IR:  $\nu$  3311, 1658, 1562, 1505, 1491, 1372, 1296, 1179, 1155, 1122, 1071, 901, 836, 798, 738, 709, 688, 631, 598, 562, 461  $cm^{-1}$ .

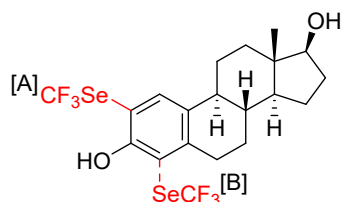

**5ca**, ([A]: (8R,9S,13S,14S,17S)-13-methyl-2-((trifluoromethyl)selanyl)-7,8,9,11,12,13,14,15,16,17-decahydro-6H-cyclopenta[a]phenanthrene-3,17-diol; [B]: (8R,9S,13S, 14S,17S)-13-methyl-4-((trifluoromethyl)selanyl)-7,8,9,11,12,13,14,15,16,17-decahydro-6H-cyclopenta[a]phenanthrene-3,17-diol), white solid (85%), m.p. 83.4-84.1 °C, [A]:[B] = 4:1,  $^1H$  NMR (400 MHz, Chloroform-*d*)  $\delta$  7.53 (s, 1H), 6.82 (s, 1H), 5.97 (s, 1H), 3.77 – 3.68 (m, 1H), 2.87 (dd,  $J = 8.8, 4.3$  Hz, 2H), 2.34 – 2.25 (m, 2H), 2.22-2.08 (m, 3H), 2.02 – 1.83 (m, 3H), 1.75-1.66 (m, 2H), 1.57 – 1.15 (m, 16H), 0.80 – 0.77 (m, 4H). 7.39 (d,  $J = 8.6$  Hz, 0.25H), 6.94 (d,  $J = 8.6$  Hz, 0.25H), 6.35 (s, 0.25H);  $^{19}F$  NMR (376 MHz, Chloroform-*d*)  $\delta$  -34.39 (s, 3F). -36.03 (s, 3F);  $^{13}C$  NMR (101 MHz, Chloroform-*d*)  $\delta$  154.97, 143.62, 135.91, 134.19, 122.07 (q,  $J = 335.1$  Hz), 115.54, 112.80, 106.02, 81.90, 50.02, 44.26, 43.68, 43.27, 38.53, 38.08, 36.72, 36.60, 31.90, 30.51, 29.68, 27.42, 26.96, 26.55, 26.30, 23.16, 23.12, 11.16.

HRMS-ESI (m/z) calcd for C<sub>19</sub>H<sub>24</sub>F<sub>3</sub>O<sub>2</sub>Se (M+H): 421.0888, found: 421.0888. IR:  $\nu$  2920, 2870, 1597, 1469, 1407, 1340, 1263, 1207, 1125, 1092, 1054, 1010, 892, 870, 755, 737, 667 cm<sup>-1</sup>.

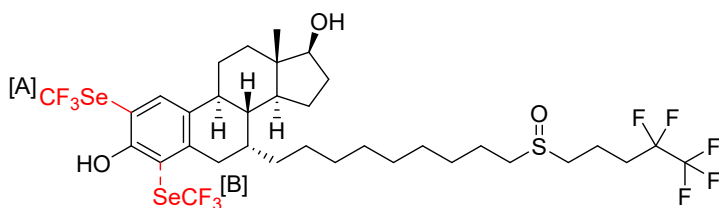

**5cb**, ([A]: (7R,8R,9S,13S,14S,17S)-13-methyl-7-(9-((4,4,5,5,5-pentafluoropentyl)sulfinyl)nonyl)-2-((trifluoromethyl)selanyl)-7,8,9,11,12,13,14,15,16,17-decahydro-6H-cyclopenta[a]phenanthrene-3,17-diol; [B]: (7R,8R,9S,13S,14S,17S)-13-methyl-7-(9-((4,4,5,5,5-pentafluoropentyl)sulfinyl)nonyl)-4-((trifluoromethyl)selanyl)-7,8,9,11,12,13,14,15,16,17-decahydro-6H-cyclopenta[a]phenanthrene-3,17-diol), lightyellow solid (66%), m.p. 73.1-73.4 °C, [A]:[B] = 2:1, <sup>1</sup>H NMR (400 MHz, Chloroform-*d*)  $\delta$  7.53 (s, 1H), 7.39 (d, *J* = 8.6 Hz, 1H), 6.94 (d, *J* = 8.6 Hz, 1H), 6.79 (d, *J* = 3.3 Hz, 1H), 3.82 – 3.68 (m, 2H), 3.27 (d, *J* = 17.5 Hz, 1H), 2.92 – 2.65 (m, 9H), 2.37 – 2.14 (m, 11H), 1.92 (d, *J* = 12.4 Hz, 2H), 1.73 – 1.13 (m, 52H), 0.97 (dd, *J* = 17.8, 8.2 Hz, 2H), 0.78 (d, *J* = 1.3 Hz, 5H); <sup>19</sup>F NMR (376MHz, Chloroform-*d*)  $\delta$  -34.53, -35.93, -85.43, -118.11, -118.18; <sup>13</sup>C NMR (101 MHz, Chloroform-*d*)  $\delta$  156.00, 155.24, 141.49, 136.41, 133.04, 131.43, 122.21 (q, *J* = 333.3 Hz), 122.06 (q, *J* = 333.7 Hz), 116.51, 113.01, 106.36, 81.88, 52.58, 52.50, 50.86, 46.46, 46.43, 43.40, 41.80, 41.78, 41.32, 38.46, 37.91, 37.86, 36.96, 36.84, 36.62, 34.70, 33.50, 33.14, 33.09, 30.54, 30.46, 29.92, 29.85, 29.75, 29.64, 29.58, 29.55, 29.43, 29.31, 29.22, 29.19, 29.16, 28.98, 28.82, 28.09, 27.96, 27.74, 27.58, 27.24, 25.82, 25.64, 25.49, 22.65, 14.73, 14.69, 11.17. HRMS-ESI (m/z) calcd for C<sub>33</sub>H<sub>46</sub>F<sub>8</sub>NaO<sub>3</sub>SSe (M+Na): 777.2097, found: 777.2092. IR:  $\nu$  2923, 2856, 1598, 1542, 1454, 1410, 1350, 1266, 1193, 1121, 1094, 1057, 1016, 984, 754, 737, 721, 525, 516, 462, 427, 409 cm<sup>-1</sup>.

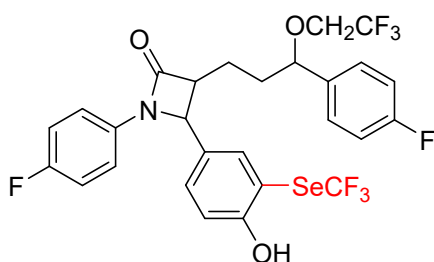

**5cc**, (1-(4-fluorophenyl)-3-(3-(4-fluorophenyl)-3-(2,2,2-trifluoroethoxy)propyl)-4-(4-hydroxy-3-((trifluoromethyl)selanyl)phenyl)azetidin-2-one), light yellow viscous oil (94%), <sup>1</sup>H NMR (400 MHz,

Chloroform-*d*)  $\delta$  7.62 (dd,  $J = 5.1, 2.3$  Hz, 1H), 7.38 (ddd,  $J = 8.4, 2.3, 1.1$  Hz, 1H), 7.26 – 7.17 (m, 4H), 7.11 (d,  $J = 8.5$  Hz, 1H), 7.09 – 7.02 (m, 2H), 6.97 – 6.88 (m, 2H), 6.27 (s, 1H), 4.57 (dd,  $J = 14.4, 2.4$  Hz, 1H), 4.42 (p,  $J = 5.2$  Hz, 1H), 3.73 – 3.50 (m, 2H), 3.22 – 3.03 (m, 1H), 2.13 – 1.81 (m, 4H);  $^{19}\text{F}$  NMR (376 MHz, Chloroform-*d*)  $\delta$  -35.53 (d,  $J = 4.1$  Hz, 3F), -73.94 (d,  $J = 14.9$  Hz, 3F), -113.39 (d,  $J = 6.3$  Hz, 1F), -117.70 (d,  $J = 3.3$  Hz, 1F);  $^{13}\text{C}$  NMR (101 MHz, Chloroform-*d*)  $\delta$  167.43, 167.35, 163.96, 161.51, 160.43, 158.01, 157.80, 136.49, 135.74, 133.55, 131.13, 131.10, 130.44, 130.38, 128.41, 128.34, 128.27, 124.00 (q,  $J = 280.17$  Hz), 121.89 (q,  $J = 336.1$  Hz), 118.60, 118.52, 116.94, 116.10, 115.98, 115.88, 115.77, 109.89, 82.60, 82.49, 65.99, 65.65, 60.47, 60.32, 60.23, 60.13, 35.69, 35.17, 25.16, 24.70. HRMS-ESI(*m/z*) calcd for  $\text{C}_{27}\text{H}_{21}\text{F}_8\text{NNaO}_3\text{Se}$  ( $\text{M}+\text{Na}$ ): 662.0451, found: 662.0443. IR:  $\nu$  2925, 1718, 1605, 1508, 1424, 1388, 1335, 1276, 1223, 1144, 1119, 1091, 1045, 969, 832, 738, 669, 565, 547, 516, 459, 427, 411  $\text{cm}^{-1}$ .

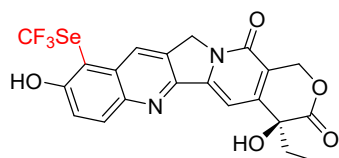

**5cd**, ((*S*)-4-ethyl-4,9-dihydroxy-10-((trifluoromethyl)selanyl)-1,12-dihydro-14H-pyrano[3',4':6,7]indolizino[1,2-b]quinoline-3,14(4H)-dione), light yellow solid (80%), m.p. 181.2-181.9 °C,  $^1\text{H}$  NMR (400 MHz,  $\text{DMSO-}d_6$ )  $\delta$  11.37 (s, 1H), 8.98 (s, 1H), 8.23 (d,  $J = 9.2$  Hz, 1H), 7.69 (d,  $J = 9.2$  Hz, 1H), 7.27 (s, 1H), 6.51 (s, 1H), 5.41 (s, 2H), 5.30 (s, 2H), 1.99 – 1.75 (m, 2H), 0.88 (t,  $J = 7.3$  Hz, 3H);  $^{19}\text{F}$  NMR (376 MHz,  $\text{DMSO-}d_6$ )  $\delta$  -34.88 (s, 3F);  $^{13}\text{C}$  NMR (101 MHz,  $\text{DMSO-}d_6$ )  $\delta$  172.59, 159.89, 156.71, 149.87, 149.66, 145.17, 143.69, 134.48, 132.19, 131.29, 129.72, 122.80 (q,  $J = 335.5$  Hz), 122.16, 118.48, 103.10, 96.29, 72.38, 65.28, 50.48, 30.37, 7.78. HRMS-ESI (*m/z*) calcd for  $\text{C}_{21}\text{H}_{16}\text{F}_3\text{N}_2\text{O}_5\text{Se}$  ( $\text{M}+\text{H}$ ): 513.0171, found: 513.0169. IR:  $\nu$  2970, 2925, 1747, 1656, 1581, 1556, 1476, 1381, 1330, 1242, 1144, 1097, 1049, 1004, 841, 756, 735, 727, 532, 429, 412  $\text{cm}^{-1}$ .

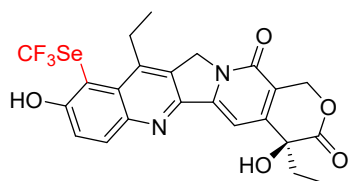

**5ce**, ((*S*)-4,11-diethyl-4,9-dihydroxy-10-((trifluoromethyl)selanyl)-1,12-dihydro-14H-pyrano[3',4':6,7]indolizino[1,2-b]quinoline-3,14(4H)-dione), yellow solid (77%), m.p. 189.1-189.6 °C,  $^1\text{H}$

NMR (400 MHz, DMSO-*d*<sub>6</sub>)  $\delta$  11.35 (s, 1H), 8.22 (d, *J* = 9.1 Hz, 1H), 7.67 (d, *J* = 9.2 Hz, 1H), 7.24 (s, 1H), 6.52 (s, 1H), 5.42 (s, 2H), 5.33 (s, 2H), 3.68-3.59 (m, 2H), 1.91-1.80 (m, 2H), 1.33 (t, *J* = 7.4 Hz, 3H), 0.87 (t, *J* = 7.3 Hz, 3H); <sup>19</sup>F NMR (376 MHz, DMSO-*d*<sub>6</sub>)  $\delta$  -35.75 (s, 3F); <sup>13</sup>C NMR (101 MHz, DMSO-*d*<sub>6</sub>)  $\delta$  172.59, 160.72, 156.76, 150.07, 148.66, 145.97, 145.42, 144.80, 136.35, 132.00, 130.25, 122.69 (q, *J* = 337.7 Hz), 121.16, 118.41, 100.66, 96.04, 72.43, 65.29, 50.25, 30.31, 24.97, 13.63, 7.78. HRMS-ESI (*m/z*) calcd for C<sub>23</sub>H<sub>20</sub>F<sub>3</sub>N<sub>2</sub>O<sub>5</sub>Se (M+H): 541.0484, found: 541.0482. IR:  $\nu$  2980, 2886, 1744, 1656, 1587, 1553, 1502, 1465, 1378, 1303, 1229, 1139, 1080, 1048, 840, 750, 737, 726, 525, 460, 408 cm<sup>-1</sup>.

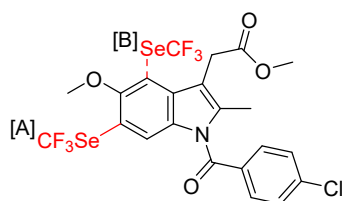

**5cf**, 97%, [A]:[B] = 3:2, A(methyl-2-(1-(4-chlorobenzoyl)-5-methoxy-2-methyl-6-((trifluoromethyl)selenyl)-1H-indol-3-yl)acetate): white solid, m.p. 124.8-125.3 °C, <sup>1</sup>H NMR (500 MHz, Chloroform-*d*)  $\delta$  7.69 – 7.65 (m, 2H), 7.52 – 7.47 (m, 2H), 7.29 (s, 1H), 7.01 (s, 1H), 3.93 (s, 3H), 3.72 (s, 3H), 3.69 (s, 2H), 2.42 (s, 3H); <sup>19</sup>F NMR (471 MHz, Chloroform-*d*)  $\delta$  -35.96 (s, 3F); <sup>13</sup>C NMR (126 MHz, Chloroform-*d*)  $\delta$  171.21, 168.12, 155.56, 139.91, 137.75, 133.31, 132.67, 131.31, 130.84, 129.39, 123.22, 122.55 (q, *J* = 334.8 Hz), 112.37, 108.19, 100.04, 56.62, 52.37, 30.17, 13.46. B(methyl 2-(1-(4-chlorobenzoyl)-5-methoxy-2-methyl-4-((trifluoromethyl)selenyl)-1H-indol-3-yl)acetate): light yellow solid, m.p. 97.6-98.1 °C, <sup>1</sup>H NMR (400 MHz, Chloroform-*d*)  $\delta$  7.68 (d, *J* = 8.4 Hz, 2H), 7.48 (d, *J* = 8.3 Hz, 2H), 7.27 (d, *J* = 9.2 Hz, 2H), 6.80 (d, *J* = 9.1 Hz, 1H), 4.10 (s, 2H), 3.89 (s, 3H), 3.72 (s, 3H), 2.30 (s, 3H); <sup>19</sup>F NMR (376 MHz, Chloroform-*d*)  $\delta$  -35.90 (s, 3F); <sup>13</sup>C NMR (101 MHz, Chloroform-*d*)  $\delta$  171.97, 168.17, 157.39, 139.93, 138.60, 133.68, 133.11, 131.91, 131.48, 129.41, 122.29 (q, *J* = 335.2 Hz), 117.88, 113.30, 107.61, 101.40, 57.11, 52.26, 31.13, 29.82, 13.55. HRMS-ESI (*m/z*) calcd for C<sub>21</sub>H<sub>17</sub>ClF<sub>3</sub>NNaO<sub>4</sub>Se (M+Na): 541.9856, found: 541.9850. IR:  $\nu$  2957, 2923, 2851, 1734, 1678, 1591, 1460, 1427, 1392, 1355, 1314, 1278, 1197, 1158, 1128, 1068, 907, 845, 827, 787, 764, 738, 681, 624, 567, 482, 461, 408 cm<sup>-1</sup>.

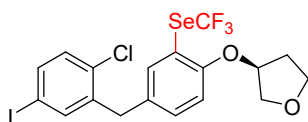

**5cg**, ((S)-3-(4-(2-chloro-5-iodobenzyl)-2-((trifluoromethyl)selanyl)phenoxy)tetrahydrofuran), light yellow viscous oil (97%), <sup>1</sup>H NMR (400 MHz, Chloroform-*d*) δ 7.52=7.46 (m, 3H), 7.15 (dd, *J* = 8.4, 2.3 Hz, 1H), 7.11 (d, *J* = 8.2 Hz, 1H), 6.80 (d, *J* = 8.4 Hz, 1H), 4.98-4.94 (m, 1H), 4.05 (dd, *J* = 10.2, 4.8 Hz, 1H), 4.00 – 3.90 (m, 5H), 2.19-2.16 (m, 2H); <sup>19</sup>F NMR (376 MHz, Chloroform-*d*) δ -34.91 (s, 3F); <sup>13</sup>C NMR (126 MHz, Chloroform-*d*) δ 155.71, 140.66, 139.58, 137.68, 137.01, 134.30, 132.28, 131.87, 131.42, 114.07, 113.15, 91.84, 78.68, 72.95, 67.28, 37.87, 33.14. HRMS-ESI (*m/z*) calcd for C<sub>18</sub>H<sub>16</sub>ClF<sub>3</sub>IO<sub>2</sub>Se (M+H): 562.8995, found: 562.8995. IR: *ν* 2967, 2921, 2867, 1618, 1598, 1484, 1460, 1335, 1276, 1252, 1133, 1084, 1048, 1014, 934, 897, 812, 795, 737, 638, 603, 531, 518 cm<sup>-1</sup>.

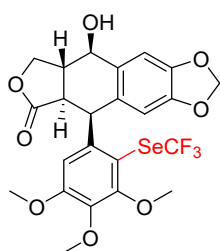

**5ch**, ((5*S*,5*aR*,8*aR*,9*R*)-9-hydroxy-5-(3,4,5-trimethoxy-2-((trifluoromethyl)selanyl) phenyl)-5,8,8*a*,9-tetrahydrofuro[3',4':6,7]naphtho[2,3-*d*][1,3]dioxol-6(5*aH*)-one), white solid (96%), m.p. 182.1-182.4 °C, <sup>1</sup>H NMR (400 MHz, Chloroform-*d*) δ 7.14 (s, 1H), 6.18 (s, 1H), 6.09 (s, 1H), 5.99 (dd, *J* = 4.1, 1.0 Hz, 2H), 5.40 (d, *J* = 6.4 Hz, 1H), 4.62 (d, *J* = 9.8 Hz, 1H), 4.50 (dd, *J* = 8.3, 7.1 Hz, 1H), 4.12 (dd, *J* = 10.4, 8.4 Hz, 1H), 3.81 (s, 3H), 3.75 (s, 3H), 3.60 (s, 4H), 3.39 – 3.33 (m, 2H), 2.79 – 2.65 (m, 1H); <sup>19</sup>F NMR (376 MHz, Chloroform-*d*) δ -36.48 (s, 3F); <sup>13</sup>C NMR (101 MHz, Chloroform-*d*) δ 174.41, 155.54, 155.38, 148.08, 147.75, 141.71, 140.82, 132.91, 131.47, 123.23 (q, *J* = 334.6 Hz), 115.46, 110.19, 109.87, 105.72, 101.58, 71.86, 71.37, 61.41, 61.00, 56.21, 44.11, 43.40, 41.26. HRMS-ESI (*m/z*) calcd for C<sub>23</sub>H<sub>21</sub>F<sub>3</sub>NaO<sub>8</sub>Se (M+Na): 585.0246, found: 585.0246. IR: *ν* 2987, 2970, 2912, 1764, 1579, 1559, 1480, 1385, 1327, 1304, 1233, 1172, 1085, 1047, 1005, 933, 878, 863, 770, 736, 695, 665, 566, 517, 429, 409 cm<sup>-1</sup>.

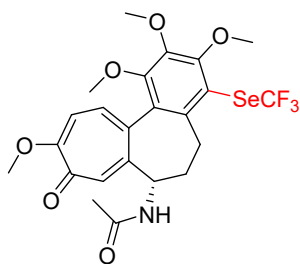

**5ci**, ((S)-N-(1,2,3,10-tetramethoxy-9-oxo-4-((trifluoromethyl)selanyl)-5,6,7,9-tetrahydrobenzo[*a*]heptalen



-7-yl)acetamide), light yellow solid (54%), m.p. 130.9-131.4 °C, <sup>1</sup>H NMR (400 MHz, Chloroform-*d*) δ 8.64 (d, *J* = 6.0 Hz, 1H), 7.62 (s, 1H), 7.29 (s, 1H), 6.88 (d, *J* = 10.9 Hz, 1H), 4.52 (dt, *J* = 11.5, 5.6 Hz, 1H), 4.02 (s, 3H), 3.97 (s, 3H), 3.95 (s, 3H), 3.66 (s, 3H), 3.53 (d, *J* = 7.8 Hz, 1H), 2.33 – 2.25 (m, 2H), 1.96 (s, 3H), 1.92 – 1.82 (m, 1H); <sup>19</sup>F NMR (376 MHz, Chloroform-*d*) δ -35.05 (s, 3F); <sup>13</sup>C NMR (101 MHz, Chloroform-*d*) δ 179.63, 170.57, 164.52, 156.13, 154.30, 152.35, 145.90, 140.19, 136.28, 135.97, 130.05, 129.81, 122.20 (q, *J* = 334.5 Hz), 112.98, 112.77, 61.65, 61.43, 61.34, 56.66, 52.79, 35.01, 29.75, 22.75. HRMS-ESI (m/z) calcd for C<sub>23</sub>H<sub>25</sub>F<sub>3</sub>NO<sub>6</sub>Se (M+H): 548.0794, found: 548.0786. IR: *ν* 3276, 2980, 2944, 2921, 1646, 1618, 1587, 1563, 1542, 1457, 1406, 1346, 1249, 1120, 1090, 1052, 1016, 976, 952, 834, 736, 674, 607, 519, 506, 461, 426, 411 cm<sup>-1</sup>.

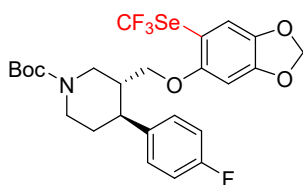

**5cj**, (tert-butyl(3R,4S)-4-(4-fluorophenyl)-3-(((6-((trifluoromethyl)selanyl)benzo[d][1,3]dioxol-5-yl)oxy)-methyl)piperidine-1-carboxylate), white solid (97%), m.p. 54.4-54.9 °C, <sup>1</sup>H NMR (500 MHz, Chloroform-*d*) δ 7.18 – 7.10 (m, 3H), 6.97 (t, *J* = 8.7 Hz, 2H), 6.28 (s, 1H), 5.93 (s, 2H), 4.43 (d, *J* = 13.4 Hz, 1H), 3.65 (dd, *J* = 9.2, 2.6 Hz, 1H), 3.60 – 3.45 (m, 1H), 2.88 (d, *J* = 65.0 Hz, 3H), 2.03 (d, *J* = 8.6 Hz, 1H), 1.85-1.80 (m, 1H), 1.76-1.67 (m, 1H), 1.50 (s, 9H); <sup>19</sup>F NMR (471 MHz, Chloroform-*d*) δ -36.01 (s, 3F), -116.16 (s, 1F); <sup>13</sup>C NMR (126 MHz, Chloroform-*d*) δ 155.30, 154.97, 151.17, 141.92, 139.22, 139.19, 128.94, 128.88, 122.60 (q, *J* = 334.3 Hz), 117.25, 115.77, 115.60, 102.08, 101.89, 95.67, 79.85, 42.16, 34.02, 28.62. HRMS-ESI (m/z) calcd for C<sub>25</sub>H<sub>27</sub>F<sub>4</sub>NNaO<sub>5</sub>Se (M+Na): 600.0883, found: 600.0873. IR: *ν* 2981, 2920, 1683, 1606, 1509, 1465, 1422, 1386, 1366, 1280, 1225, 1186, 1160, 1123, 1092, 1038, 934, 866, 832, 752, 737, 668, 567, 538, 410 cm<sup>-1</sup>.

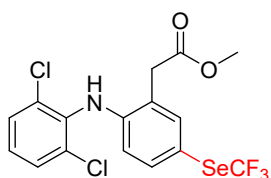

**5ck**, (methyl 2-(2-((2,6-dichlorophenyl)amino)-5-((trifluoromethyl)selanyl)phenyl) acetate), white solid (99%), m.p. 84.6-85.0 °C, <sup>1</sup>H NMR (400 MHz, Chloroform-*d*) δ 7.59 (d, *J* = 2.1 Hz, 1H), 7.47 (dd, *J* =

8.4, 2.1 Hz, 1H), 7.39 (s, 1H), 7.37 (s, 1H), 7.20 (s, 1H), 7.06 (t,  $J = 8.1$  Hz, 1H), 6.47 (d,  $J = 8.3$  Hz, 1H), 3.80 (s, 2H), 3.78 (s, 3H);  $^{19}\text{F}$  NMR (376 MHz, Chloroform-*d*)  $\delta$  -36.82 (s, 3F);  $^{13}\text{C}$  NMR (101 MHz, Chloroform-*d*)  $\delta$  172.31, 145.17, 139.98, 137.42, 136.61, 130.59, 129.10, 125.42, 124.34, 122.58 (q,  $J = 333.5$  Hz), 118.08, 113.42, 52.78, 38.45. HRMS-ESI ( $m/z$ ) calcd for  $\text{C}_{16}\text{H}_{12}\text{Cl}_2\text{F}_3\text{NNaO}_2\text{Se}$  ( $\text{M}+\text{Na}$ ): 479.9255, found: 479.9252. IR:  $\nu$  3375, 2964, 2922, 2858, 1783, 1741, 1687, 1656, 1597, 1526, 1494, 1457, 1438, 1384, 1338, 1290, 1248, 1183, 1145, 1087, 1062, 889, 748, 691, 673, 591, 577, 530, 505, 410  $\text{cm}^{-1}$ .

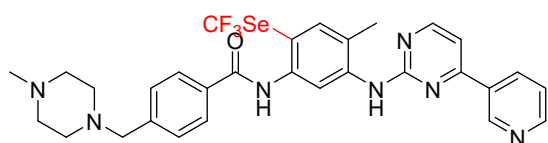

**5cl**, (N-(4-methyl-5-((4-(pyridin-3-yl)pyrimidin-2-yl)amino)-2-((trifluoromethyl) selanyl)phenyl)-4-((4-methylpiperazin-1-yl)methyl)benzamide), light yellow solid (61%), m.p. 202.3-202.7 °C,  $^1\text{H}$  NMR (400 MHz, Chloroform-*d*)  $\delta$  9.81 9.75 (s, 1H), 9.23 (d,  $J = 2.4$  Hz, 1H), 9.00 (s, 1H), 8.76 (dt,  $J = 8.0, 2.0$  Hz, 1H), 8.69 (dd,  $J = 4.8, 1.7$  Hz, 1H), 8.55 (d,  $J = 5.2$  Hz, 1H), 7.96 – 7.85 (m, 2H), 7.60 (s, 1H), 7.48 (d,  $J = 8.1$  Hz, 2H), 7.42 (dd,  $J = 8.0, 4.8$  Hz, 1H), 7.25 (d,  $J = 5.2$  Hz, 2H), 3.58 (s, 2H), 2.52 (s, 8H), 2.33 (s, 3H), 2.32 (s, 3H);  $^{19}\text{F}$  NMR (376 MHz, Chloroform-*d*)  $\delta$  -35.87 (s, 3F);  $^{13}\text{C}$  NMR (101 MHz, Chloroform-*d*)  $\delta$  164.82, 163.02, 160.03, 159.23, 151.65, 148.57, 142.97, 141.86, 140.71, 139.75, 135.76, 132.57, 129.61, 127.10, 123.99, 123.01, 122.19 (q,  $J = 335.7$  Hz), 111.49, 109.29, 104.97, 62.50, 55.07, 52.94, 45.90, 17.50. HRMS-ESI ( $m/z$ ) calcd for  $\text{C}_{30}\text{H}_{31}\text{F}_3\text{N}_7\text{OSe}$  ( $\text{M}+\text{H}$ ): 642.1702, found: 642.1702. IR:  $\nu$  3434, 2951, 2928, 2795, 1654, 1569, 1514, 1498, 1441, 1413, 1395, 1318, 1124, 1096, 1008, 904, 878, 861, 796, 755, 735, 700, 685, 583, 459  $\text{cm}^{-1}$ .

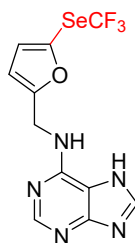

**5cm**, (N-((5-((trifluoromethyl)selanyl)furan-2-yl)methyl)-7H-purin-6-amine), light brown solid (98%), m.p. 190.9-191.3 °C,  $^1\text{H}$  NMR (400 MHz, DMSO-*d*<sub>6</sub>)  $\delta$  12.96 (s, 1H), 8.22 (s, 2H), 8.15 (s, 1H), 7.01 (d,  $J = 3.3$  Hz, 1H), 6.41 (d,  $J = 3.3$  Hz, 1H), 4.76 (s, 2H);  $^{19}\text{F}$  NMR (376 MHz, DMSO-*d*<sub>6</sub>)  $\delta$  -37.03 (s, 3F);  $^{13}\text{C}$  NMR (101

MHz, DMSO-*d*<sub>6</sub>)  $\delta$  160.17, 152.20, 139.55, 130.35, 125.77, 122.18 (q, *J* = 338.0 Hz), 109.70. HRMS-ESI (*m/z*) calcd for C<sub>11</sub>H<sub>9</sub>F<sub>3</sub>N<sub>5</sub>OSe (M+H): 363.9919, found: 363.9908. IR:  $\nu$  3271, 2969, 2937, 1746, 1618, 1590, 1455, 1404, 1301, 1252, 1137, 1086, 1013, 934, 897, 795, 737, 723, 662, 637, 519, 469, 409 cm<sup>-1</sup>.

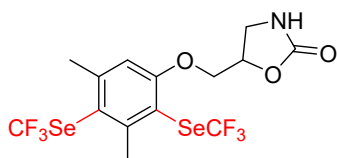

**5cn**, (5-((3,5-dimethyl-2,4-bis((trifluoromethyl)selanyl)phenoxy)methyl)oxazolidin-2-one), white solid (91%), m.p. 94.4-94.6 °C, <sup>1</sup>H NMR (400 MHz, Chloroform-*d*)  $\delta$  6.84 (s, 1H), 5.42 (s, 1H), 5.02 (dtd, *J* = 9.0, 5.4, 3.7 Hz, 1H), 4.28-4.10 (m, 2H), 3.90 – 3.80 (m, 1H), 3.76-3.72 (m, 1H), 2.98 (s, 3H), 2.66 (s, 3H); <sup>19</sup>F NMR (376 MHz, Chloroform-*d*)  $\delta$  -35.12 (s, 3F), -35.58 (s, 3F); <sup>13</sup>C NMR (126 MHz, Chloroform-*d*)  $\delta$  160.64, 159.56, 152.92, 150.79, 122.84 (q, *J* = 334.5 Hz), 122.66 (q, *J* = 334.4 Hz), 121.33, 118.71, 111.90, 73.77, 68.82, 42.78, 27.21, 26.16. HRMS-ESI (*m/z*) calcd for C<sub>14</sub>H<sub>13</sub>F<sub>6</sub>NNaO<sub>3</sub>Se<sub>2</sub> (M+Na): 539.9022, found: 539.9020. IR:  $\nu$  3270, 3170, 2979, 2911, 1780, 1751, 1562, 1544, 1450, 1372, 1313, 1246, 1213, 1141, 1079, 1041, 928, 840, 757, 736, 667, 763, 406 cm<sup>-1</sup>.

## 8) References

- [1] Clarembreau, M.; Cravador, A.; Dumont, W.; Hevesi, L.; Krief, A.; Lucchetti, J.; Ende, D. V. *Tetrahedron* **1985**, *41*, 4793-4812.
- [2] a) Billard, T.; Large, S.; Langlois, B. R. *Tetrahedron Letters* **1997**, *38*, 65-68; b) Billard, T.; Langlois, B. R.; Large, S. *Phosphorus, Sulfur and Silicon and the Related Elements* **1998**, *136*, 521-524; c) Glenadel, Q.; Ismalaj, E.; Billard, T. *Journal of Organic Chemistry* **2016**, *81*, 8268-8275; d) Ghiazza, C.; Tlili, A.; Billard, T. *Molecules* **2017**, *22*, 833-841; e) Banliat, A. D. Z.; Grollier, K.; Damond, A.; Billard, T.; Dagousset, G.; Magnier, E.; Pegot, B. *Tetrahedron* **2021**, *101*, 132507-132514.
- [3] Dolenc, D. *Synlett* **2000**, *4*, 544-546.
- [4] Leonard, F.; Wajngurt, A.; Klein, M.; Smith, C. M. *Journal of Organic Chemistry* **1961**, *26*, 4062-4064.
- [5] Richmond, E.; Khan, I. U.; Moran, J. *Chemistry-A European Journal* **2016**, *22*, 2274-12277.
- [6] Manley, D. W.; McBurney, R. T.; Miller, P.; Walton, J. C. *The Journal of Organic Chemistry* **2014**, *79*, 1386-1398.

[7] Zhao, D.; Xu, P.; Ritter, T. *Chem* **2019**, *5*, 97-107.

[8] Peterson, M. A.; Bradley L. Nilsson, B. L. *Synthetic Communications* **1999**, *29*,3821-3827.

[9] Schmidta, S.; Hanelt, S.; Canitz, C.; Hoffmanna, H.; Garbeb, L. A.; Schneider, R. J. *Synlett* **2017**, *28*, 1984-1989.

## 9) $^1\text{H}$ , $^{19}\text{F}$ & $^{13}\text{C}$ spectra

The single peak nearby 0.00 in the NMR spectra is the chemical shift of the internal standard.

(selenocyanatomethyl)benzene

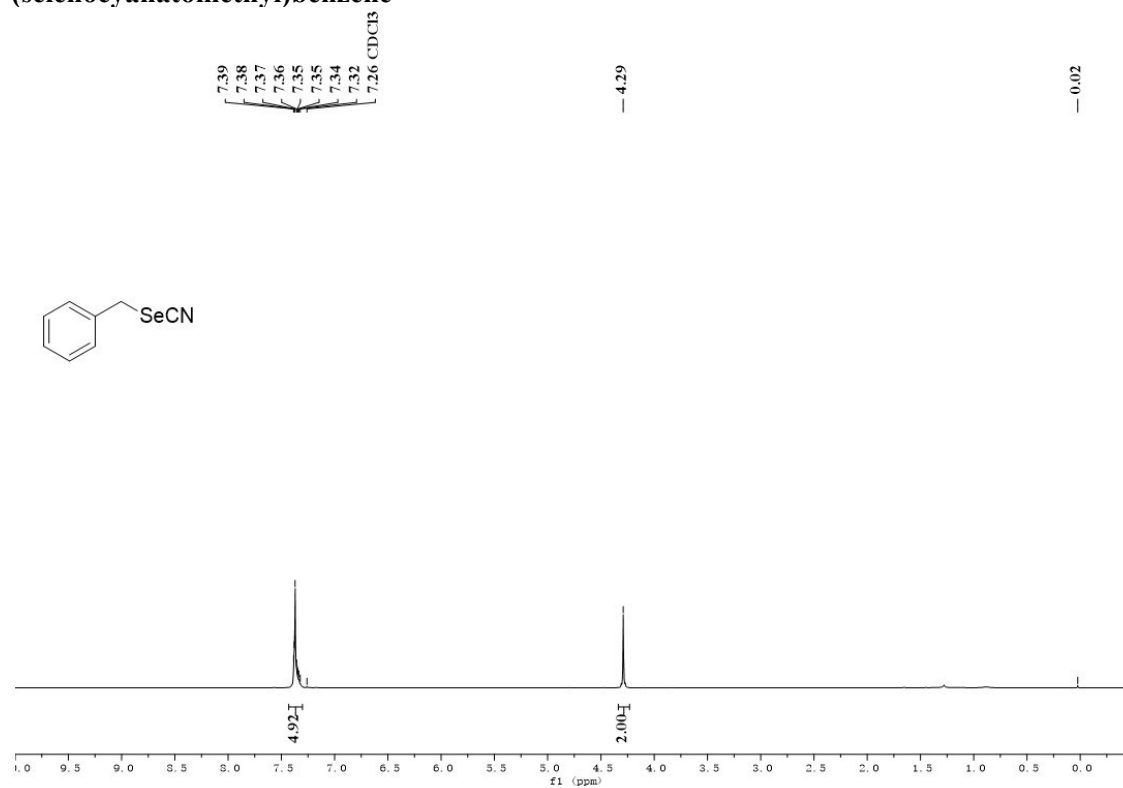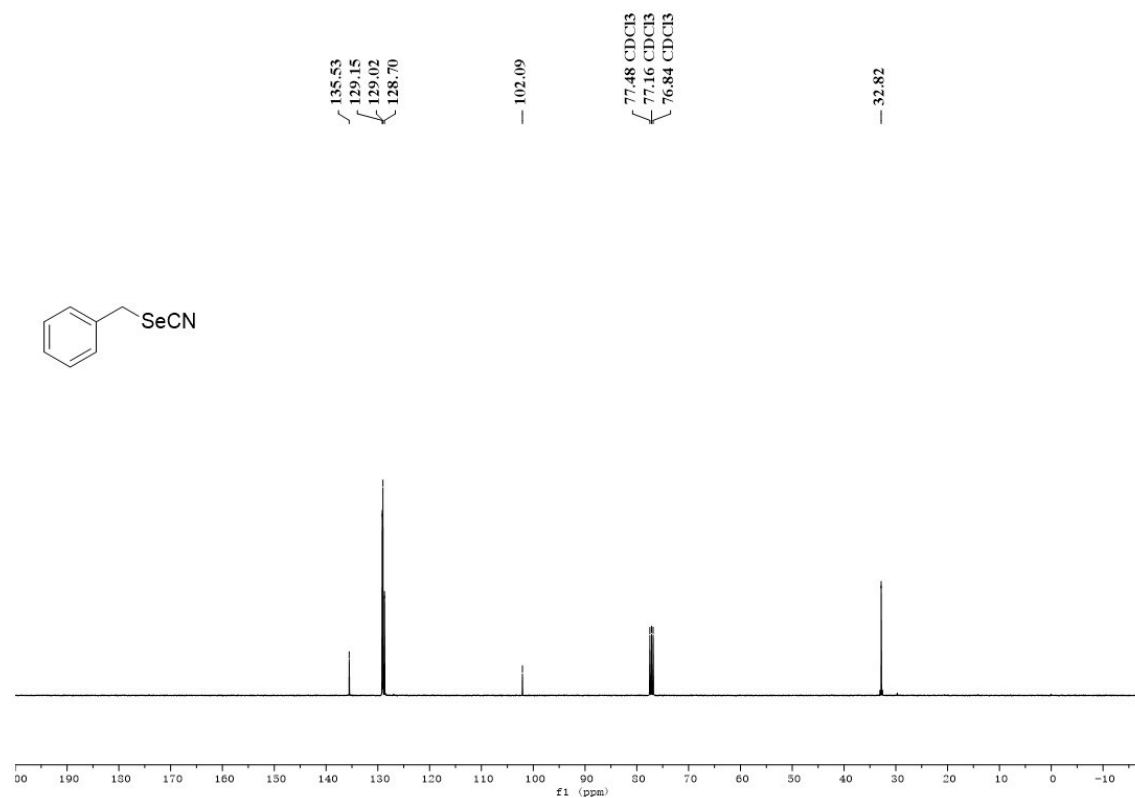

# Benzyl(trifluoromethyl)selane

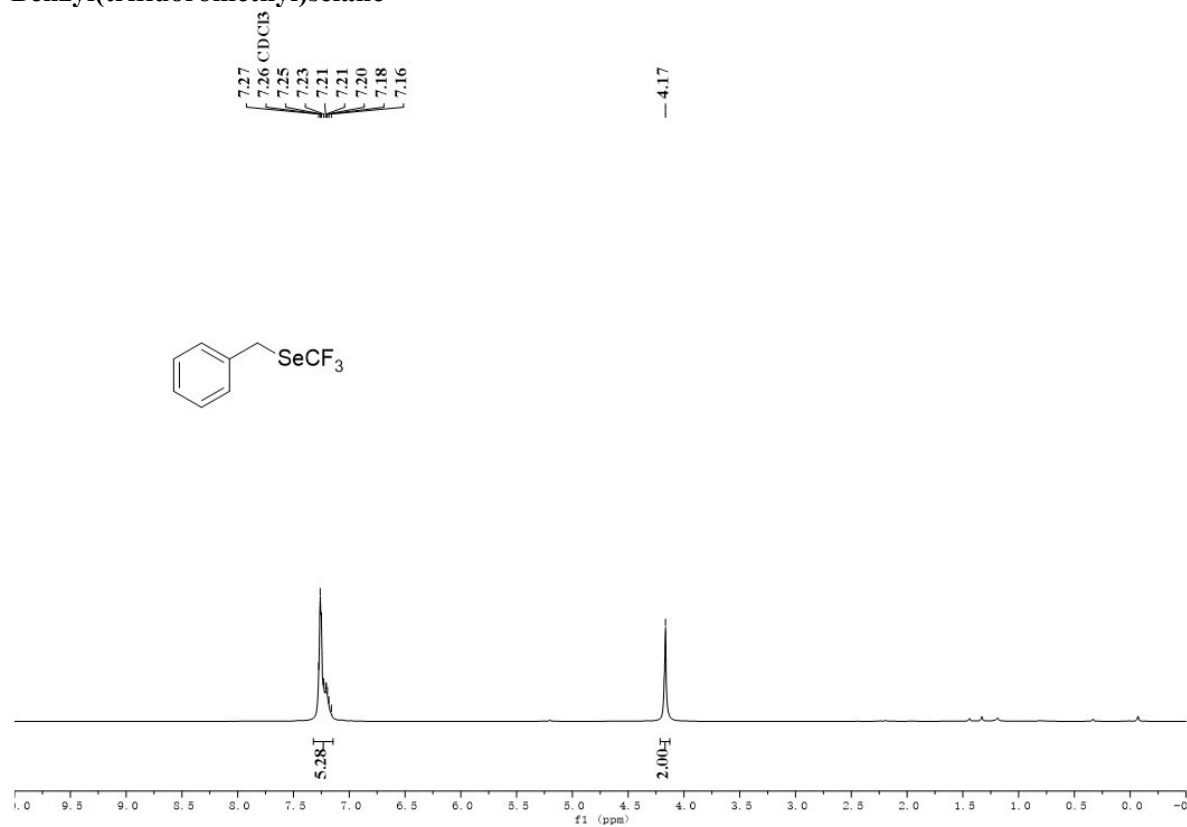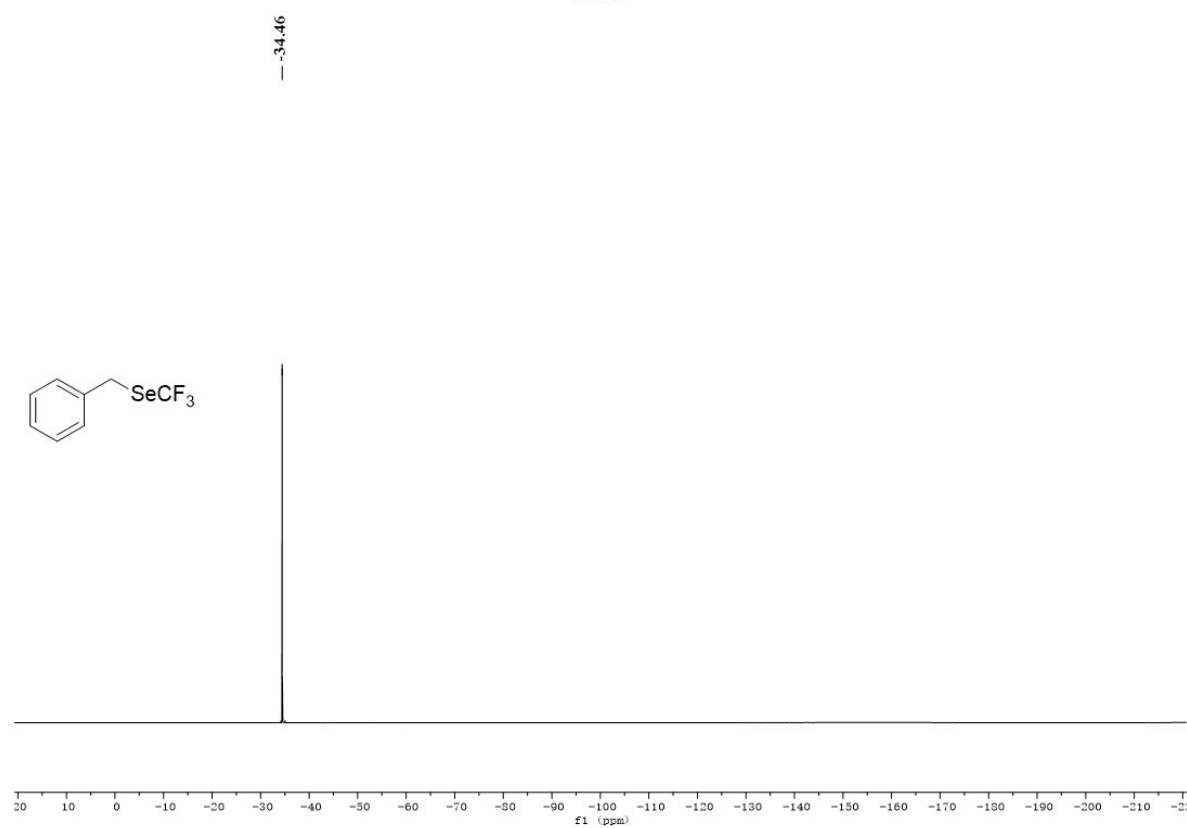

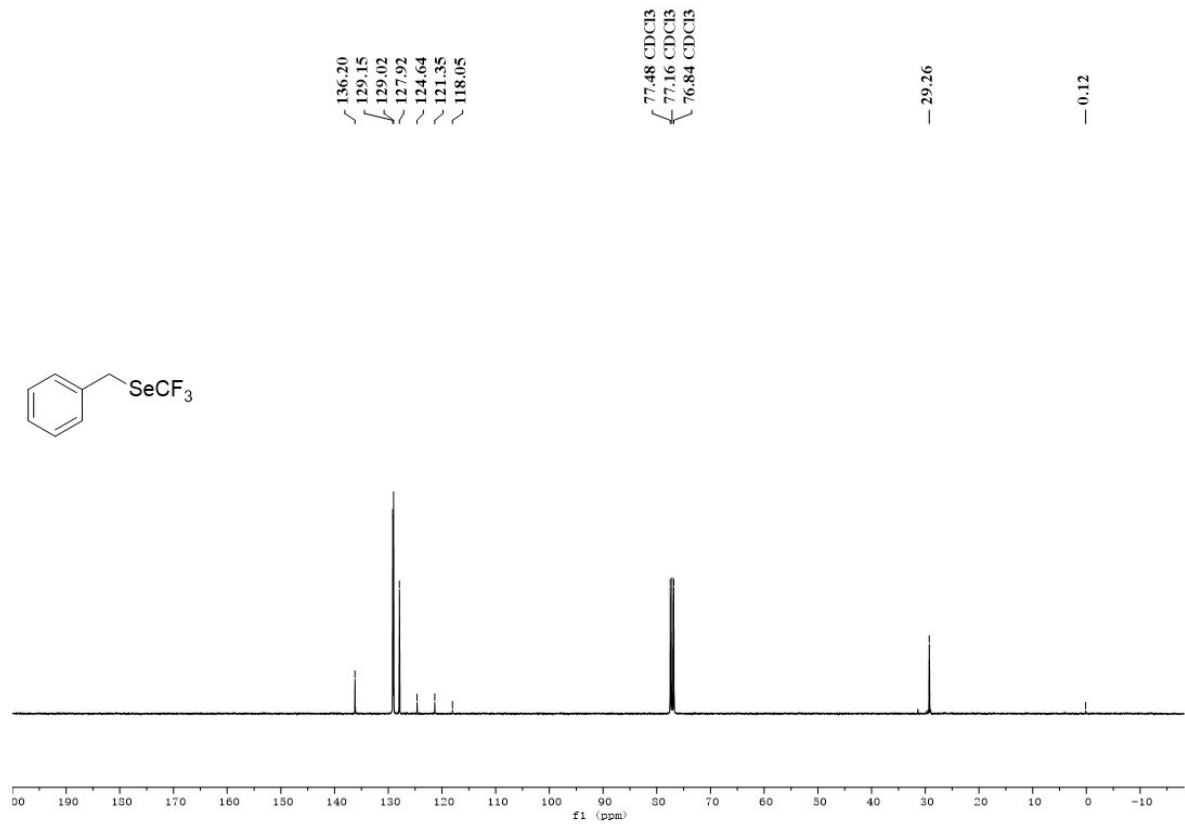

### Saccharin silver

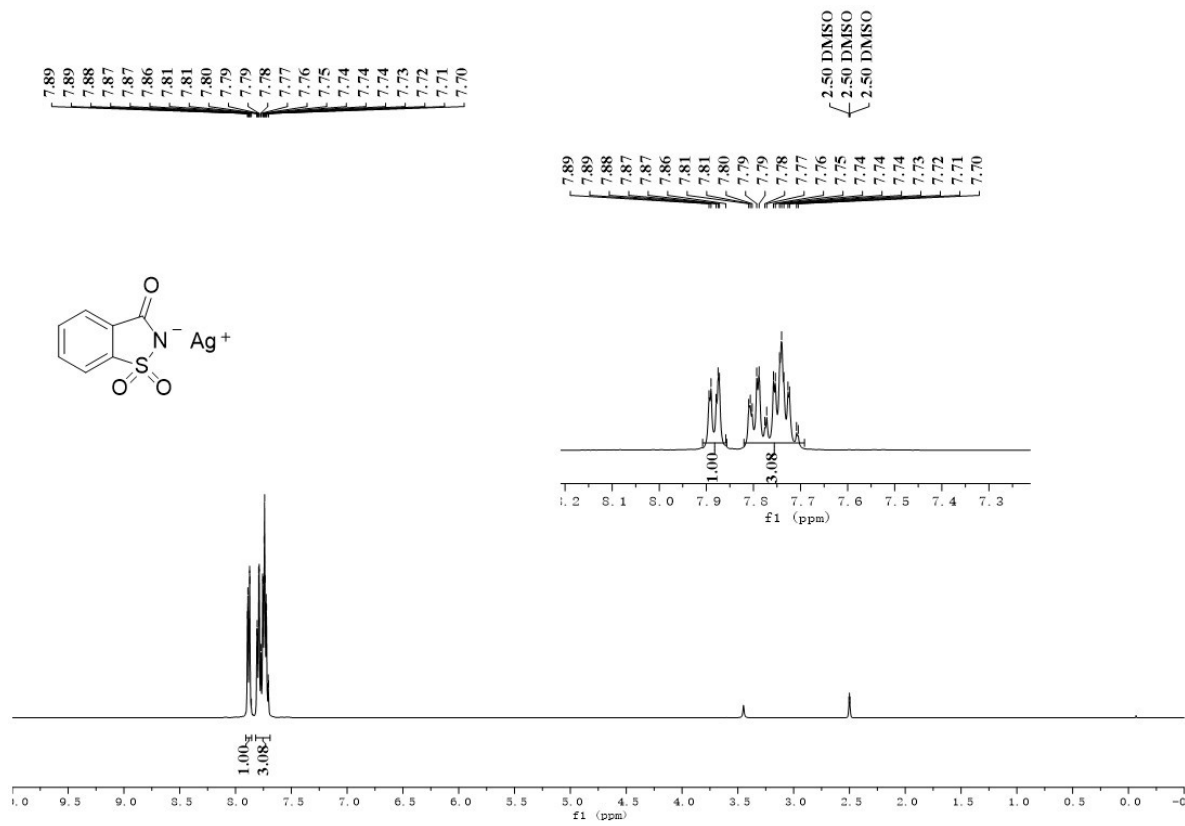

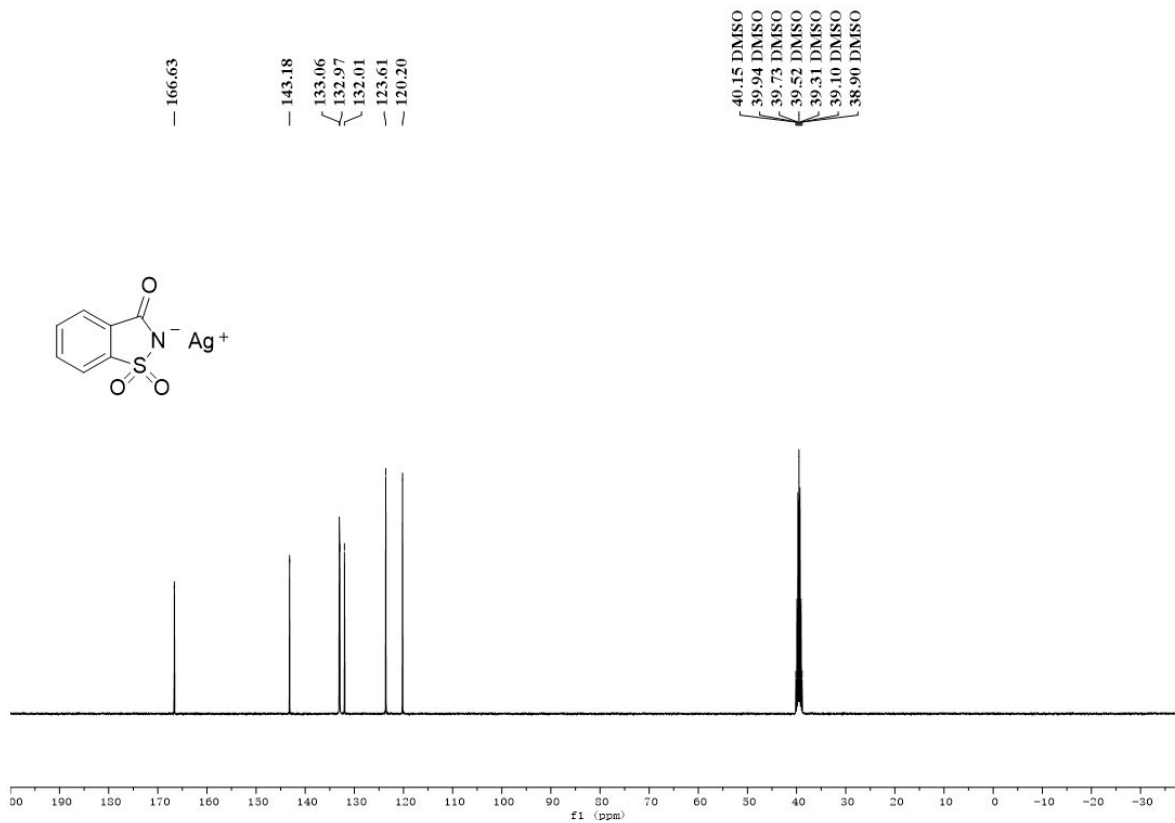

### 3 (N-trifluoromethylselenolating saccharin)

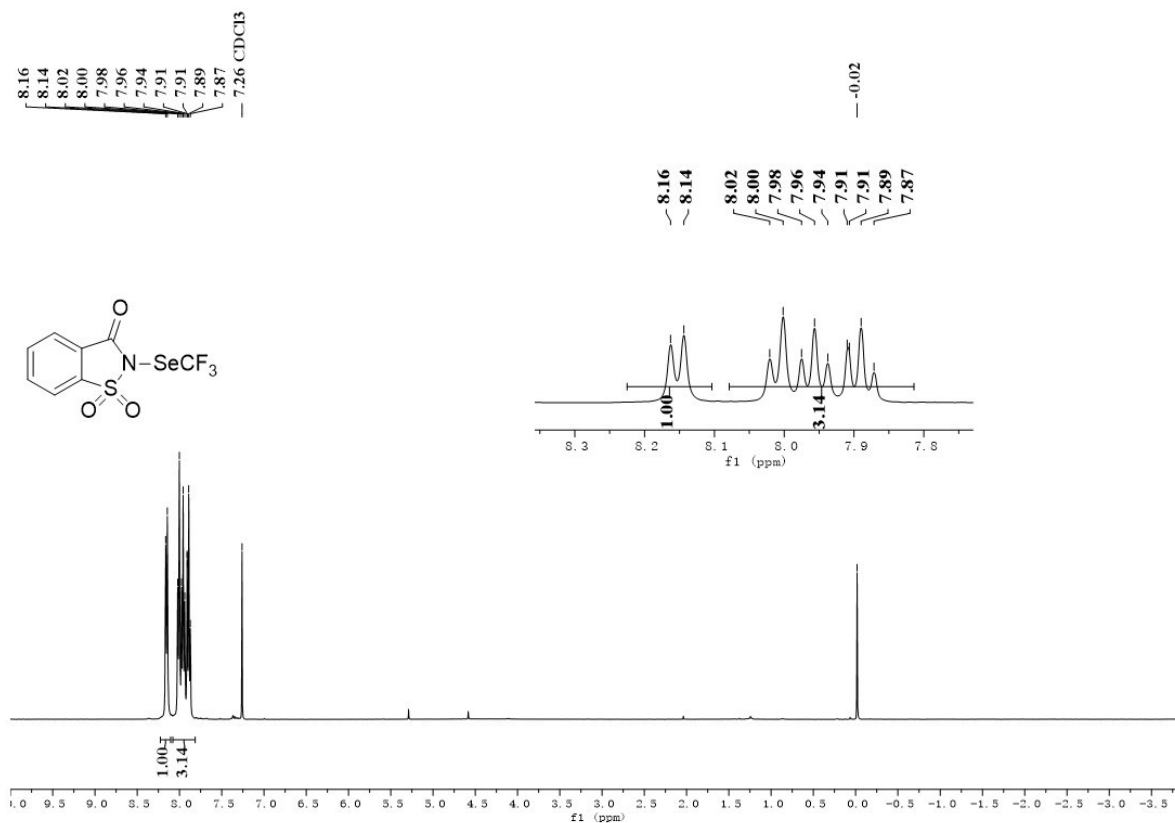



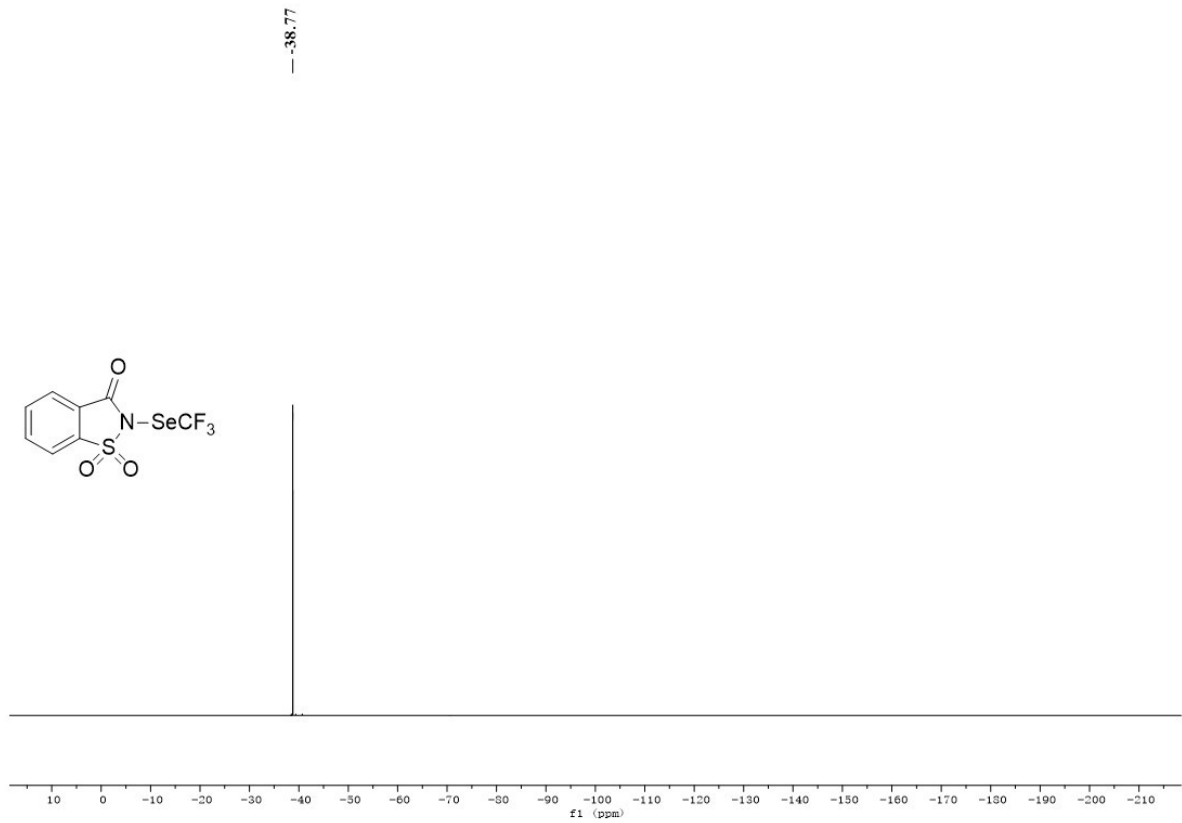

— 159.60

138.62  
136.03  
134.85  
127.75  
126.87  
126.50  
124.37  
122.00  
120.98  
117.60

77.48 CDCl3  
77.16 CDCl3  
76.84 CDCl3

— 0.07

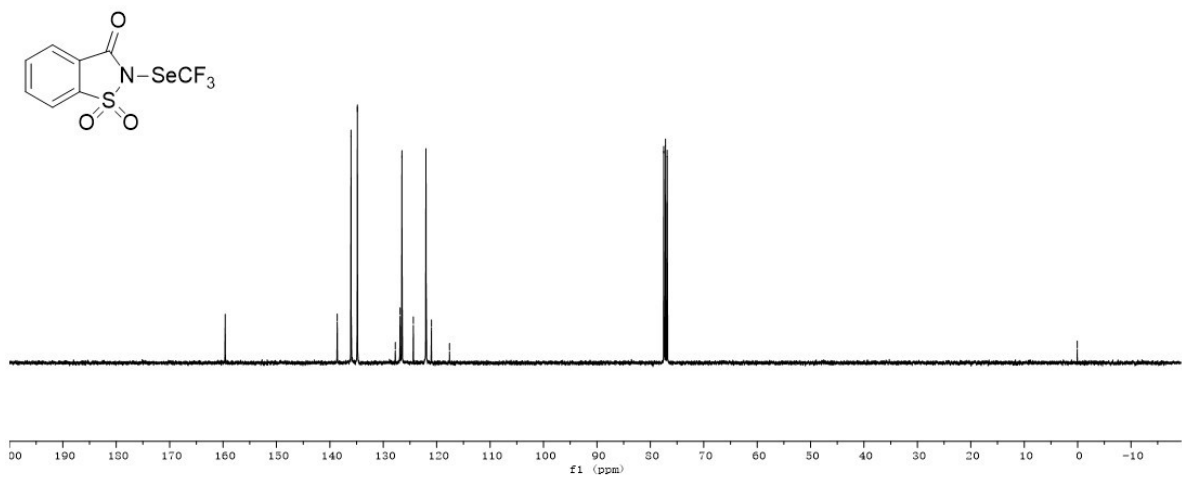

**4ah** (ethyl 2-cyano-2-(3,4-dimethoxyphenyl)acetate)

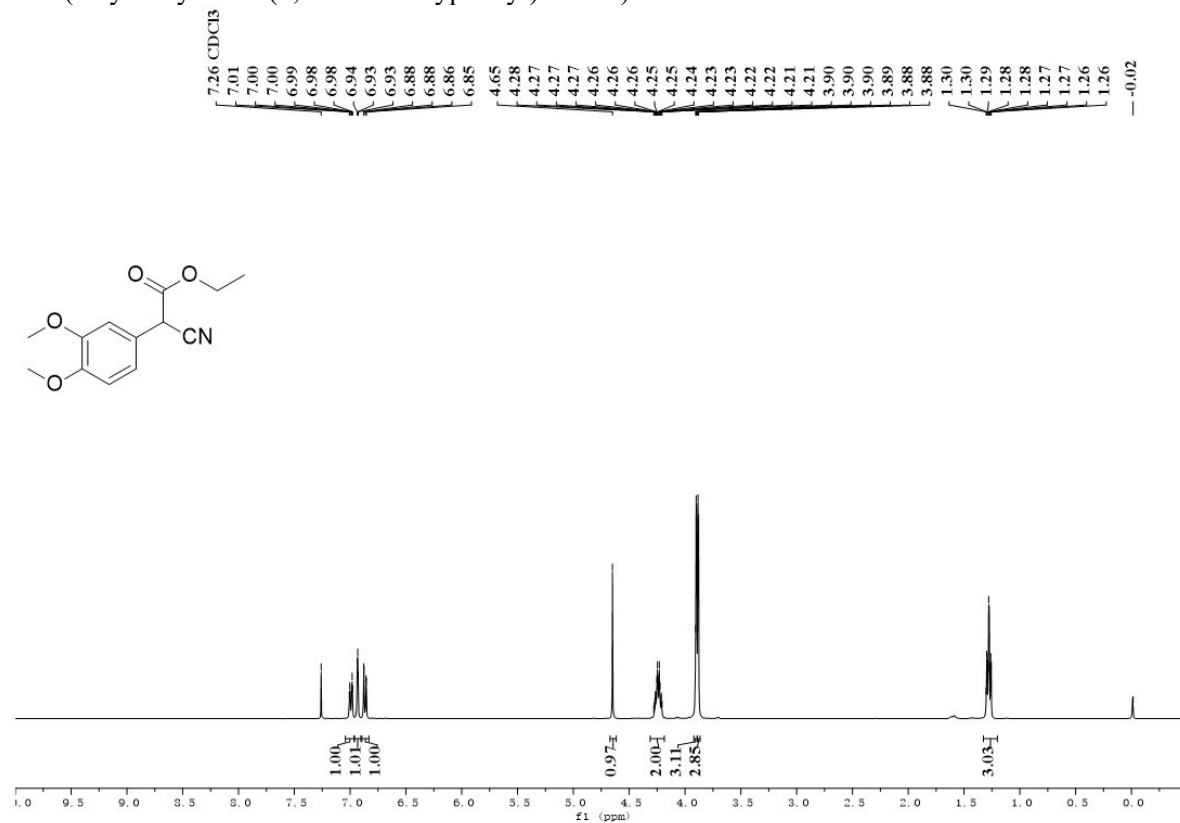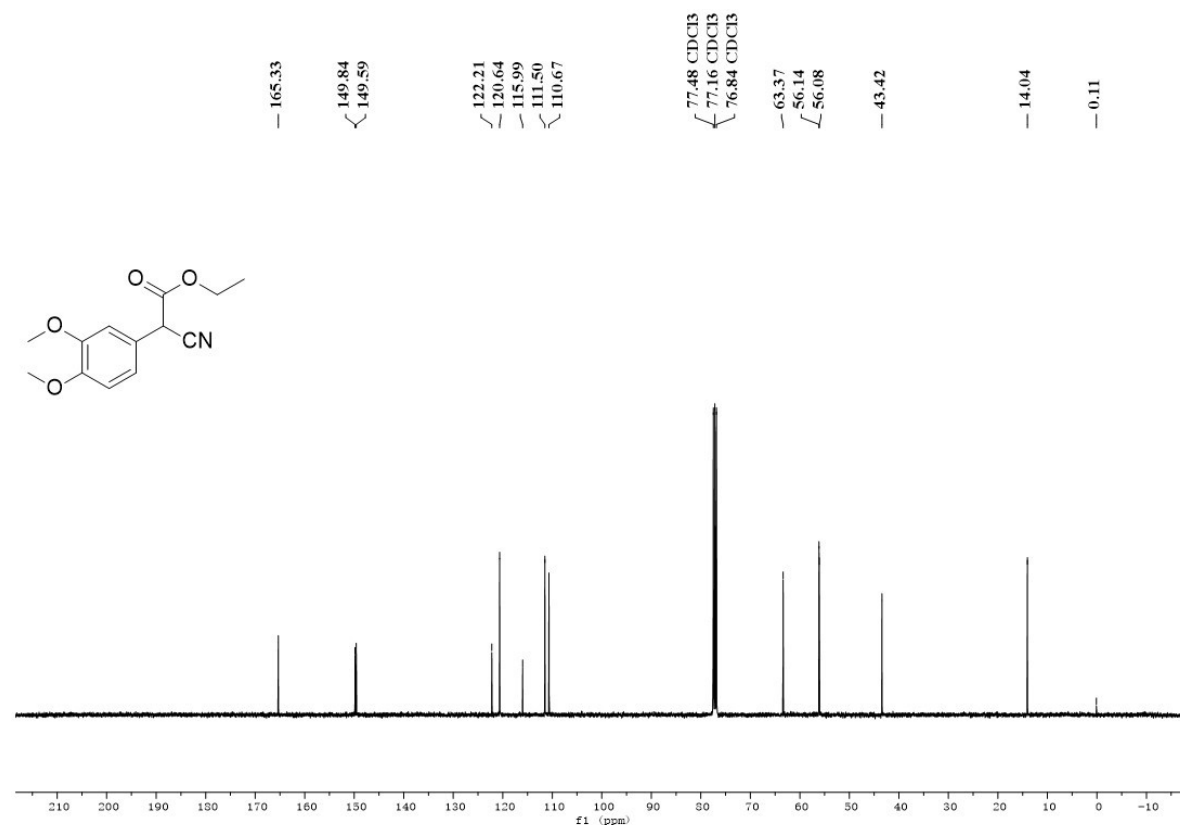

**4ai** (benzyl (4-methoxybenzyl)carbamate)

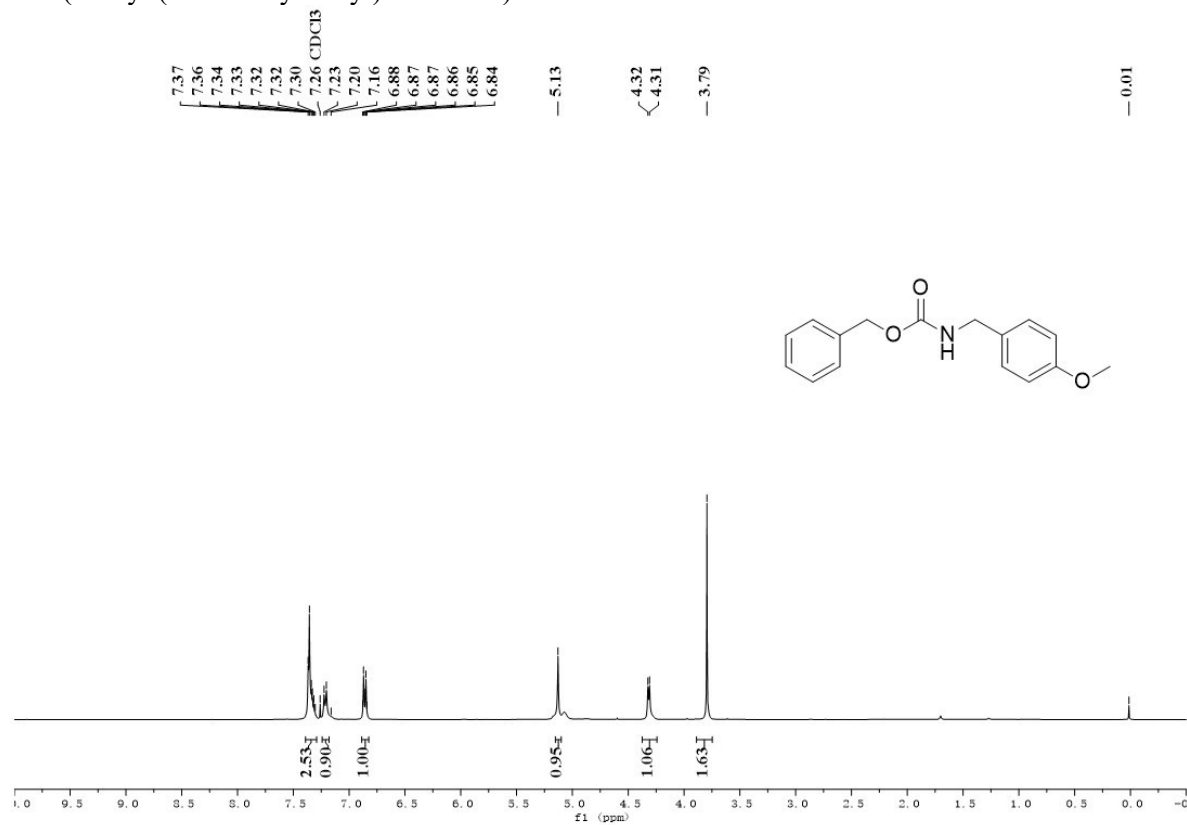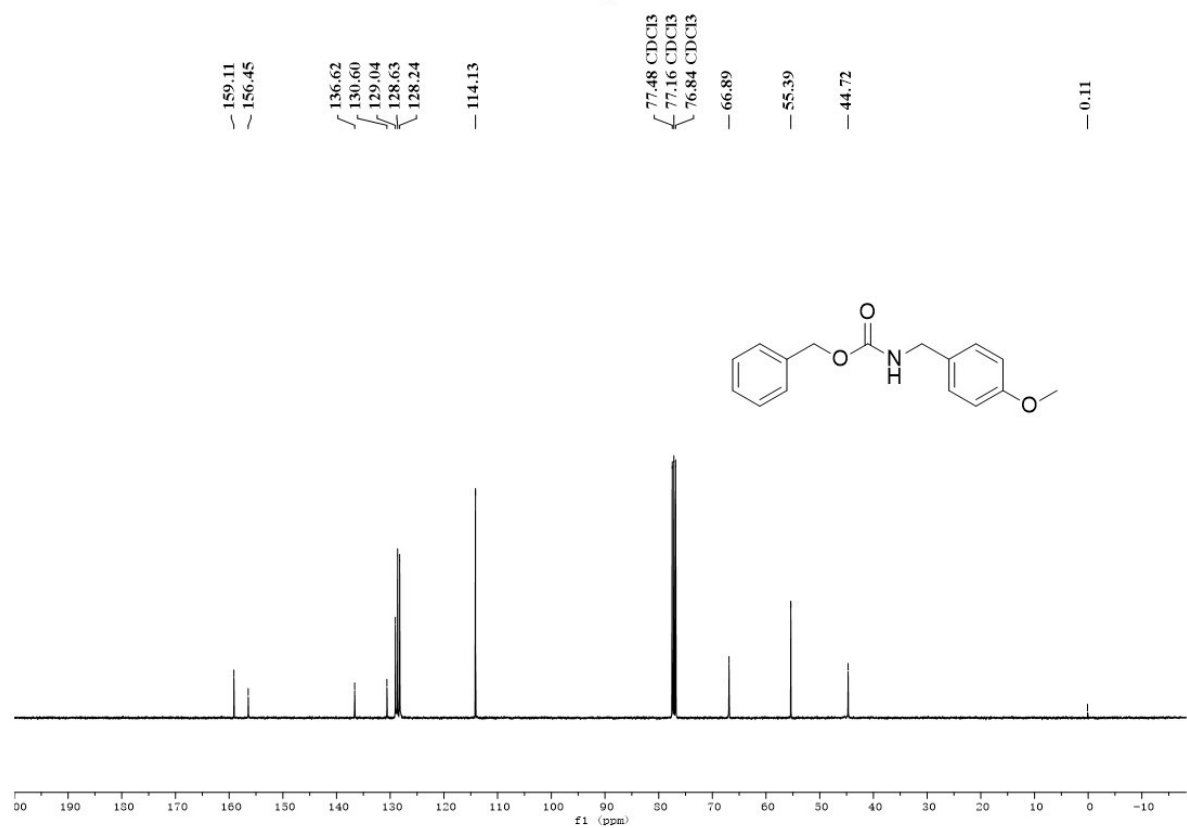

**4ak** ((2-bromophenoxy)(tert-butyl)dimethylsilane)

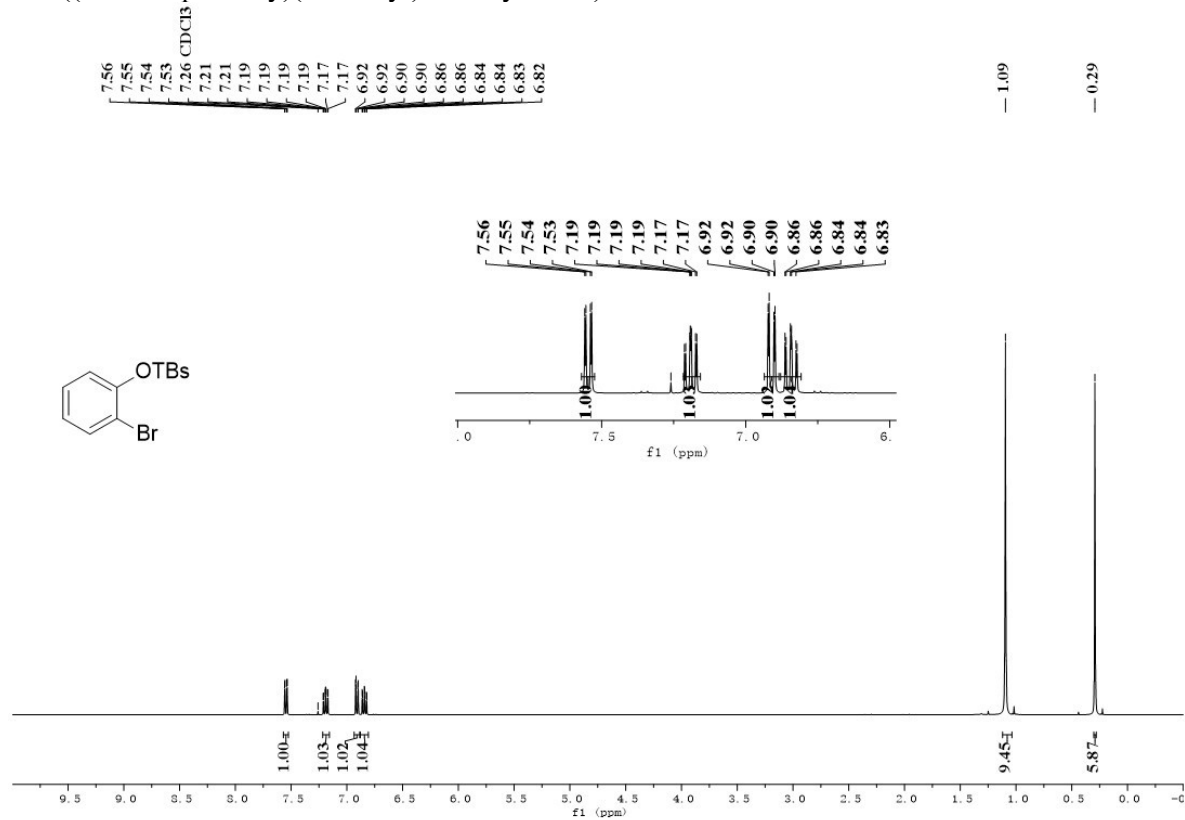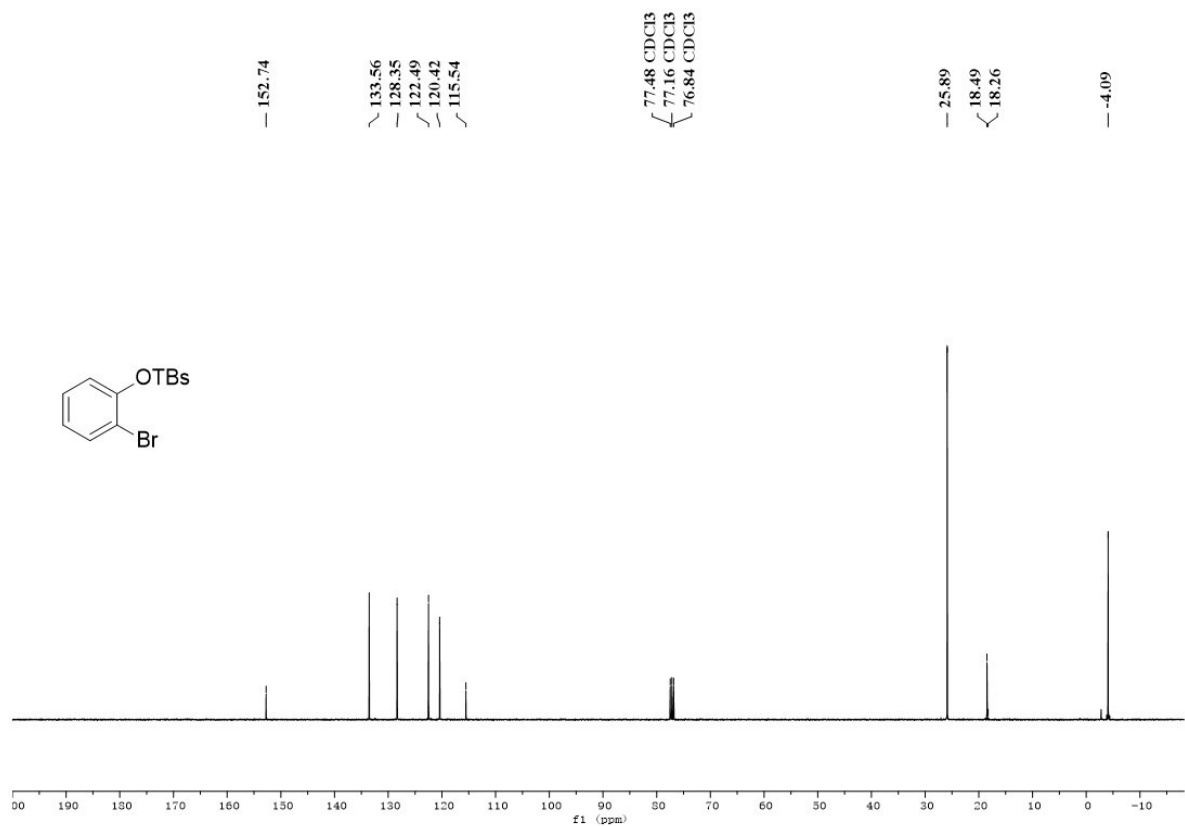

**4cc** (1-(4-fluorophenyl)-3-(3-(4-fluorophenyl)-3-(2,2,2-trifluoroethoxy)propyl)-4-(4-hydroxyphenyl)azetidin-2-one)

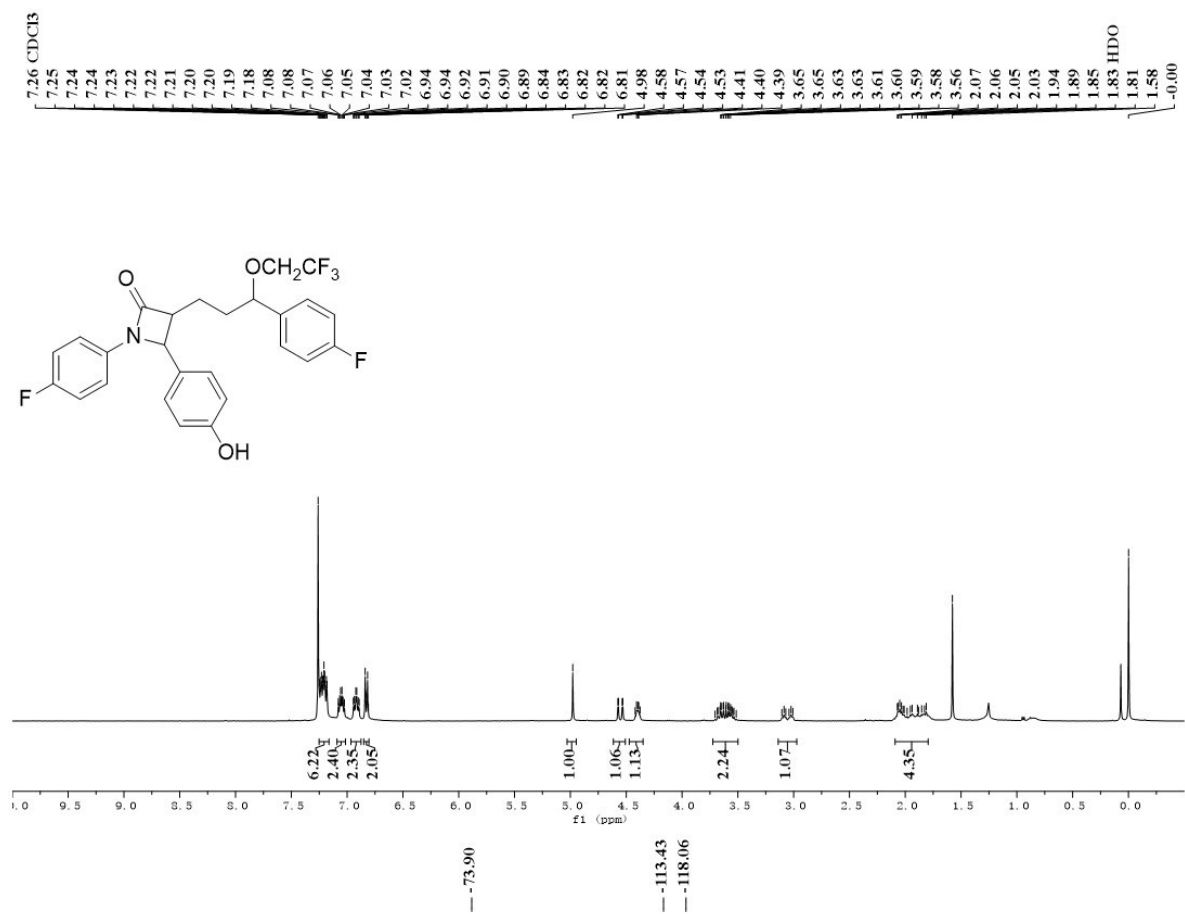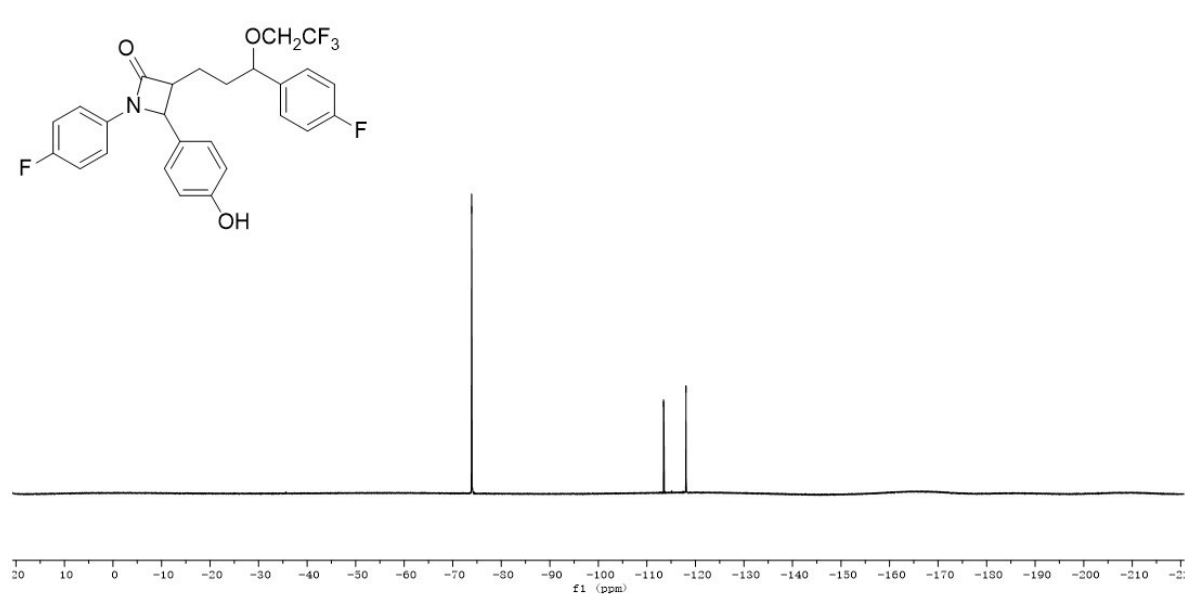

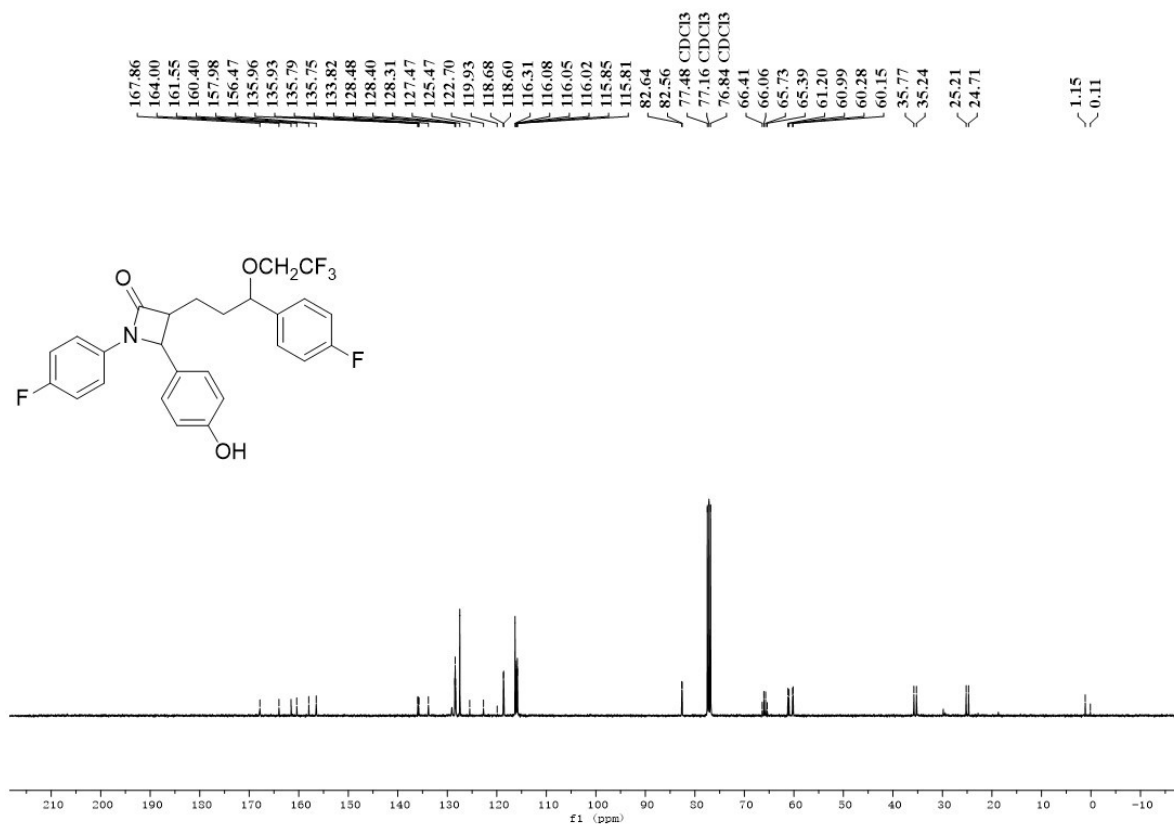

**4c** (methyl 2-(1-(4-chlorobenzoyl)-5-methoxy-2-methyl-1H-indol-3-yl)acetate)

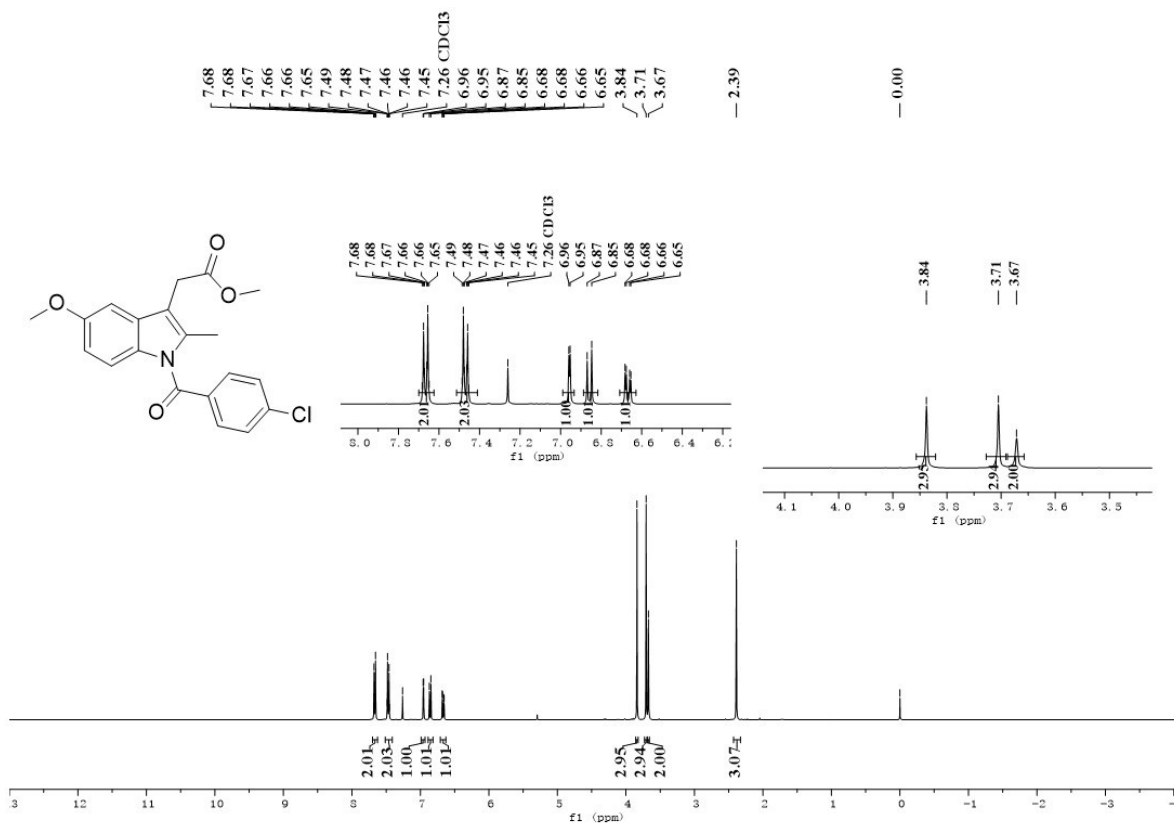

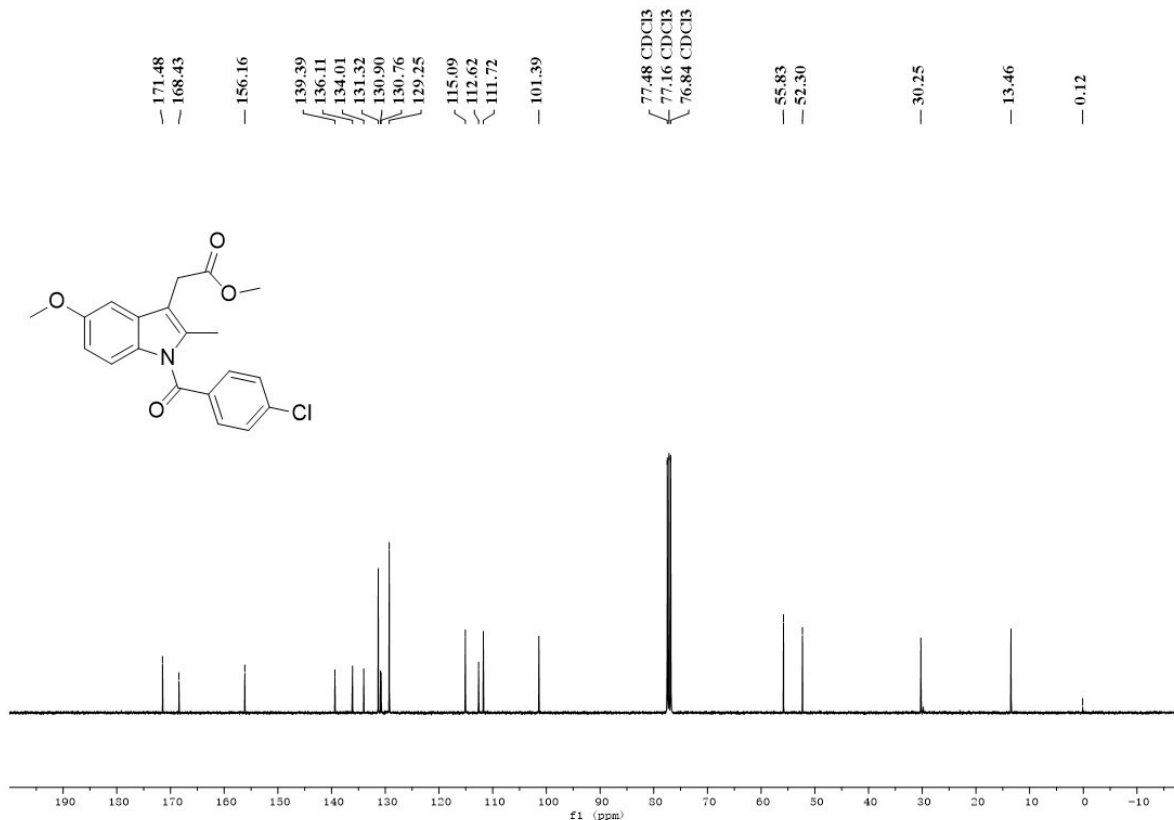

**4cj** (tert-butyl (3R,4S)-3-((benzo[d][1,3]dioxol-5-yloxy)methyl)-4-(4-fluorophenyl)piperidine-1-carboxylate)

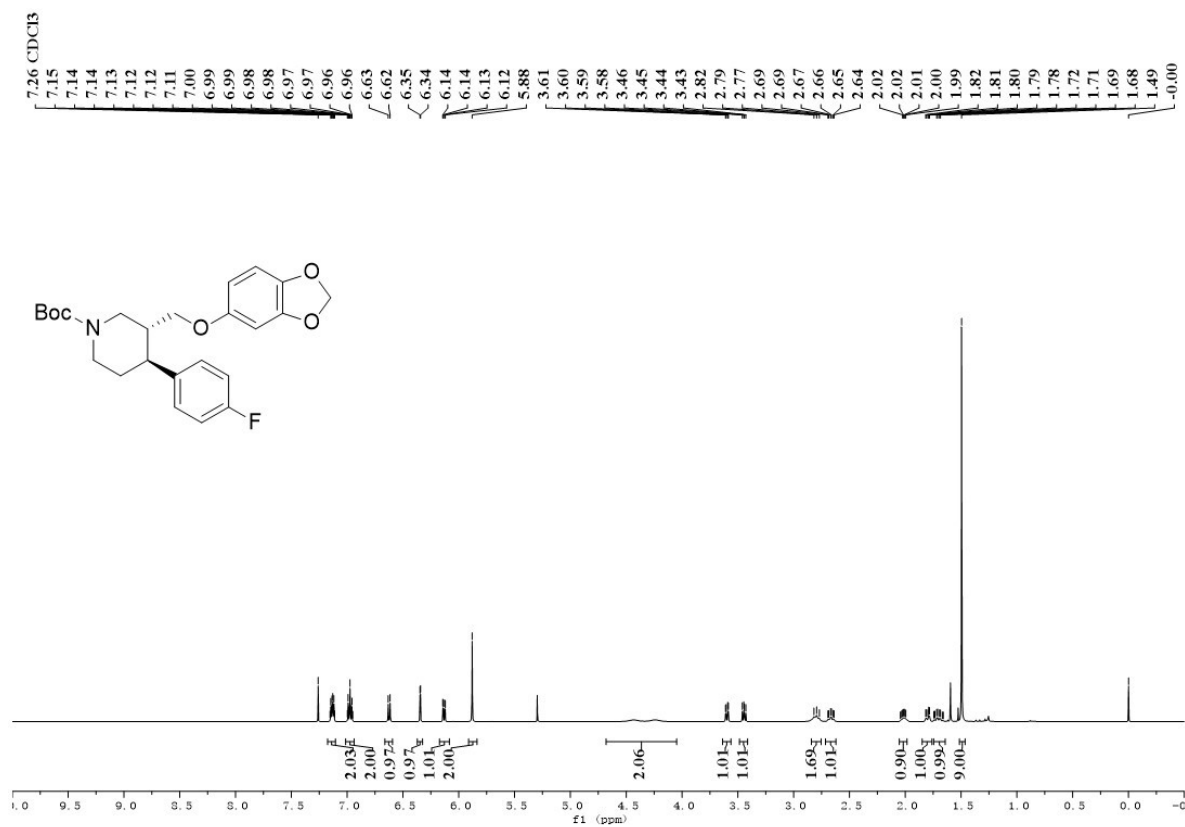

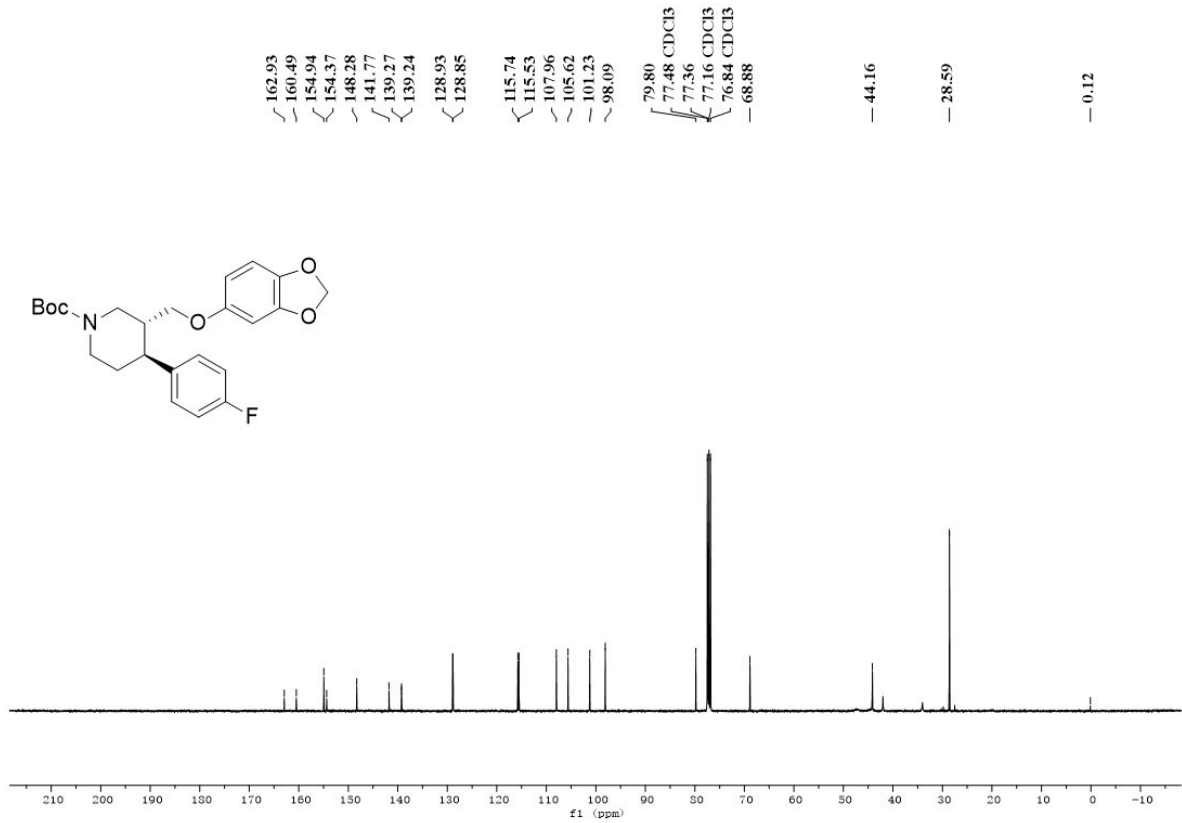

**4ck** (methyl 2-((2,6-dichlorophenyl)amino)phenyl)acetate)

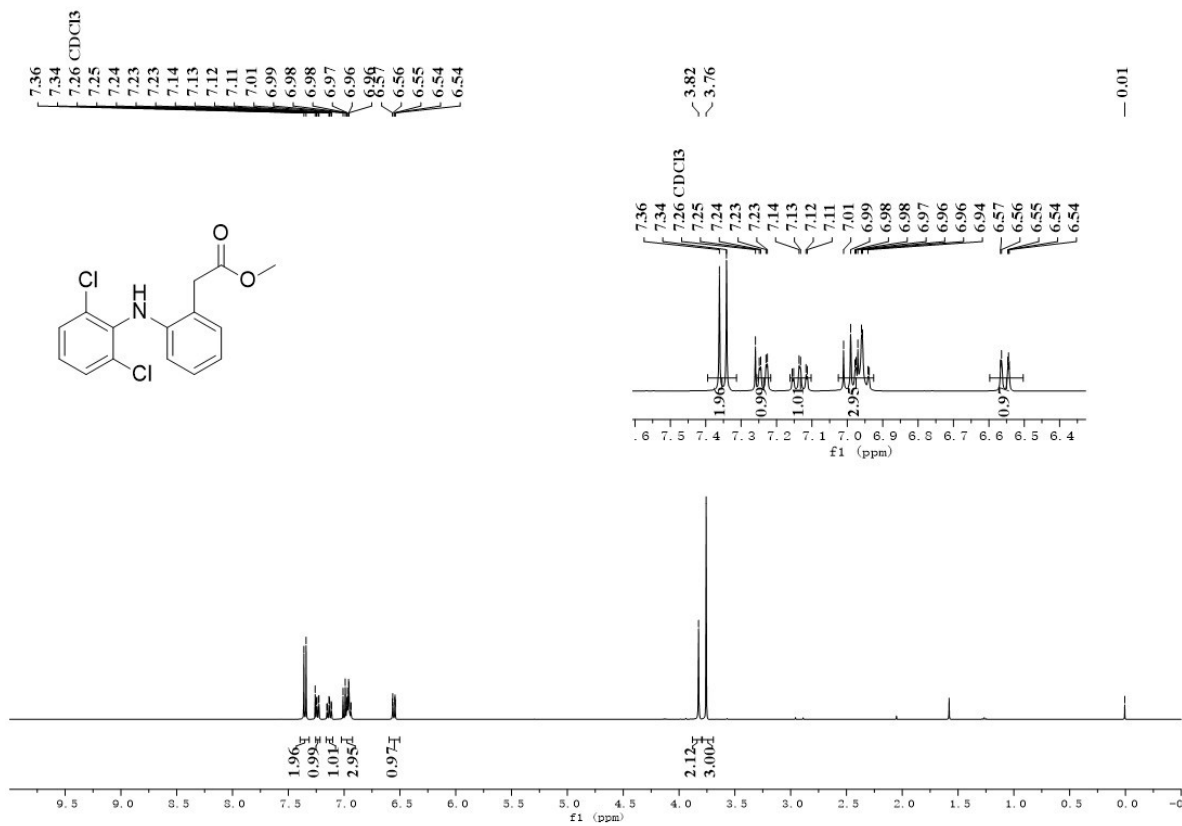



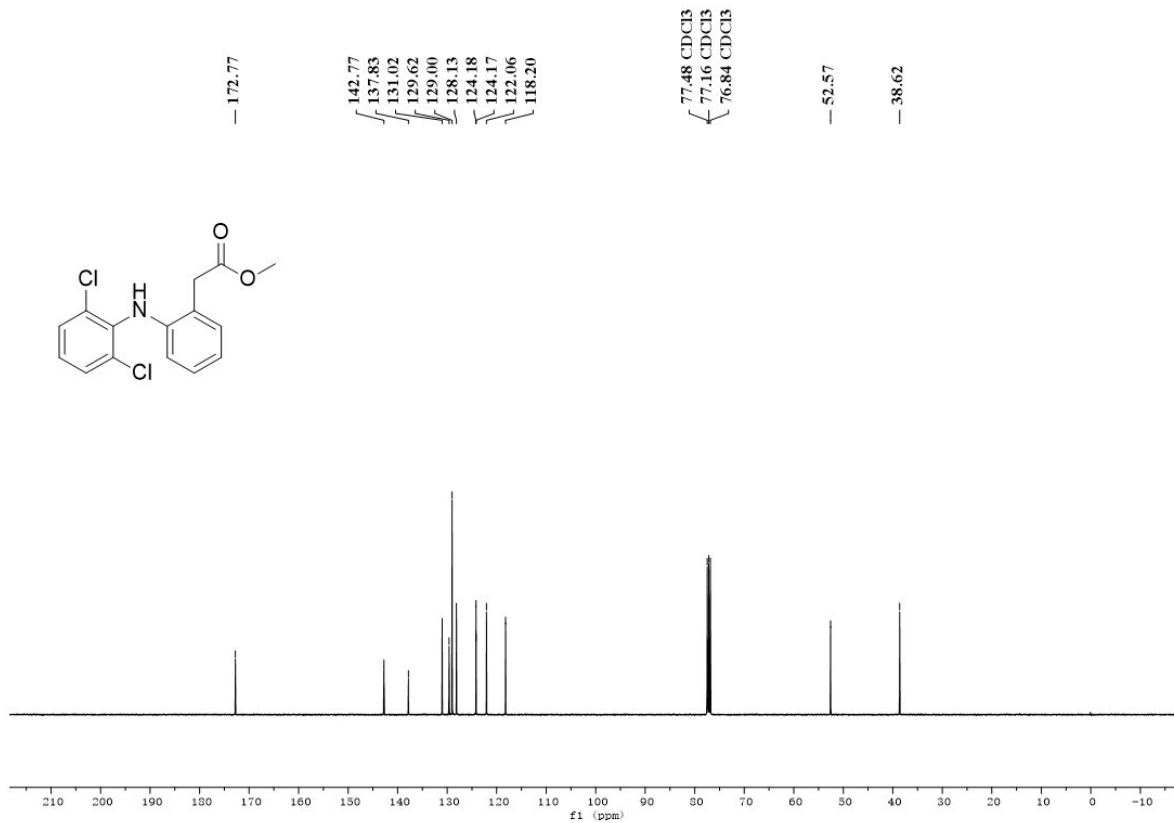

**5aa ((4-methoxyphenyl)(trifluoromethyl)selane)**

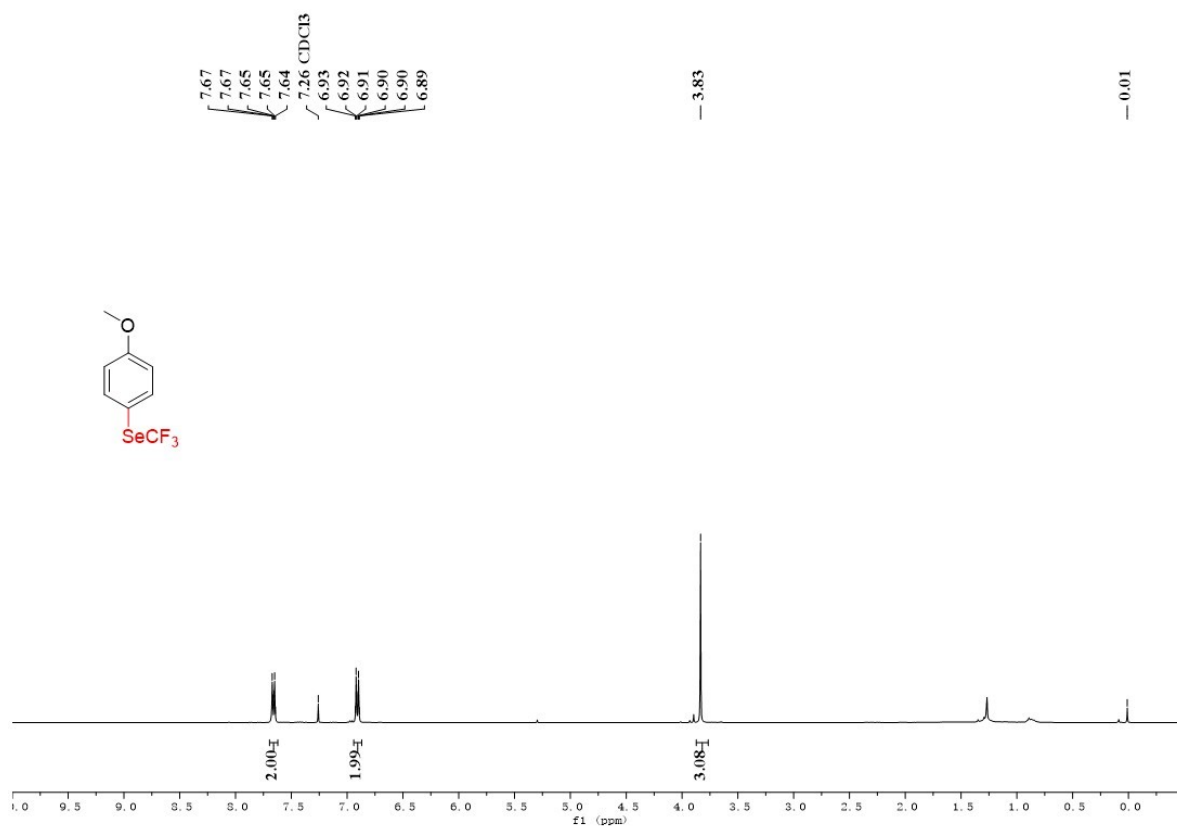

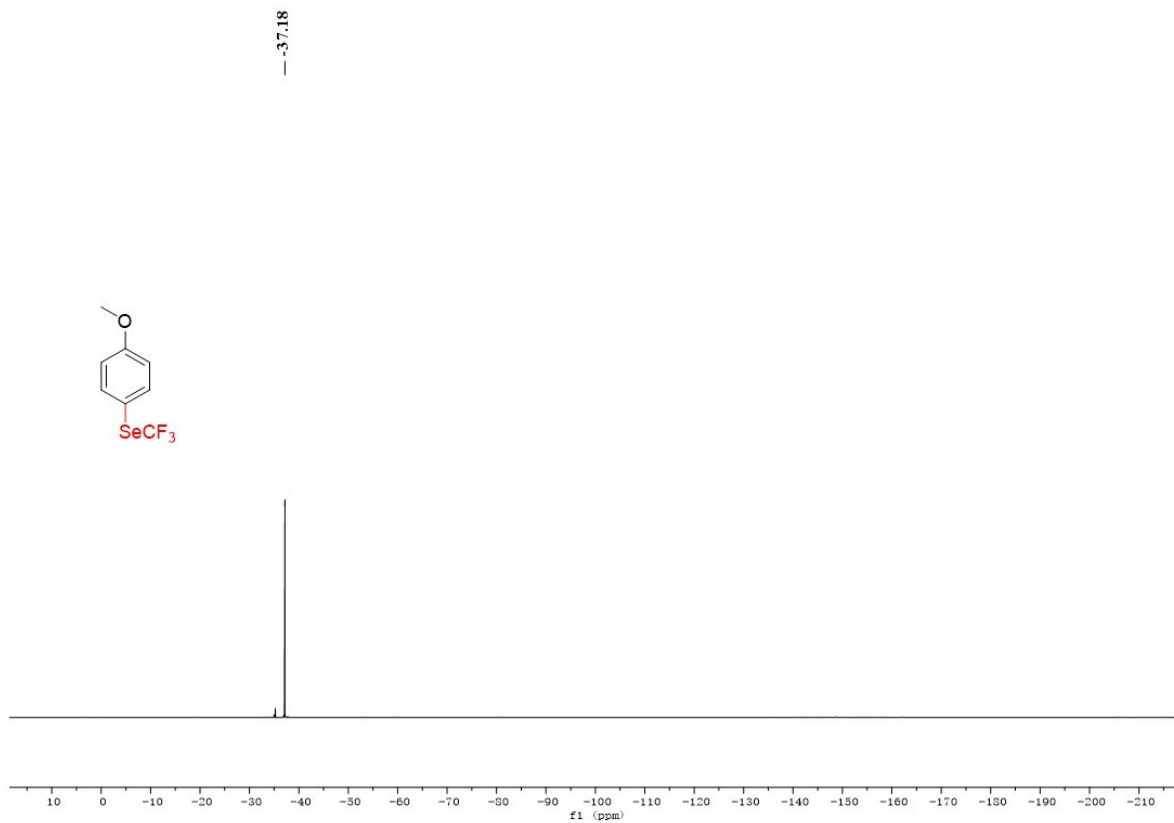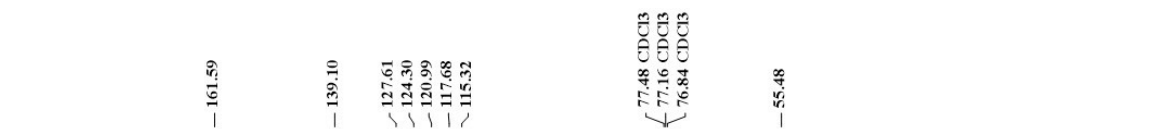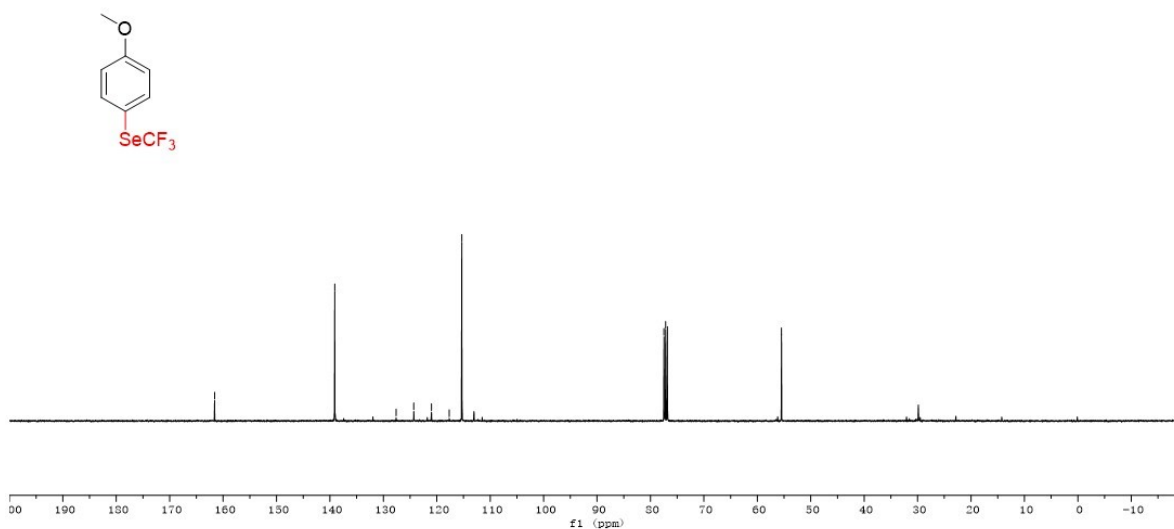

**5ab** ((2-methoxy-5-methylphenyl)(trifluoromethyl)selane)

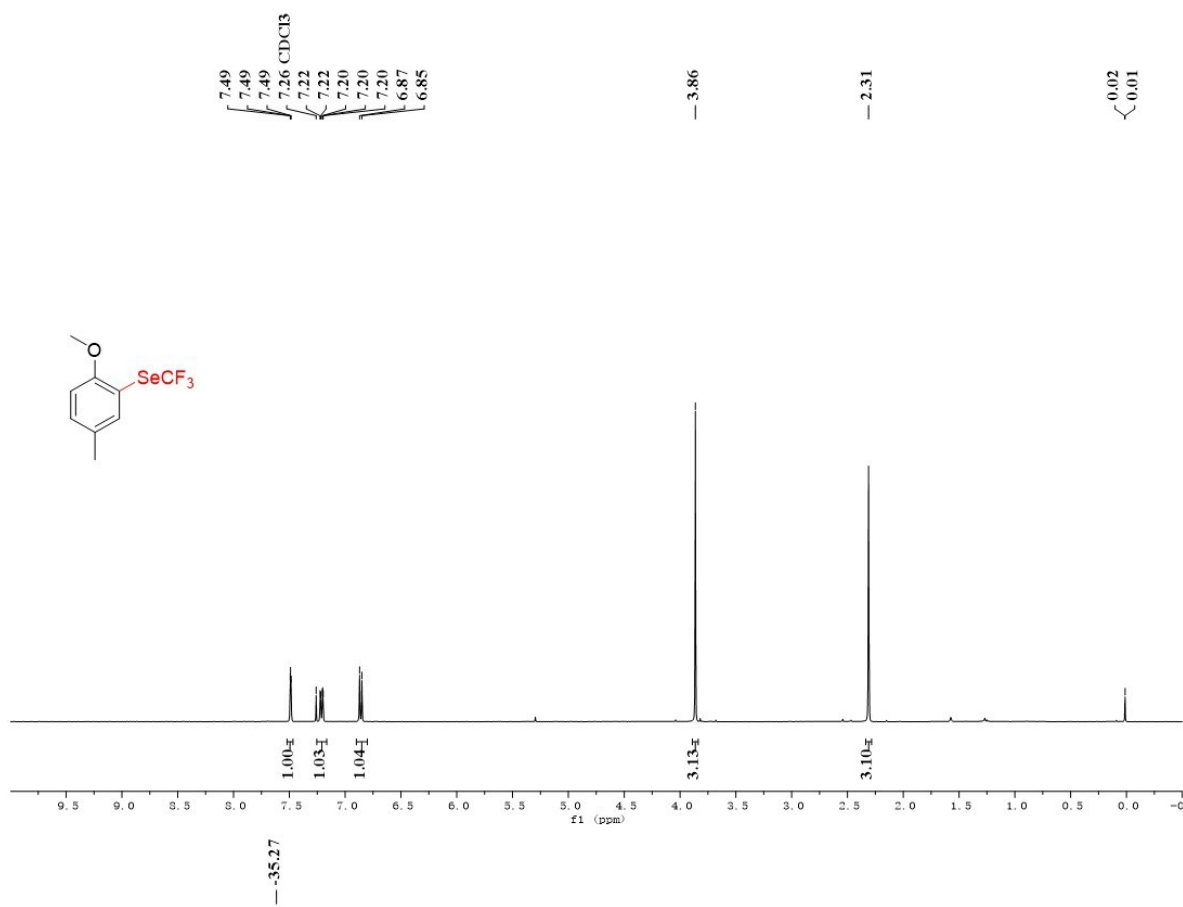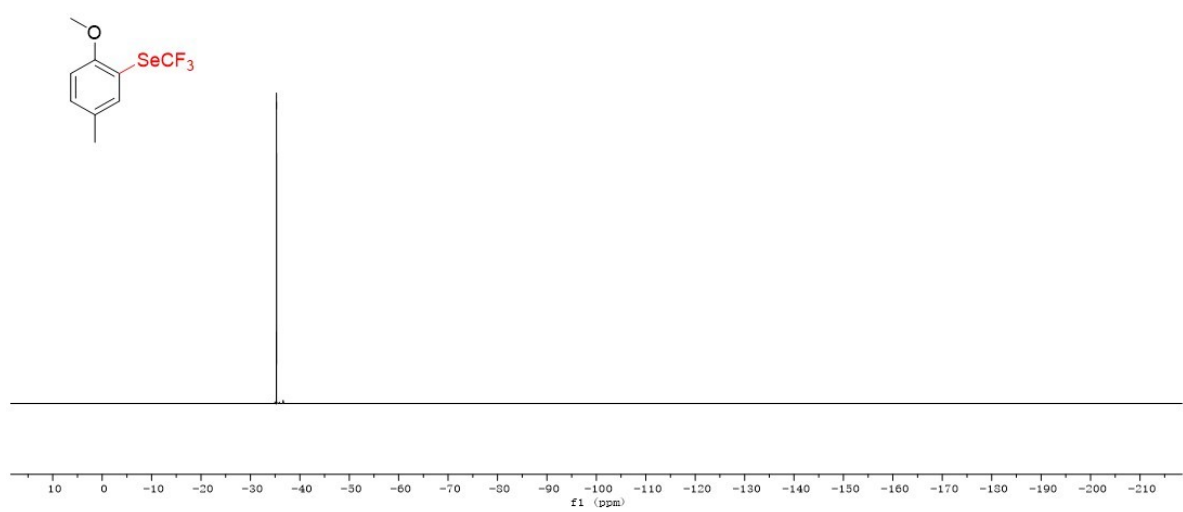

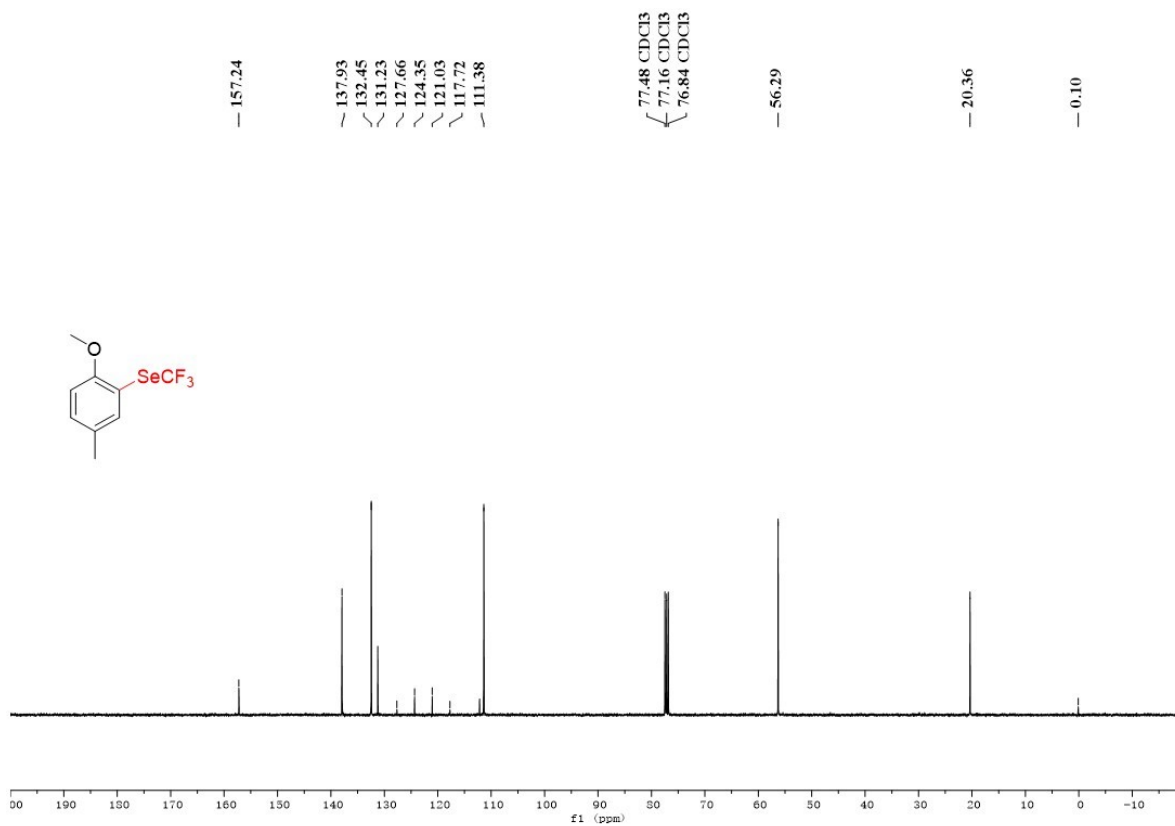

**5ac** (2,5-dimethoxy-4-((trifluoromethyl)selenyl)benzaldehyde)

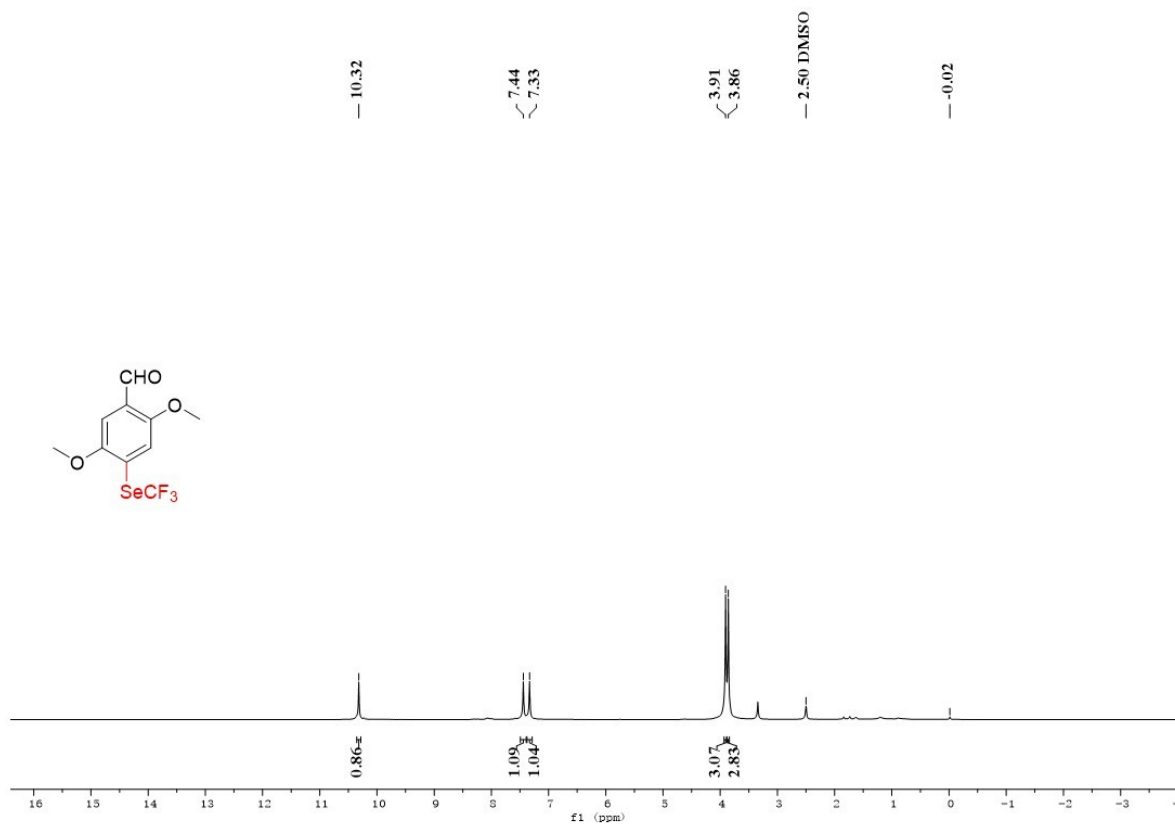

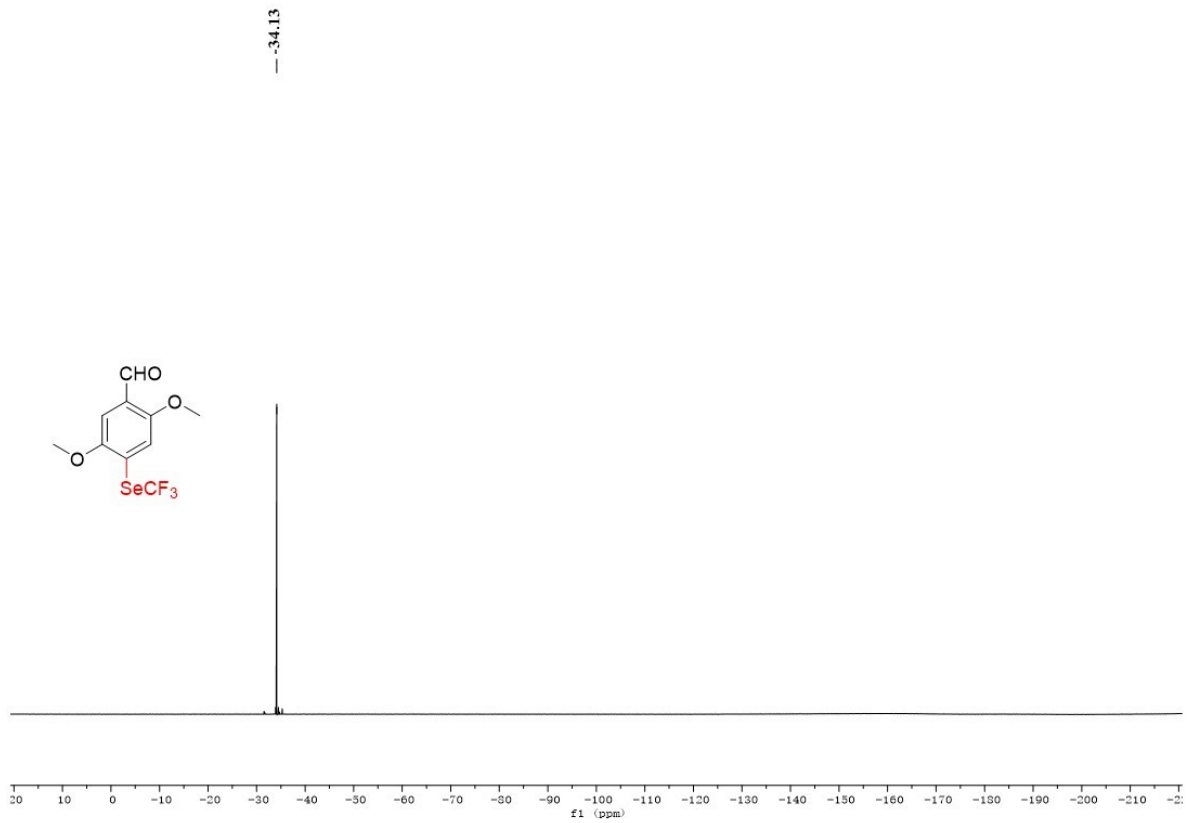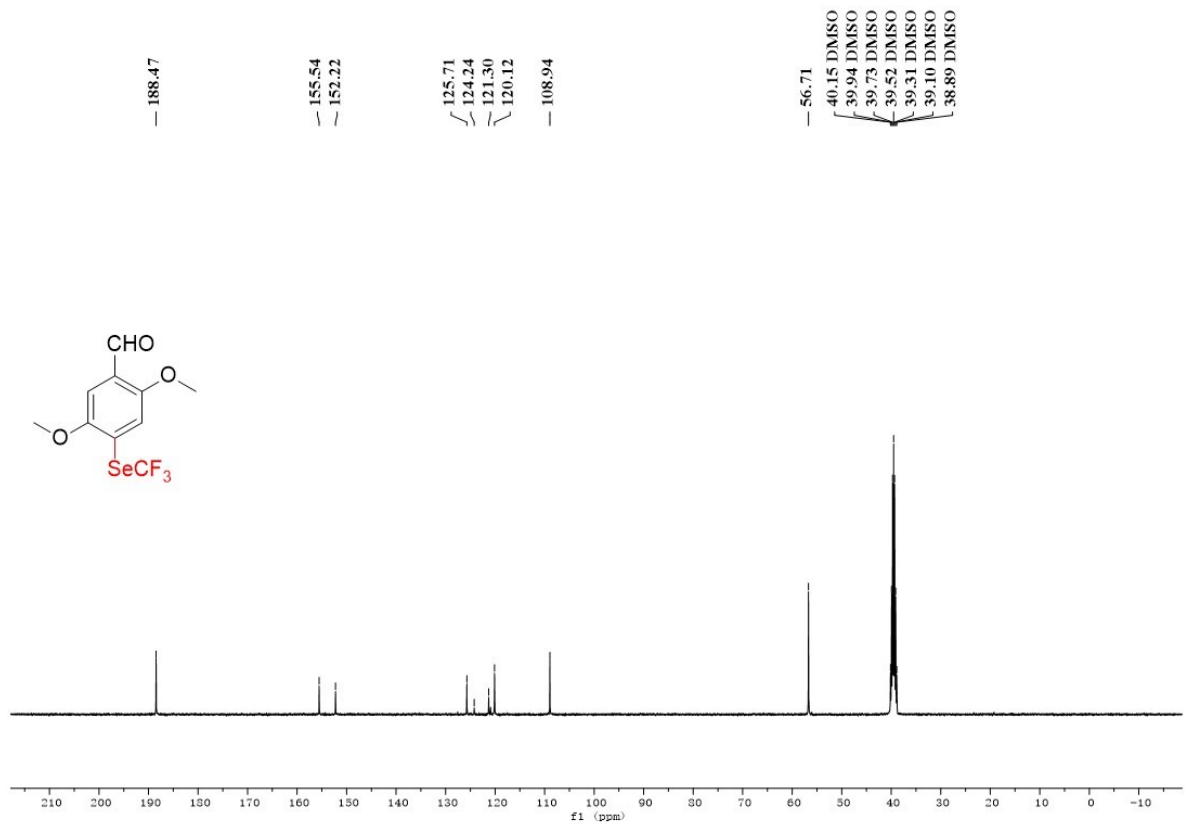

**5ad**, A:B = 5:4

A (2,3-dimethoxy-5-((trifluoromethyl)selanyl)benzaldehyde)

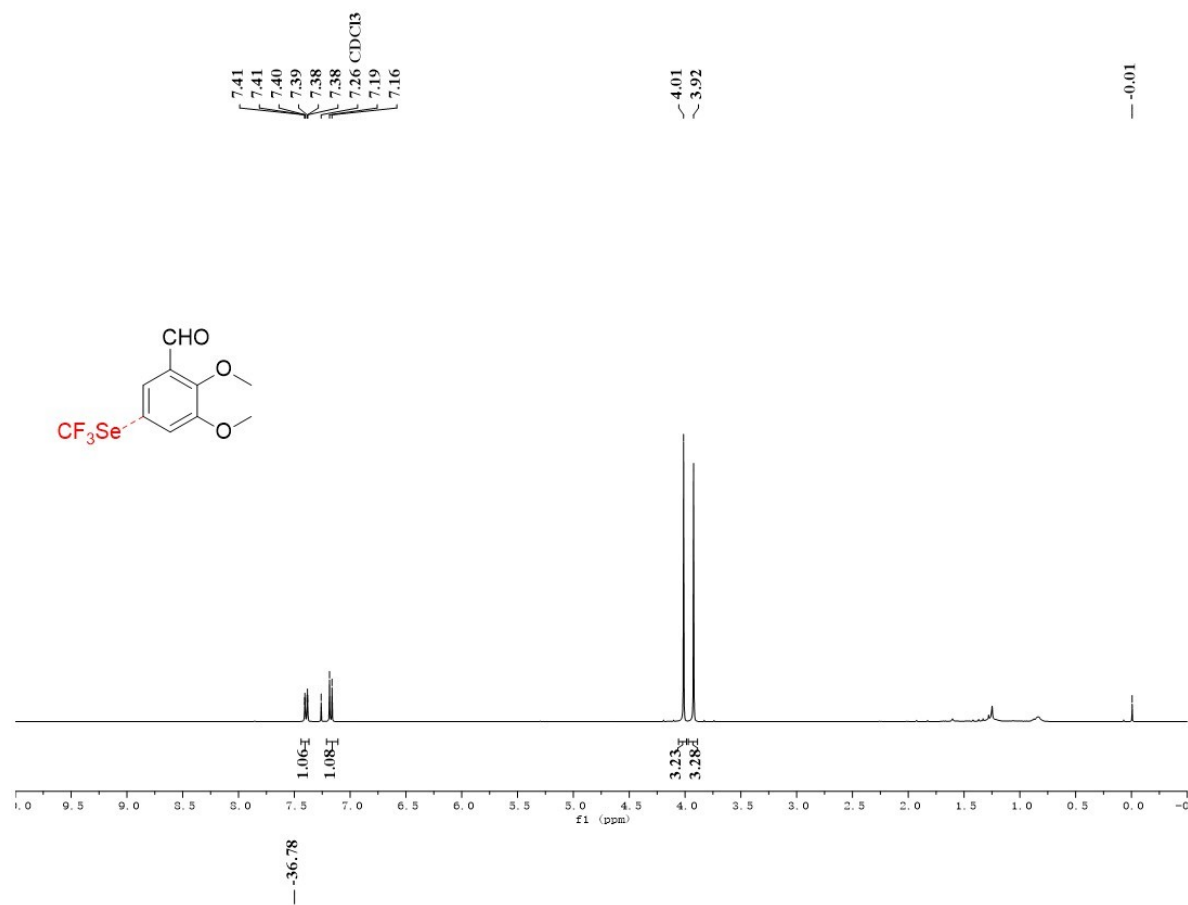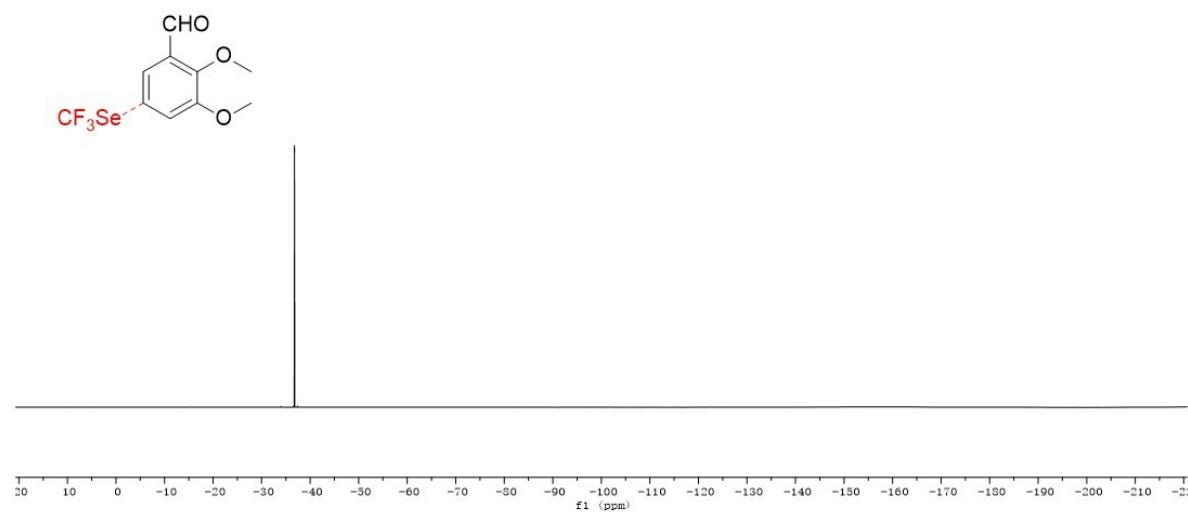

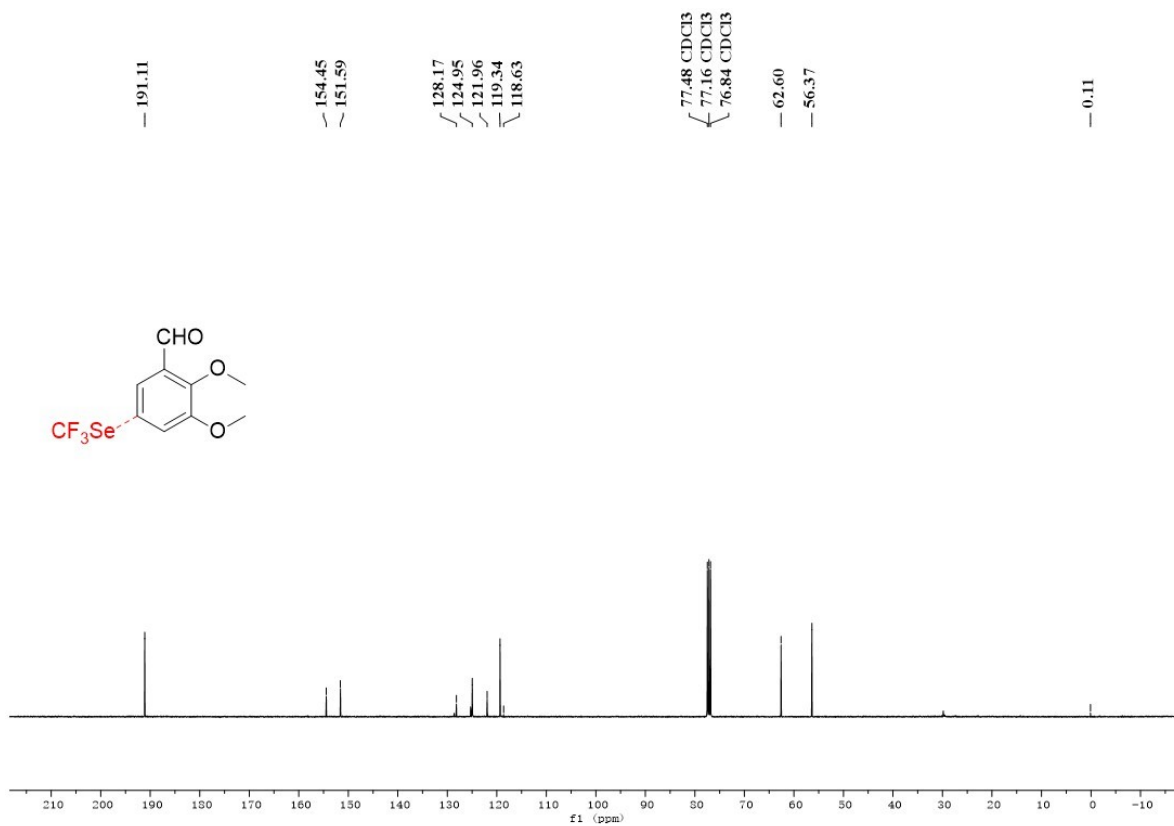

**5ad B (2,3-dimethoxy-6-((trifluoromethyl)selenyl)benzaldehyde)**

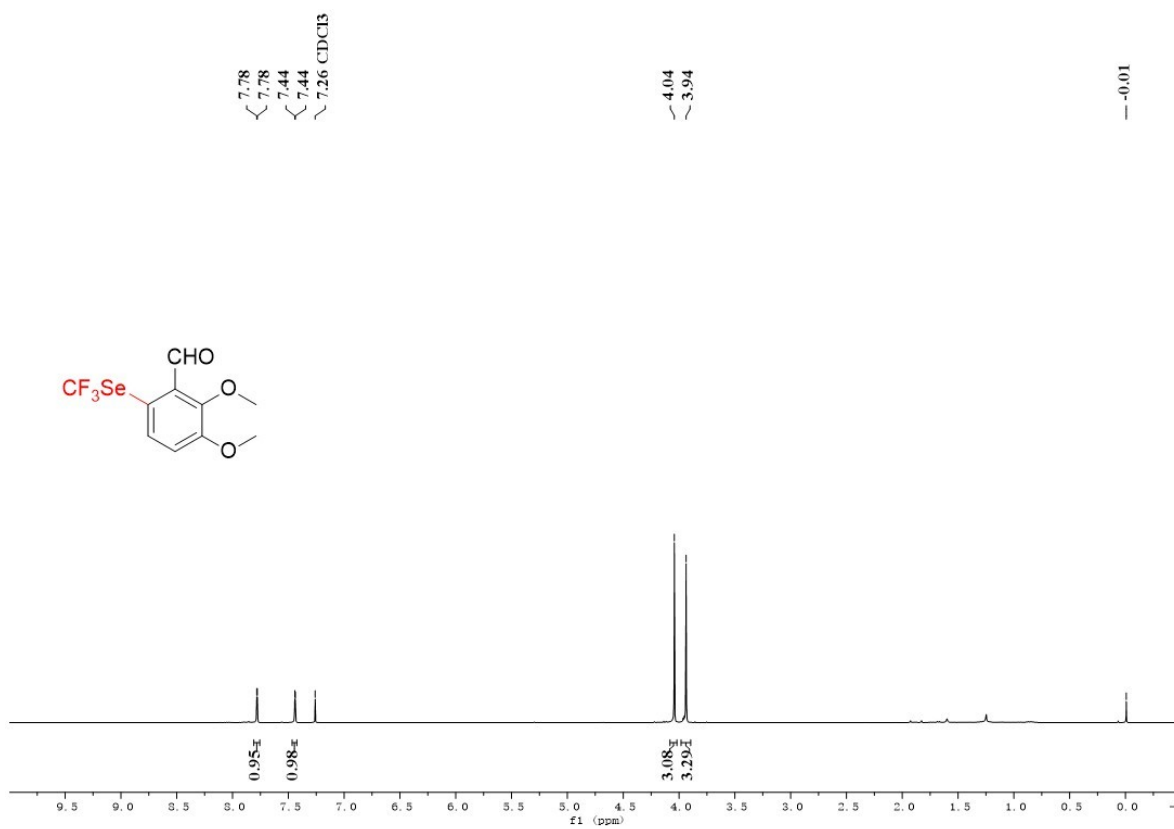

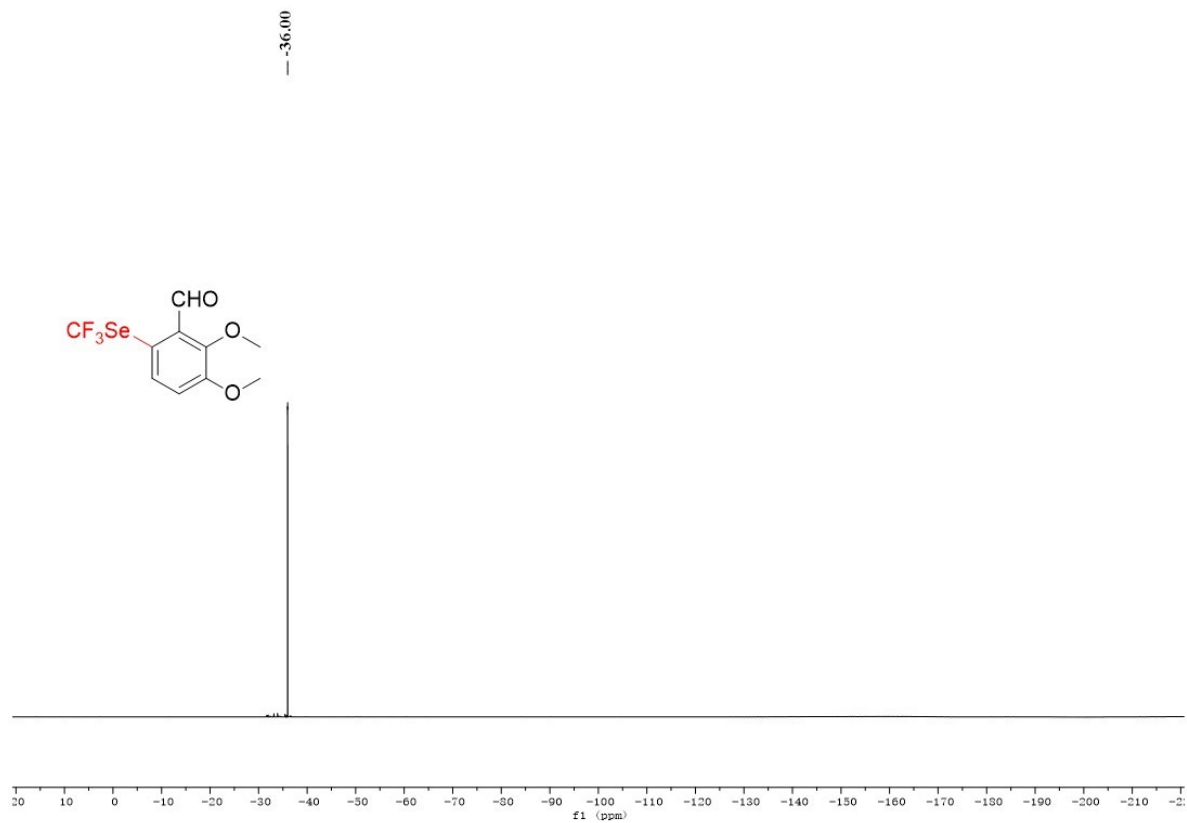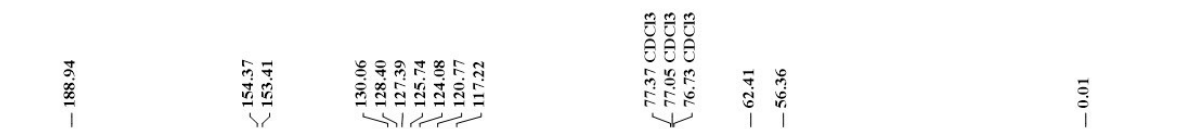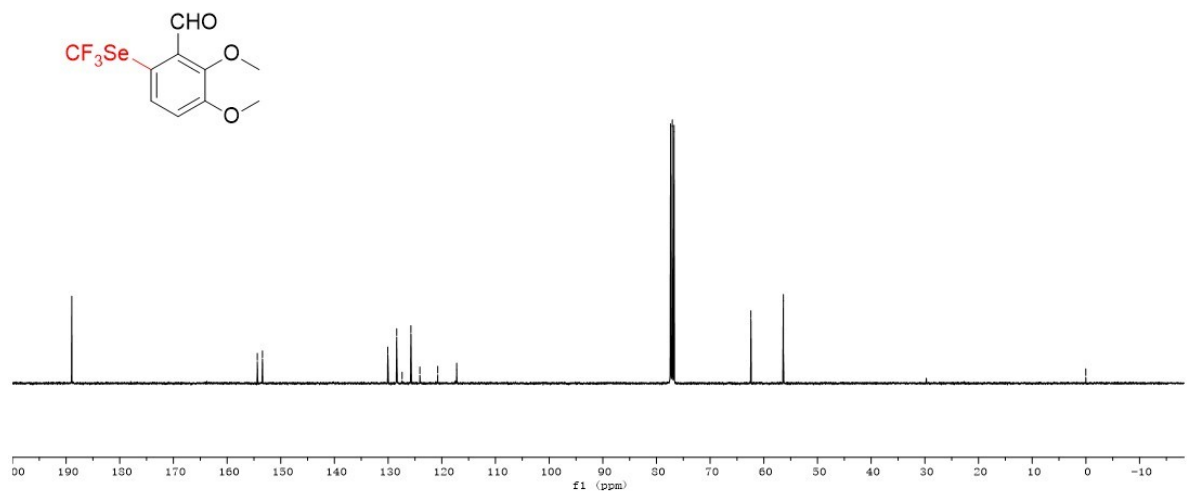



**5ae** (2-hydroxy-4-methoxy-5-((trifluoromethyl)selenanyl)benzaldehyde)

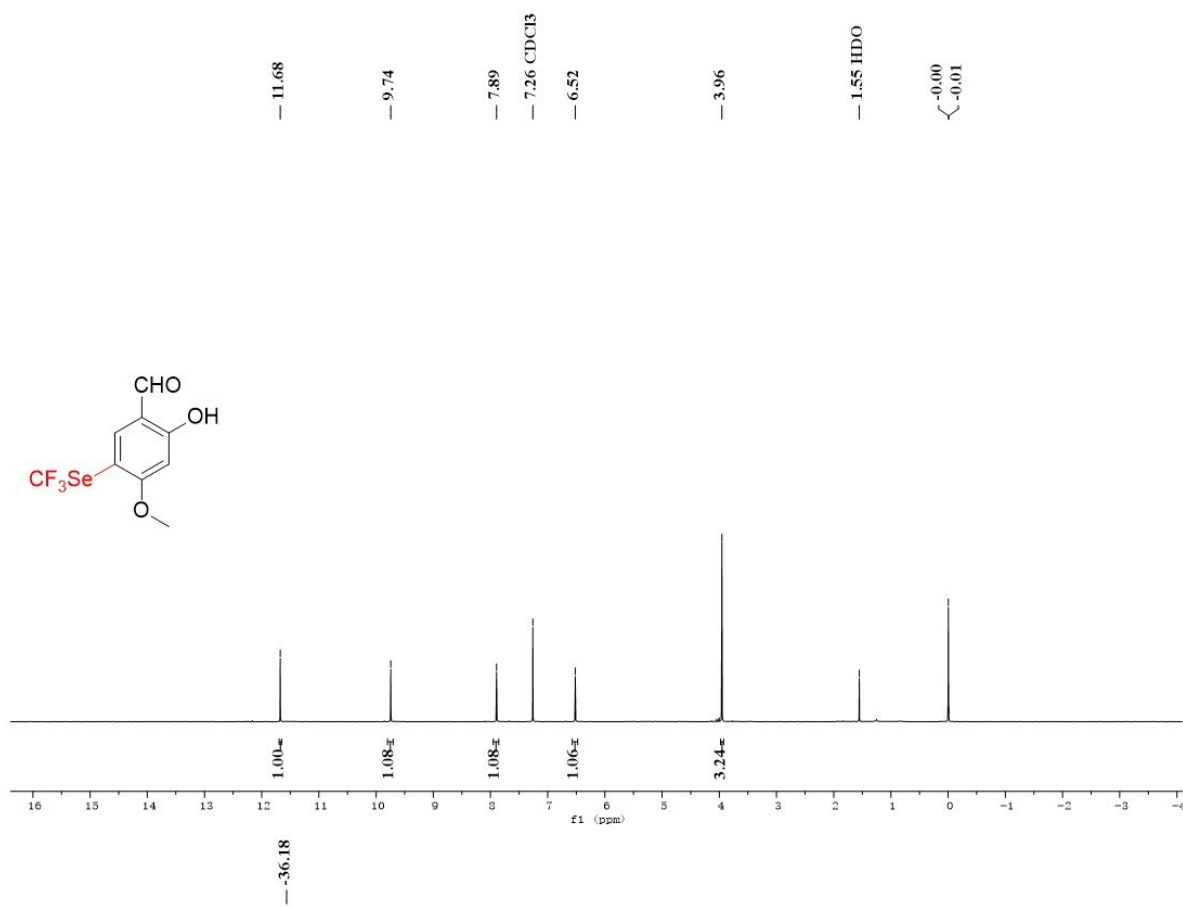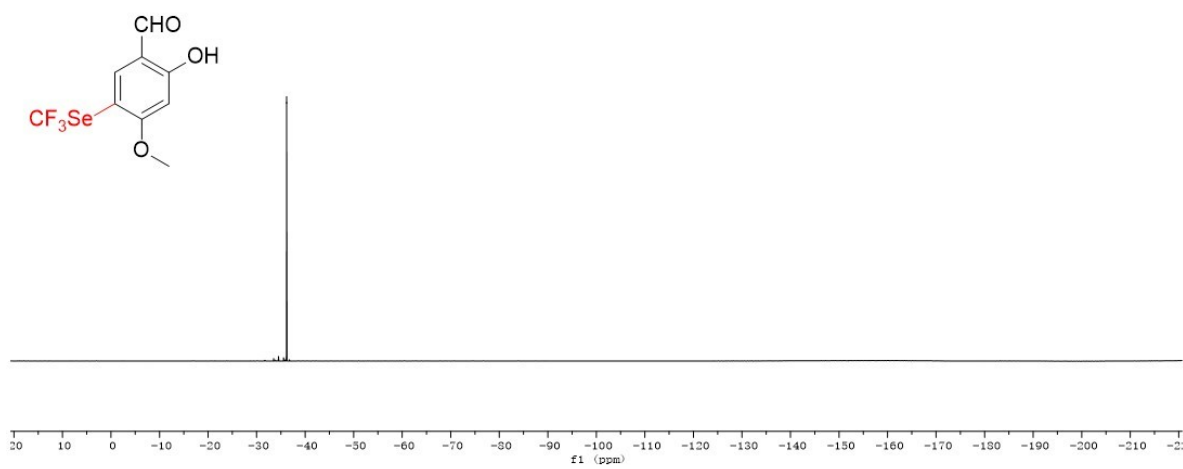

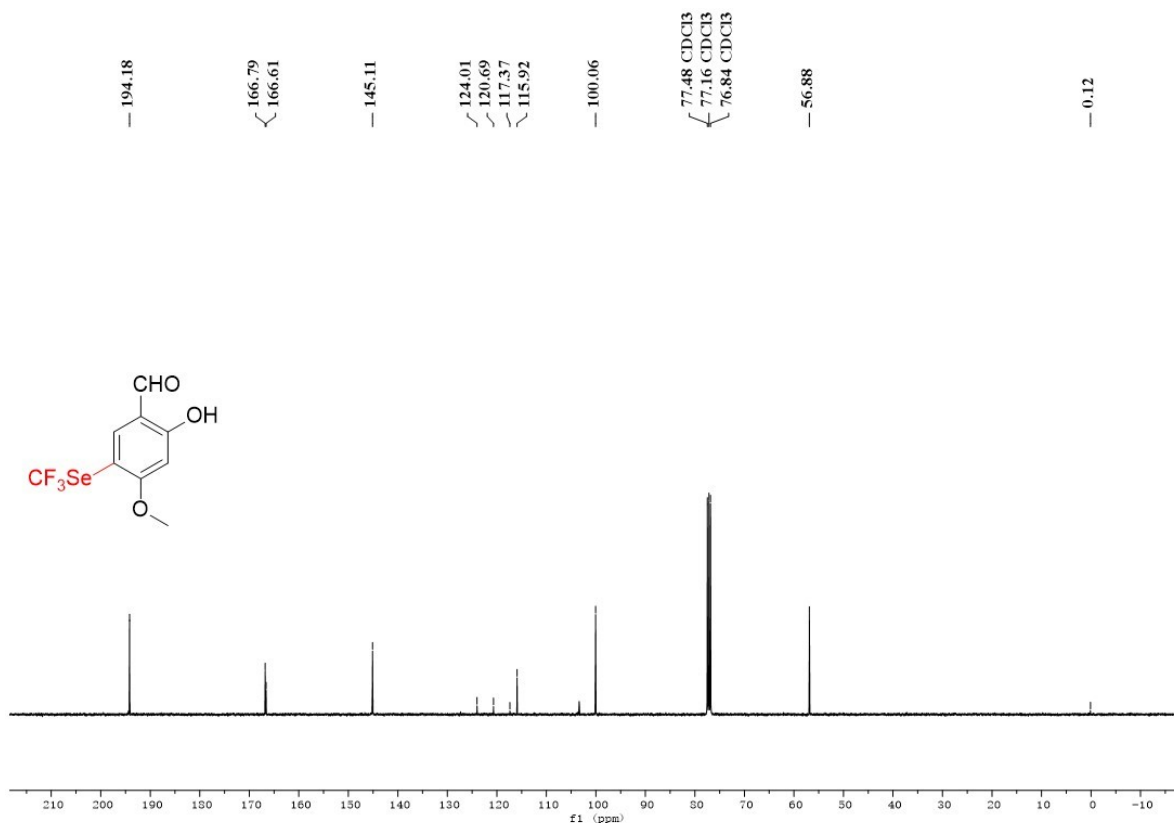

**5af** (A: (2-bromo-4,6-dimethoxyphenyl)(trifluoromethyl)selane; B: (4-bromo-2,6-dimethoxyphenyl)(trifluoromethyl)selane)

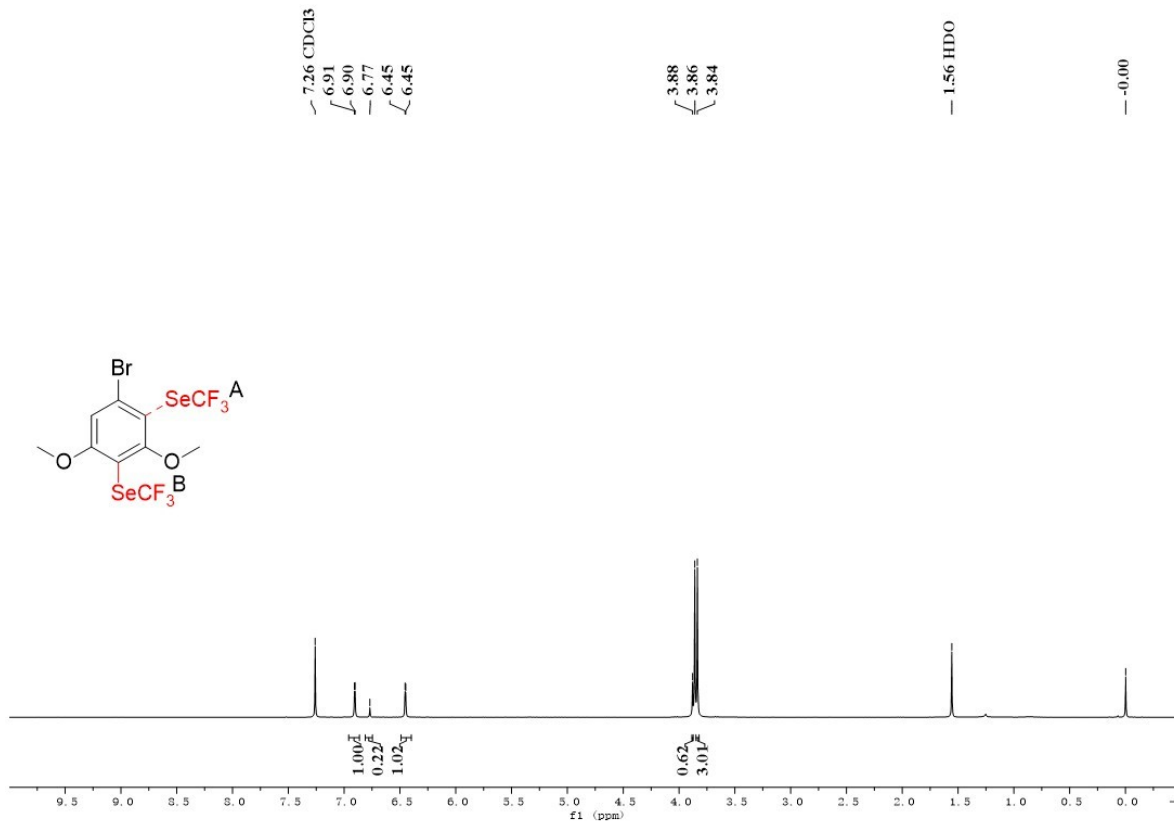

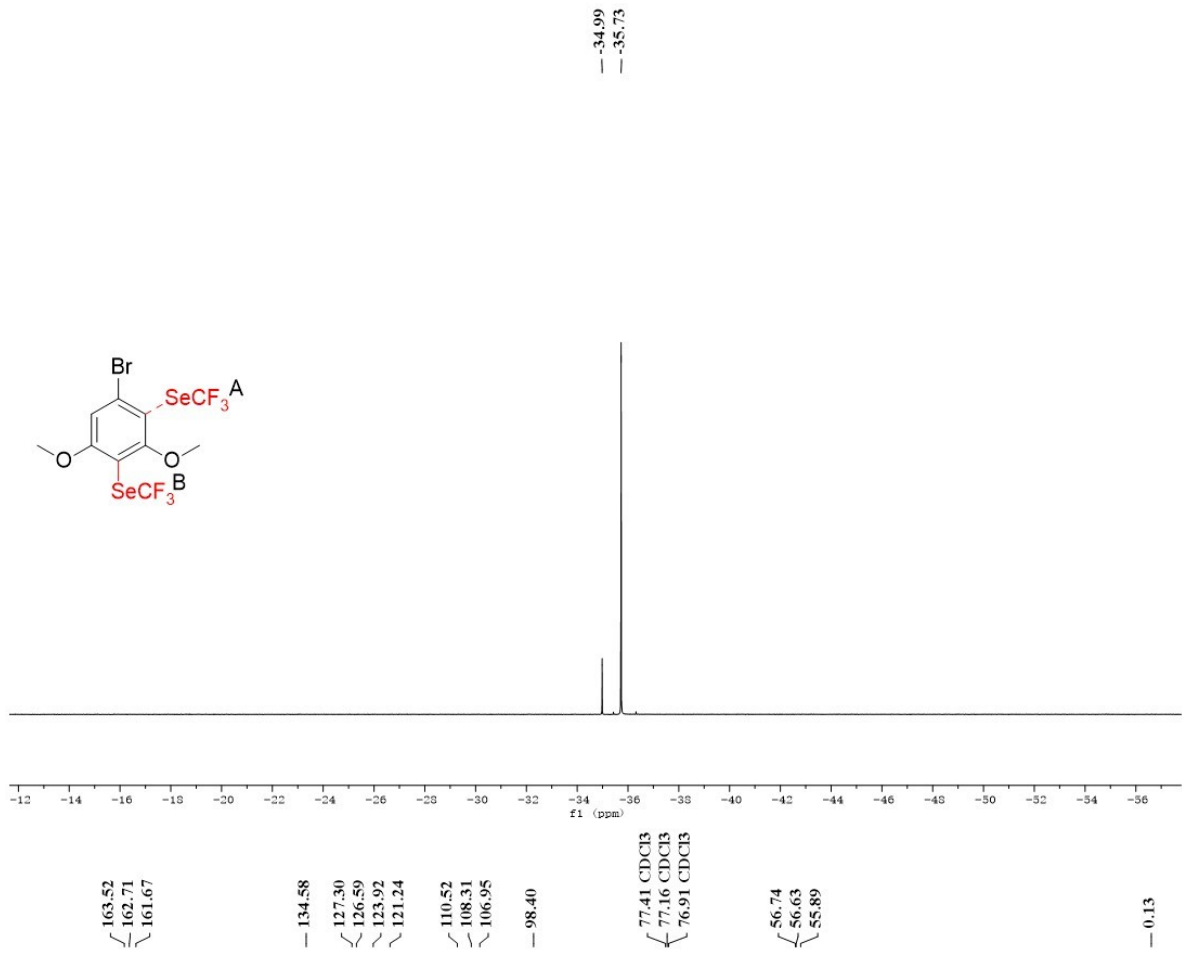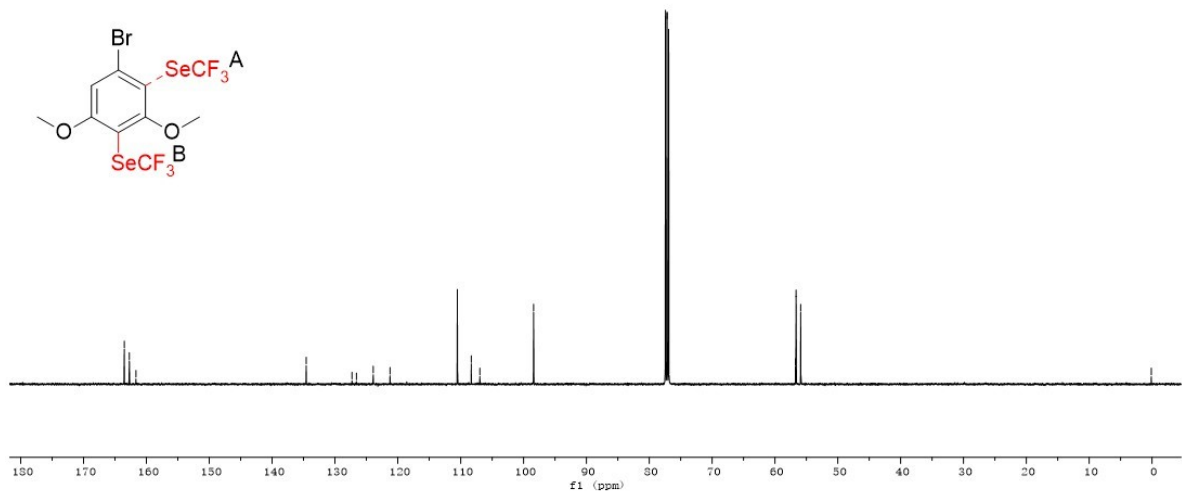

**5ag** (1-(6-methoxy-5-((trifluoromethyl)selanyl)naphthalen-2-yl)ethan-1-one)

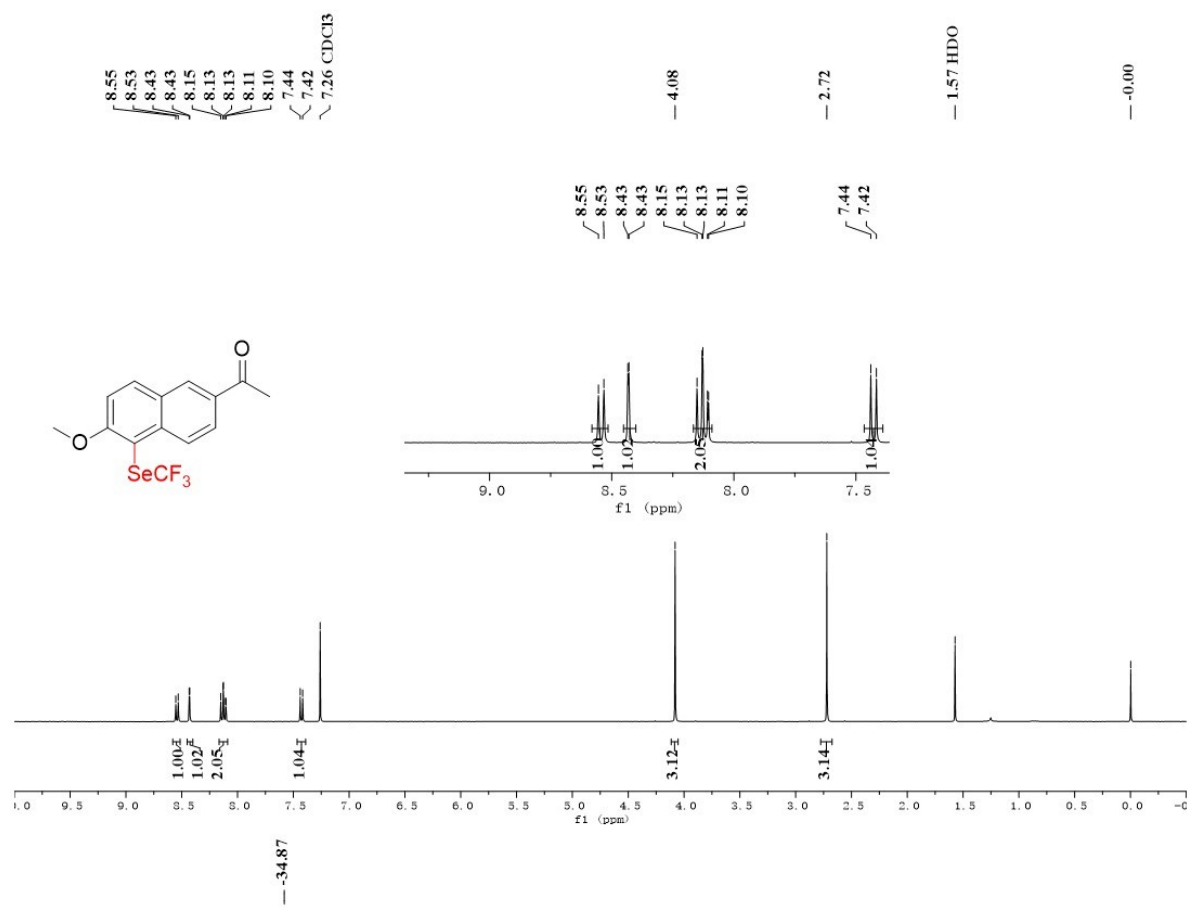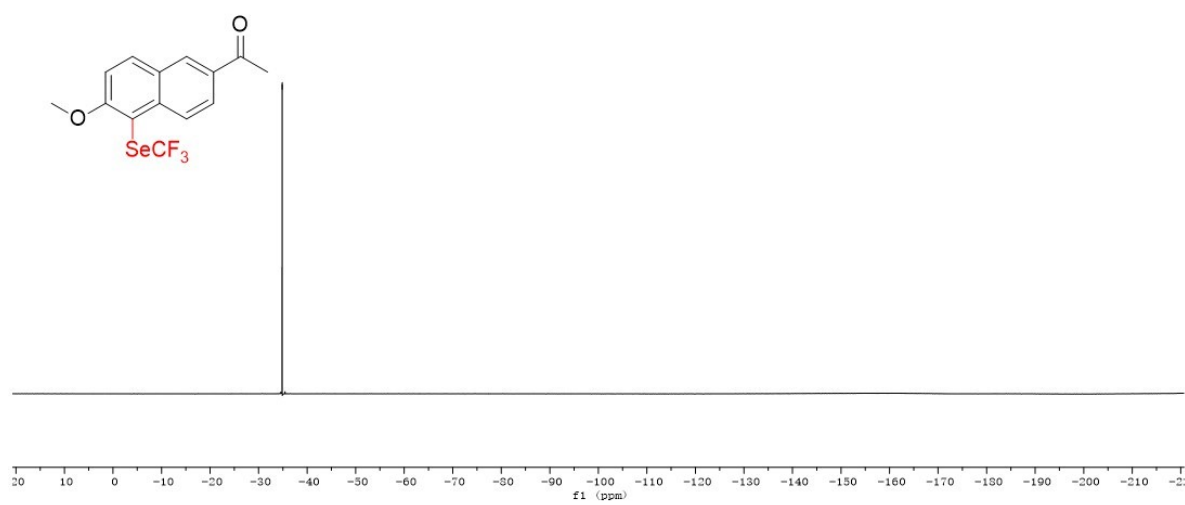

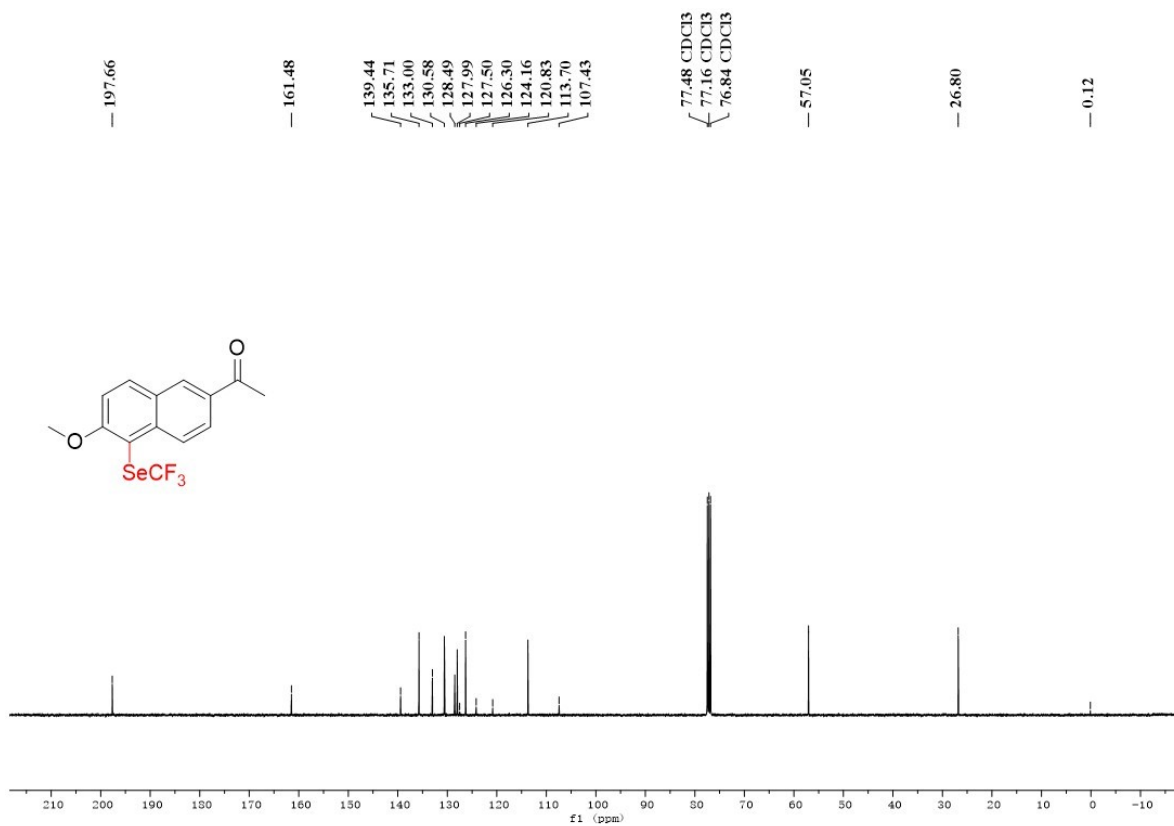

**5ah** (ethyl 2-cyano-2-(4,5-dimethoxy-2-((trifluoromethyl)selenanyl)phenyl)acetate)

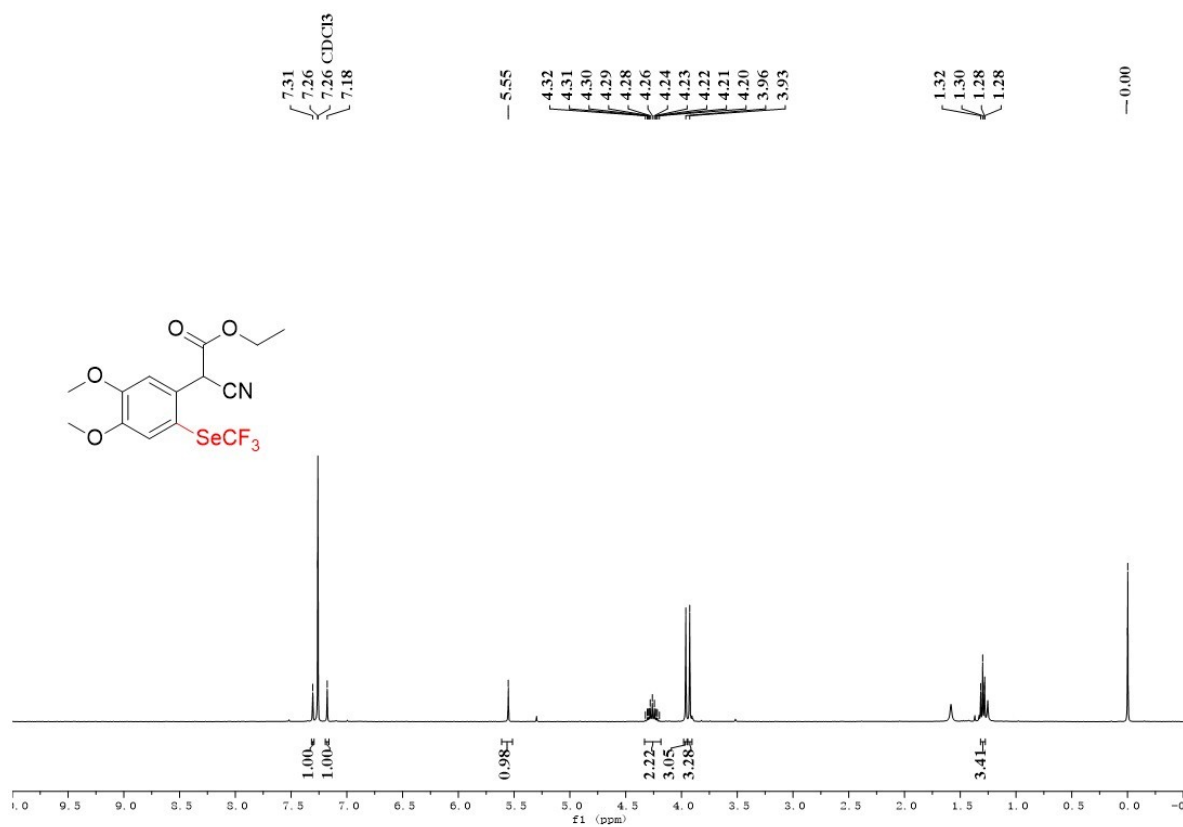

-36.19

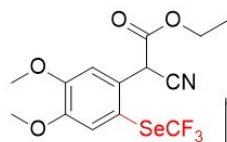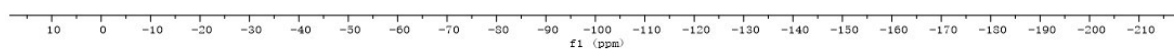

164.93  
152.05  
149.83  
131.03  
128.78  
127.24  
123.92  
121.33  
120.59  
117.27  
115.85  
114.64  
111.23  
77.48 CDCl3  
77.16 CDCl3  
76.84 CDCl3  
63.71  
56.40  
56.35  
43.57  
29.79  
29.75  
13.99  
0.07

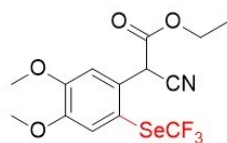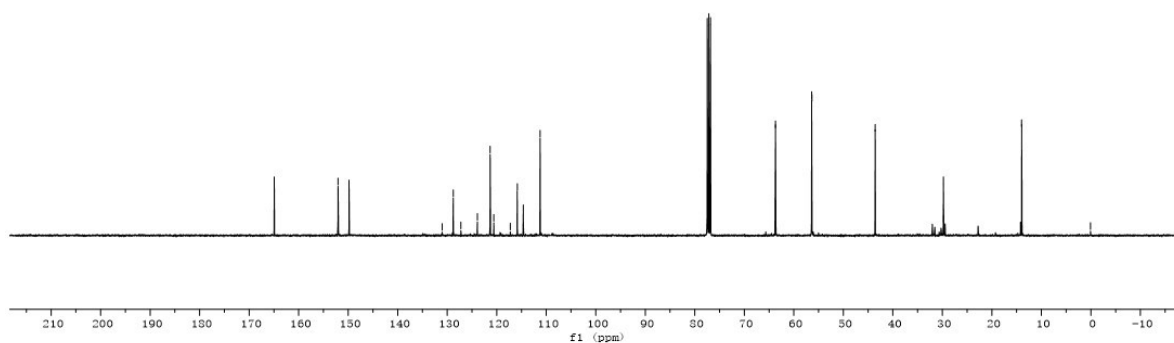

**5ai** (benzyl (4-methoxy-3-((trifluoromethyl)selanyl)benzyl)carbamate)

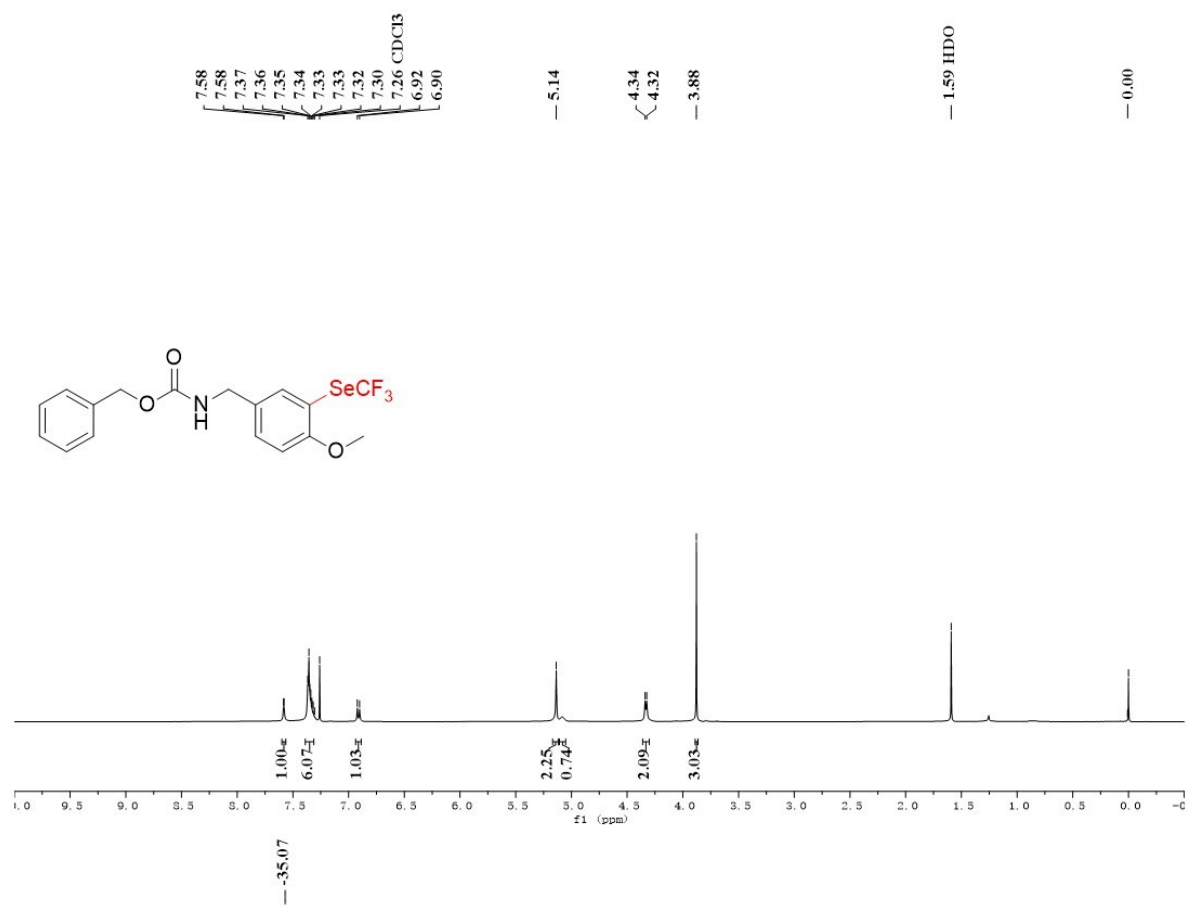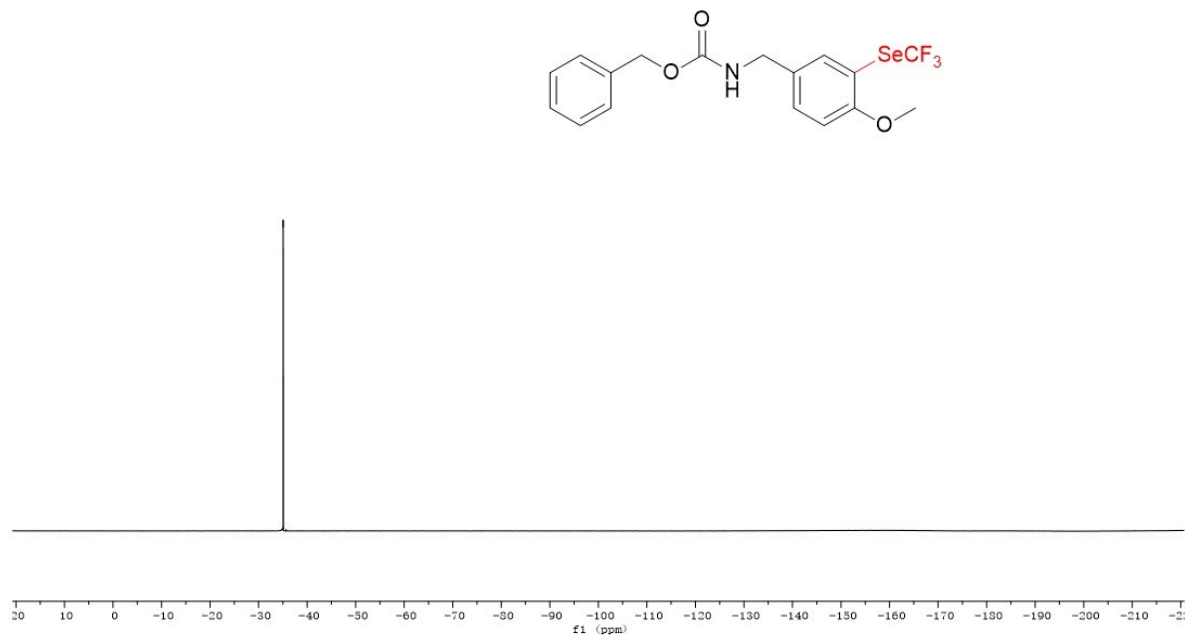

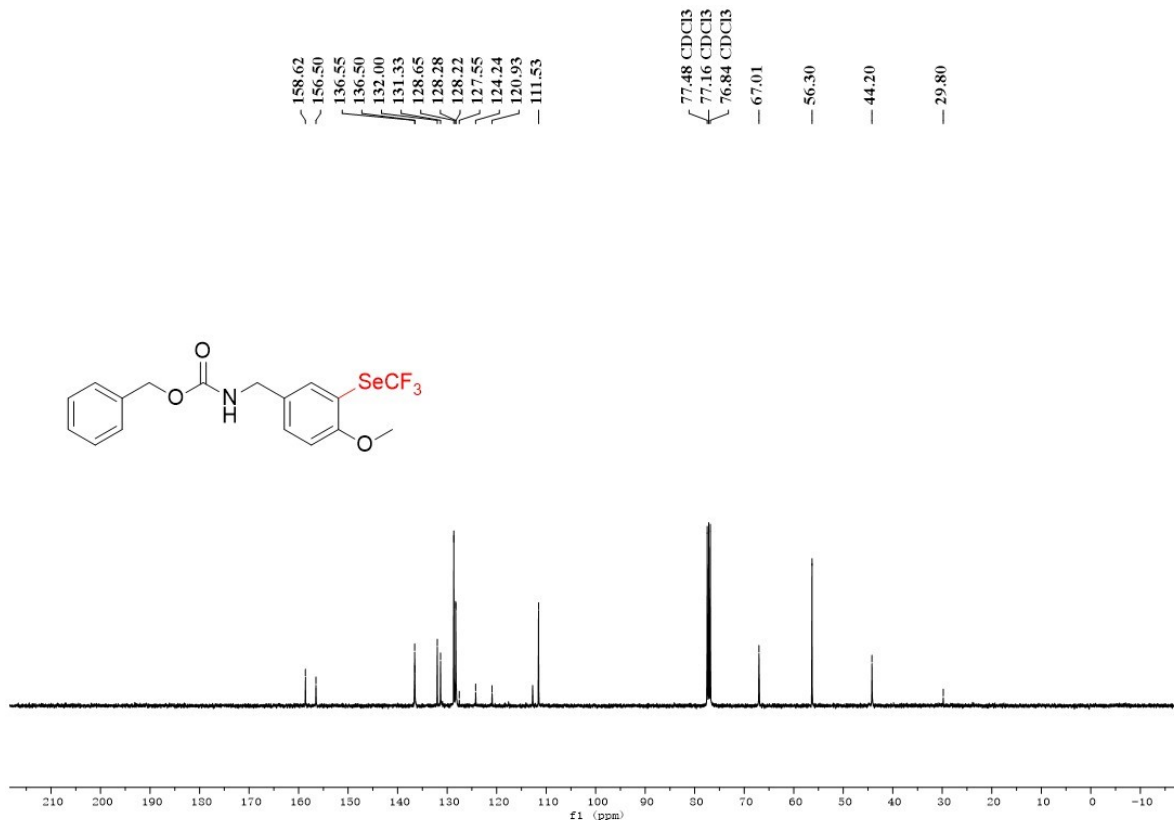

**5aj** (ethyl 2-(4-((trifluoromethyl)selenyl)phenoxy)acetate)

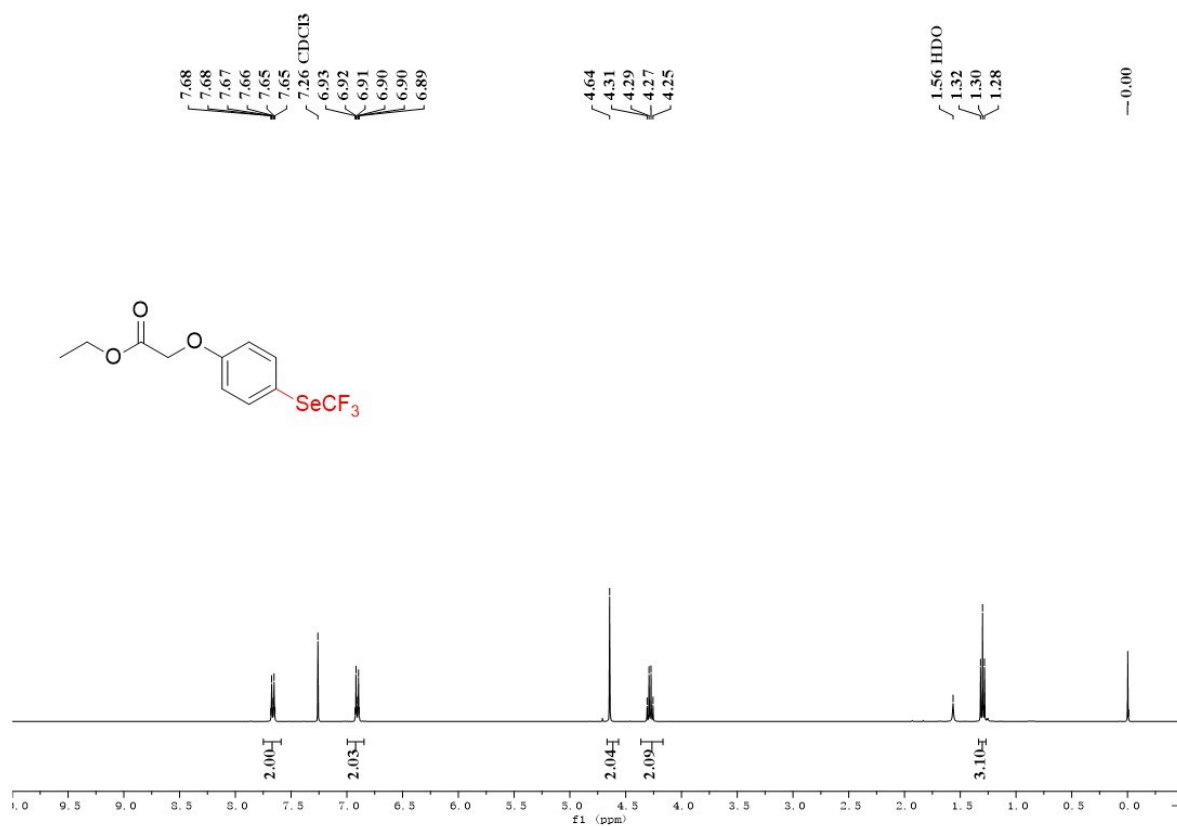



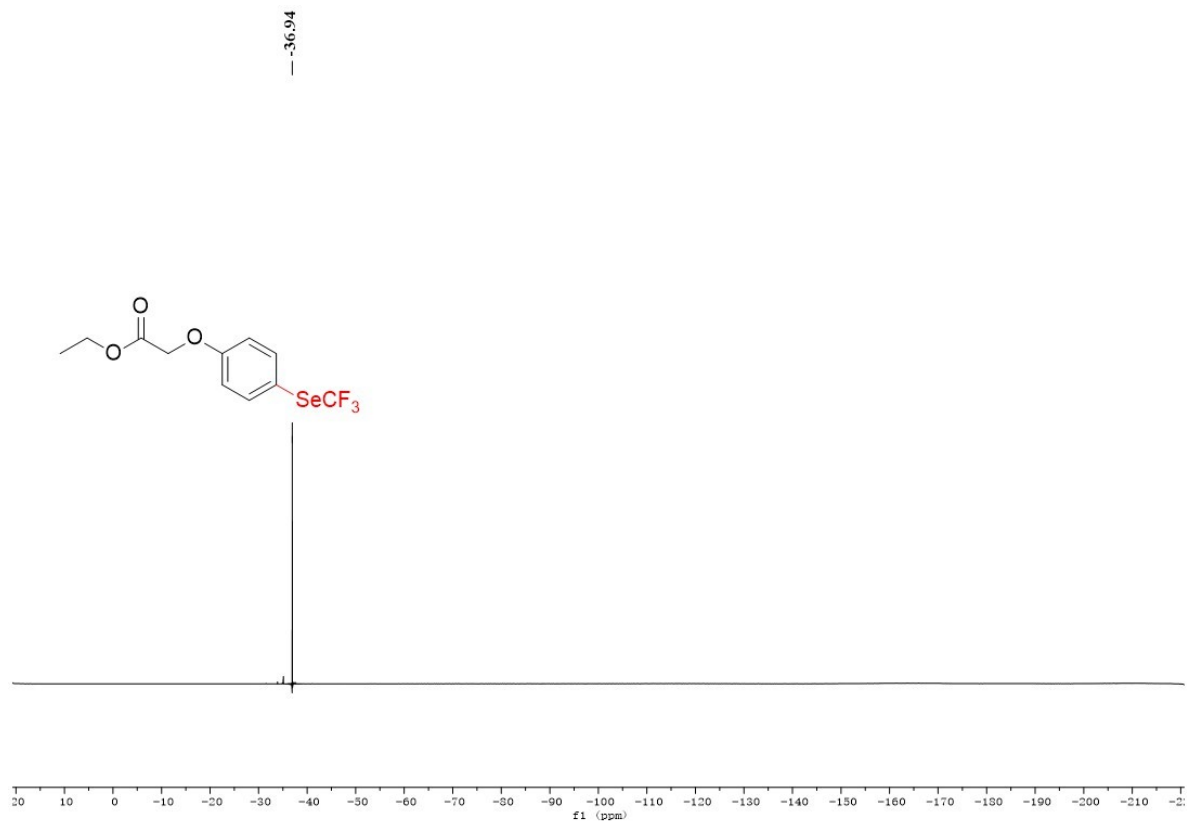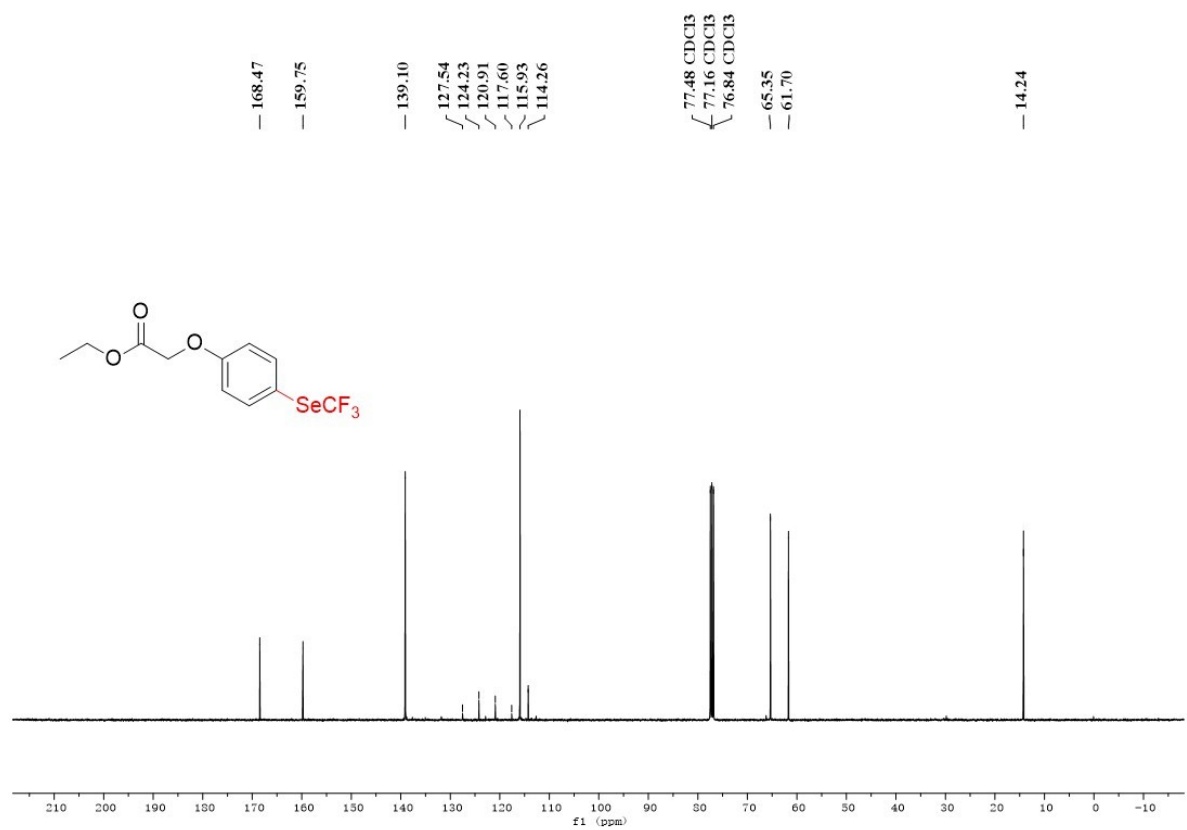

**5ak** ((2-bromo-4-((trifluoromethyl)selanyl)phenoxy)(tert-butyl)dimethylsilane)

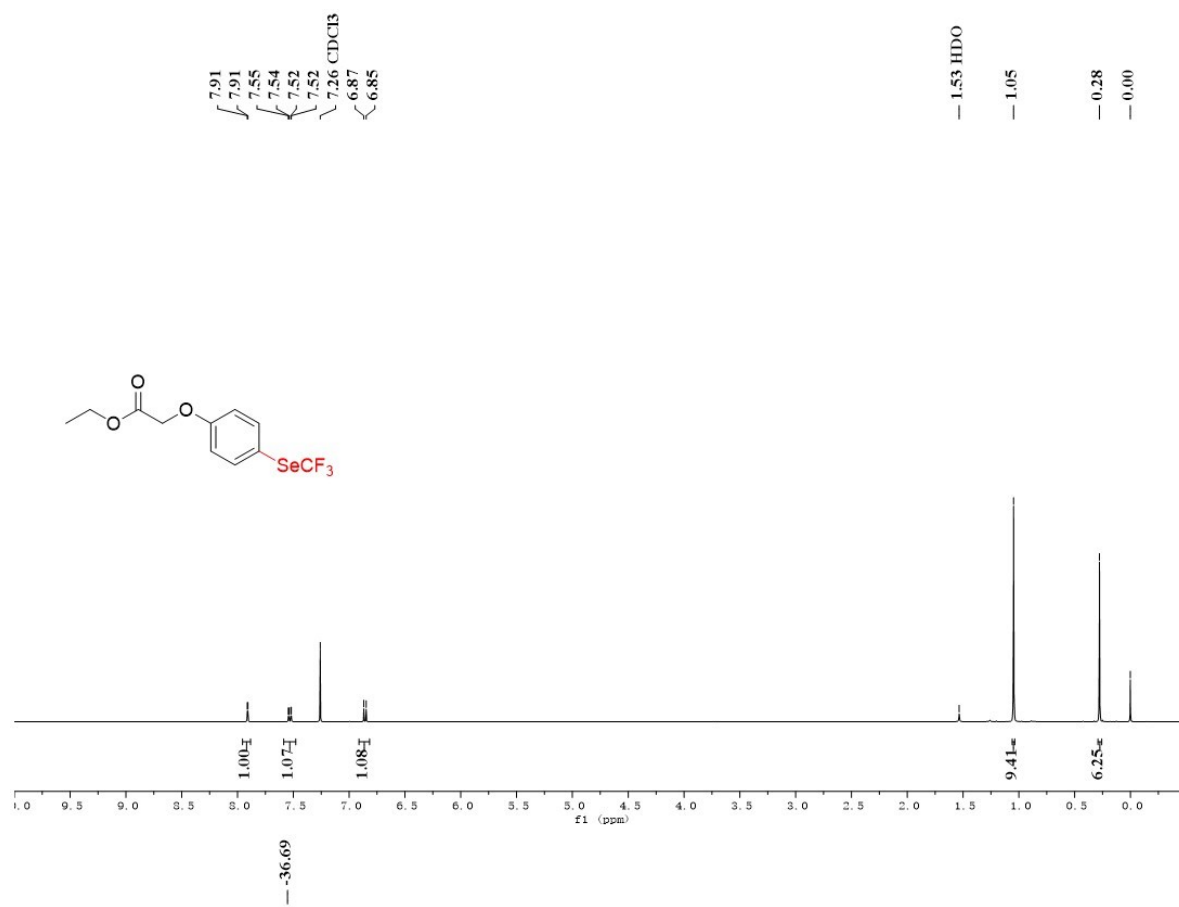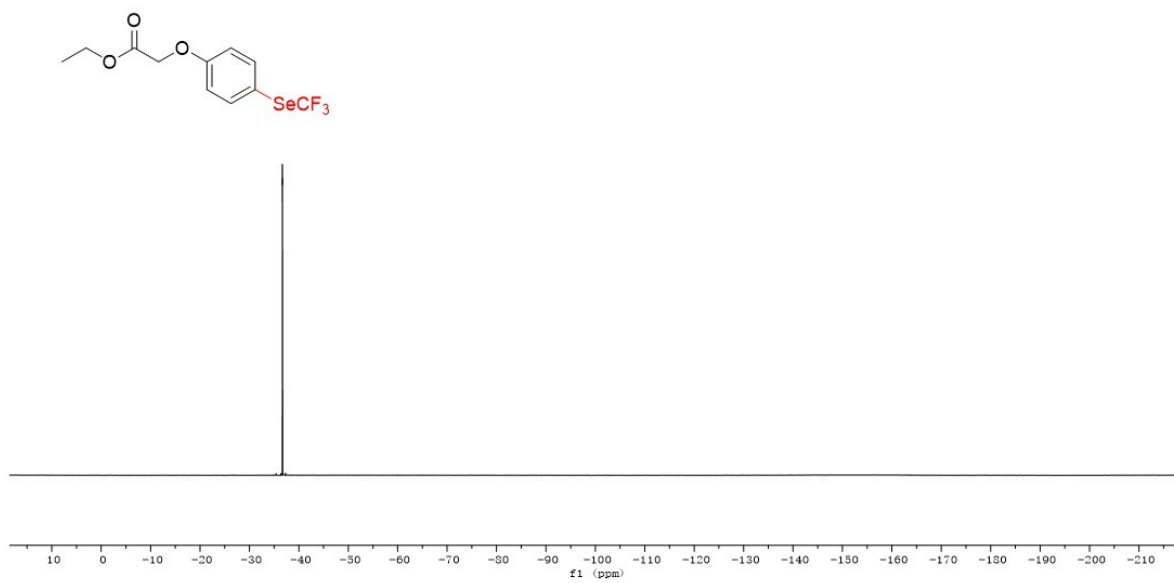

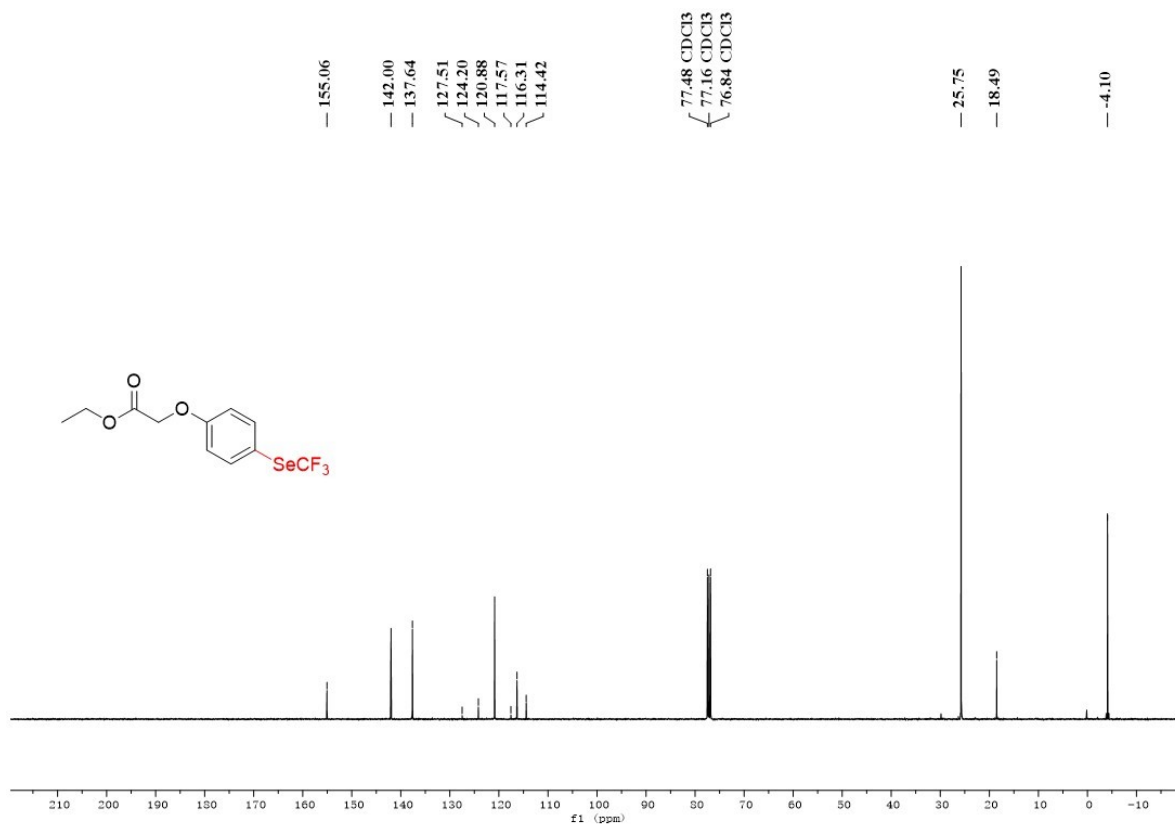

**5al** (5-chloro-2-(2,4-dichlorophenoxy)-4-((trifluoromethyl)selenyl)phenol)

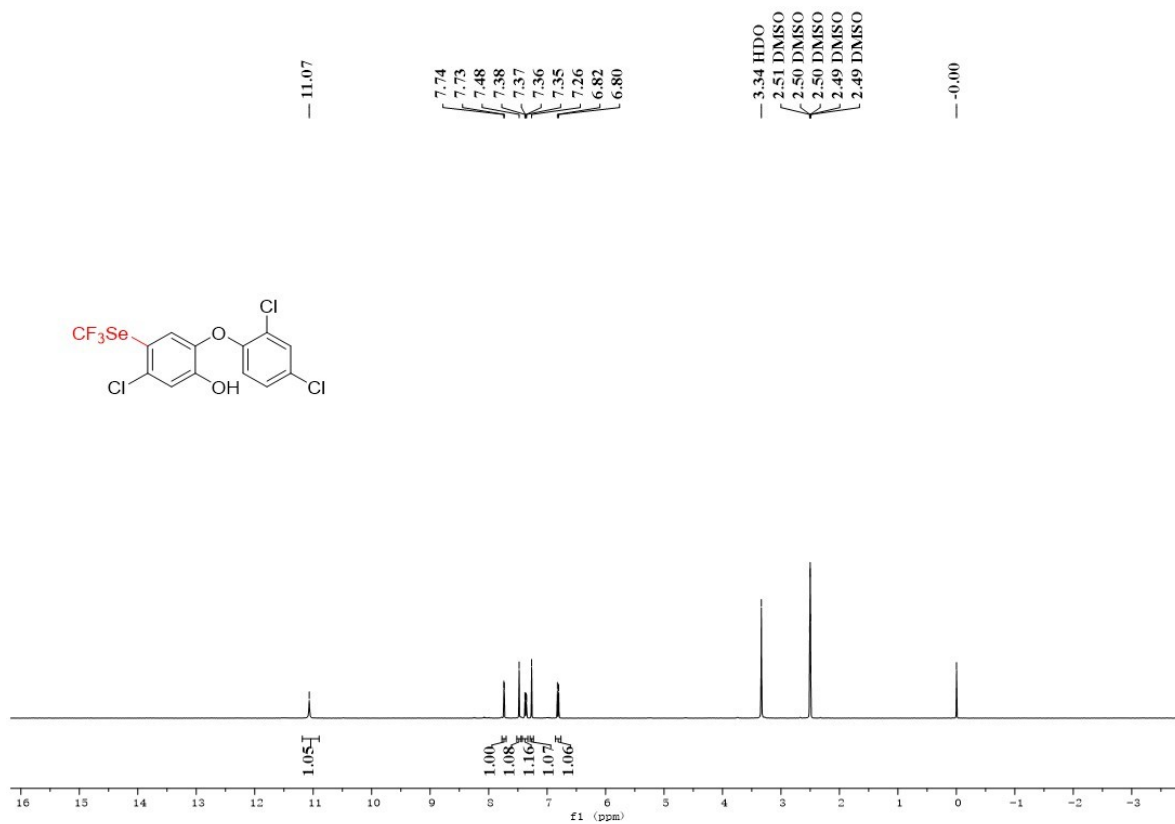

— -36.41

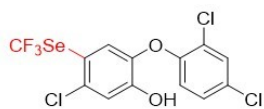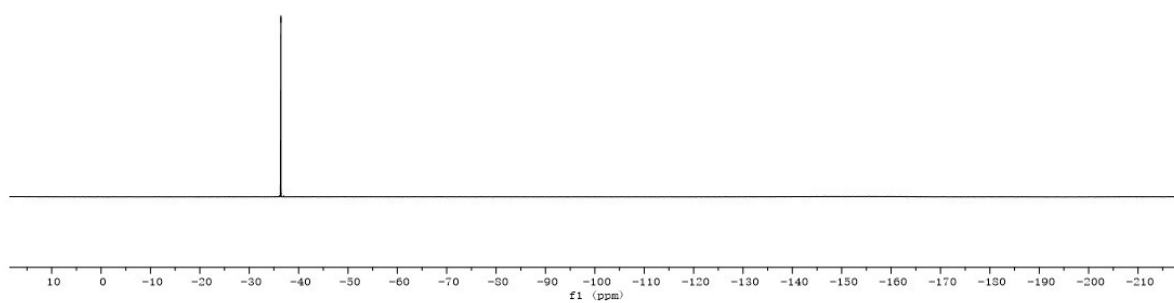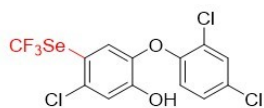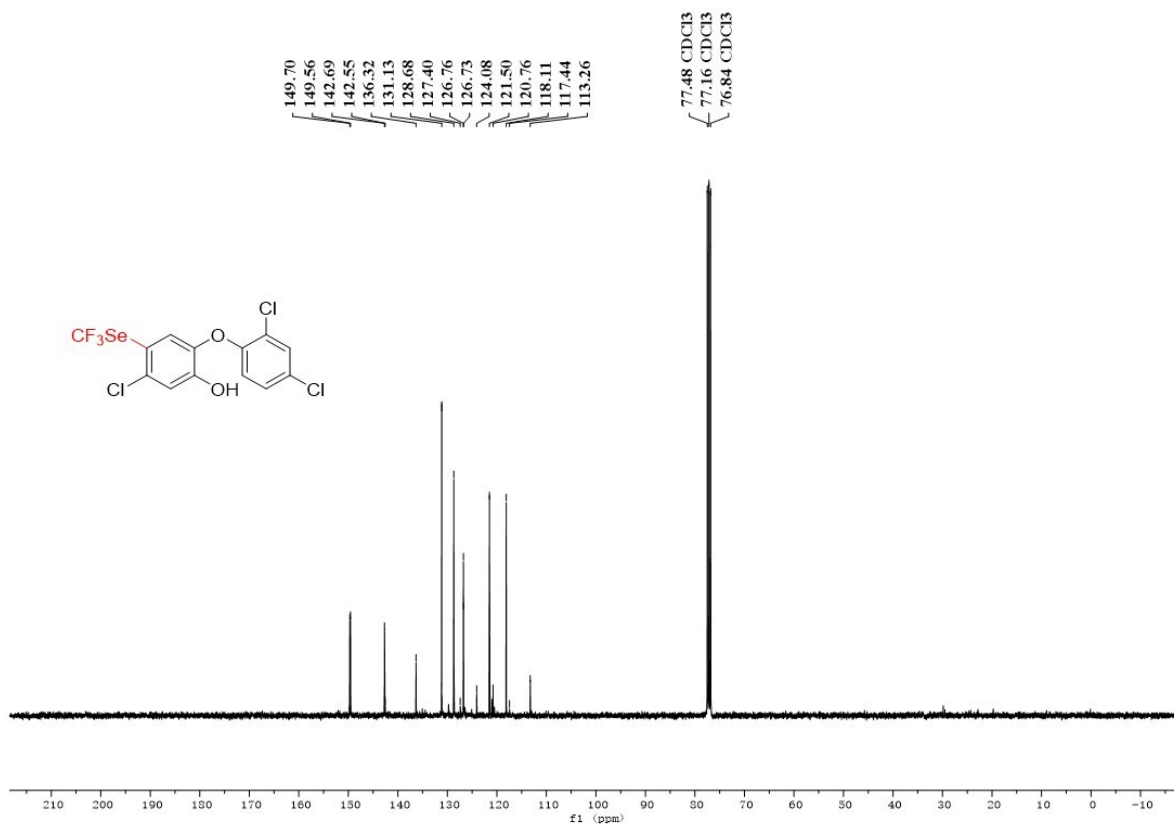

**5am** (1-(4-hydroxy-3-methyl-5-((trifluoromethyl)selenanyl)phenyl)ethan-1-one)

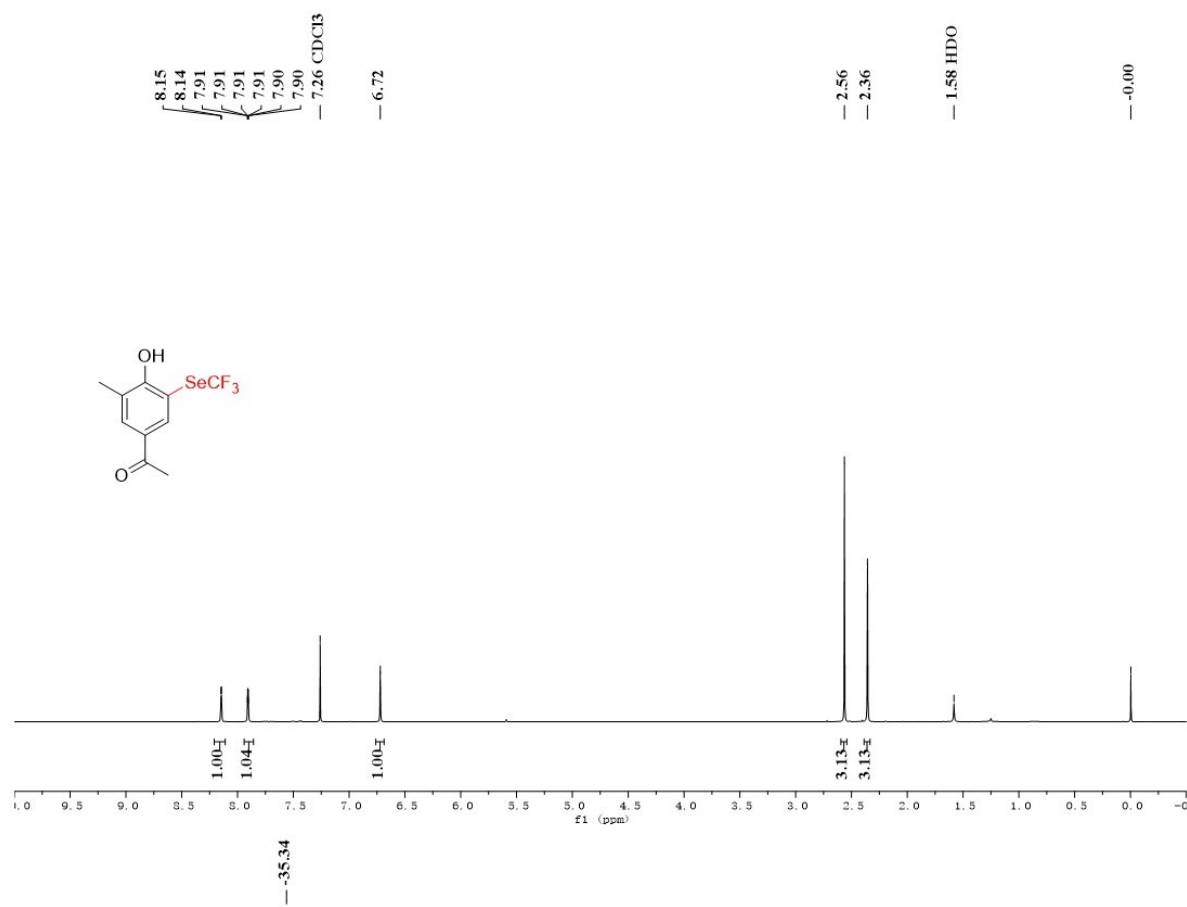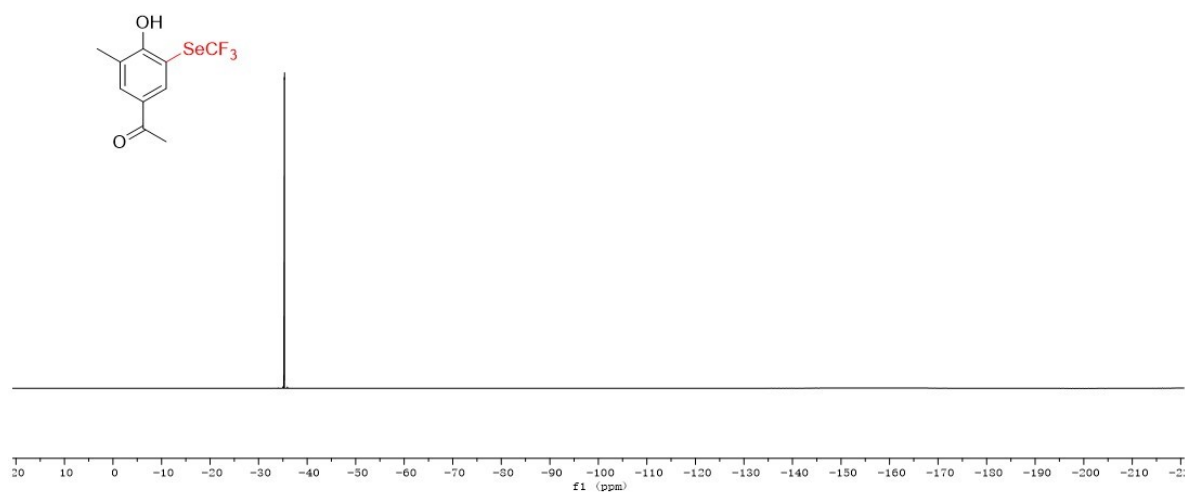

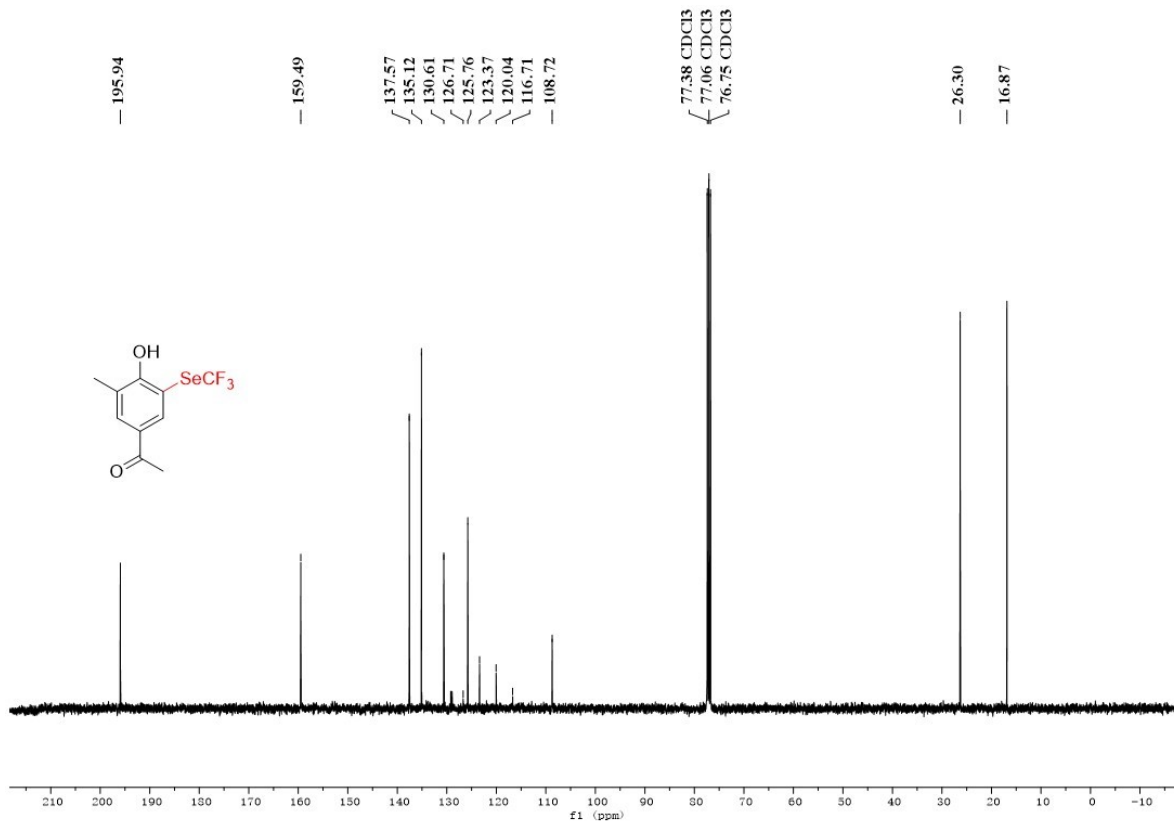

**5an** (1-((trifluoromethyl)selenyl)naphthalen-2-ol)

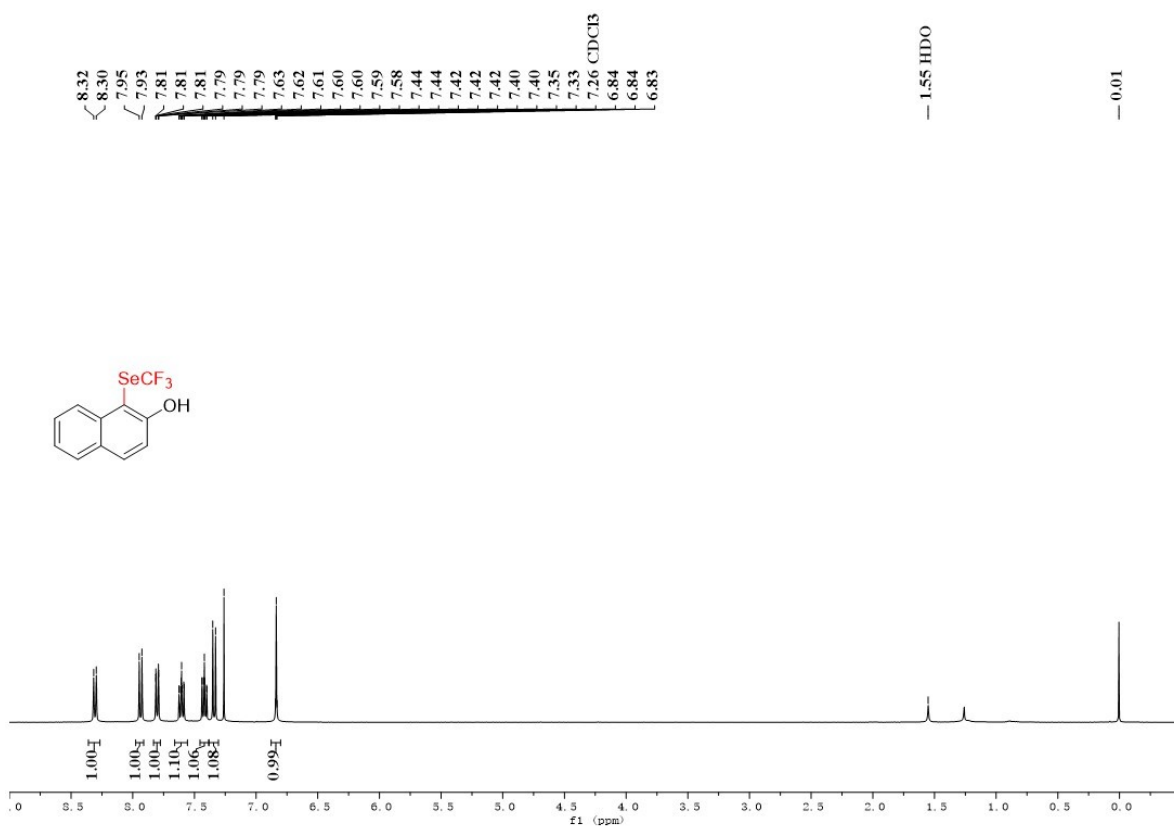

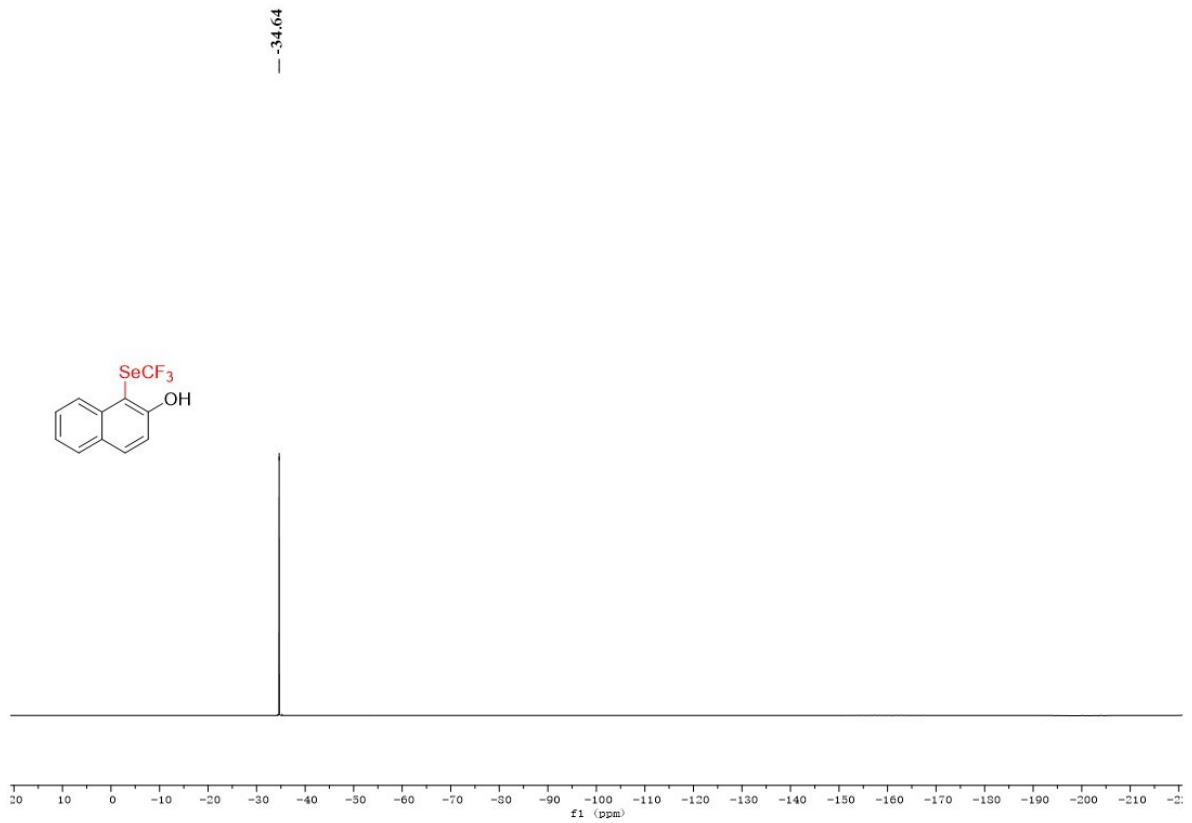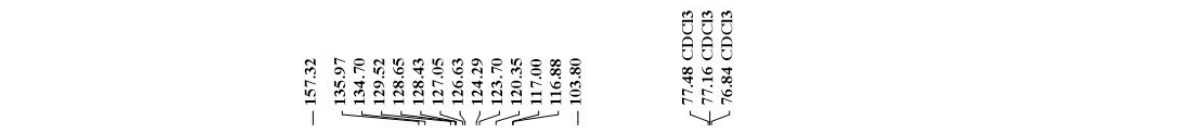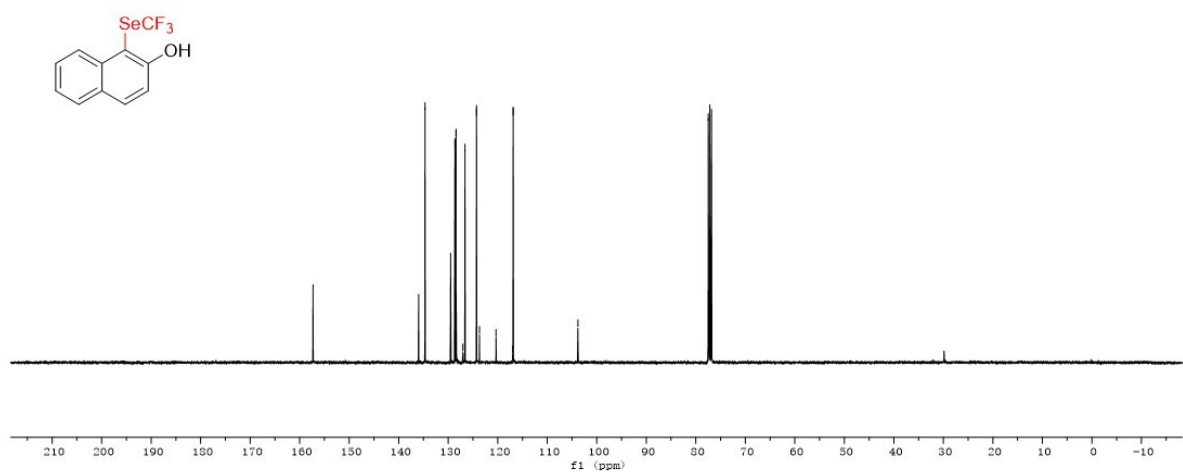

**5ao** (N-(4-hydroxy-3-((trifluoromethyl)selenanyl)phenyl)acetamide)

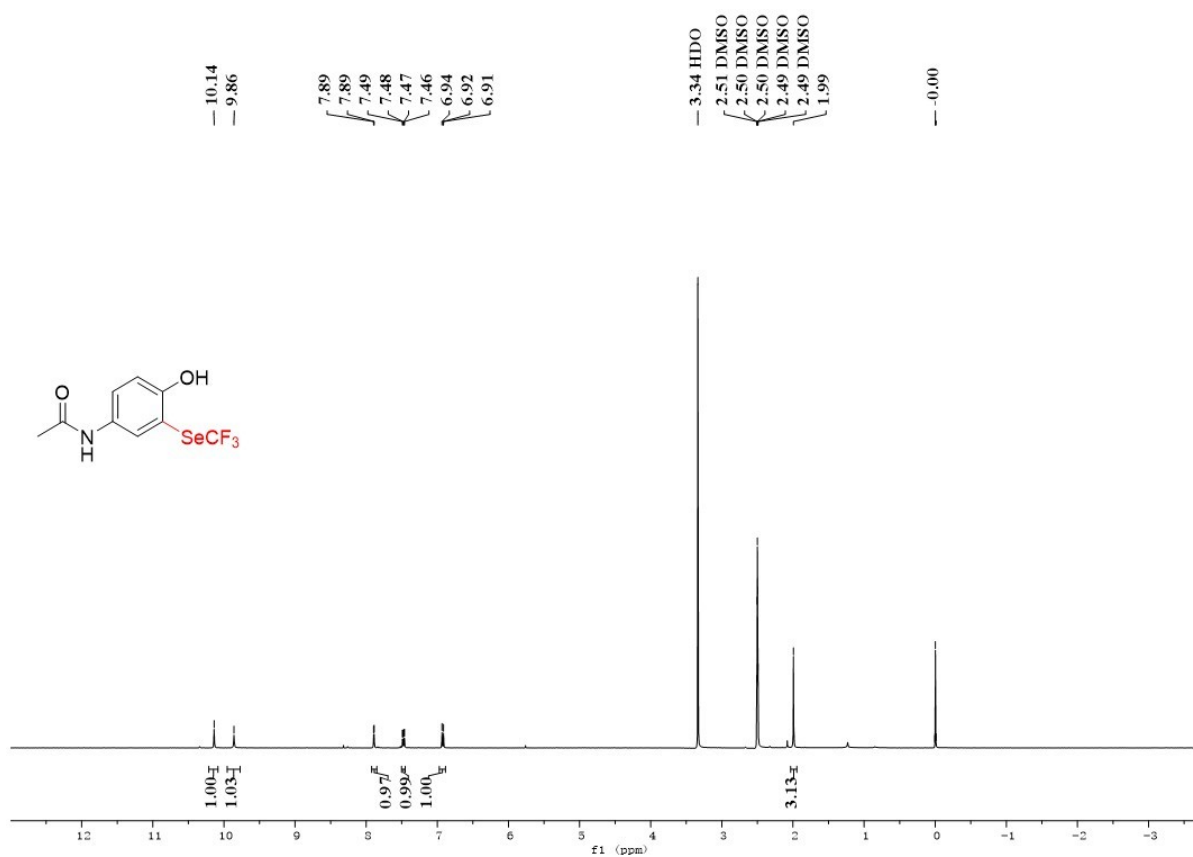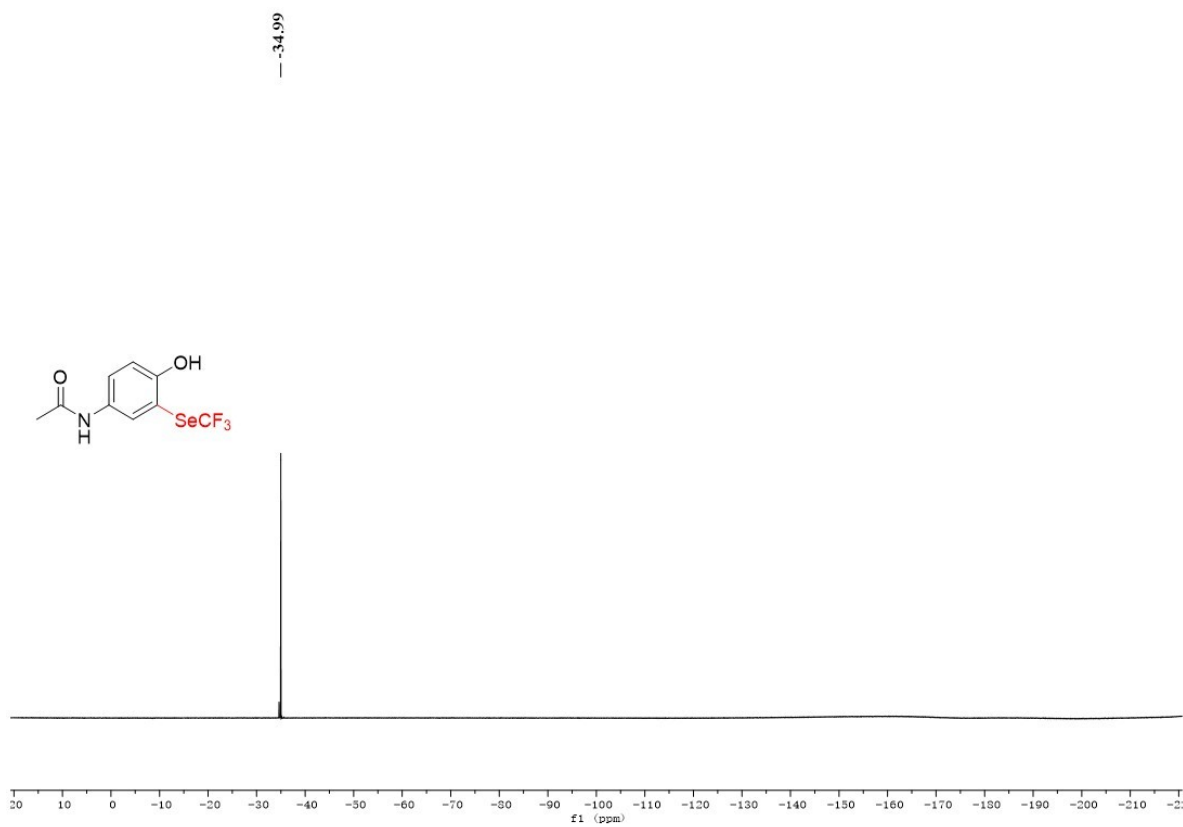



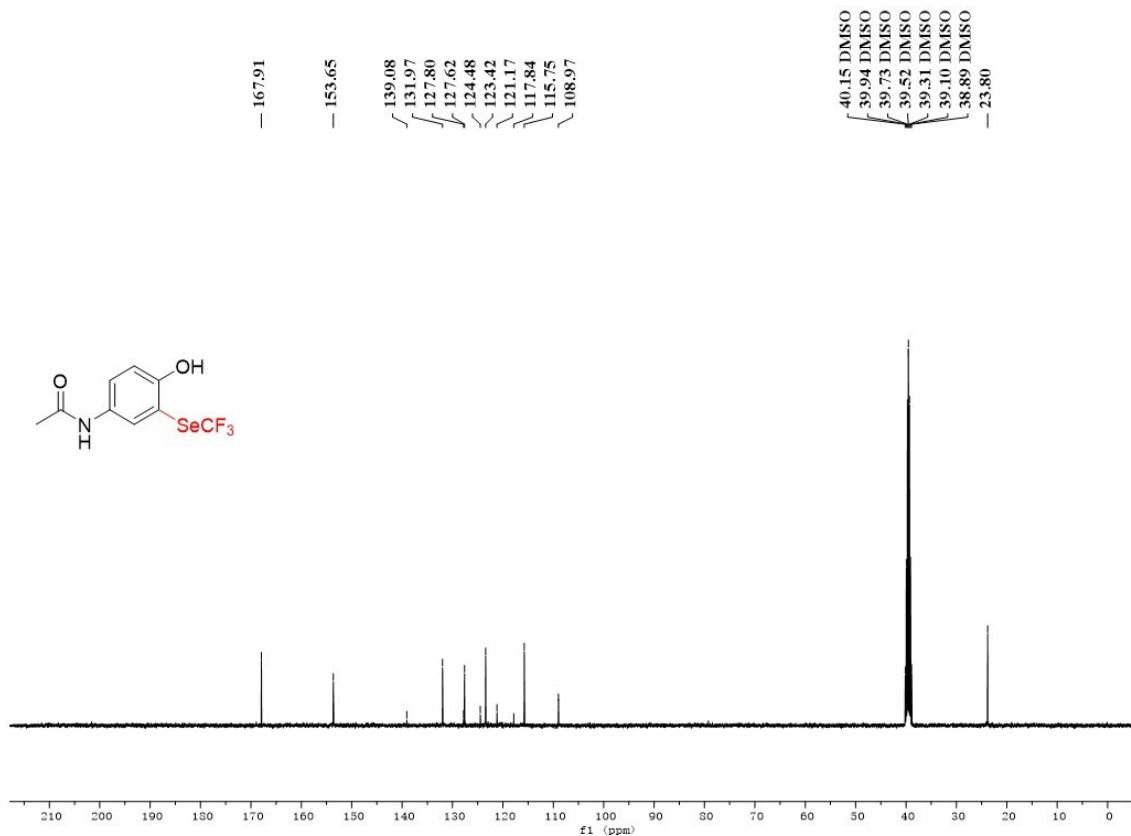

**5ap** (5'-((trifluoromethyl)selanyl)-[1,1':3',1''-terphenyl]-2'-ol)

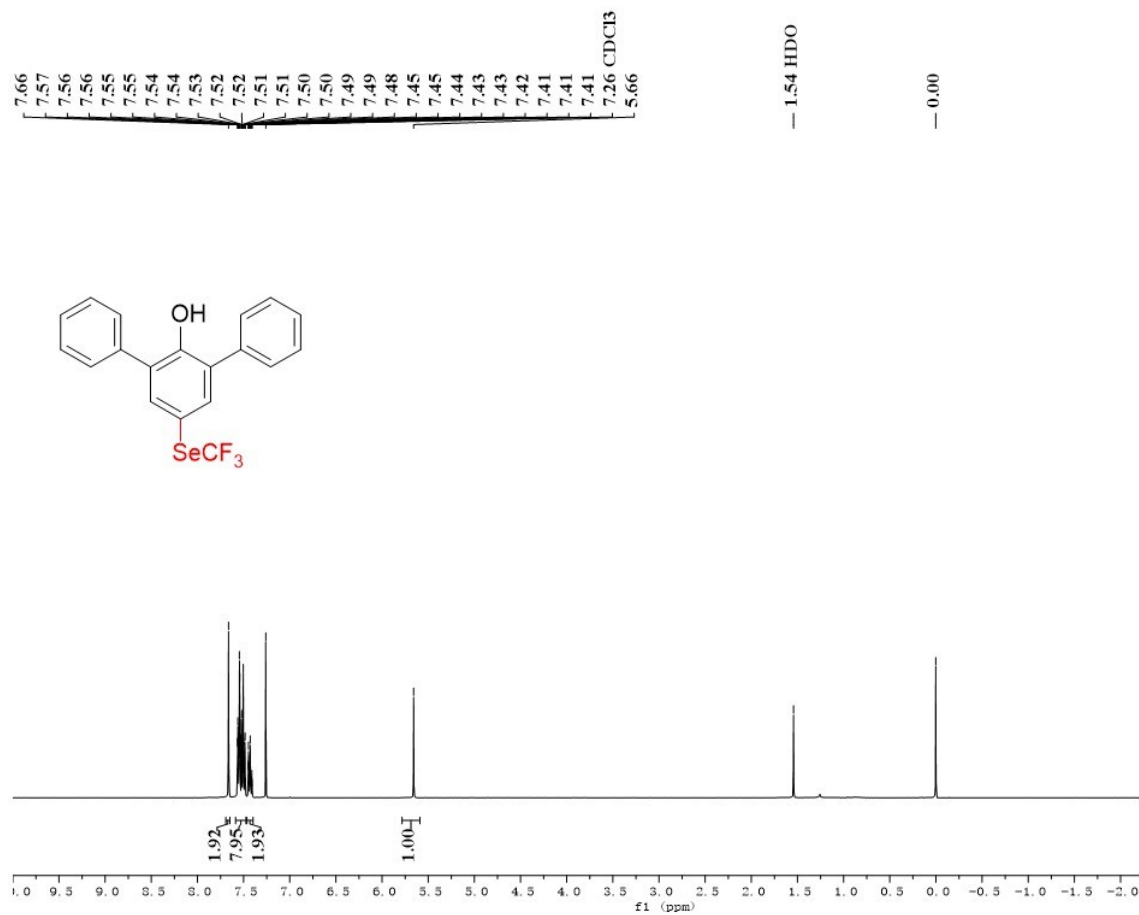

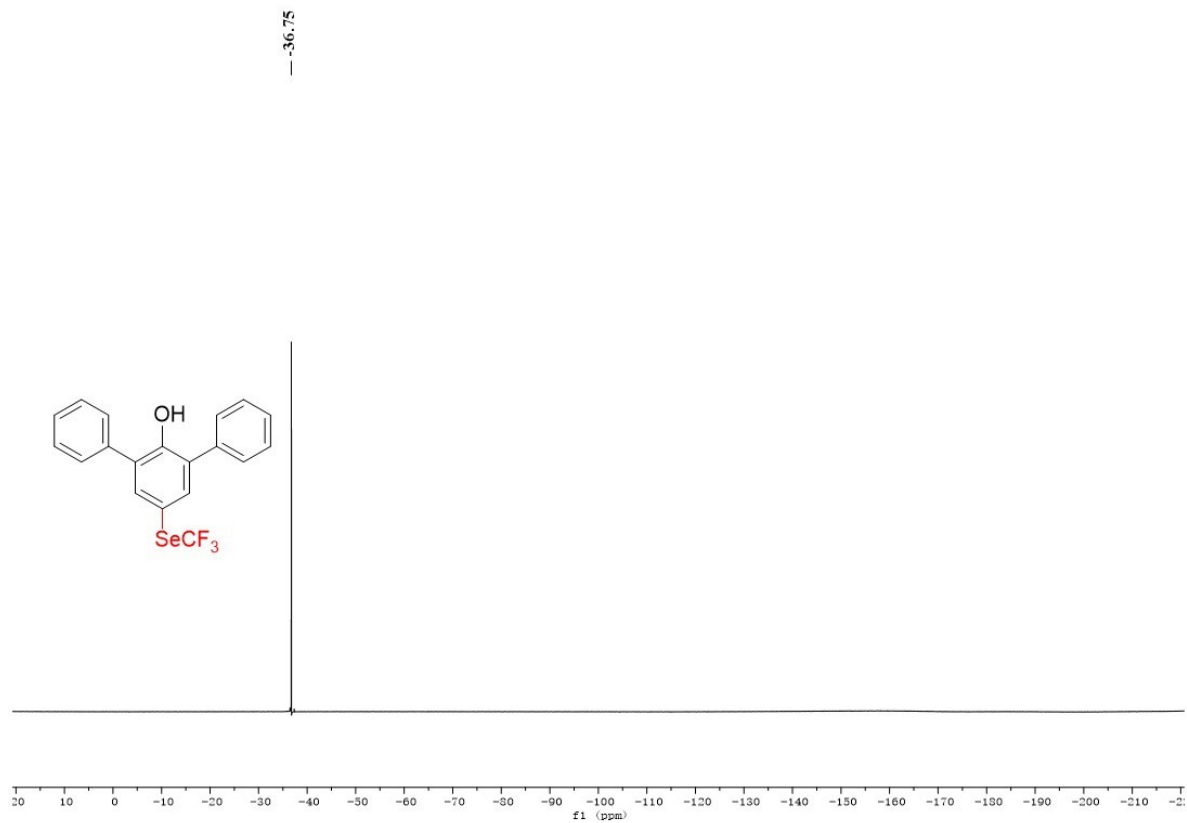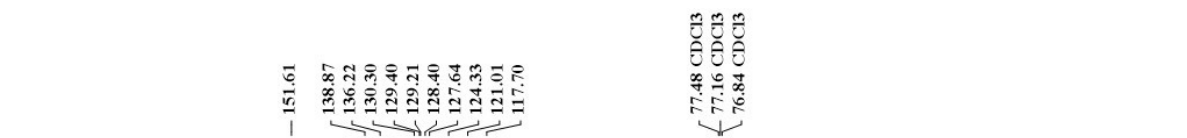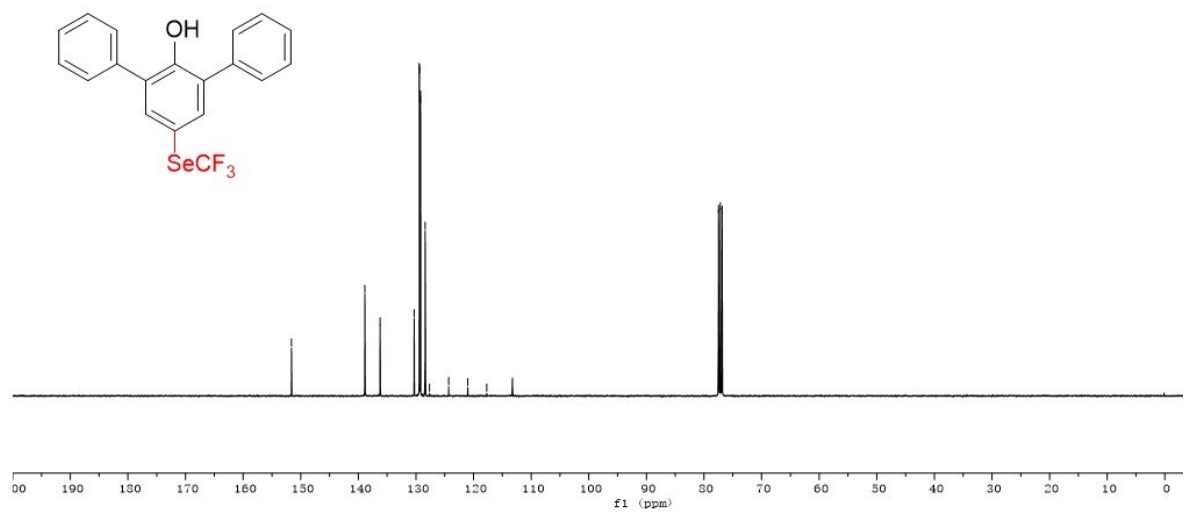

**5aq** (4-fluoro-2-methyl-6-((trifluoromethyl)selenanyl)phenol)

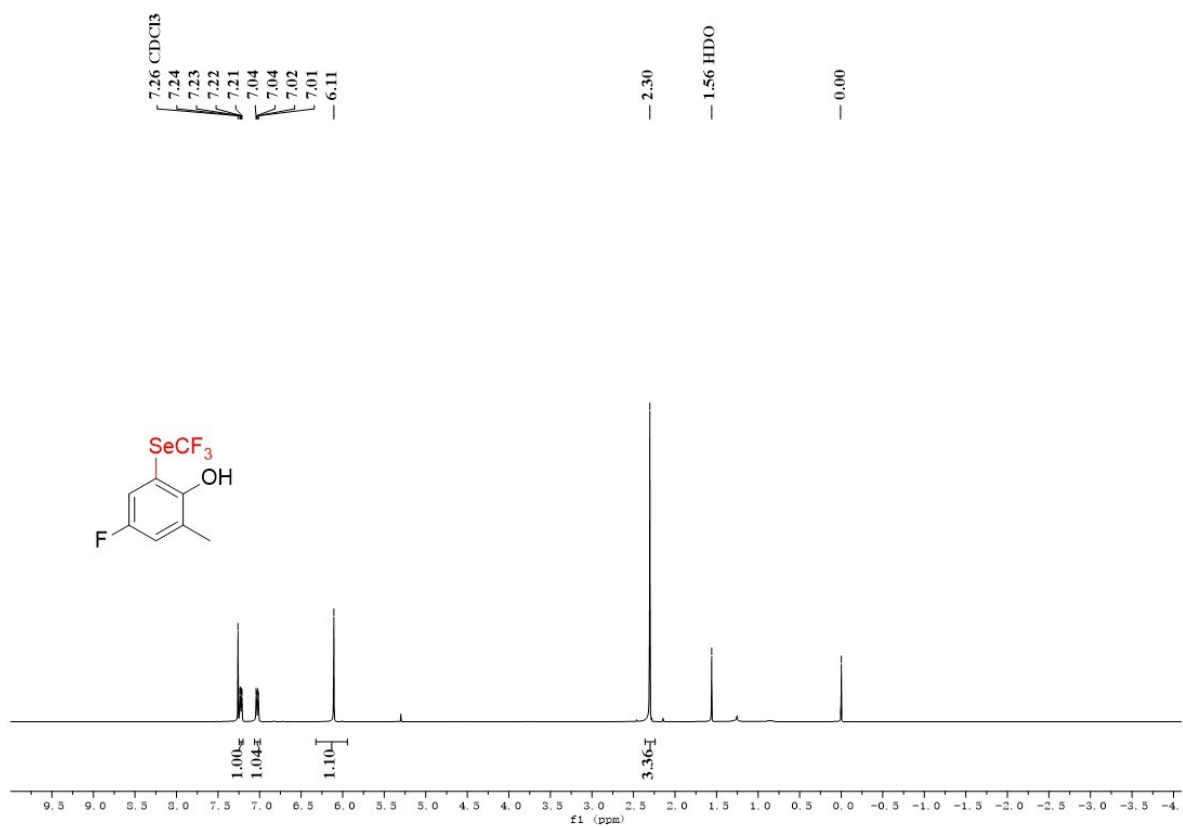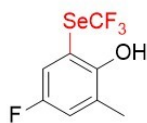

-35.43

-123.21

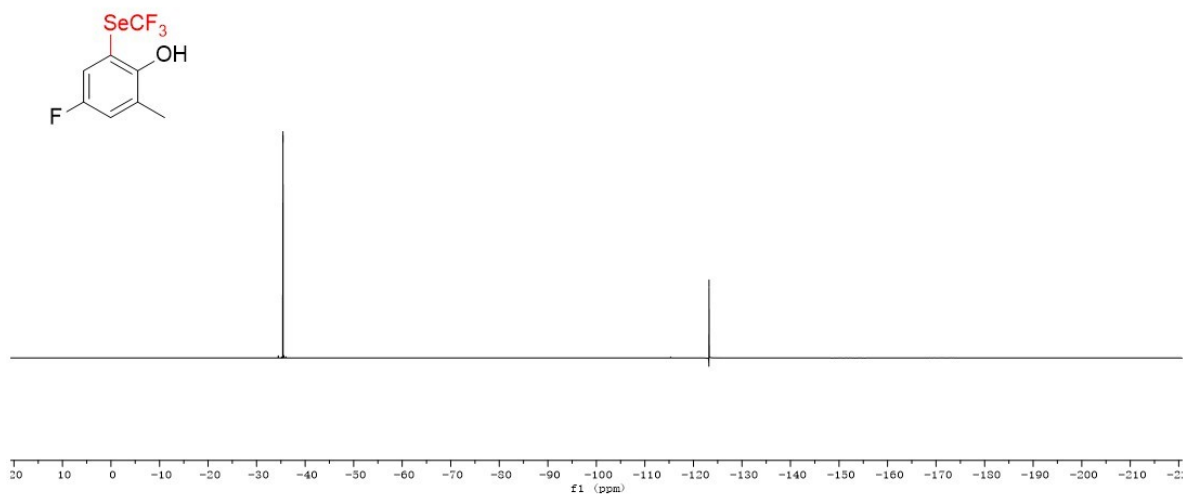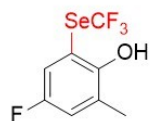

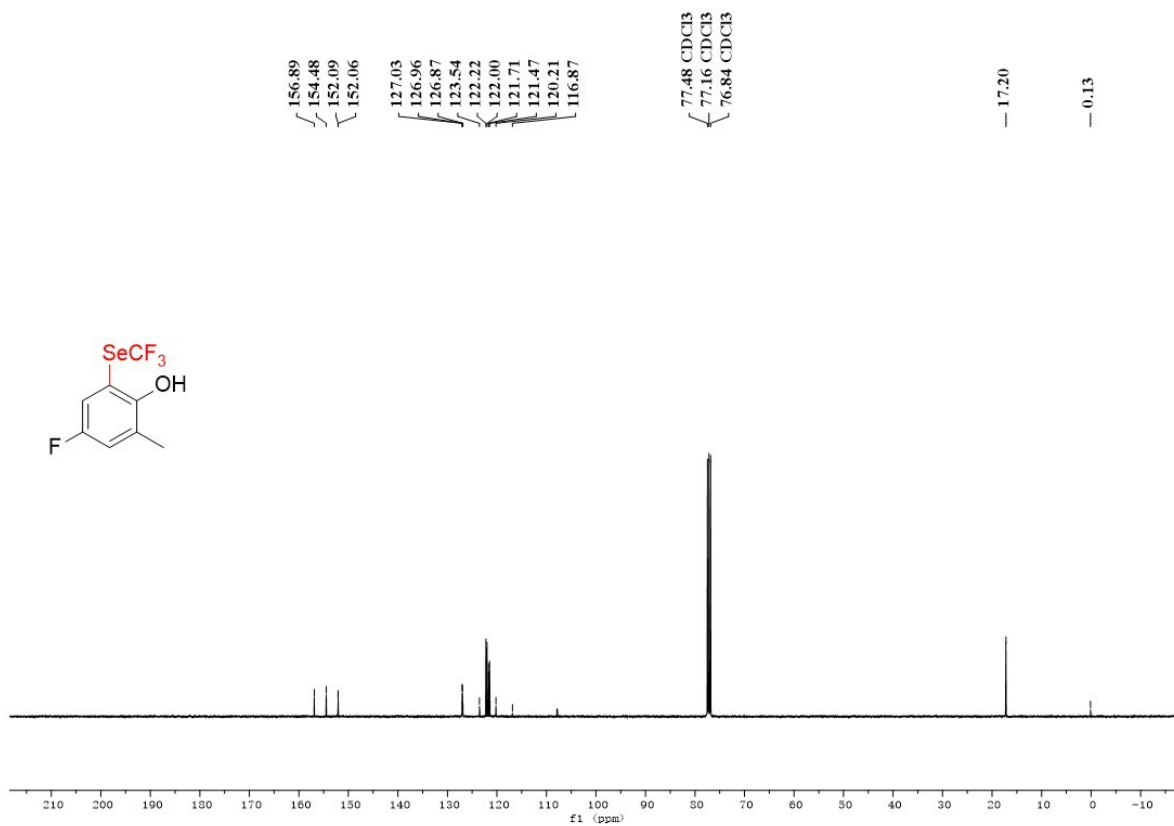

**5ar** (methyl 2,4-dihydroxy-5-((trifluoromethyl)selanyl)benzoate)

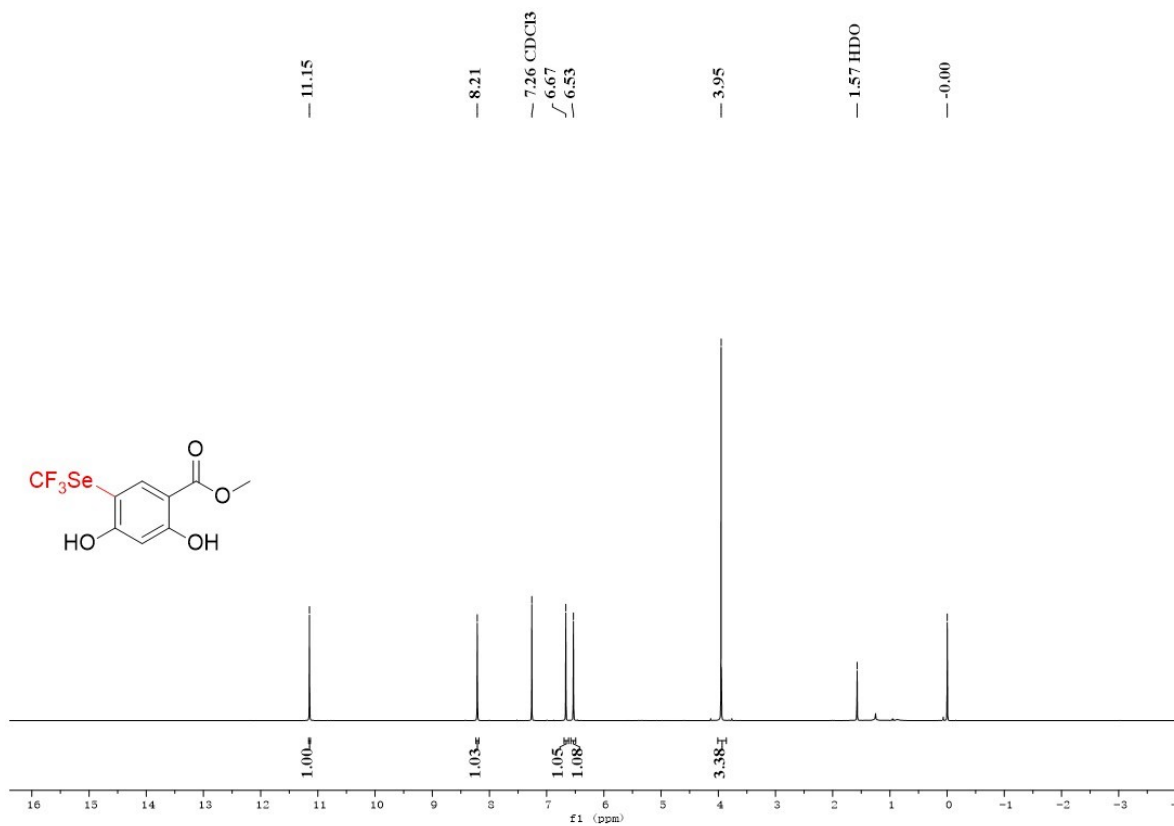

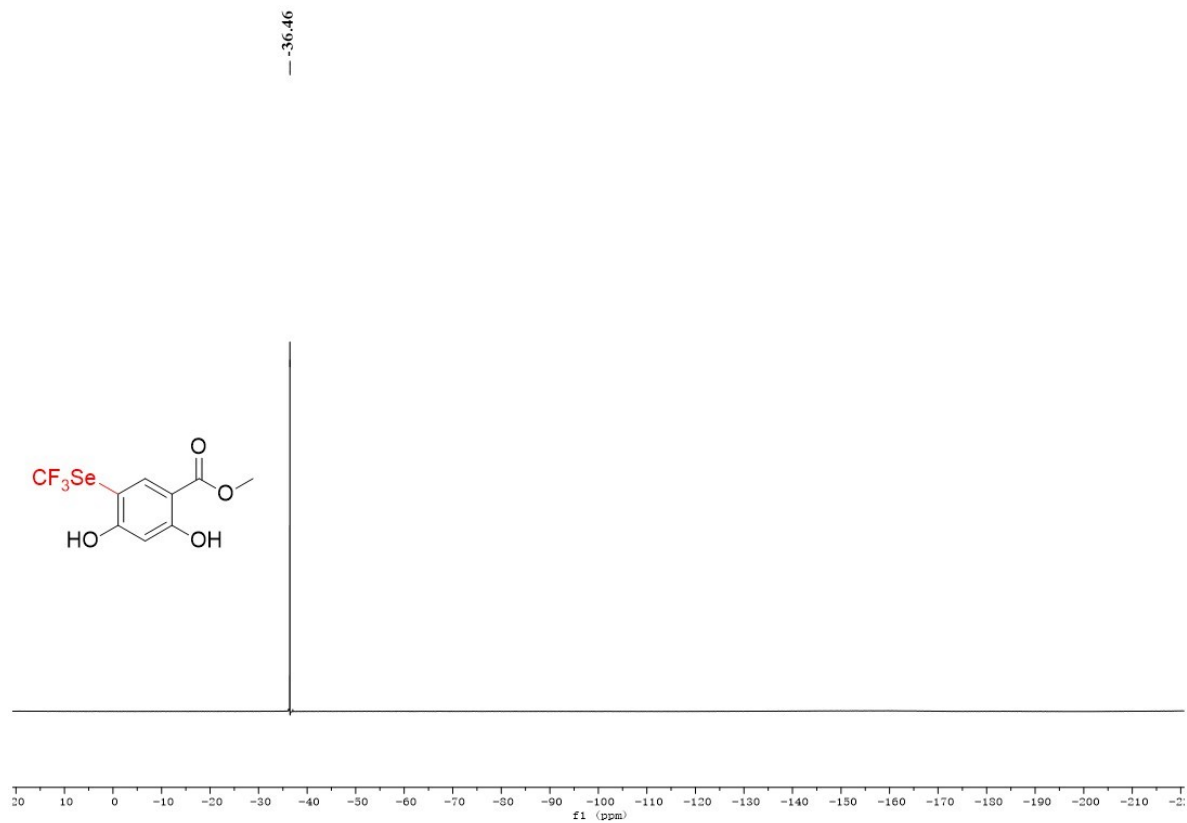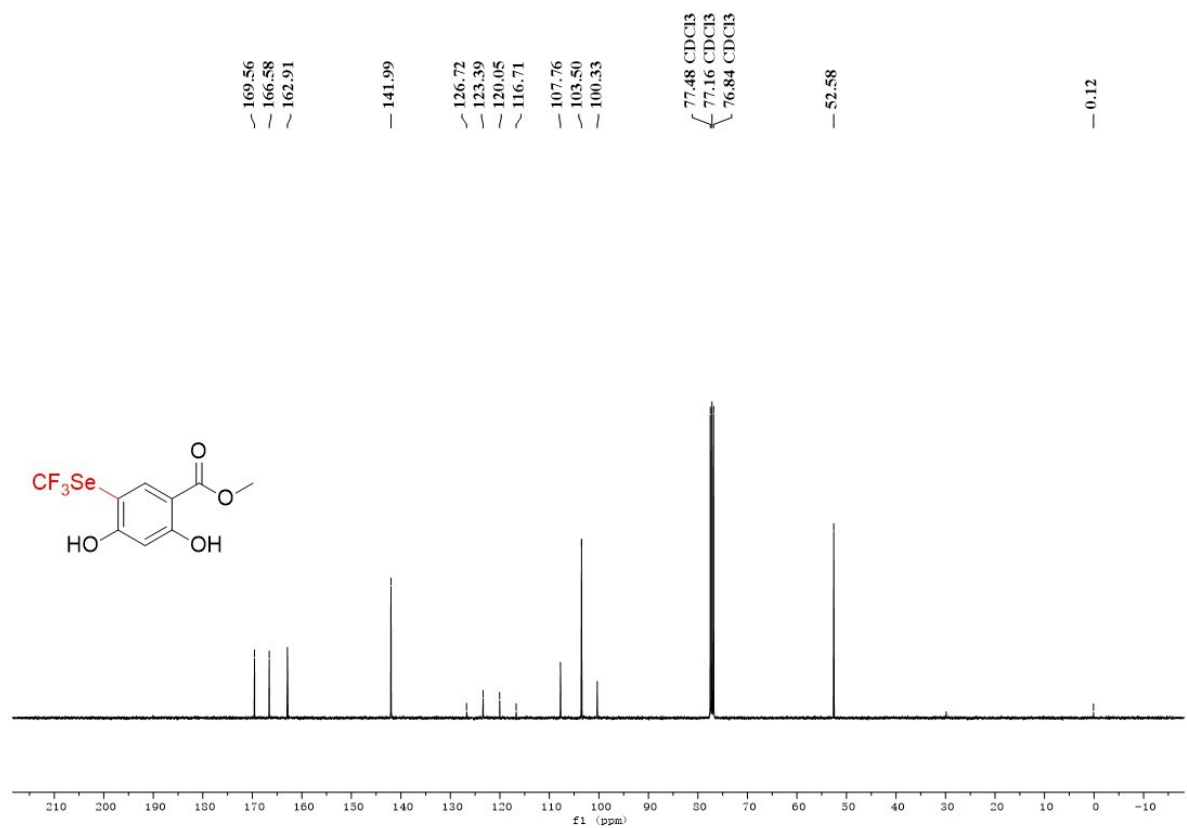

5as (2-((trifluoromethyl)selanyl)benzene-1,4-diol)

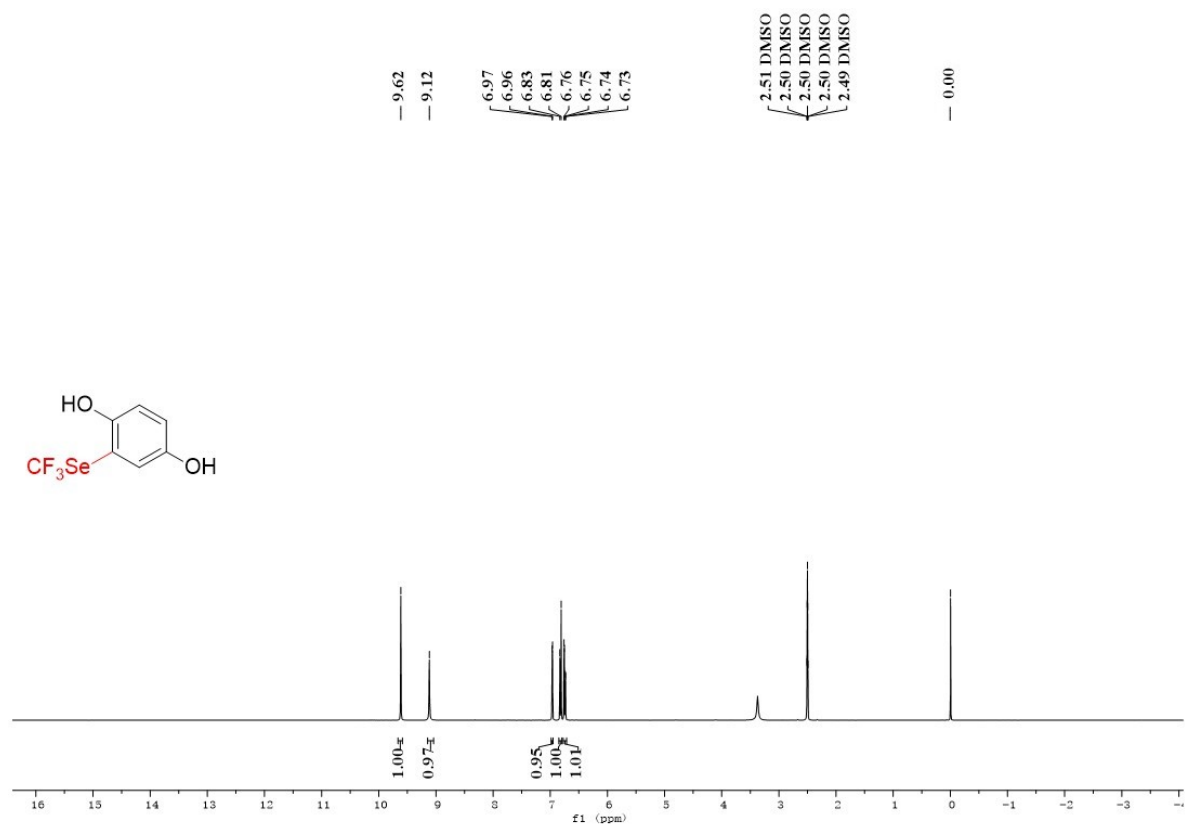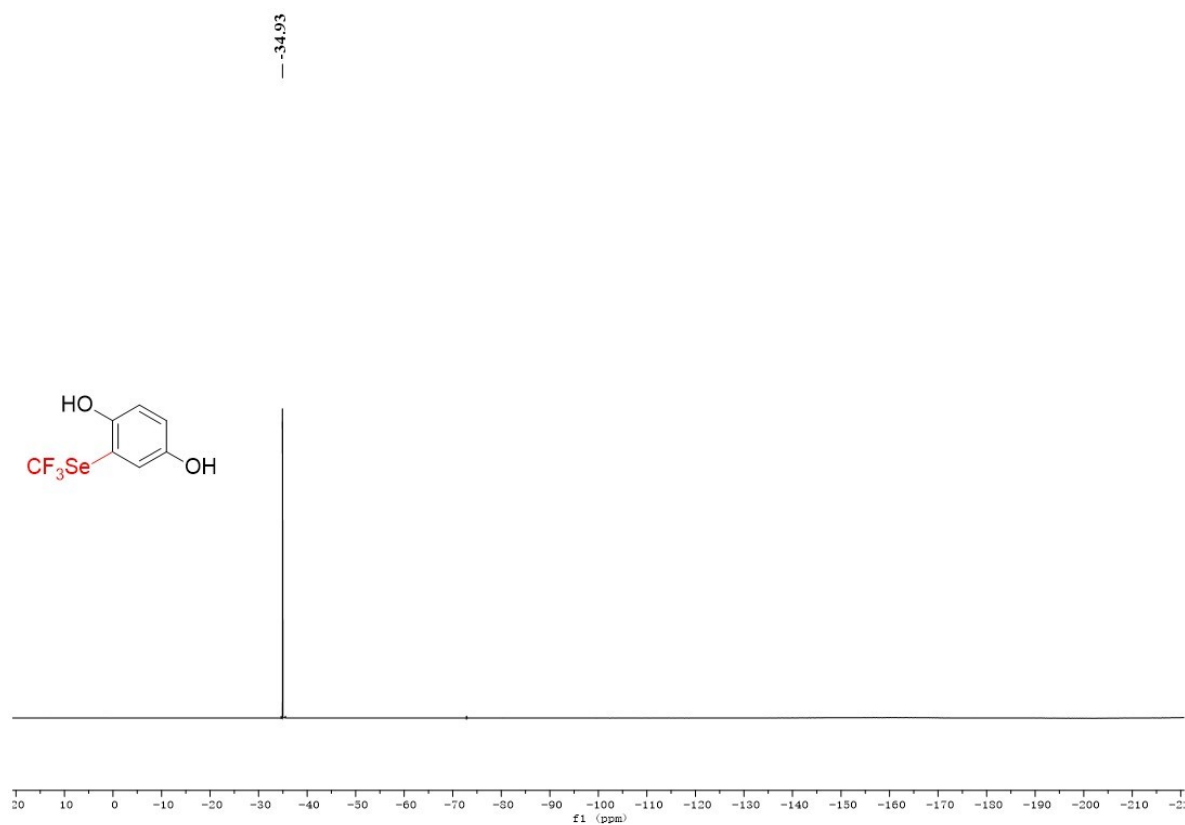

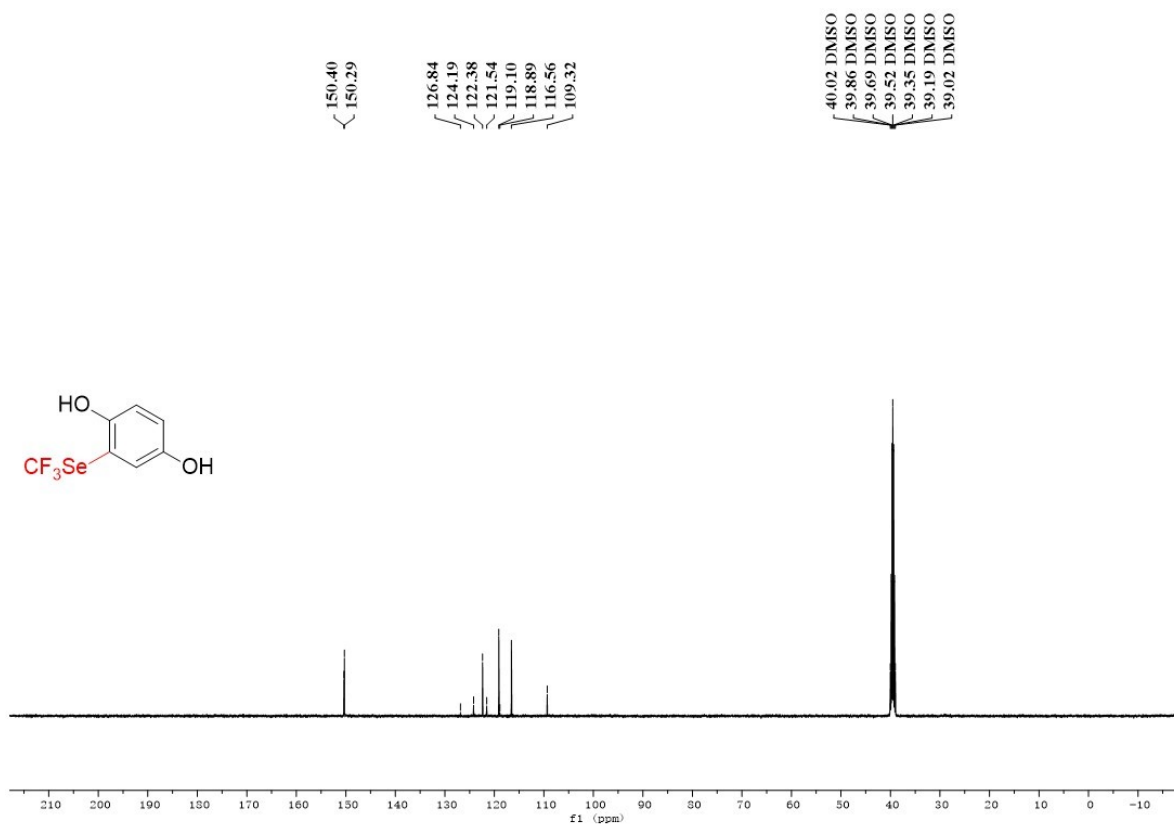

**5at** (2,6-diisopropyl-4-((trifluoromethyl)selenyl)aniline)

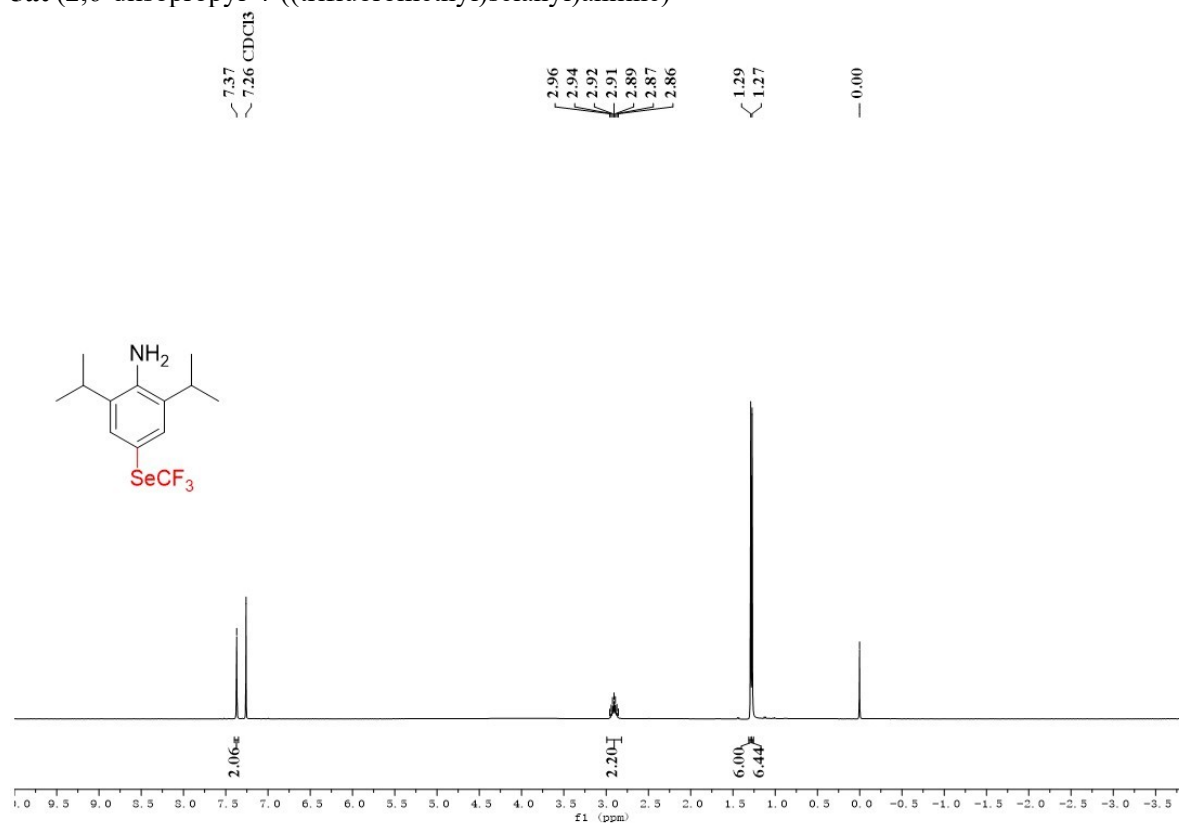

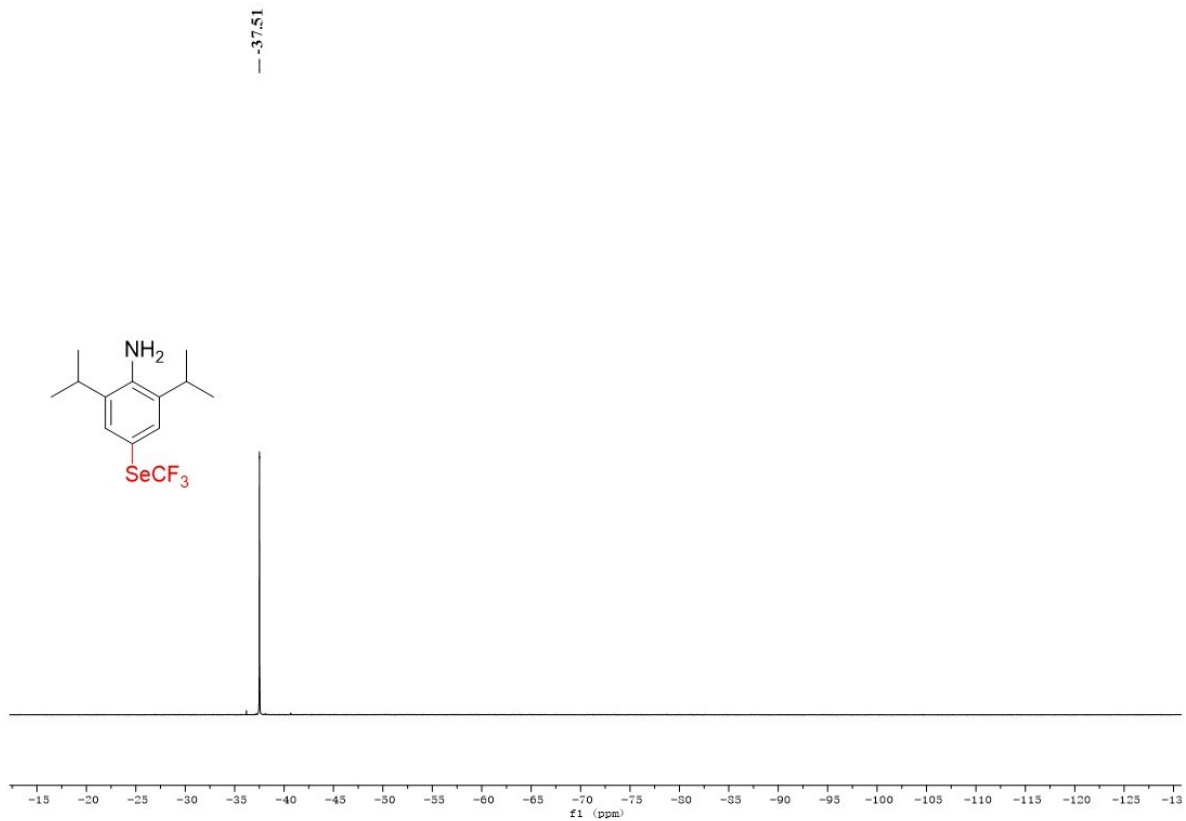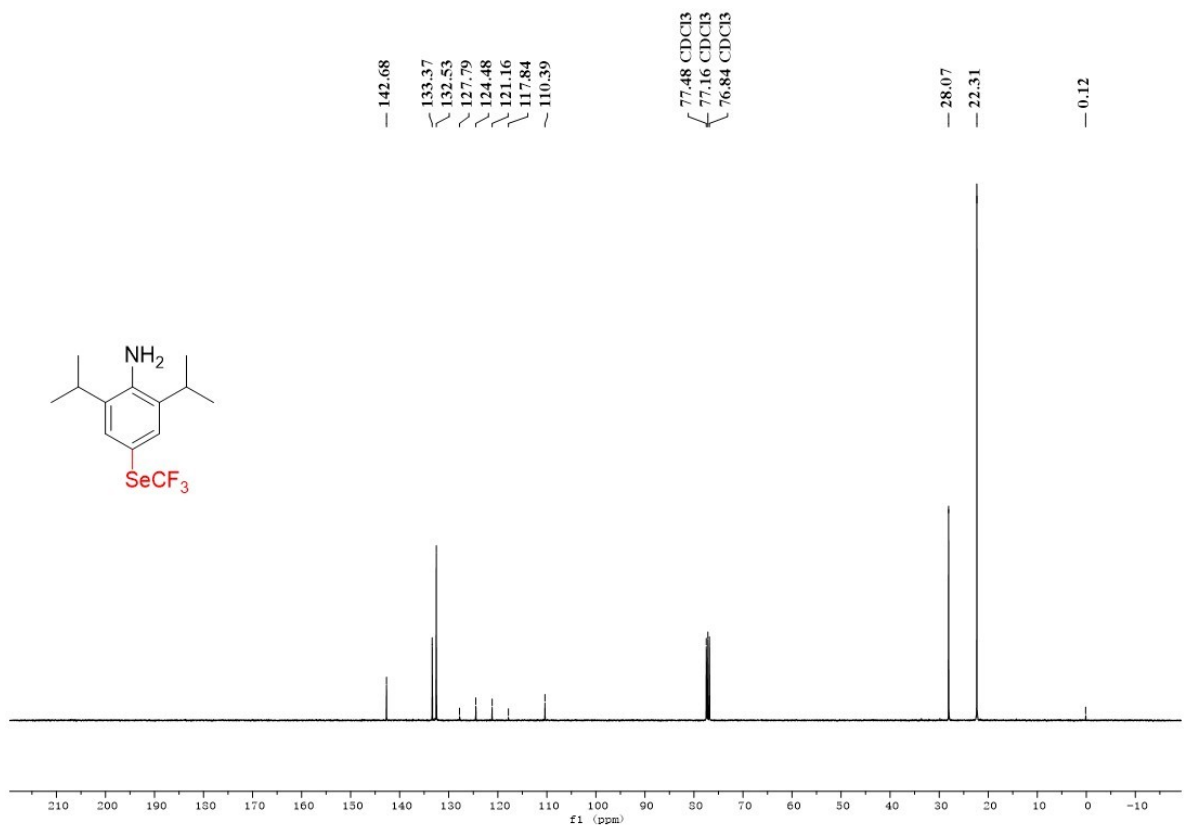



**5au** (2-chloro-6-methyl-4-((trifluoromethyl)selanyl)aniline)

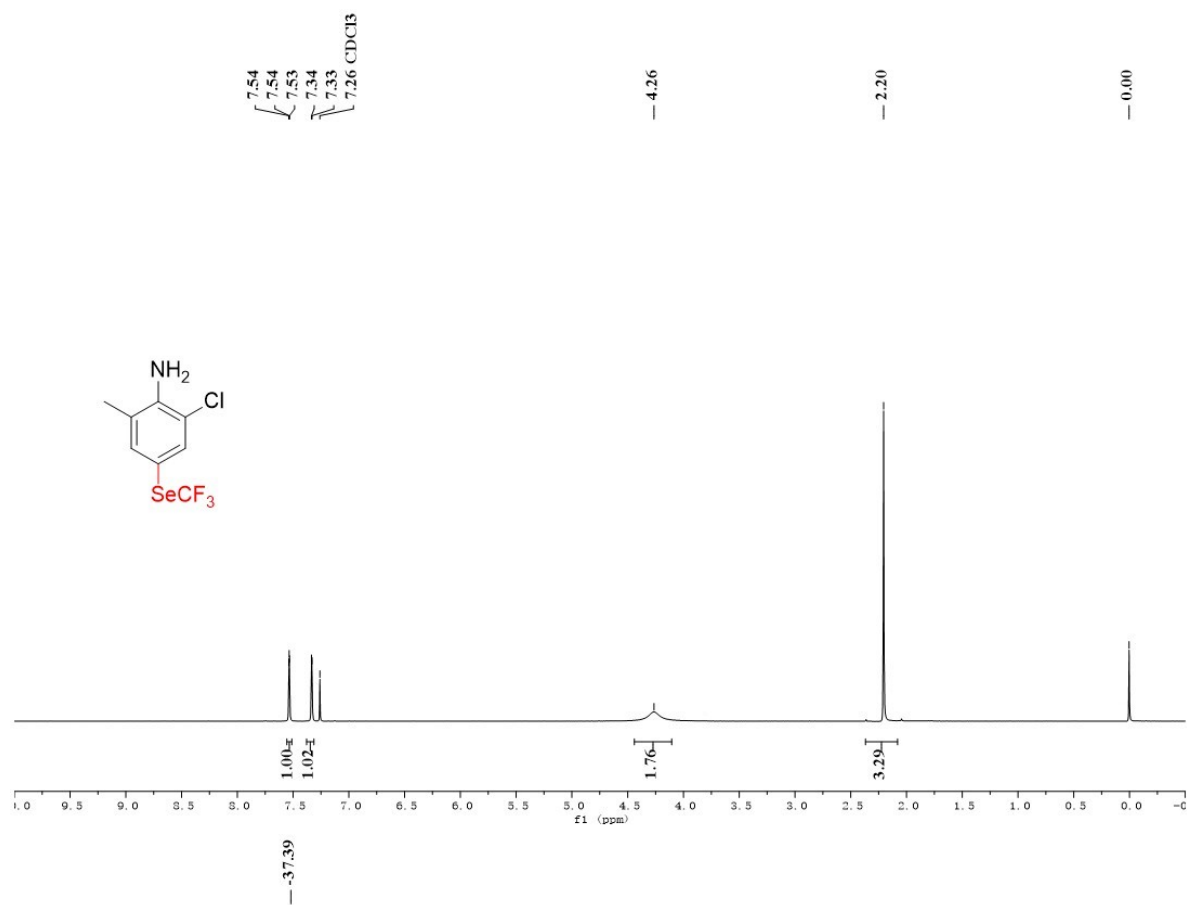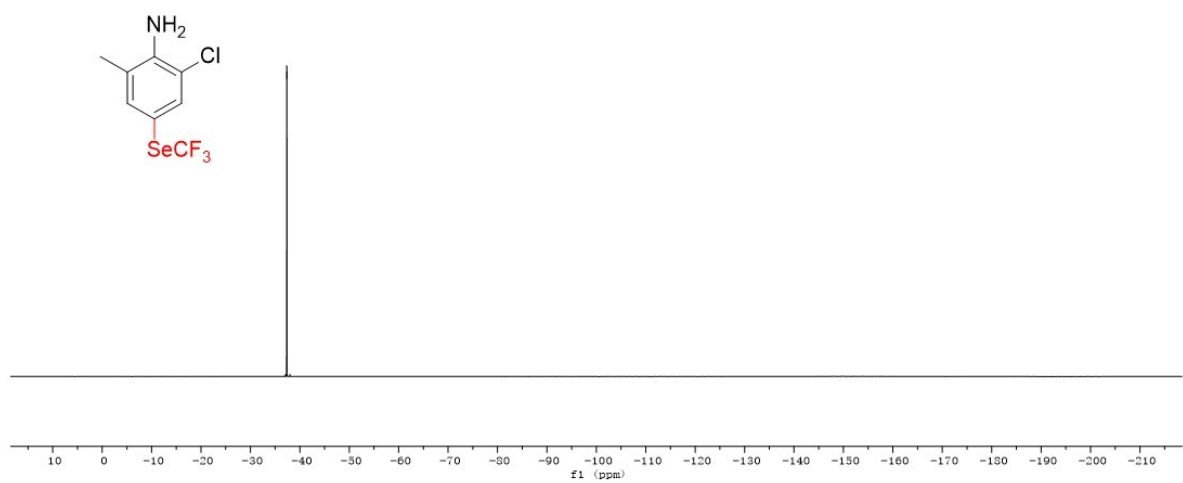

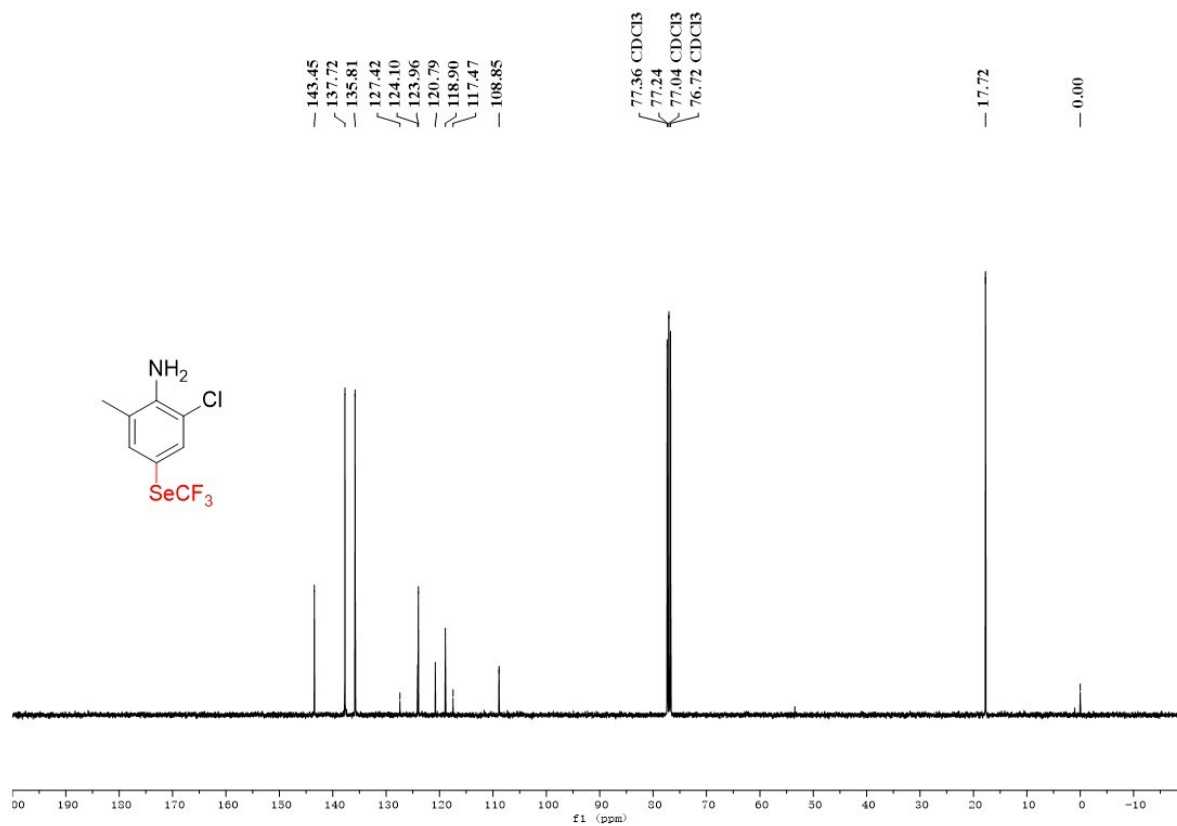

**5av** (N,N-dimethyl-4-((trifluoromethyl)selanyl)aniline)

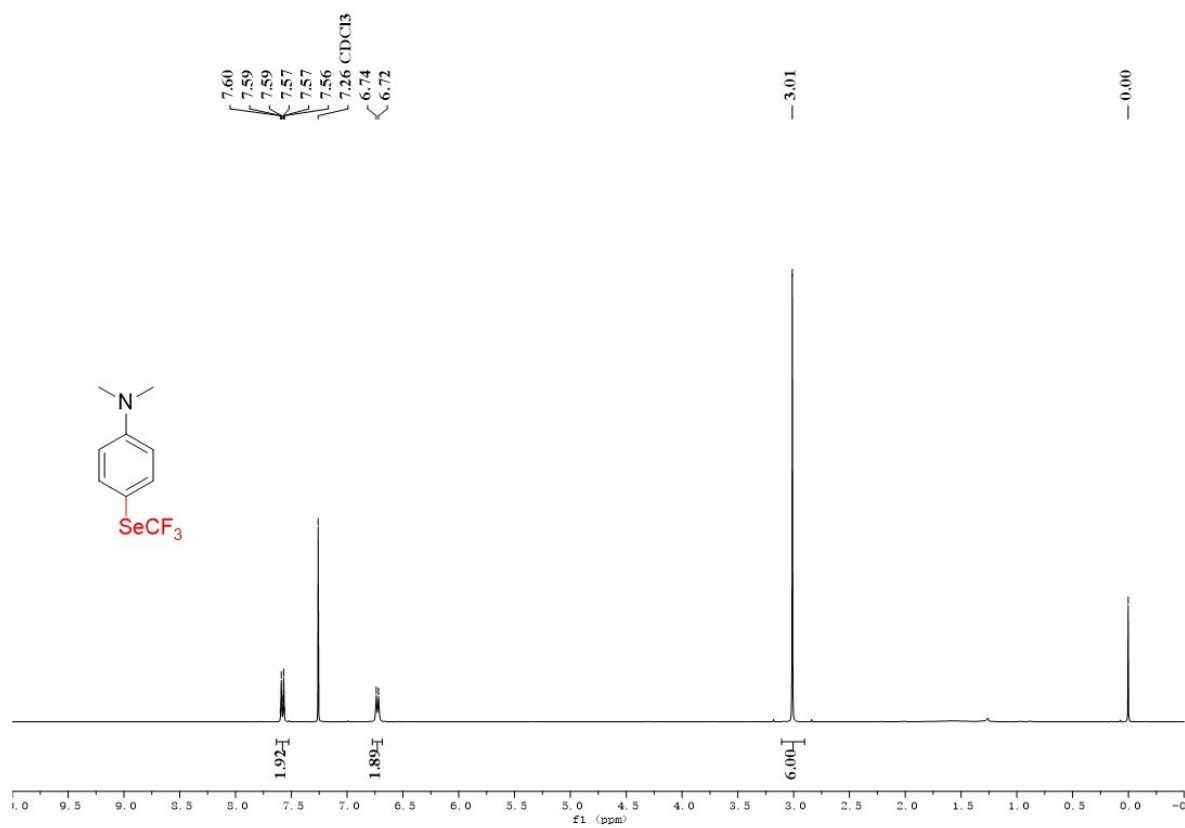

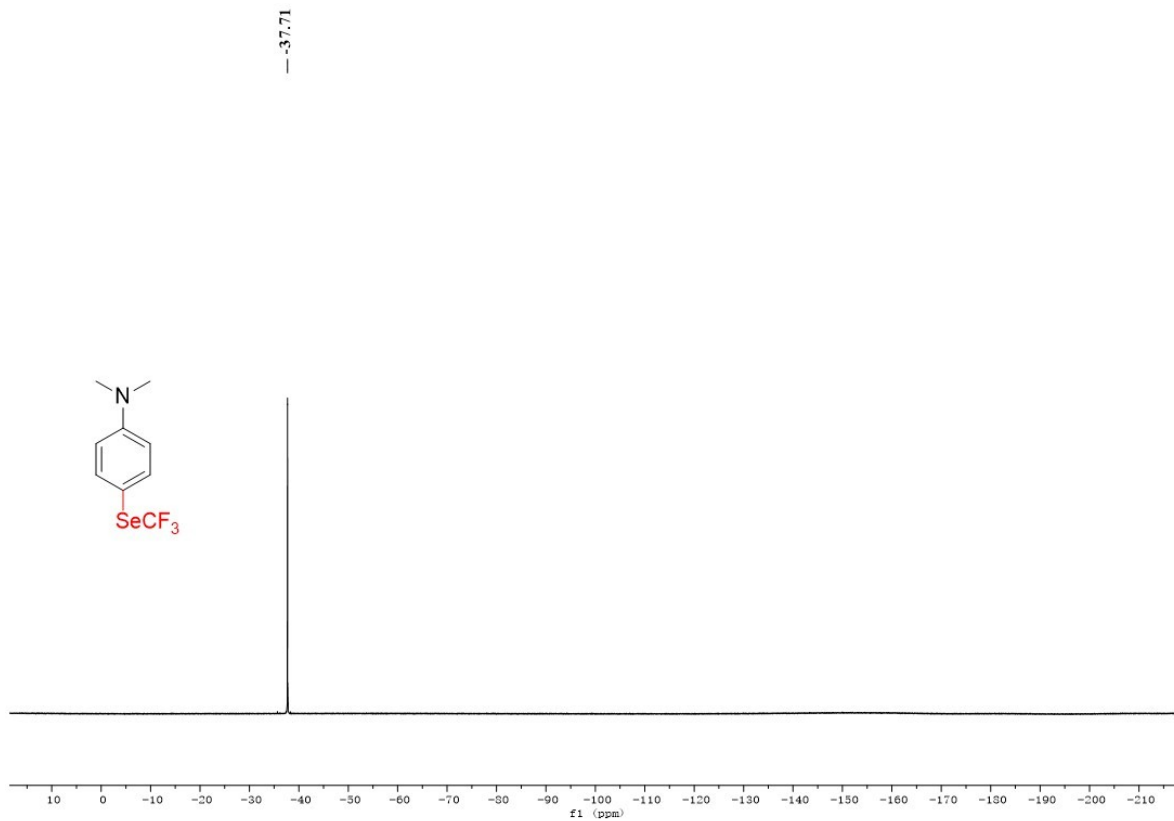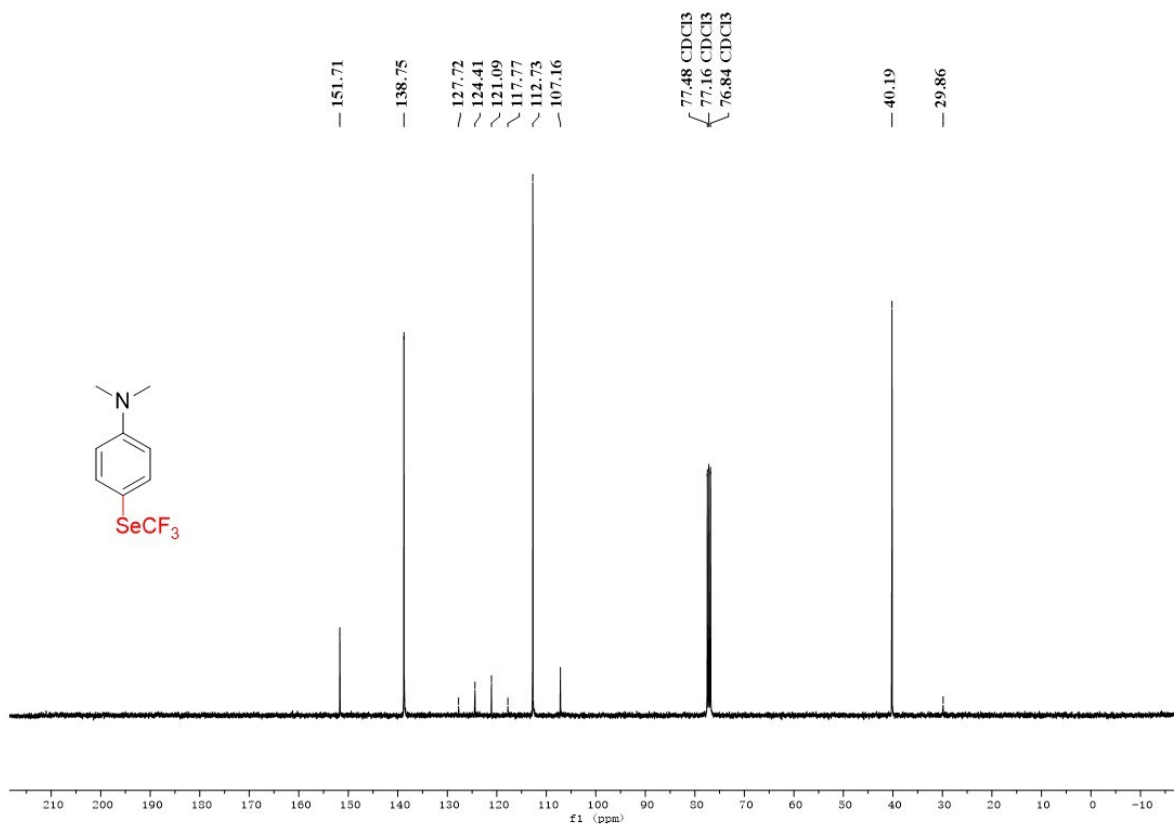

5aw (4-(4-((trifluoromethyl)selenanyl)phenyl)morpholine)

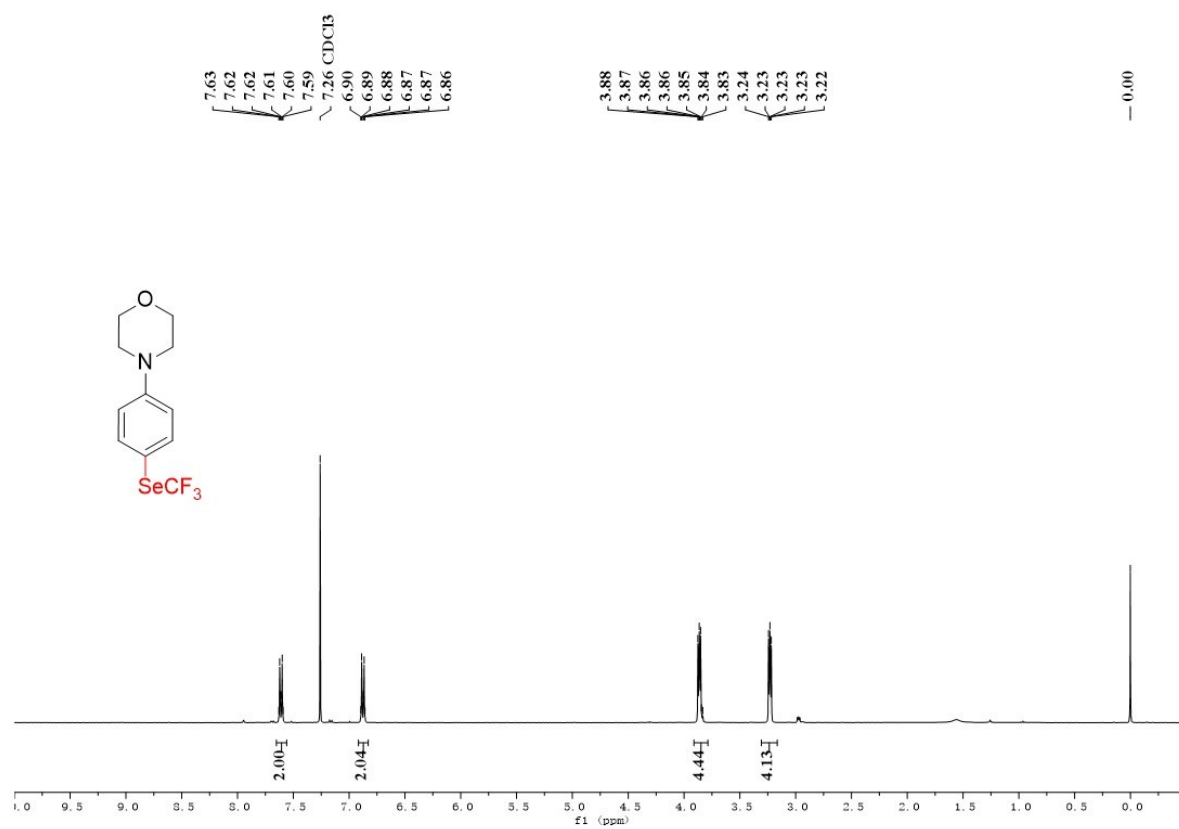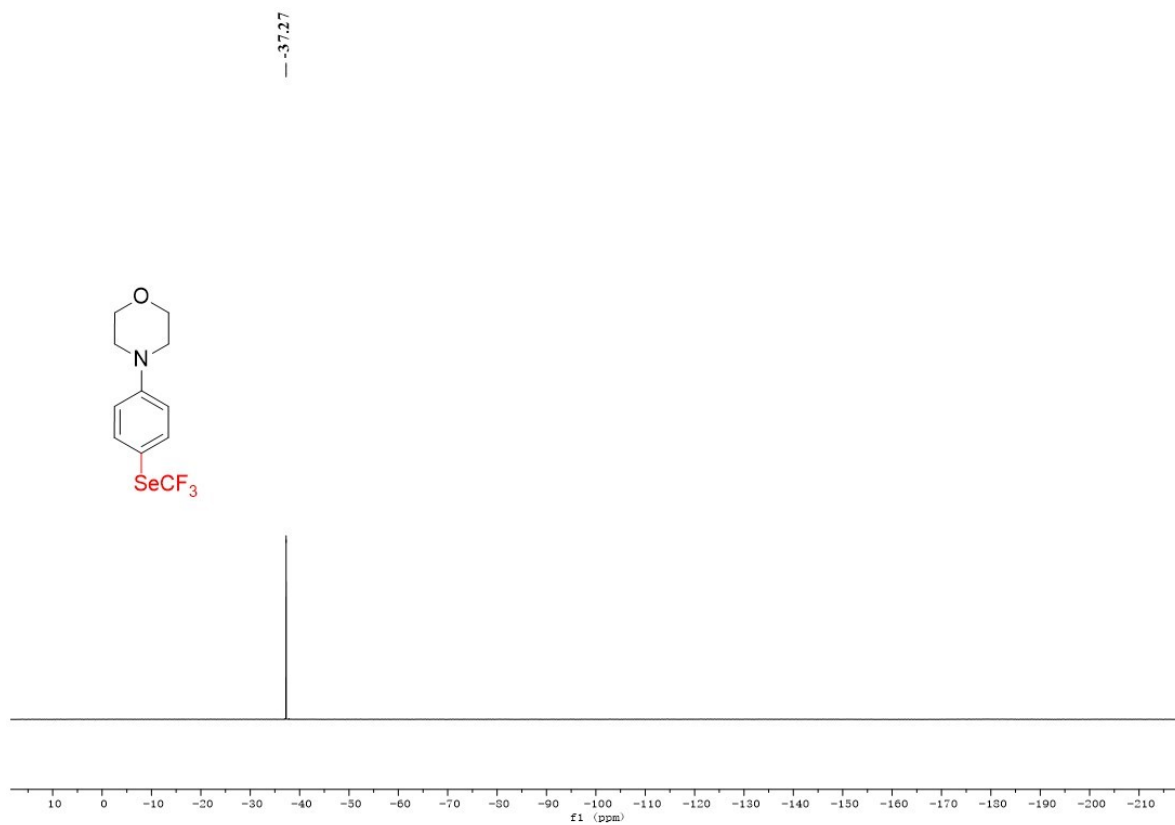

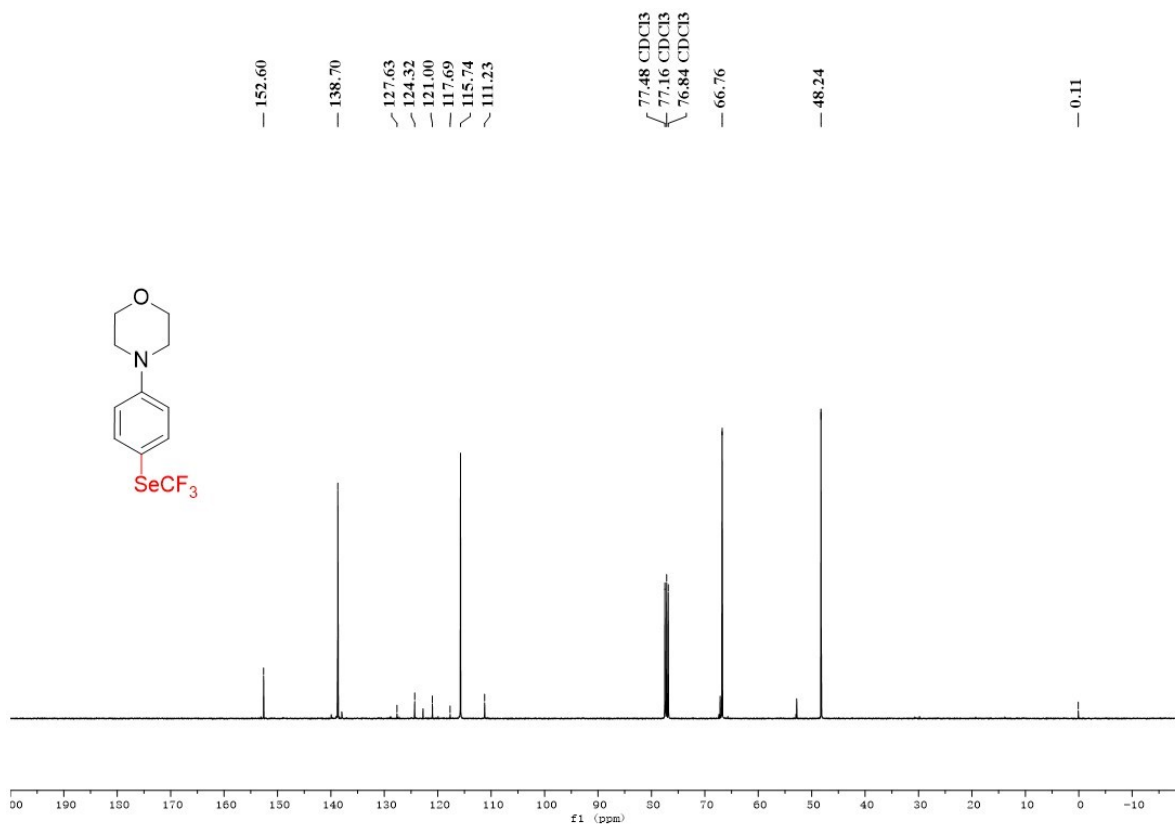

**5axa** (3-((trifluoromethyl)selenanyl)-1H-indole)

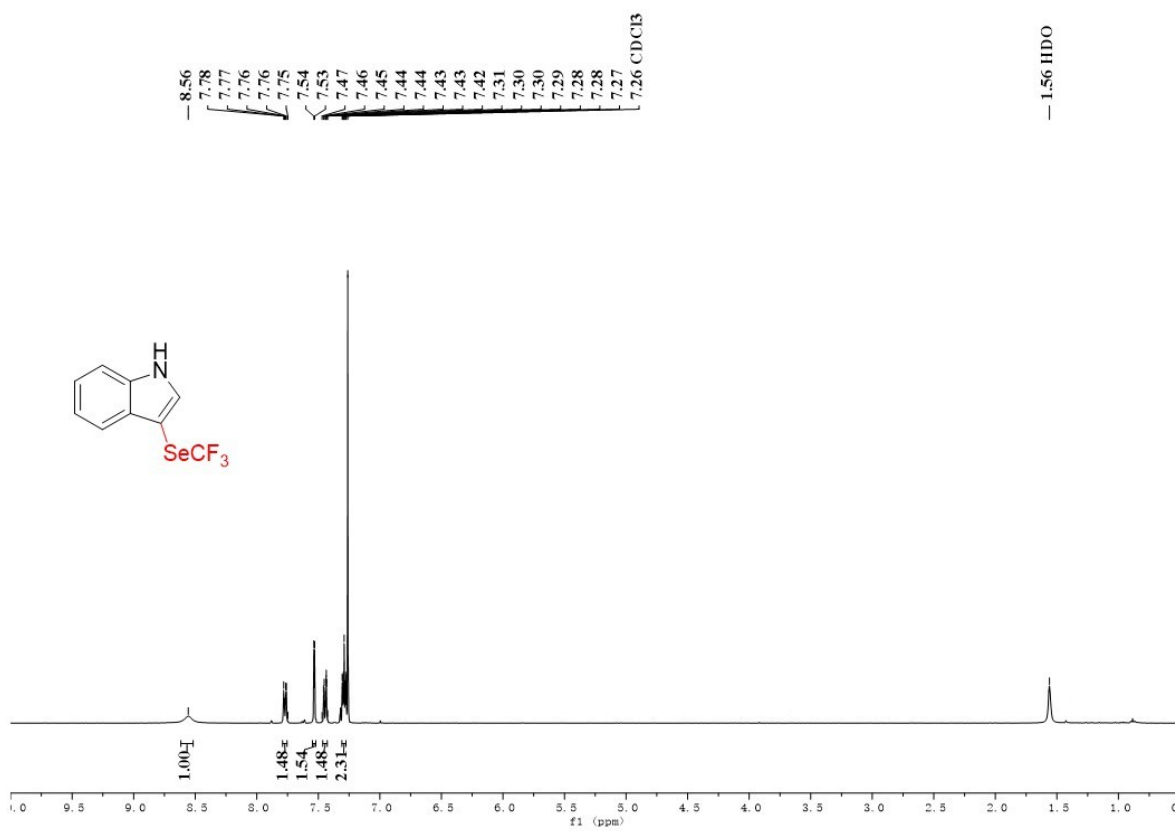

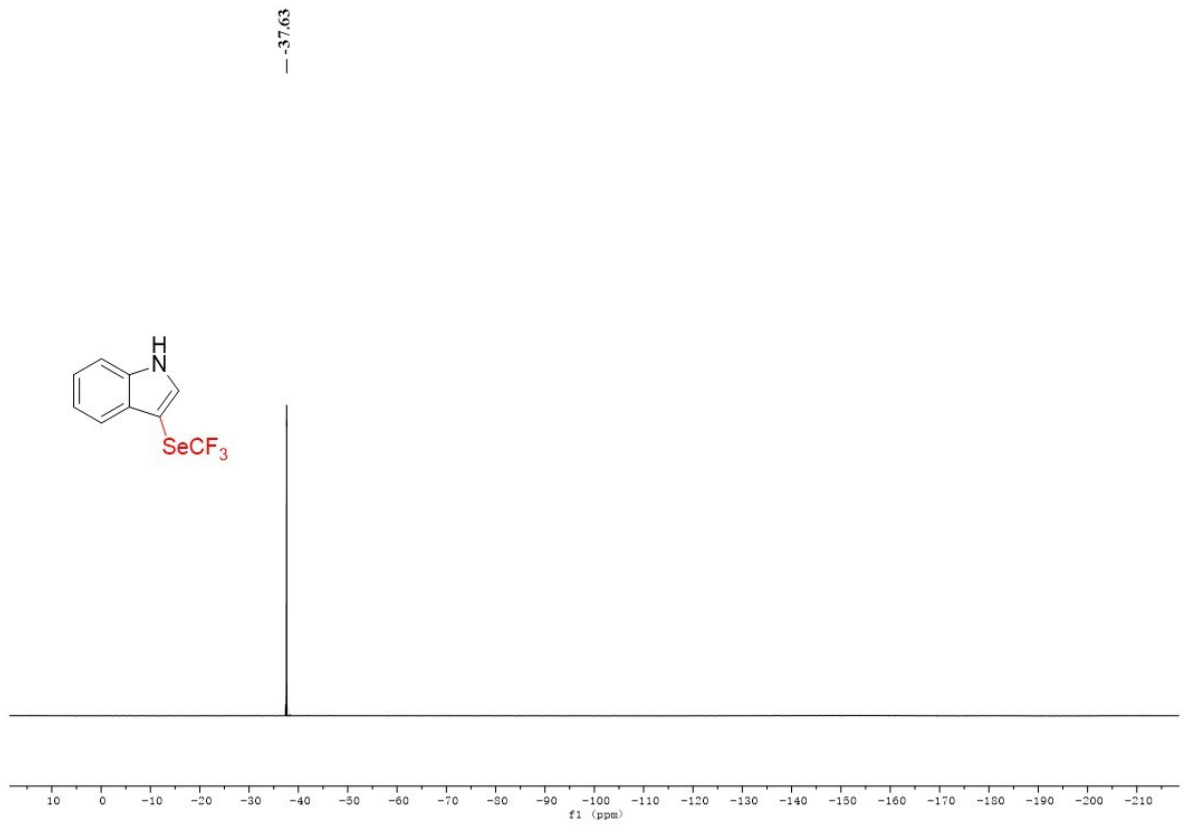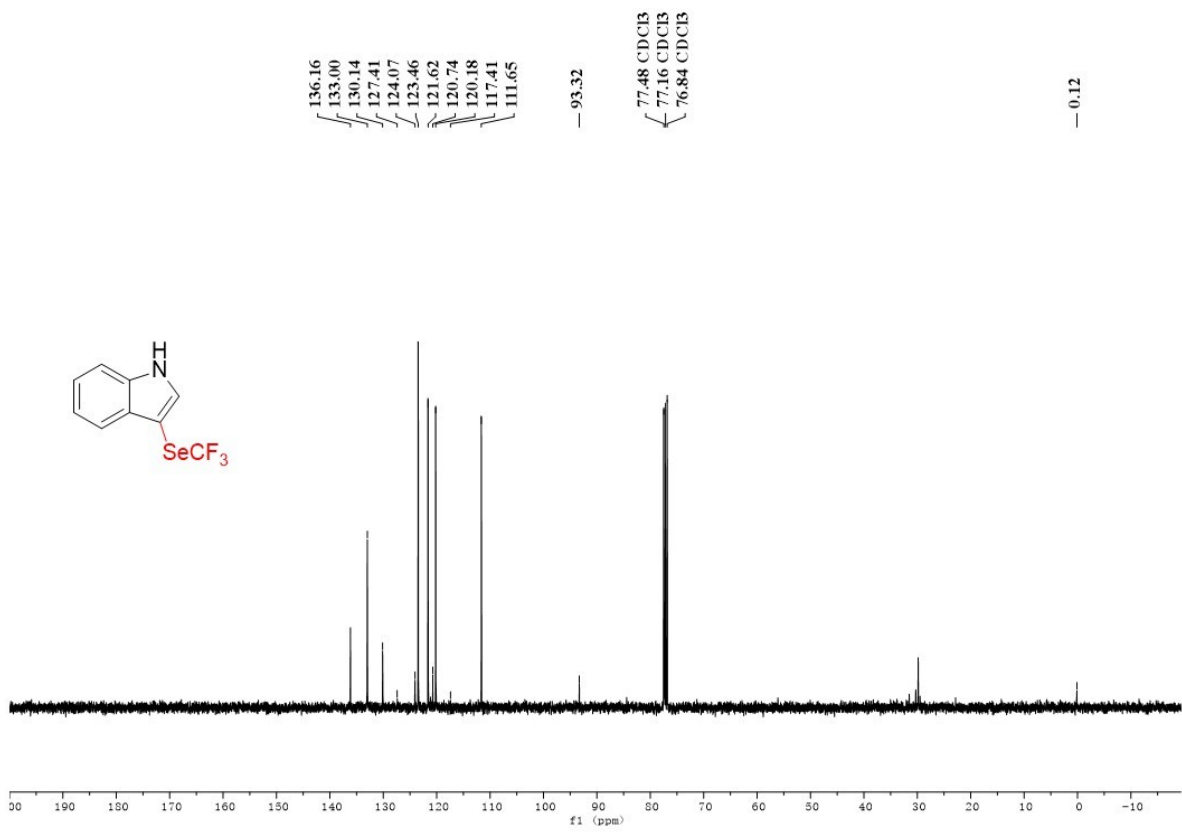

**5axb** (3-((trifluoromethyl)selanyl)-1H-indole)

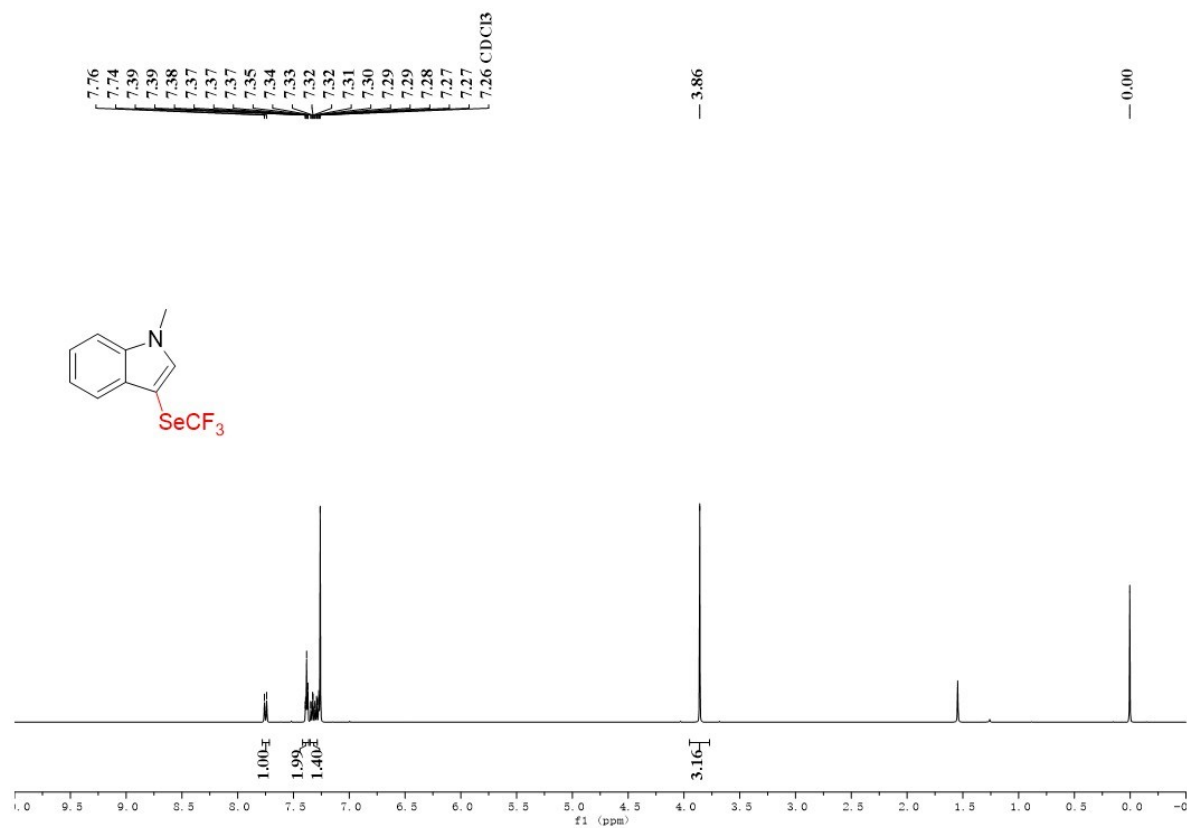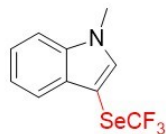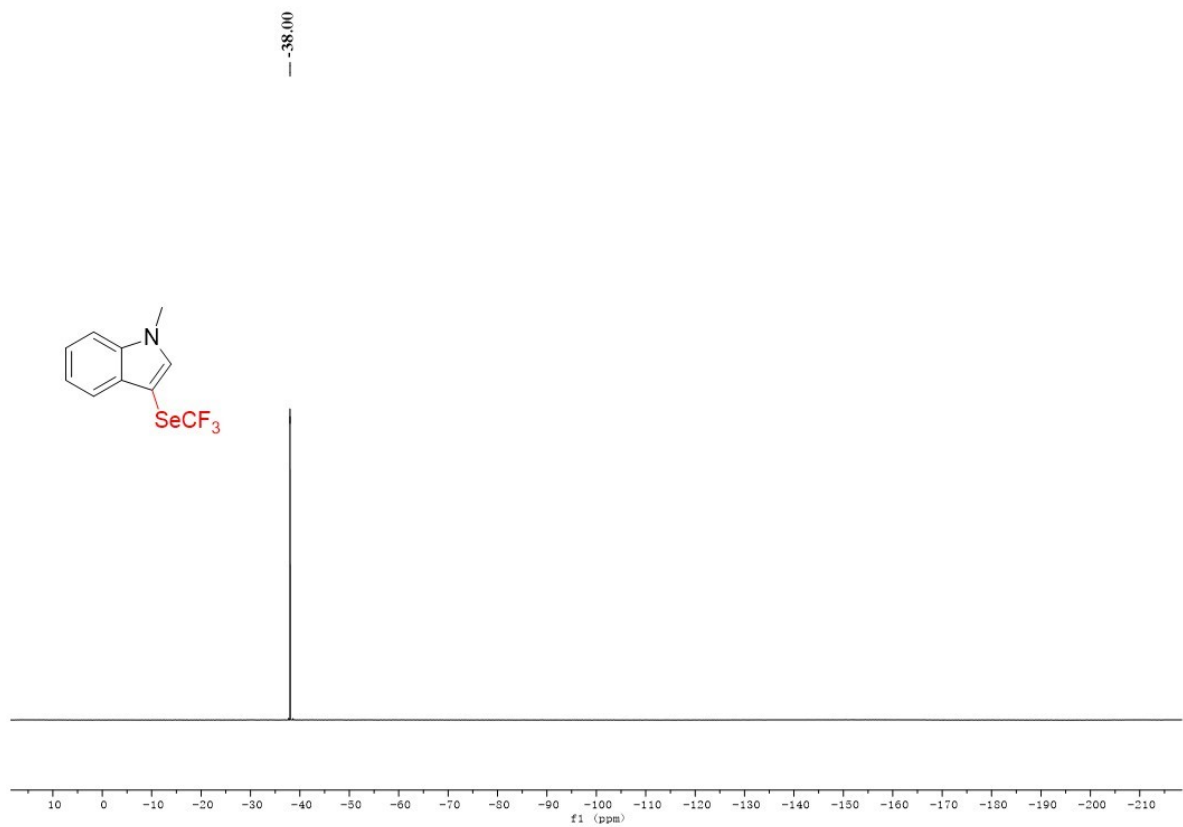

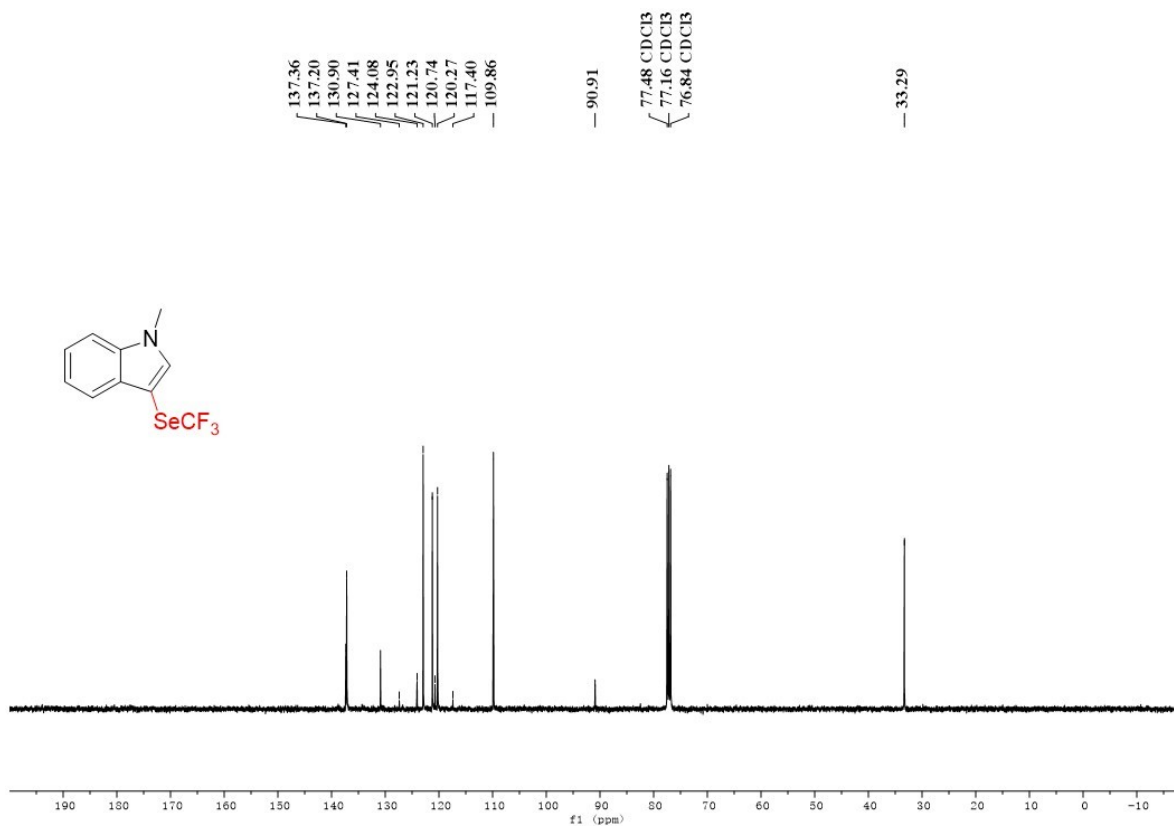

**5axc** (2-phenyl-3-((trifluoromethyl)selenyl)-1H-indole)

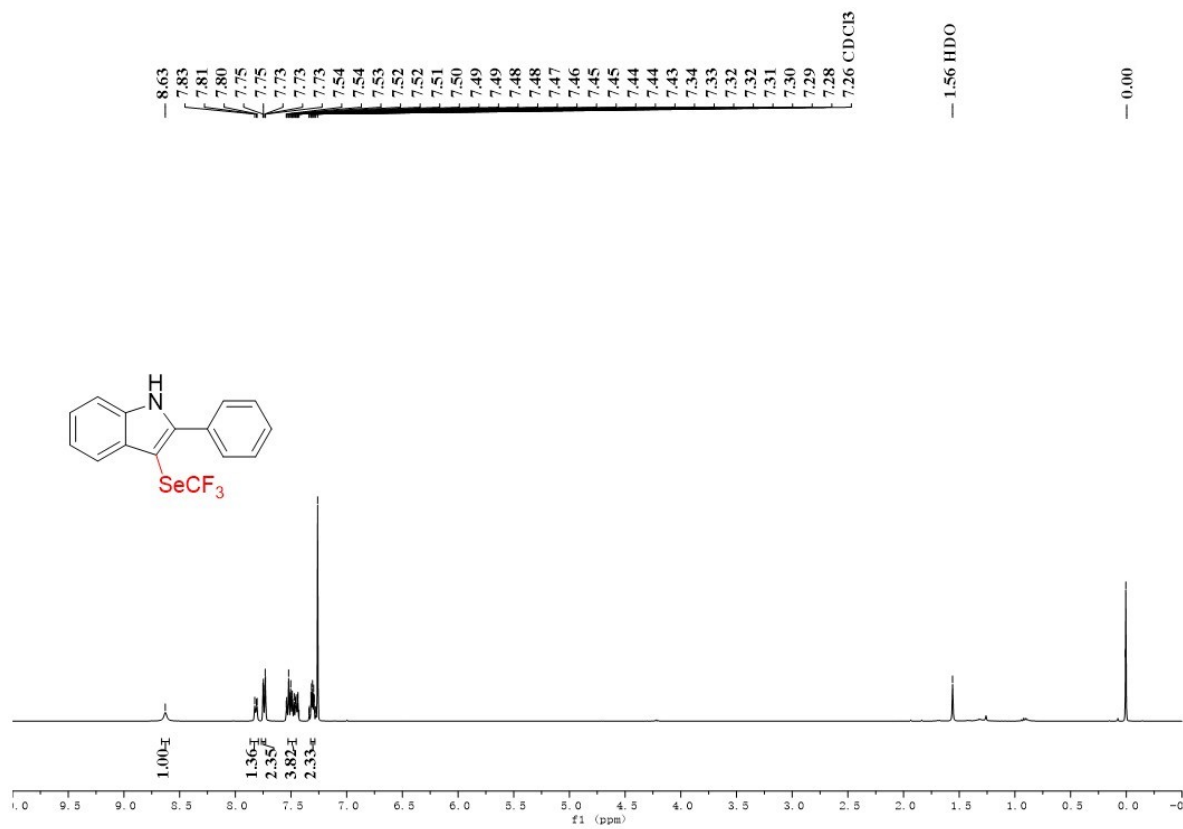



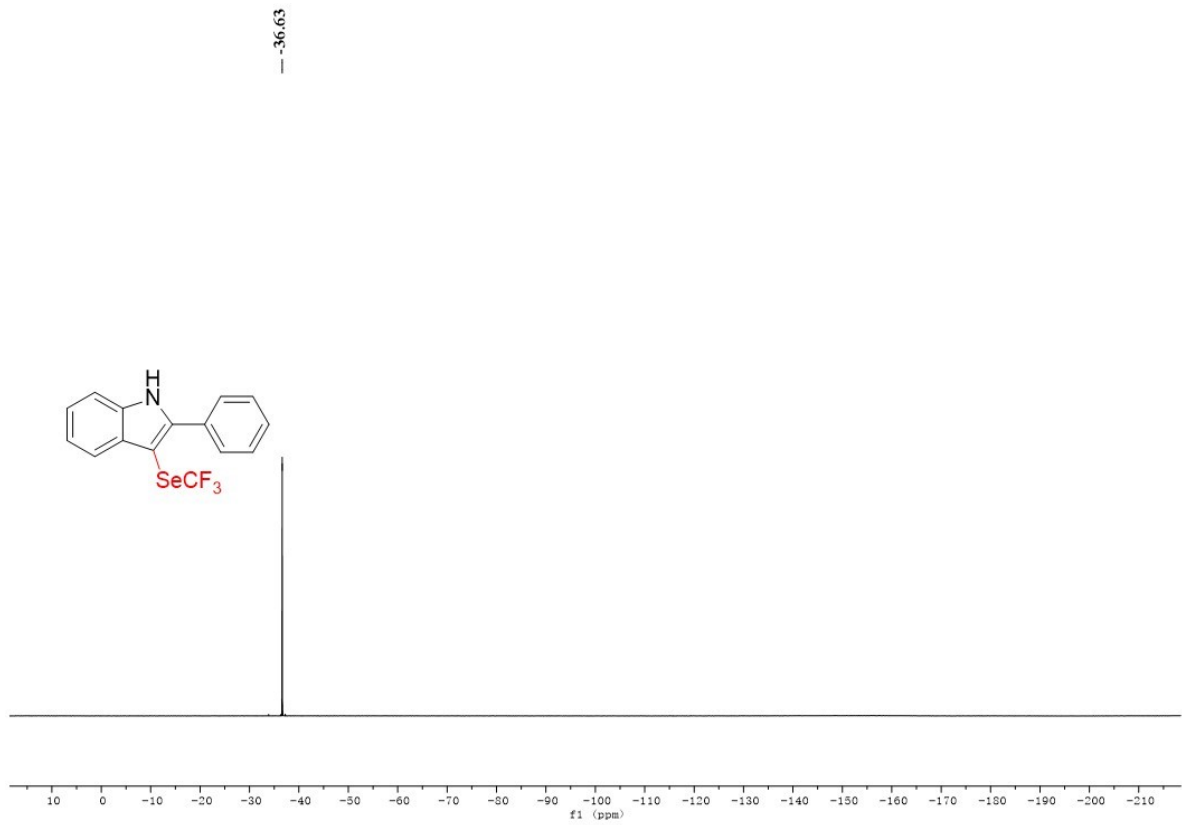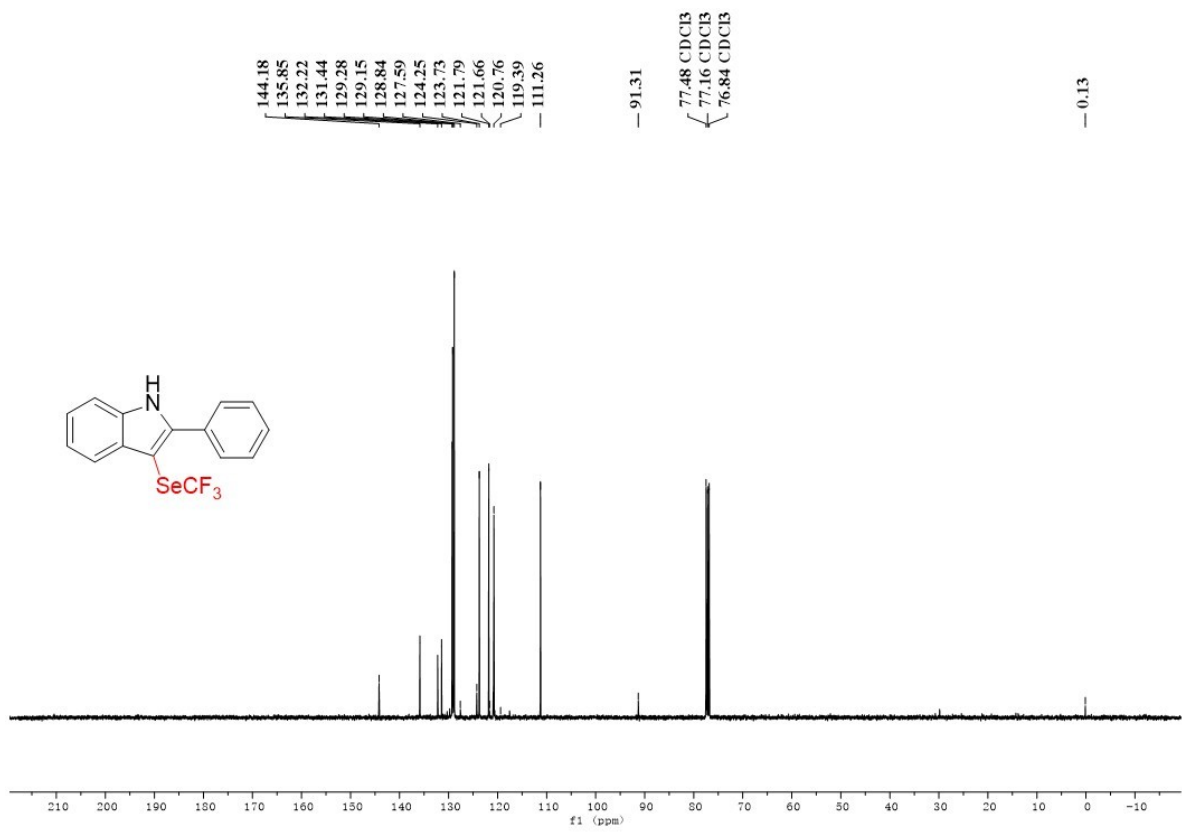

**5axd** (1-(phenylsulfonyl)-3-((trifluoromethyl)selenyl)-1H-indole)

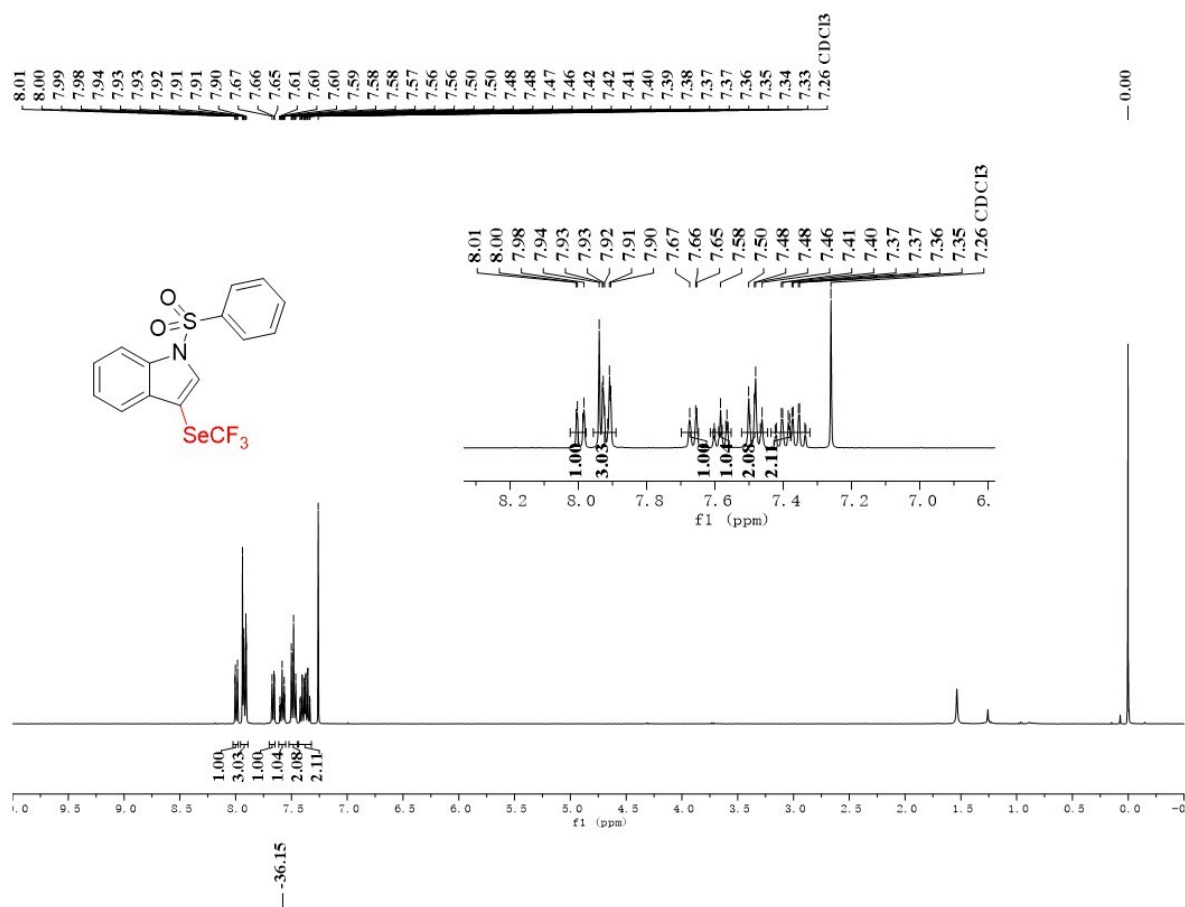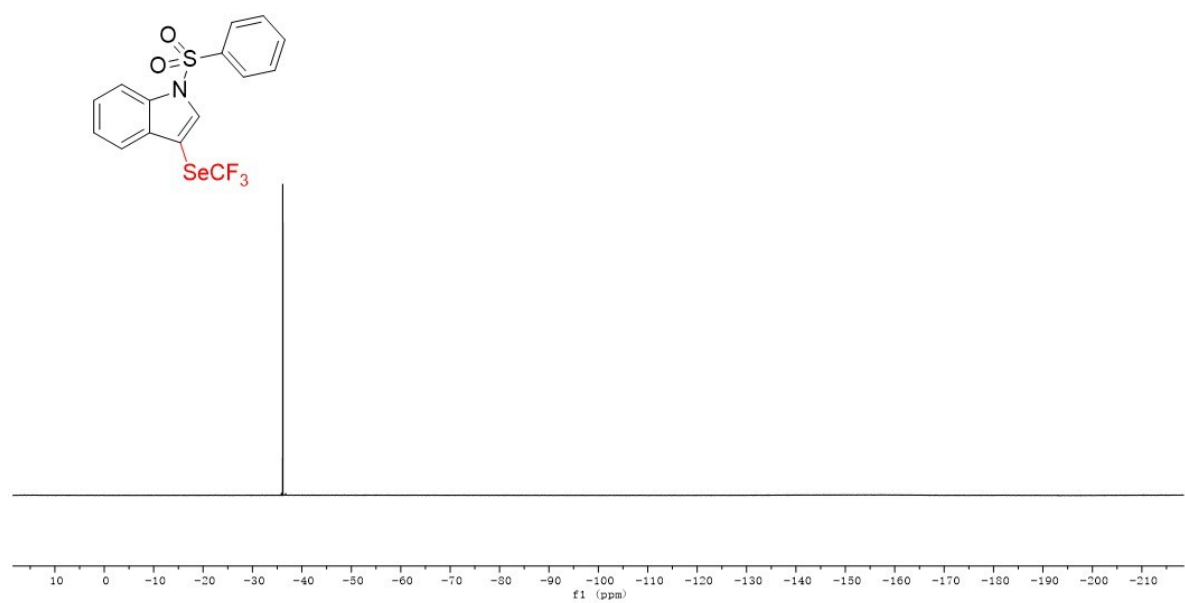

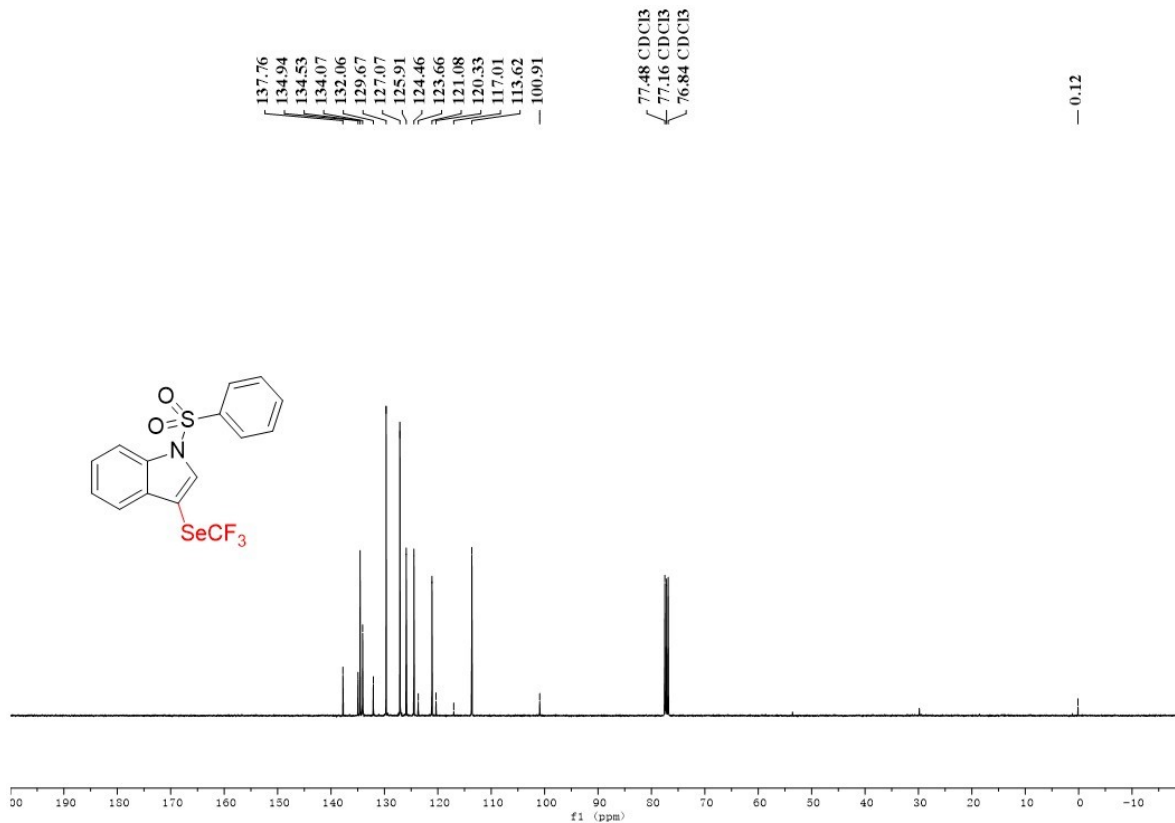

**5ay** ((2,4-dimethylphenyl)(trifluoromethyl)selane)

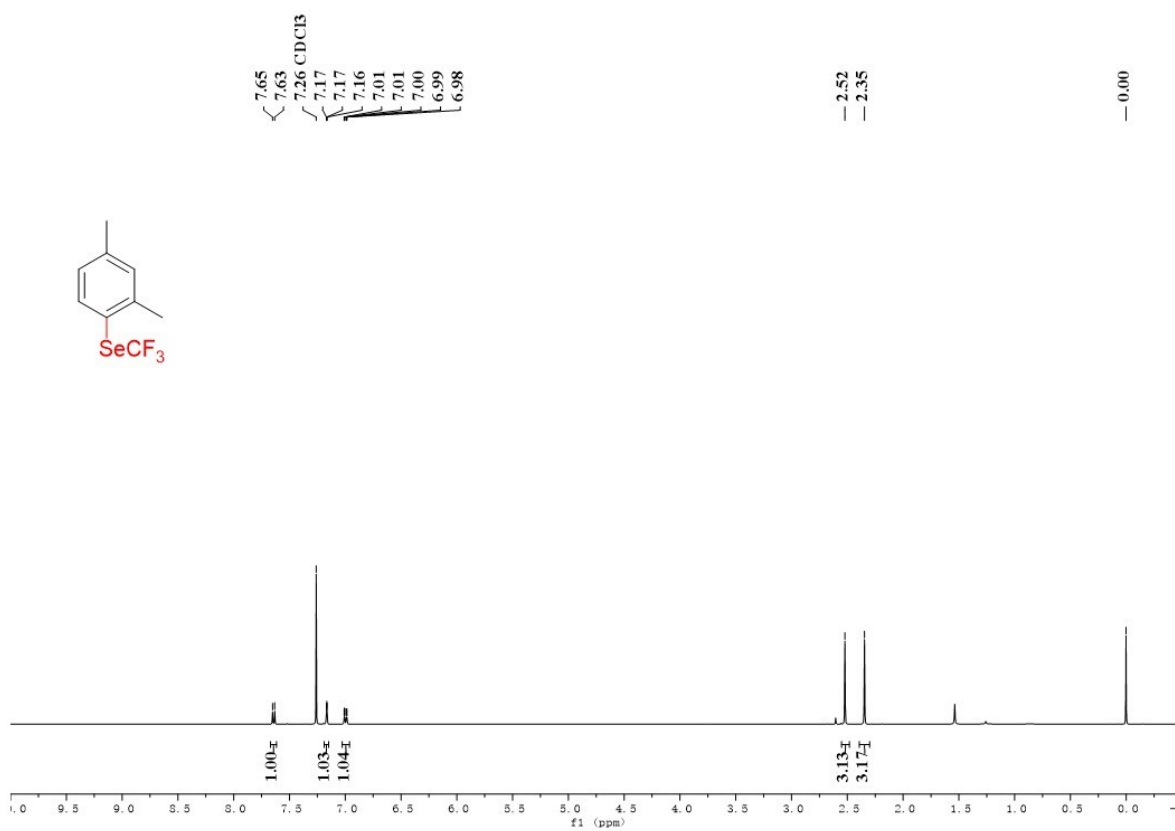

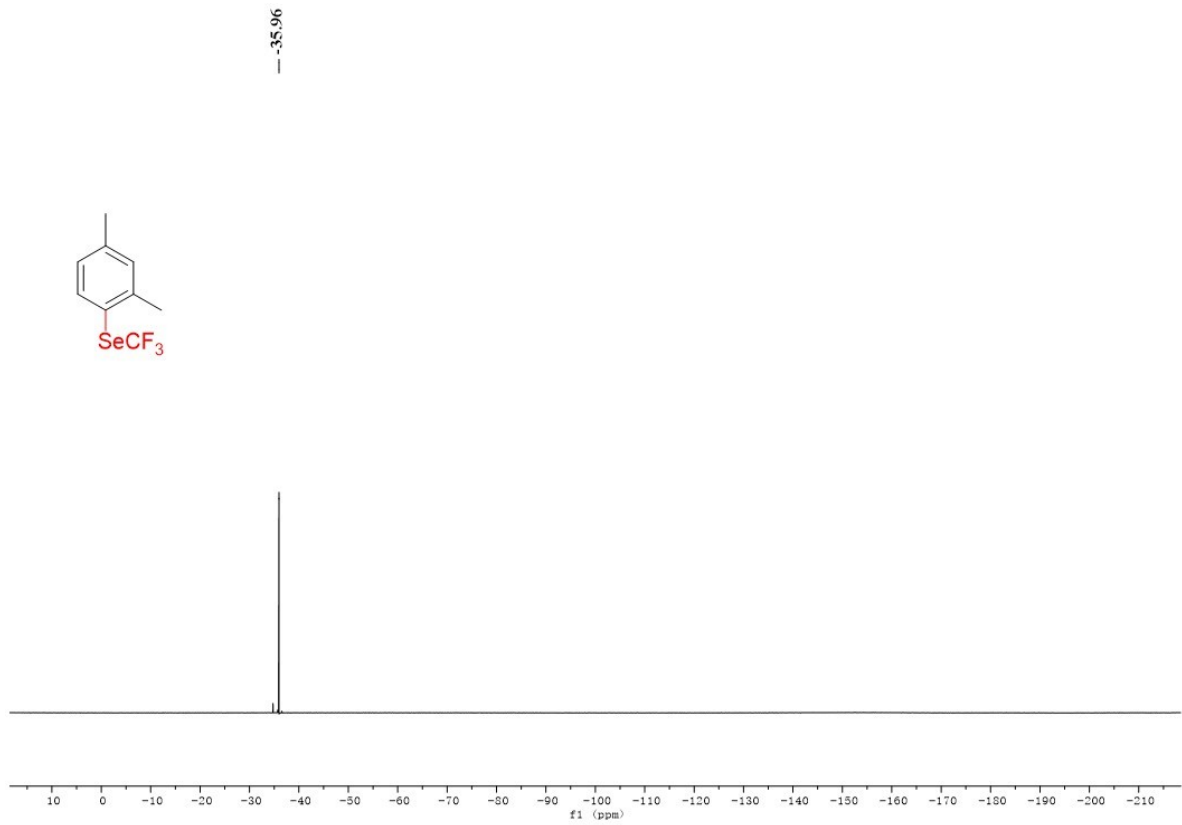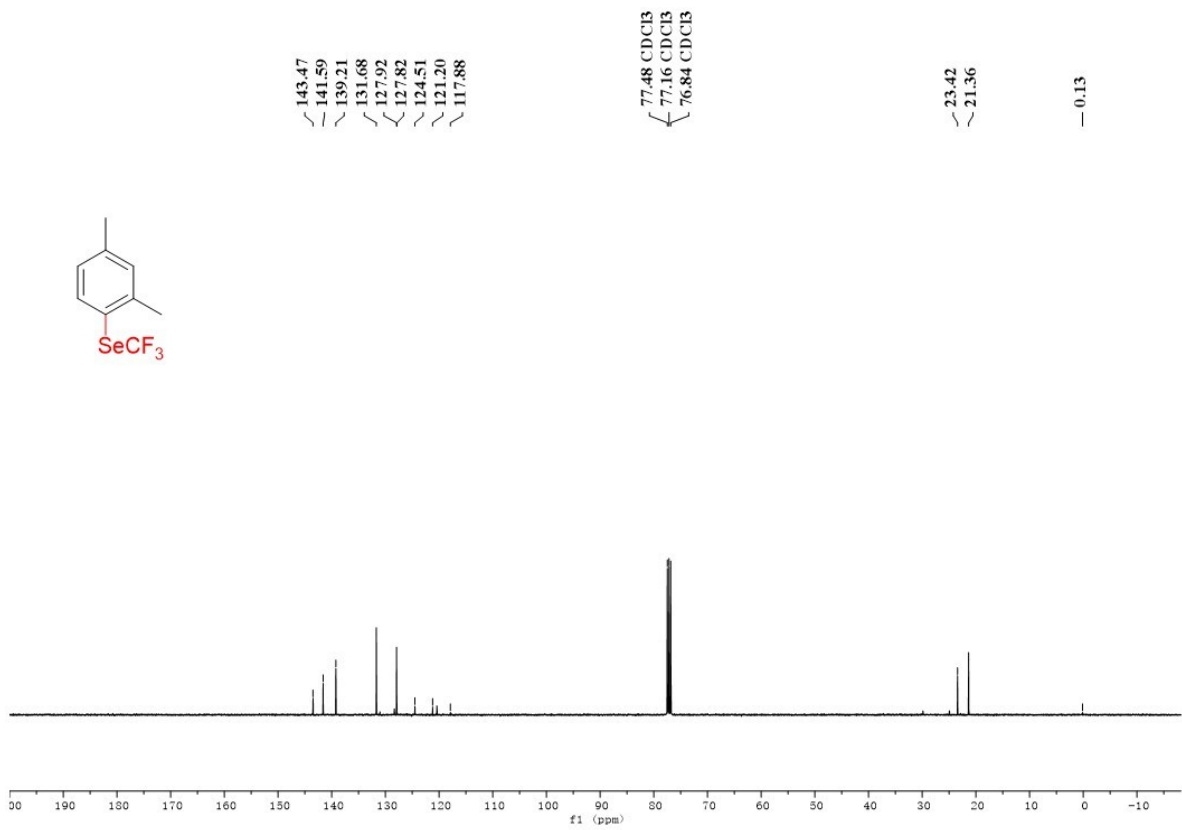

**5aza** (3-octyl-2-((trifluoromethyl)selanyl)thiophene)

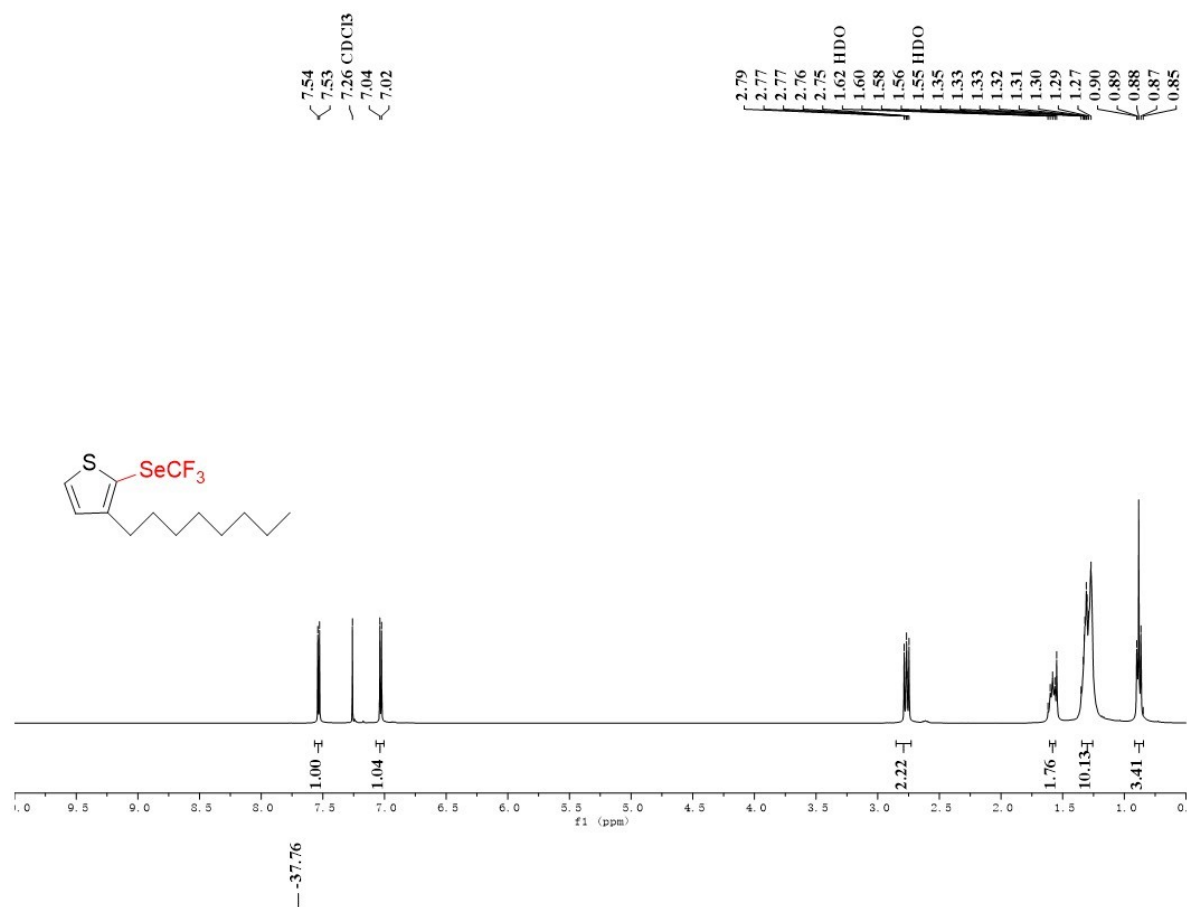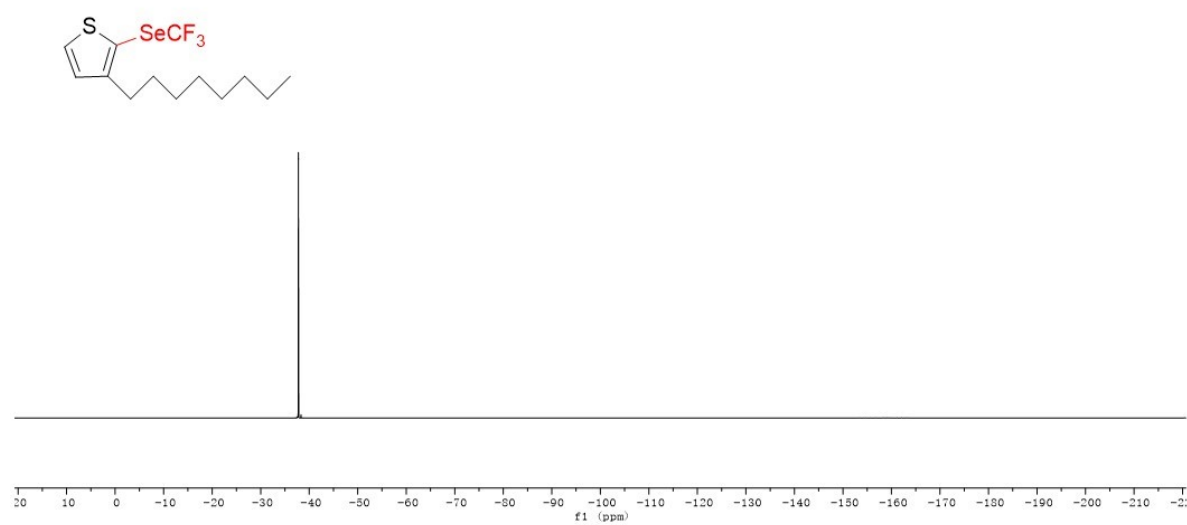

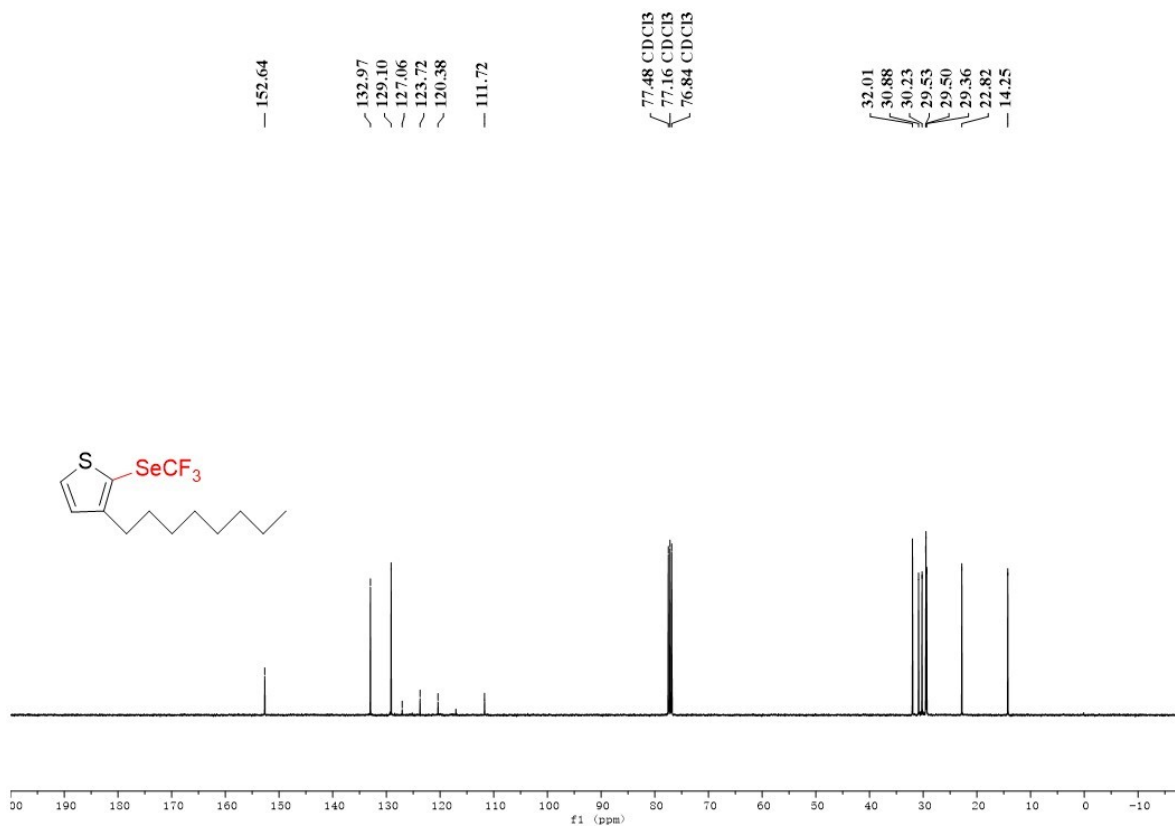

**5azb** 1-(5-((trifluoromethyl)selanyl)-1H-pyrrol-2-yl)ethan-1-one

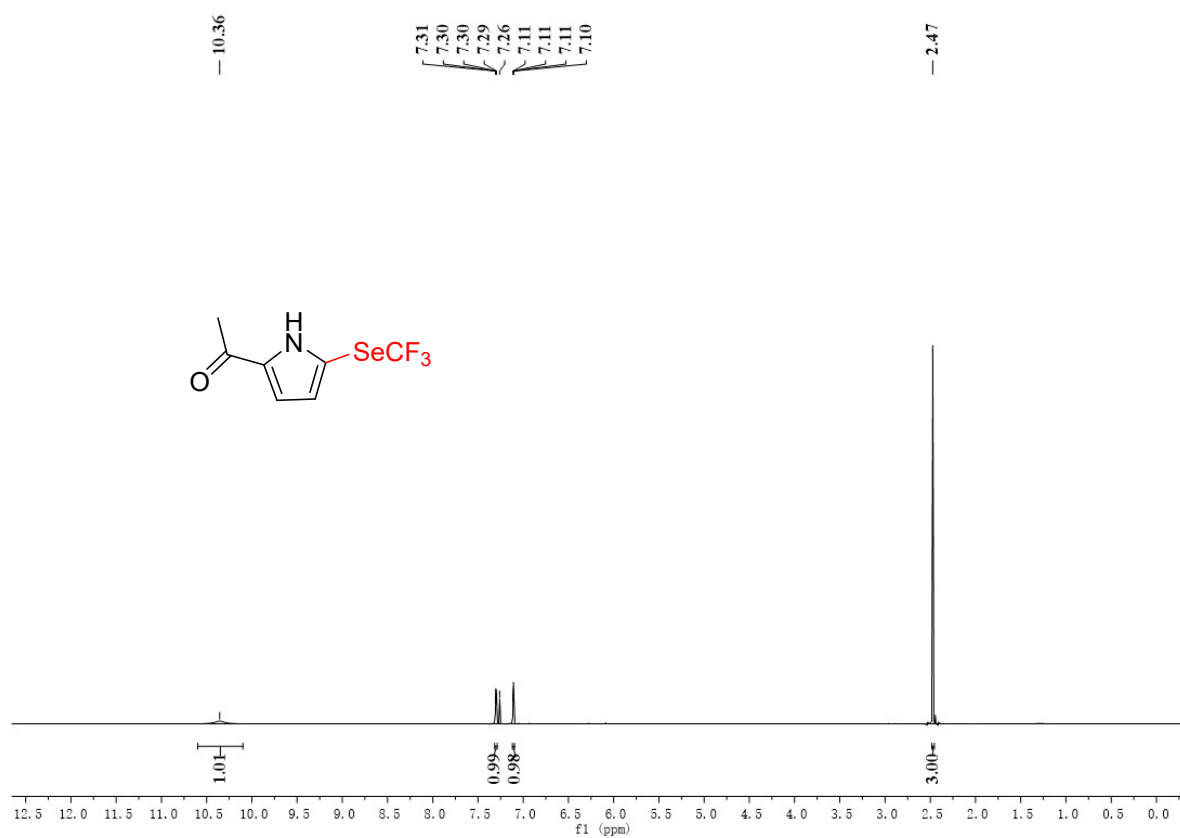

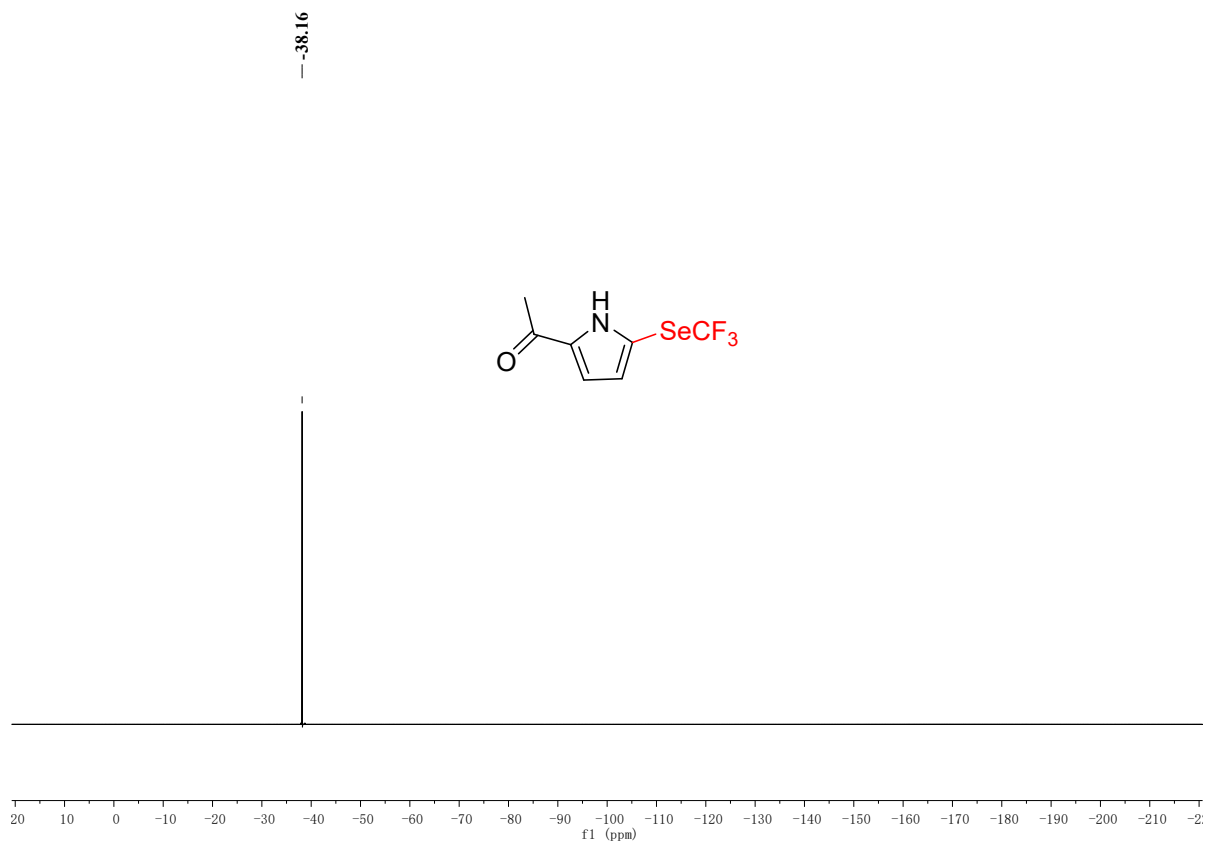

188.43

133.41  
132.14  
127.04  
123.74  
120.41  
117.09

100.25

77.48  
77.36  
77.16  
76.84

25.69

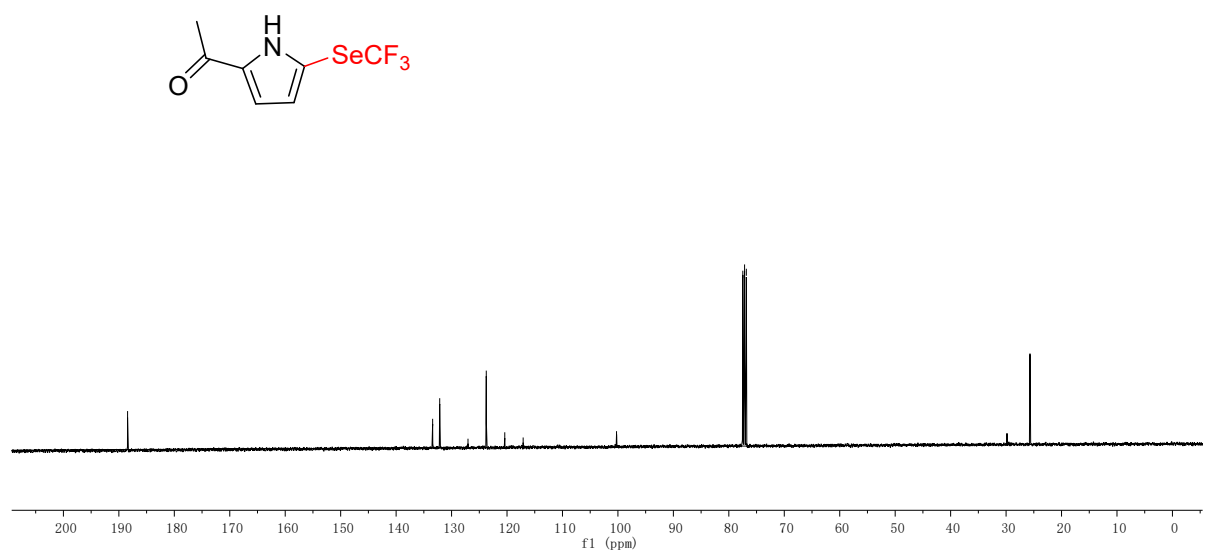

**5azc** bis(5-((trifluoromethyl)selanyl)-1H-pyrrol-2-yl)methane

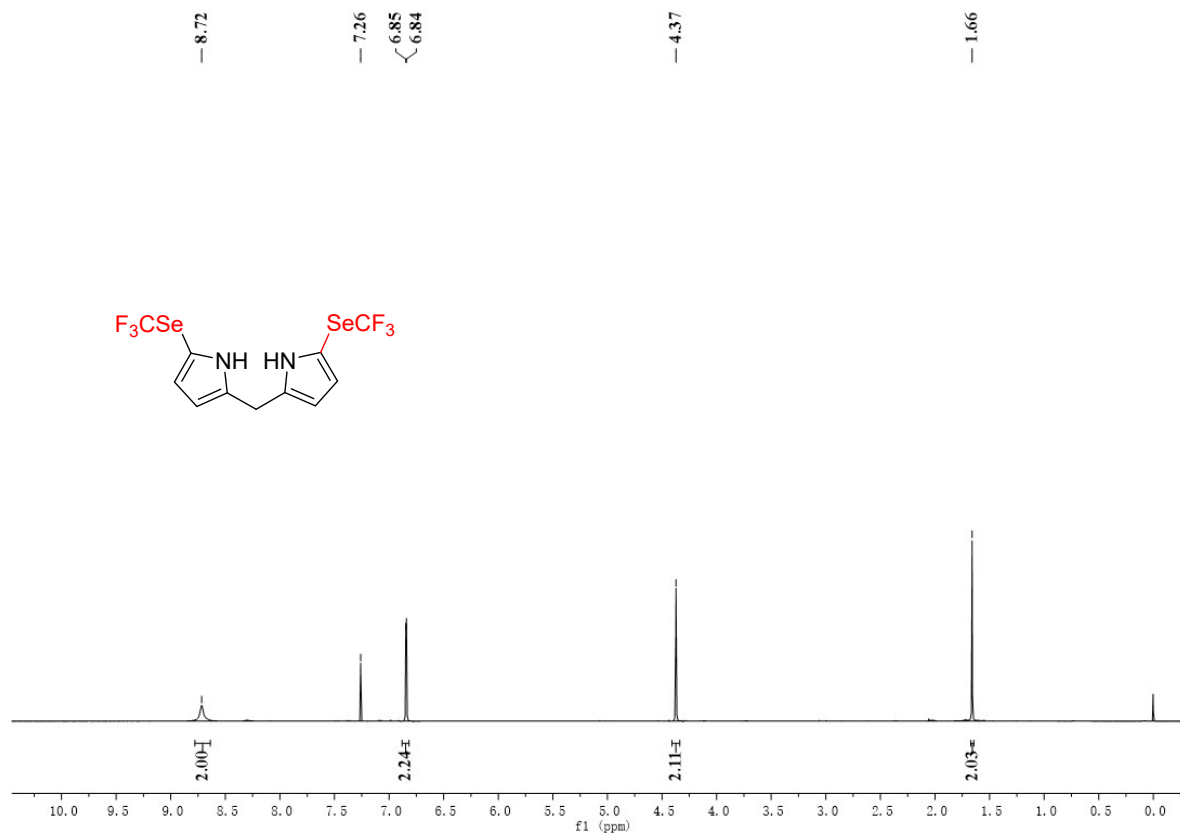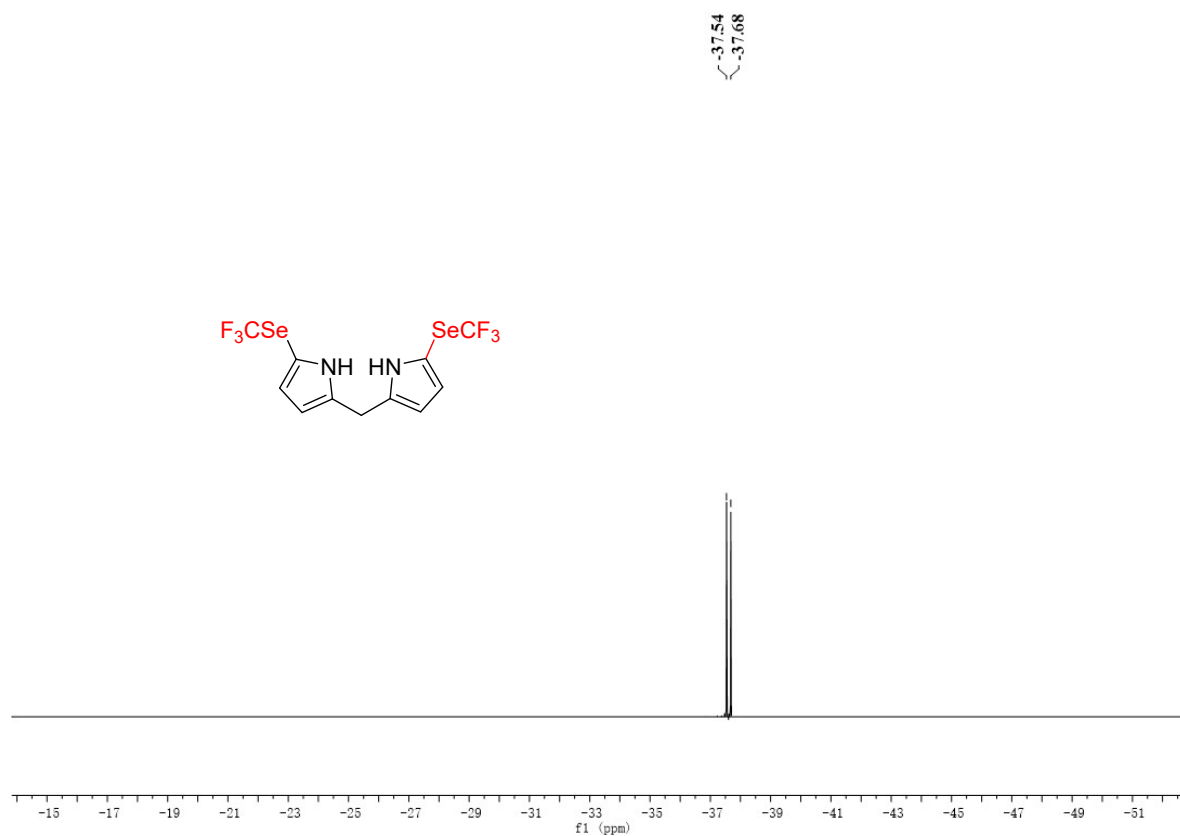



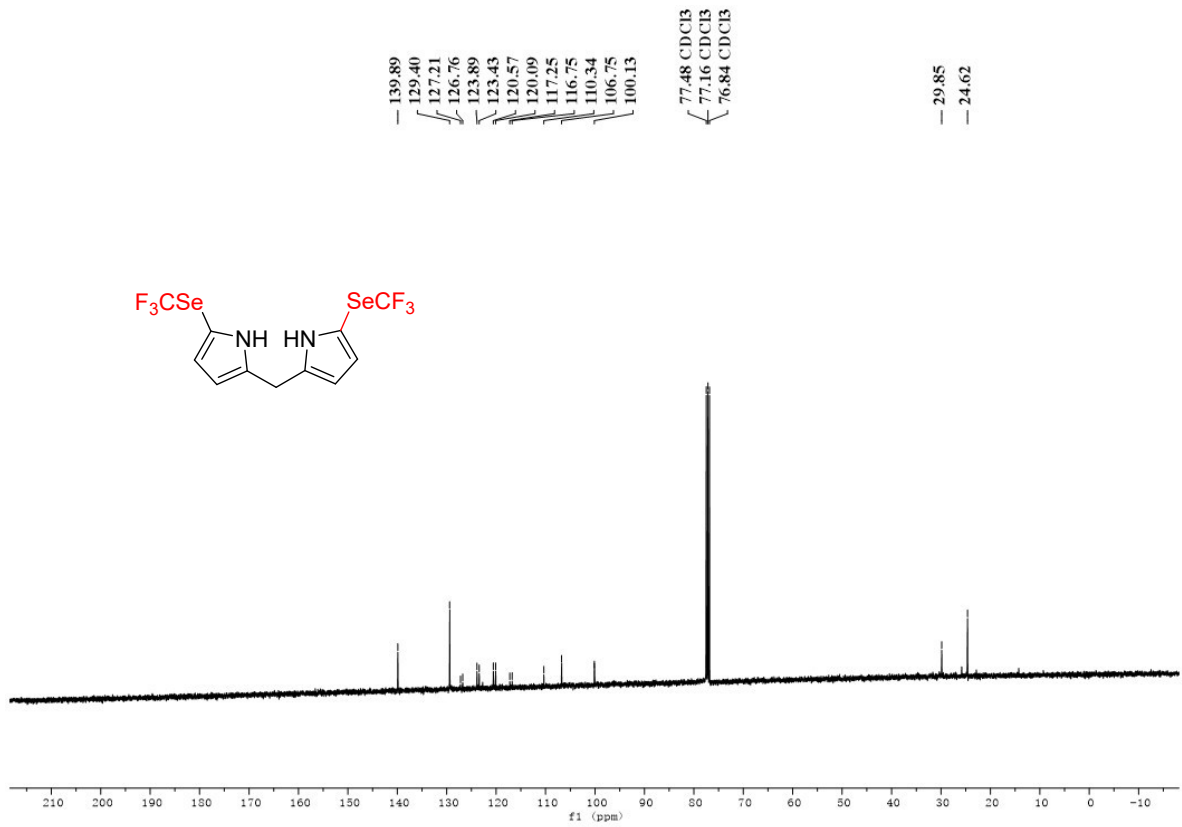

**5ba** ((2,5-dimethoxy-1,4-phenylene)bis((trifluoromethyl)selane))

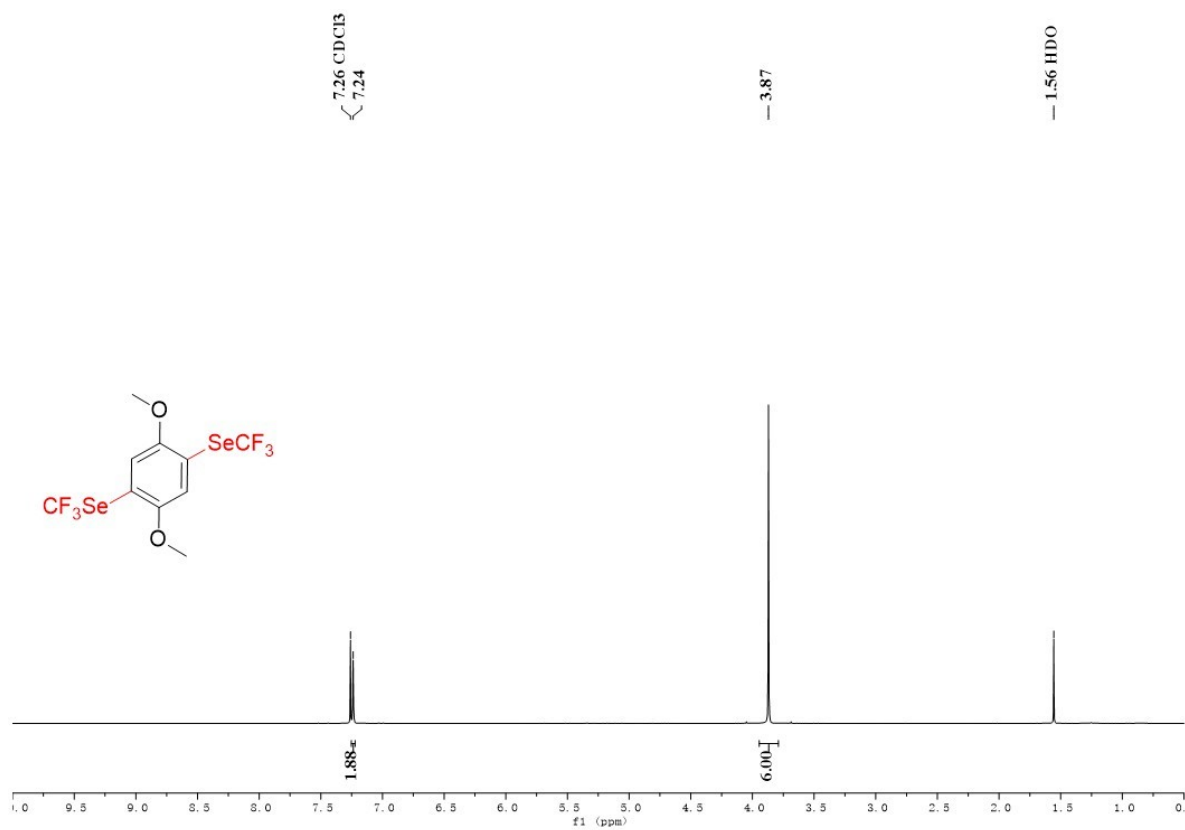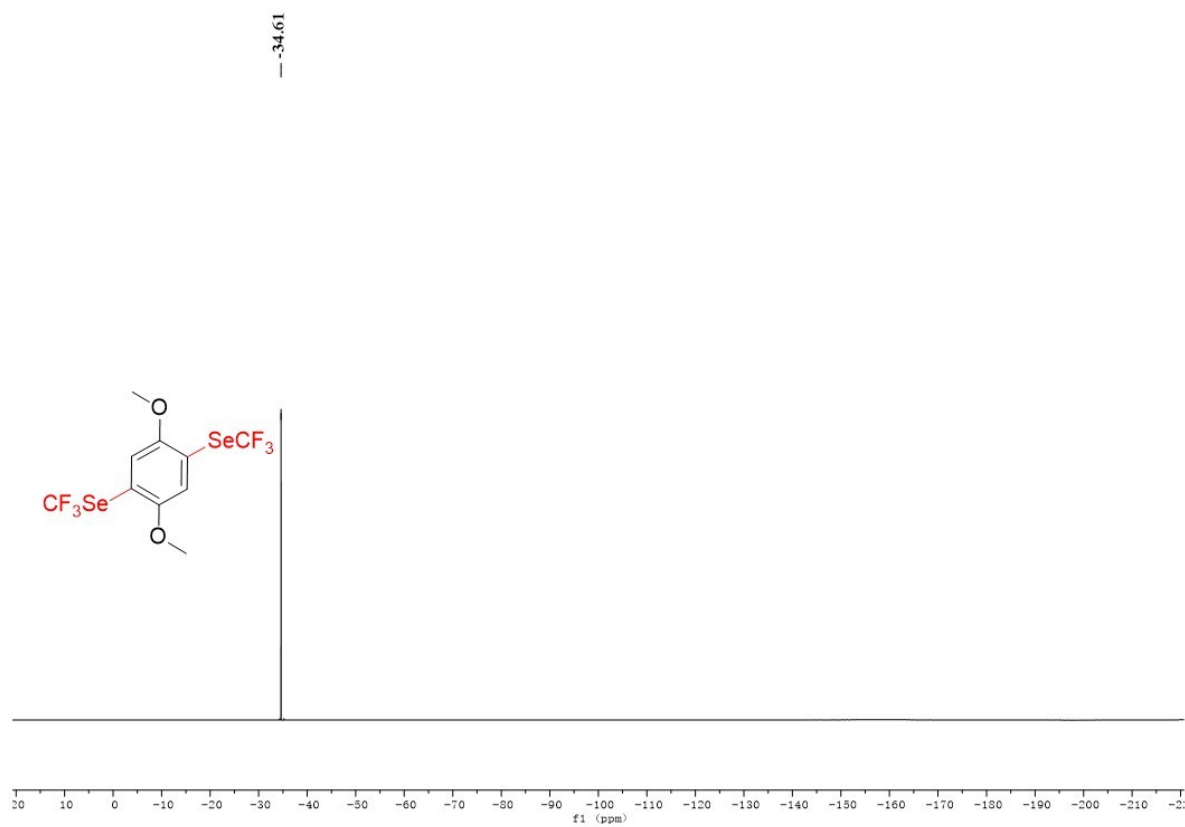

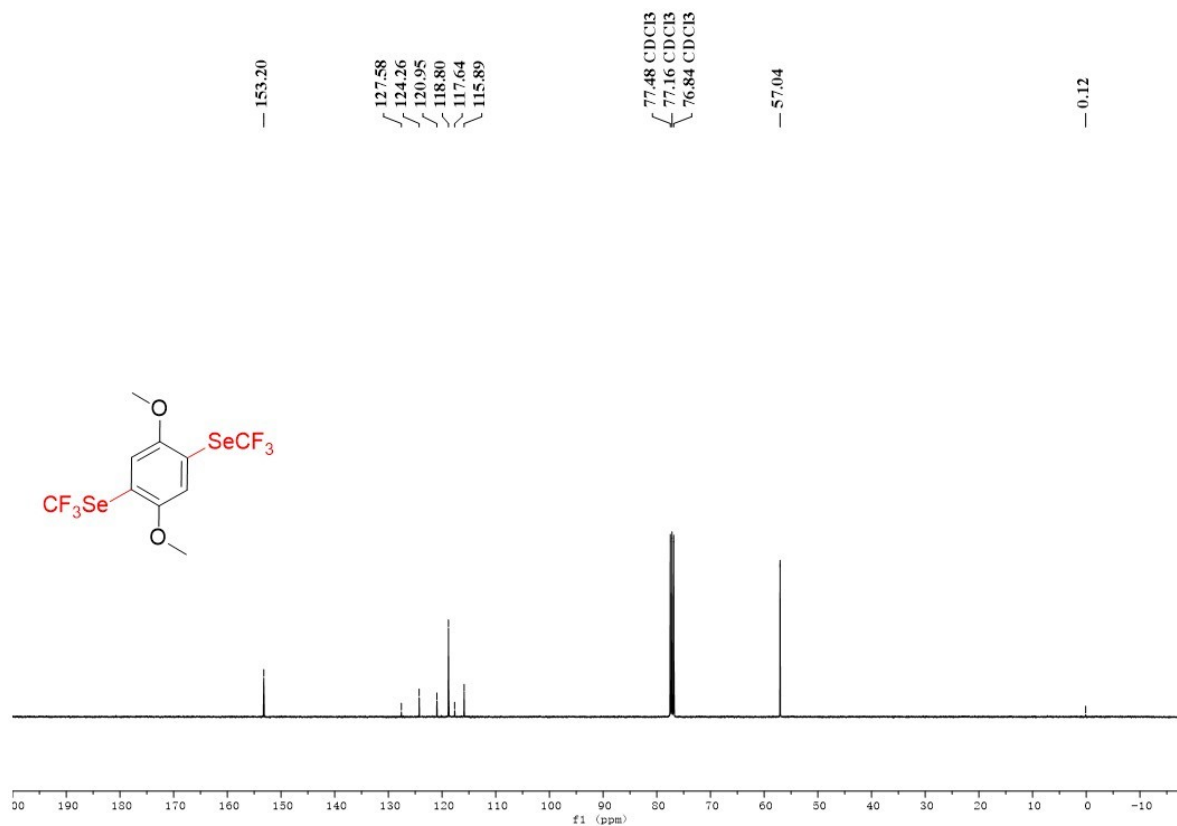

**5bb** (1,6-bis((trifluoromethyl)selenyl)naphthalen-2-ol)

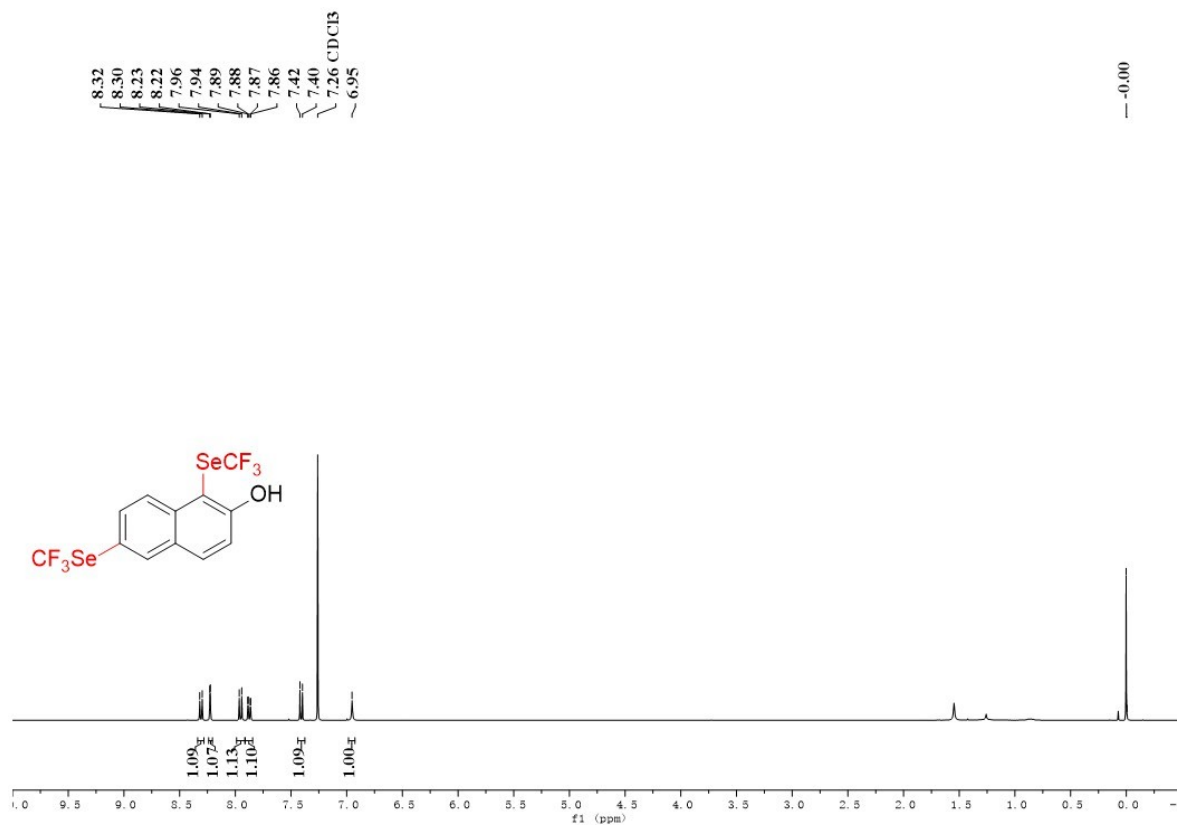

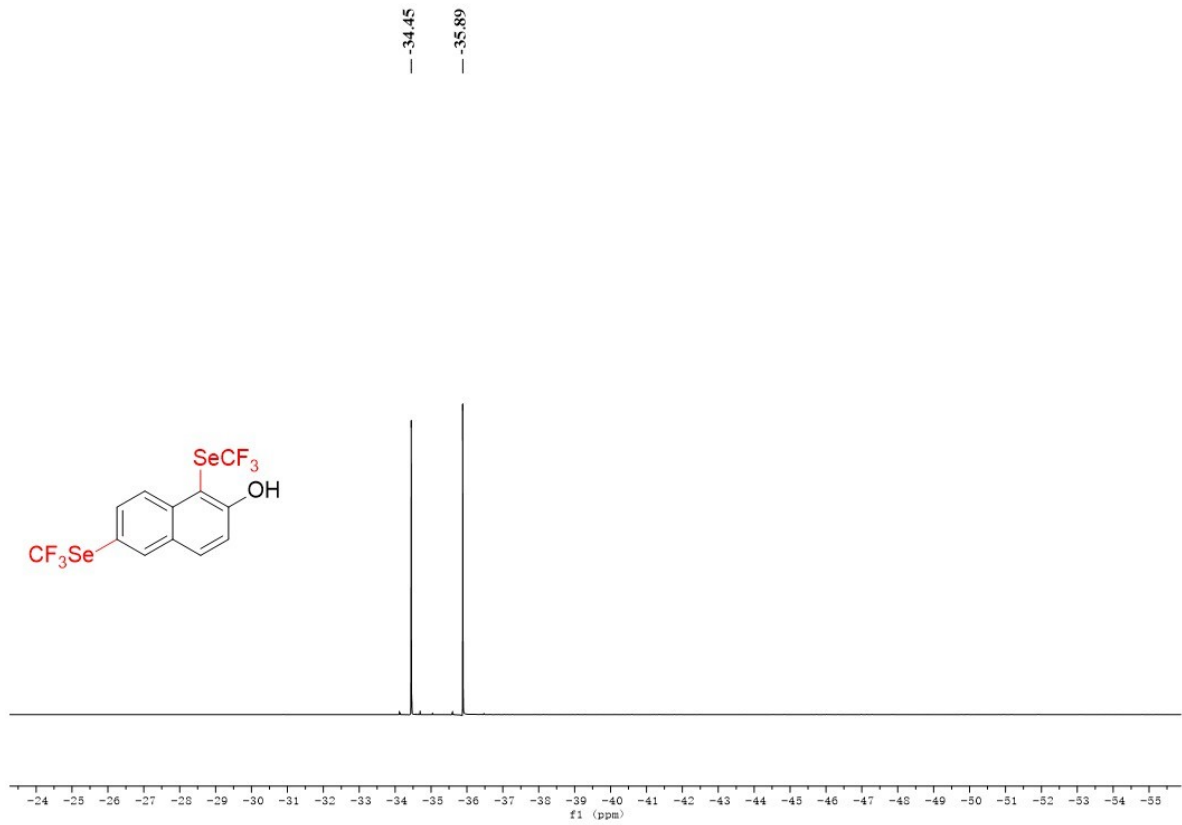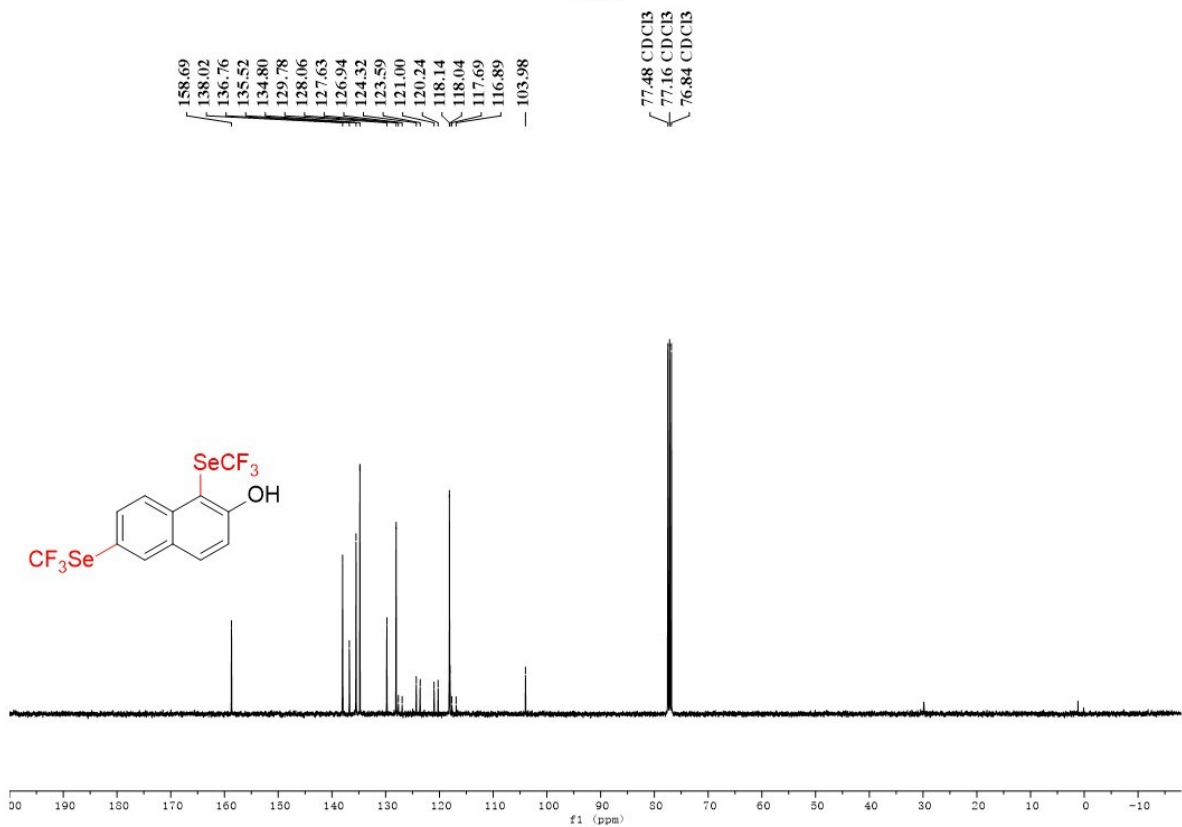

**5bc** (methyl (S)-2-((tert-butoxycarbonyl)amino)-3-(4-hydroxy-3,5-bis((trifluoromethyl)selenanyl)phenyl)propanoate)

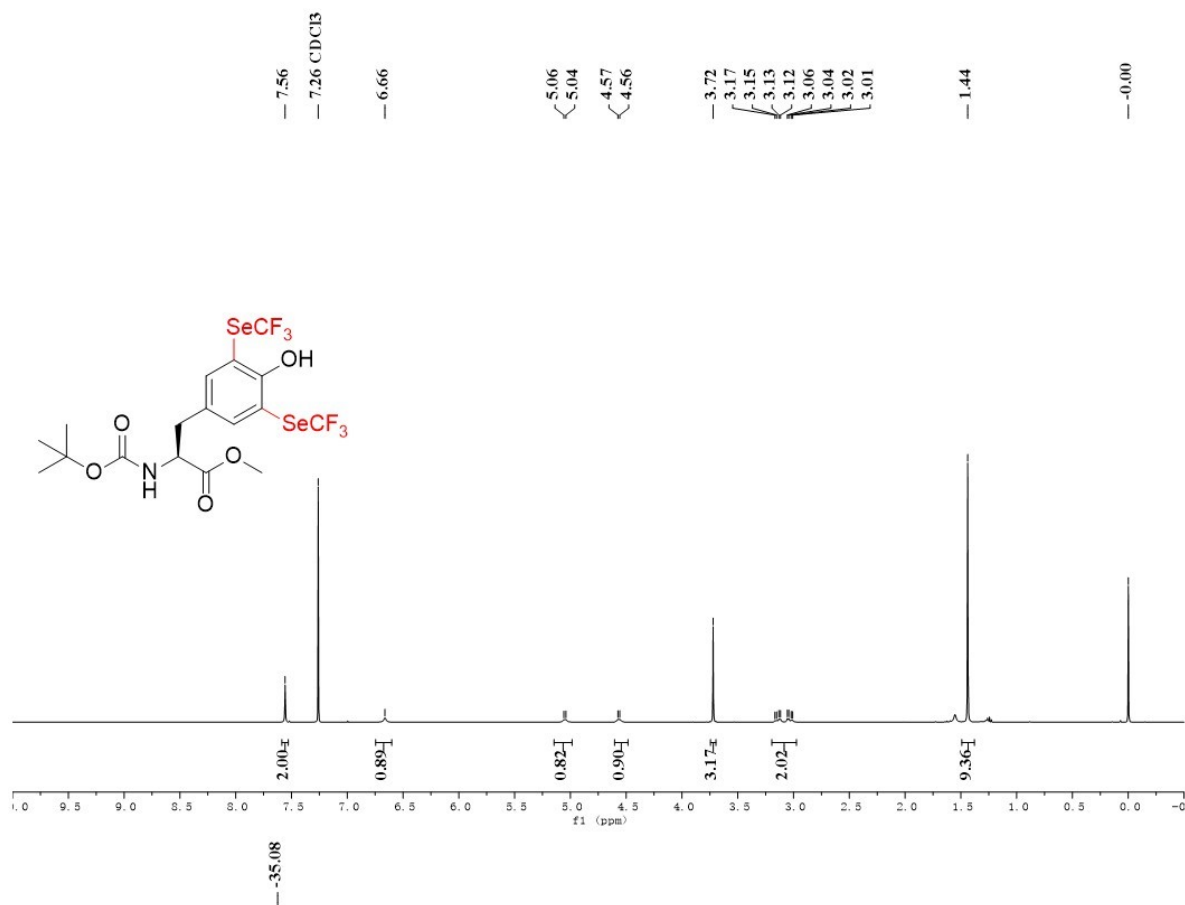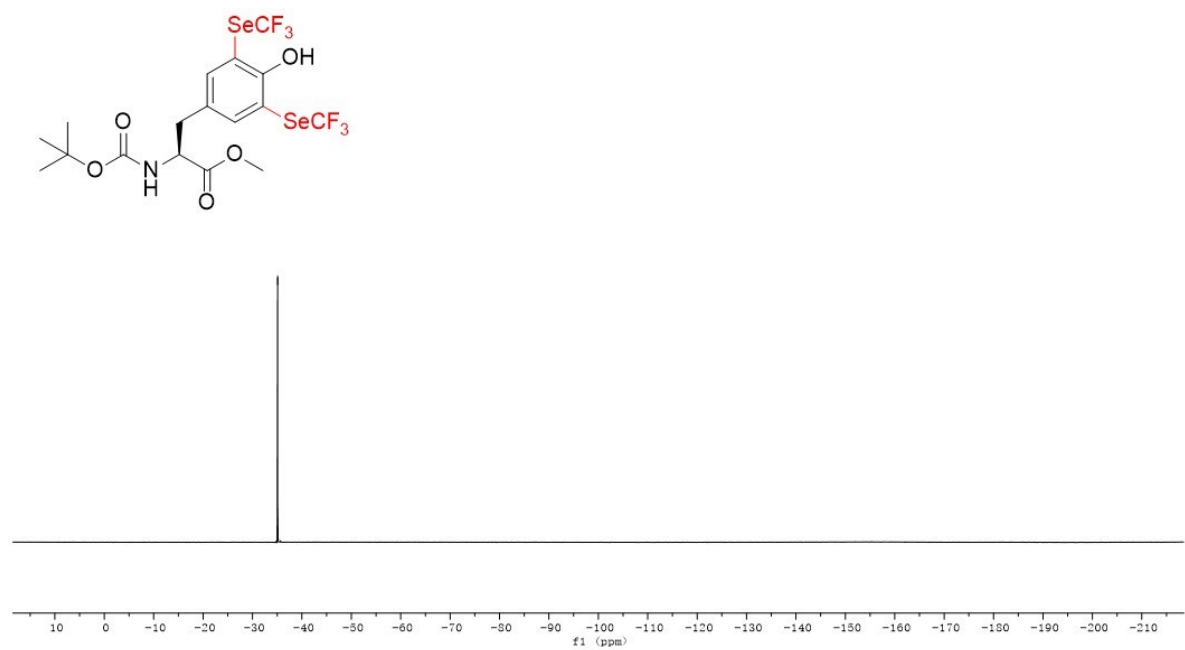

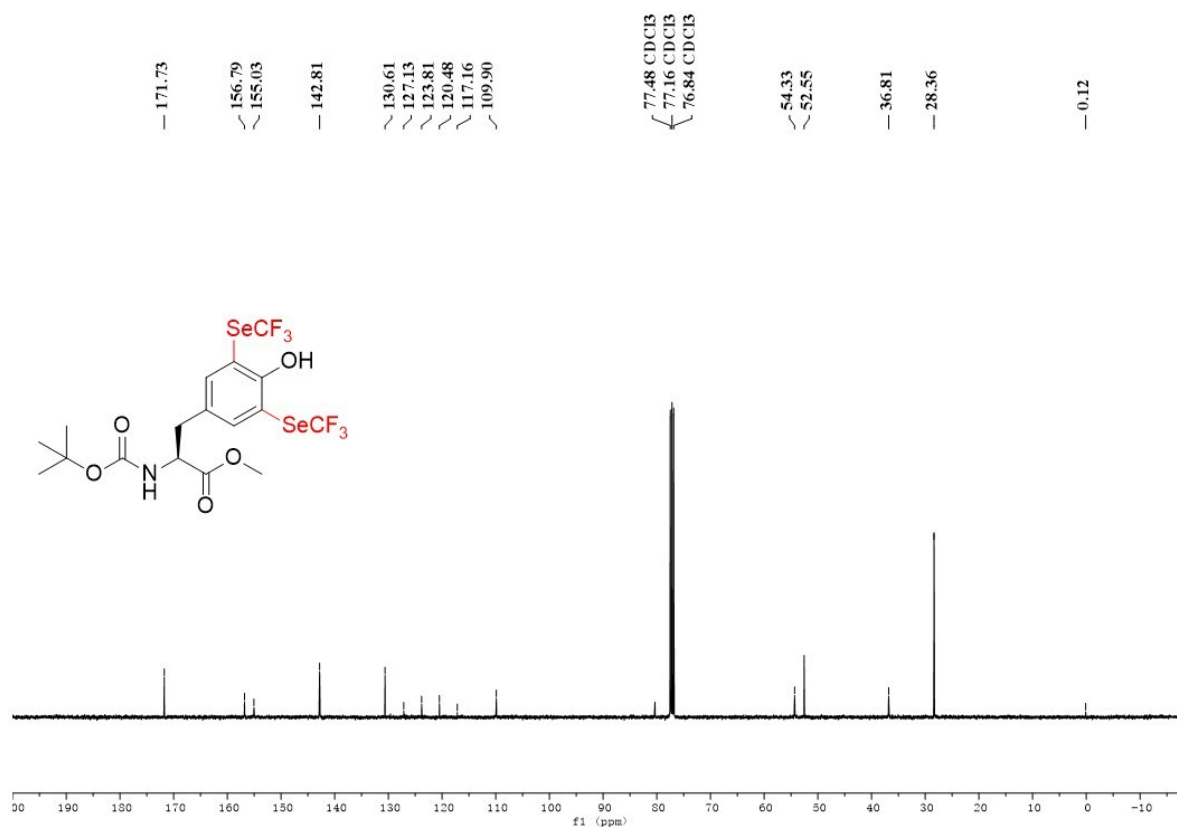

**5bd** (6,6'-bis((trifluoromethyl)selenanyl)-[1,1'-binaphthalene]-2,2'-diol)

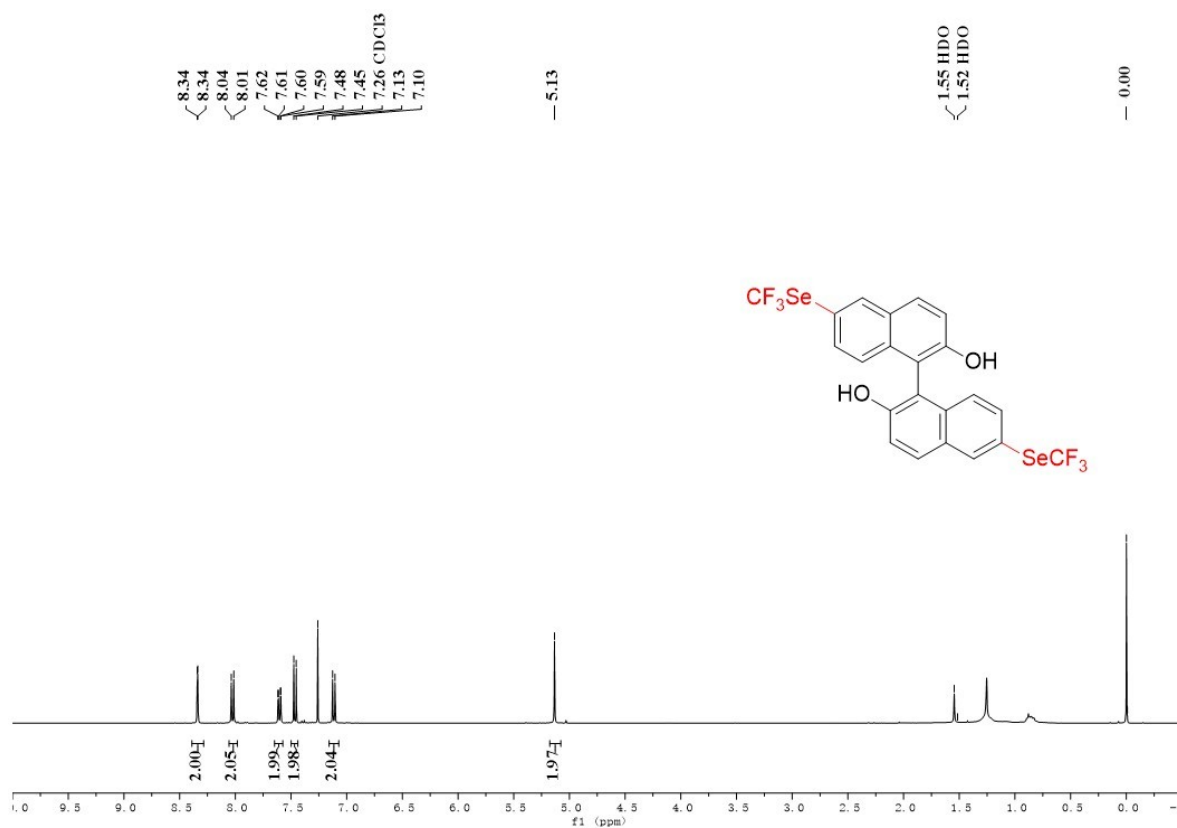

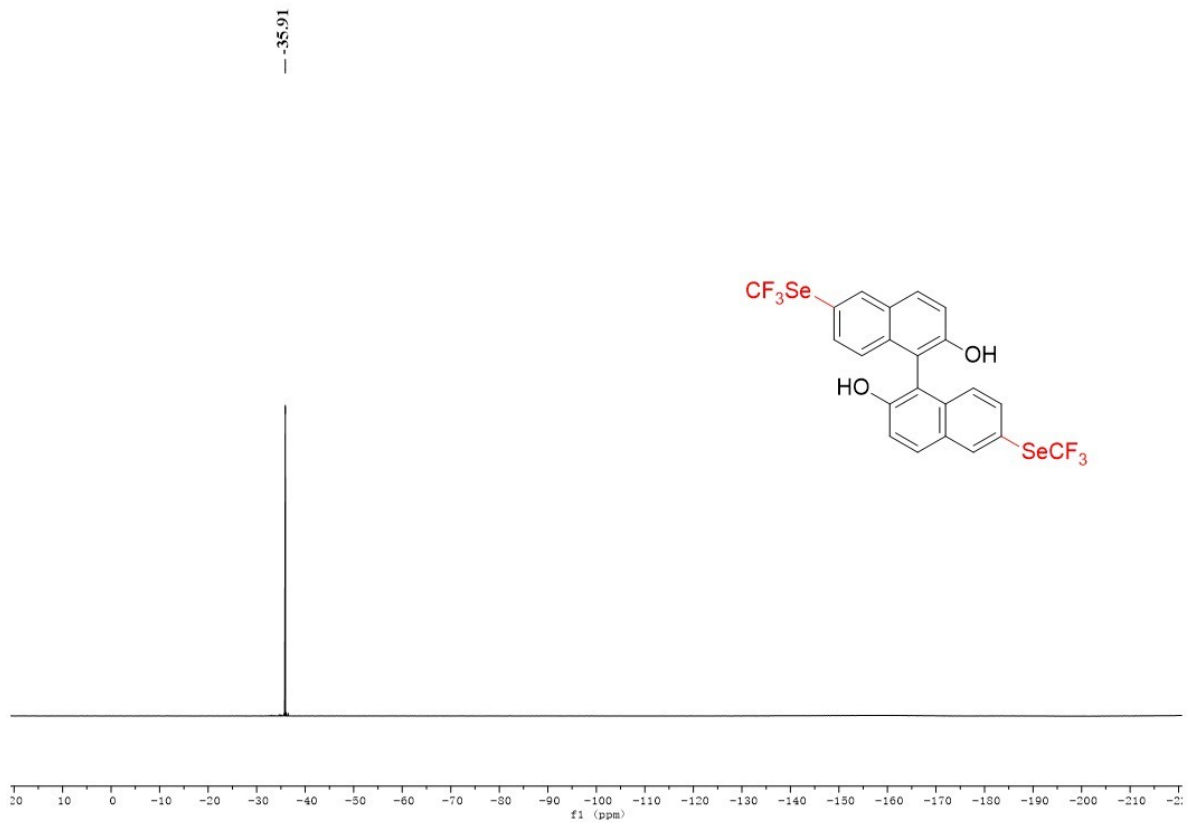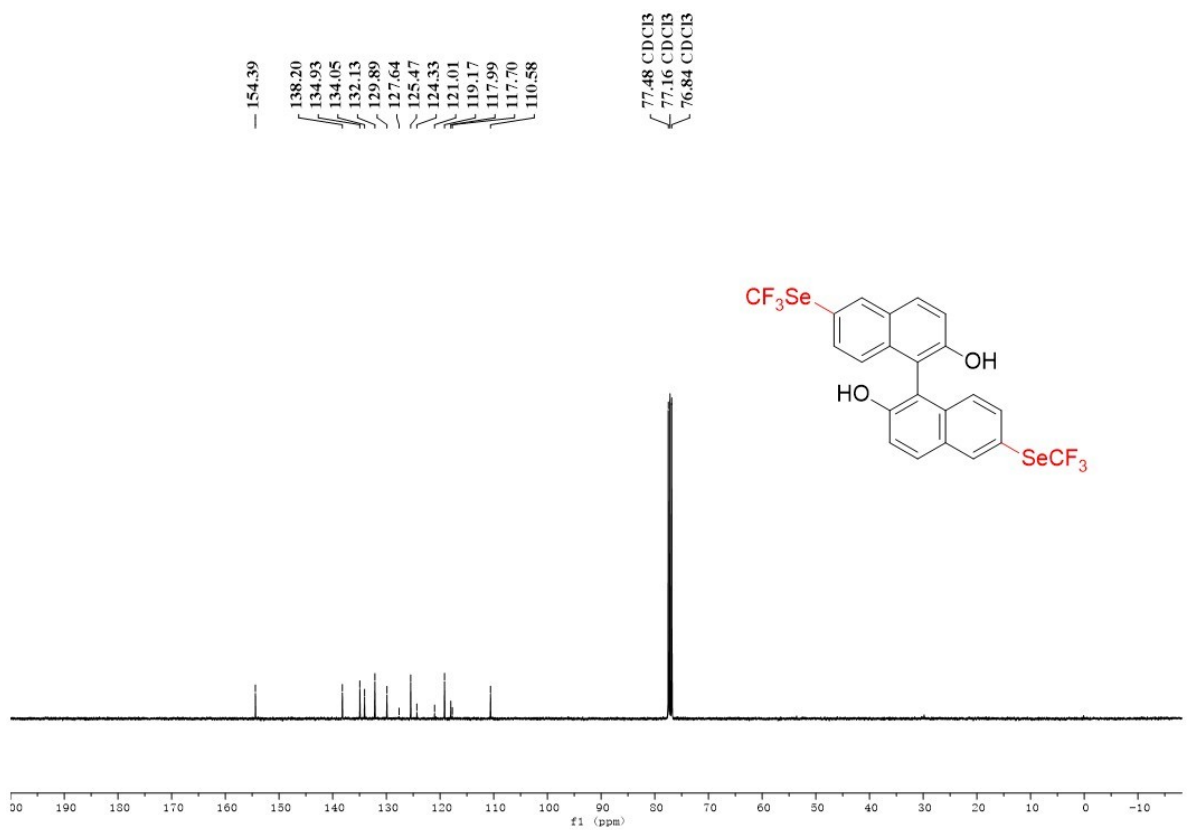

**5be** (5-methyl-4,6-bis((trifluoromethyl)selanyl)benzene-1,3-diol)

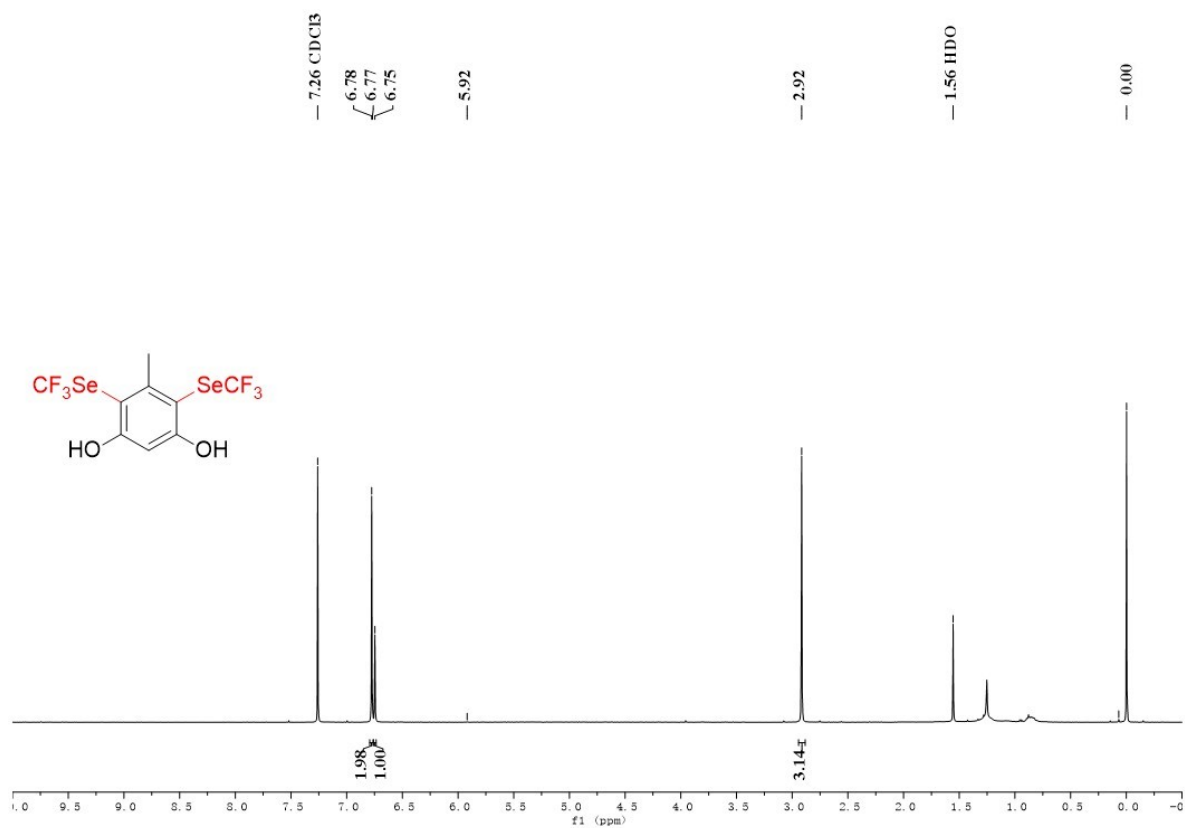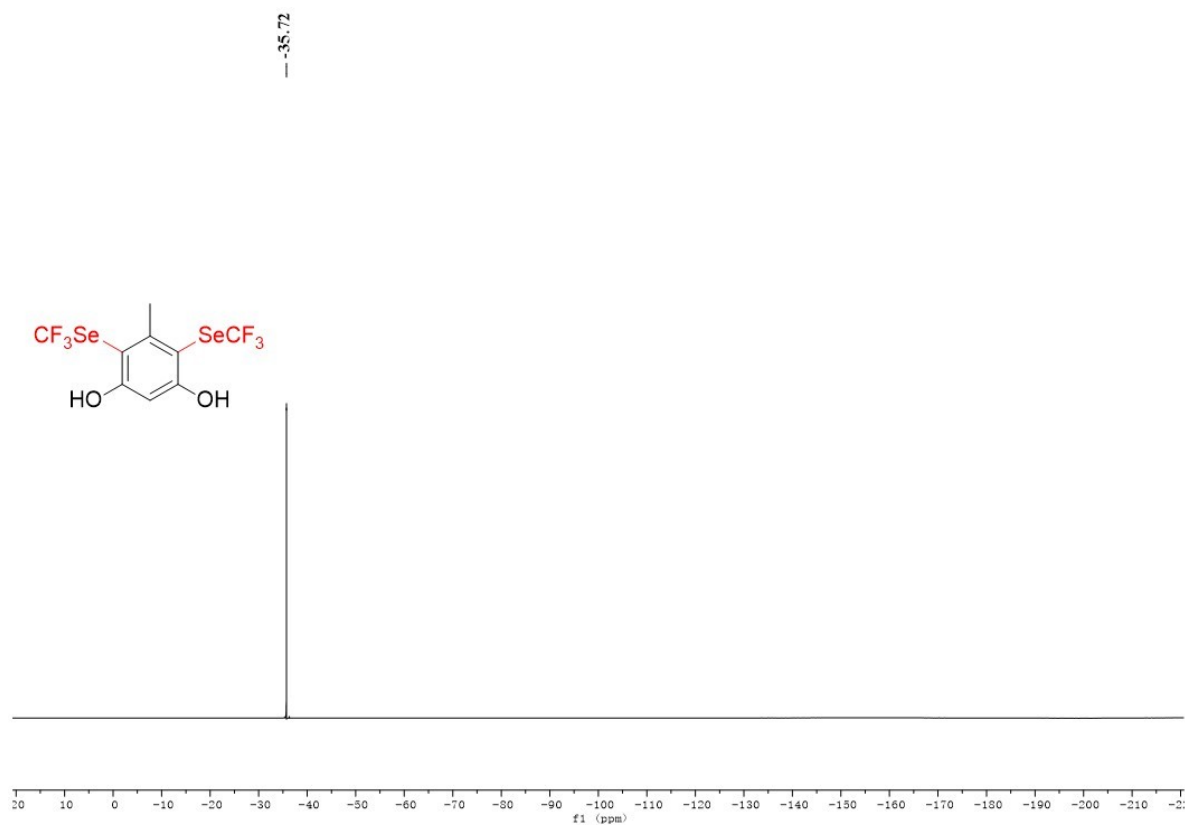



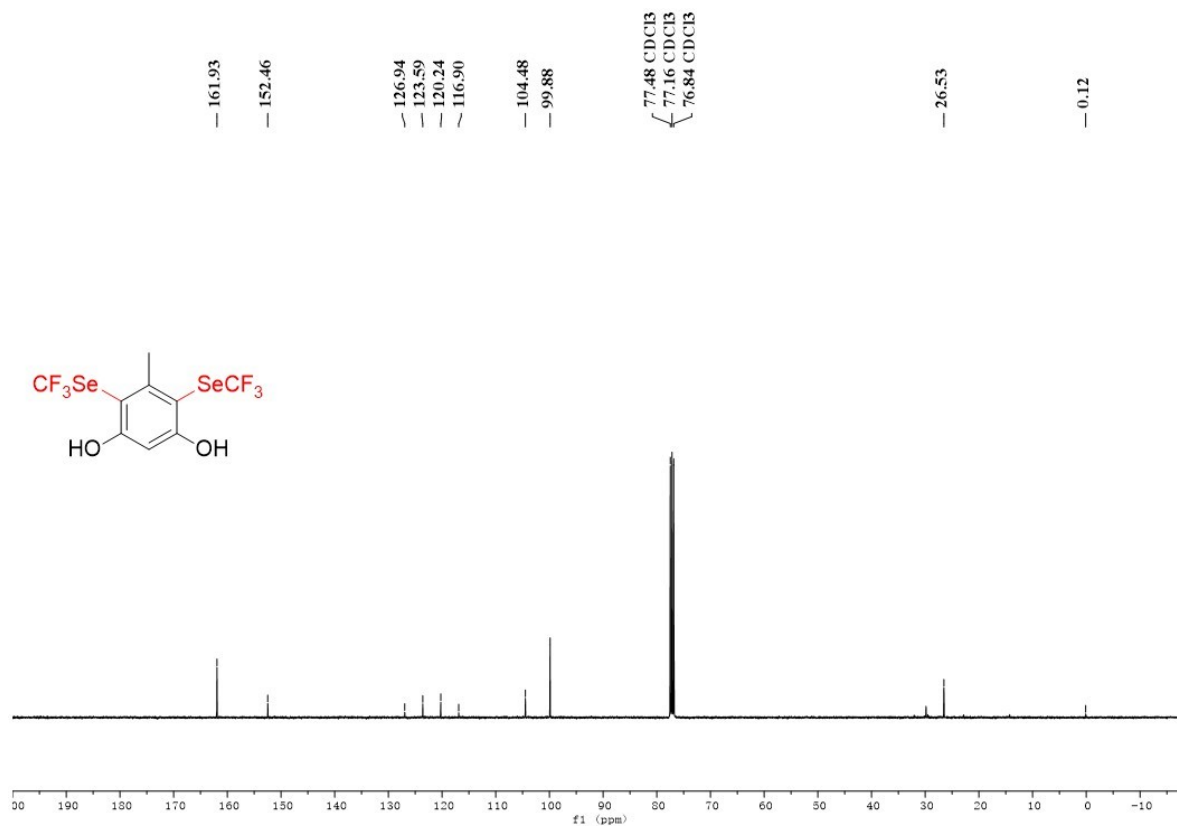

**5bf** (5-methyl-2,4,6-tris((trifluoromethyl)selenanyl)benzene-1,3-diol)

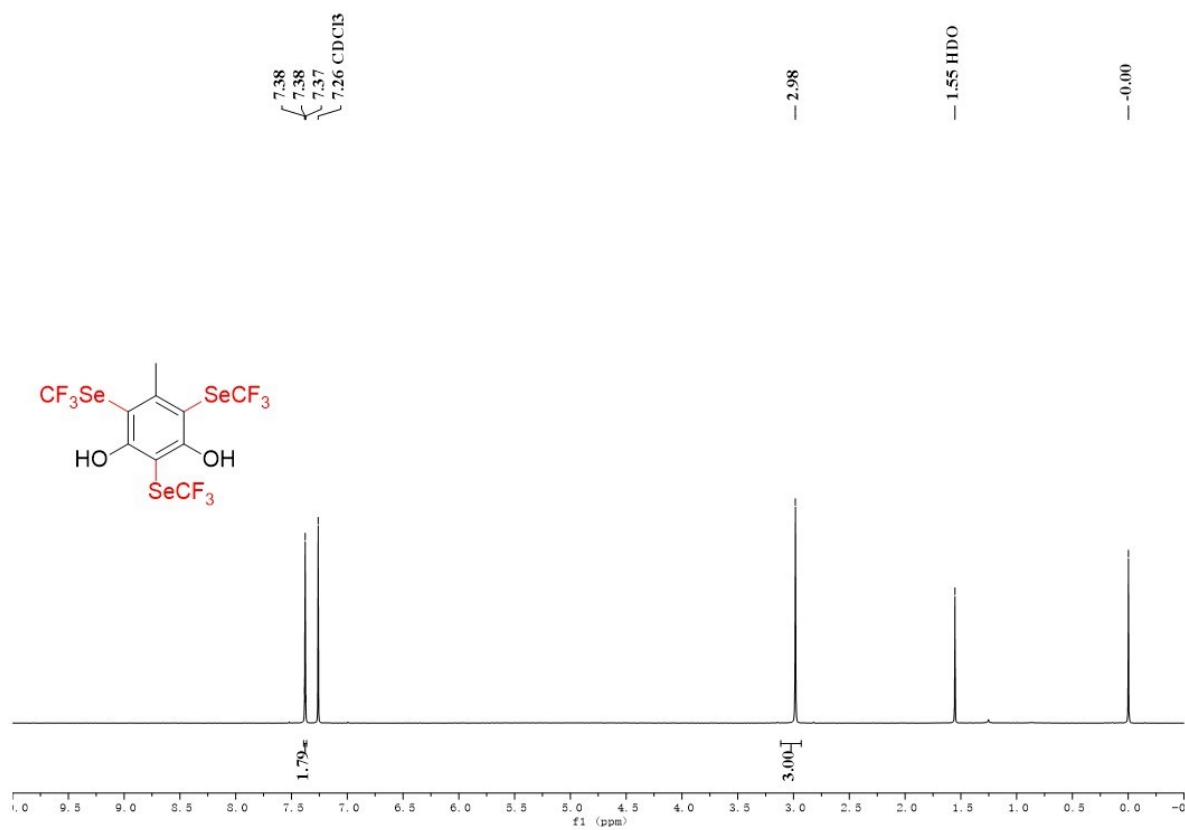

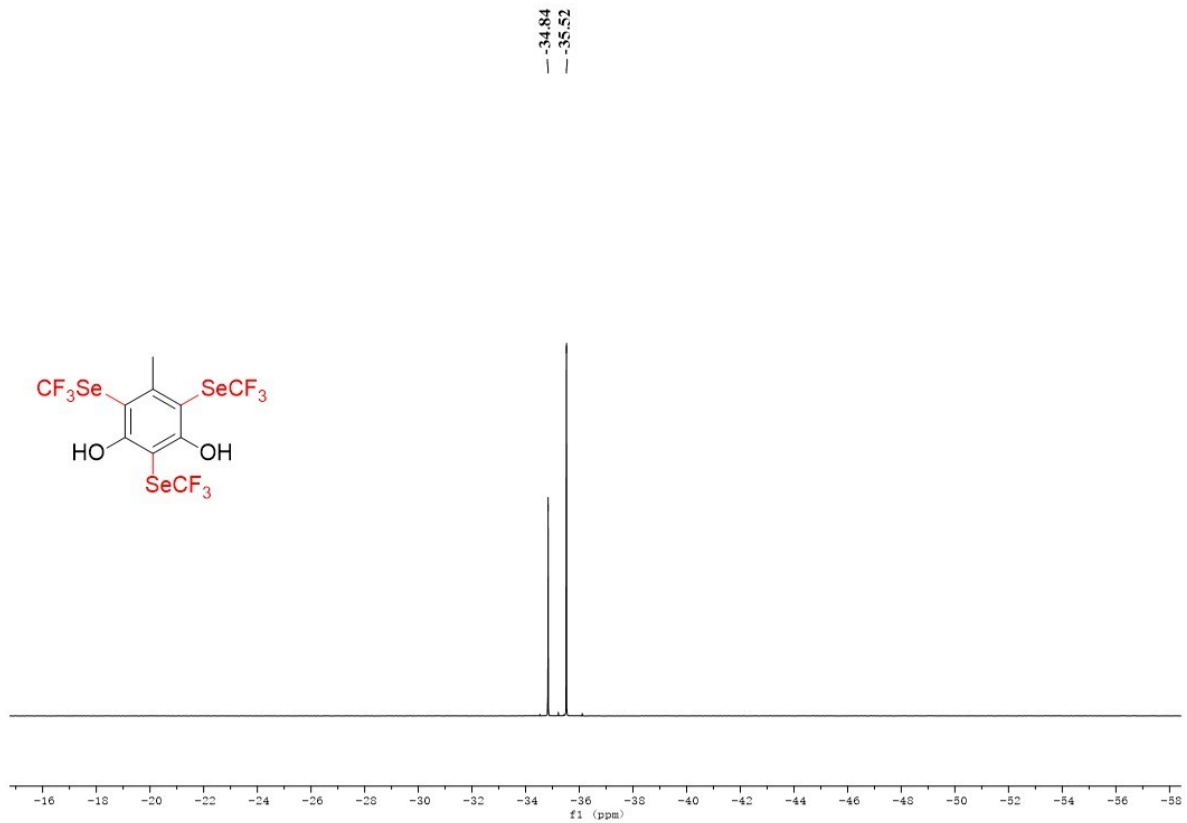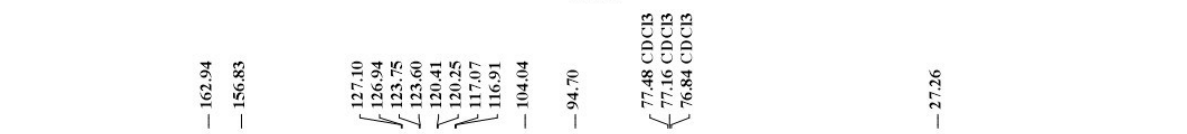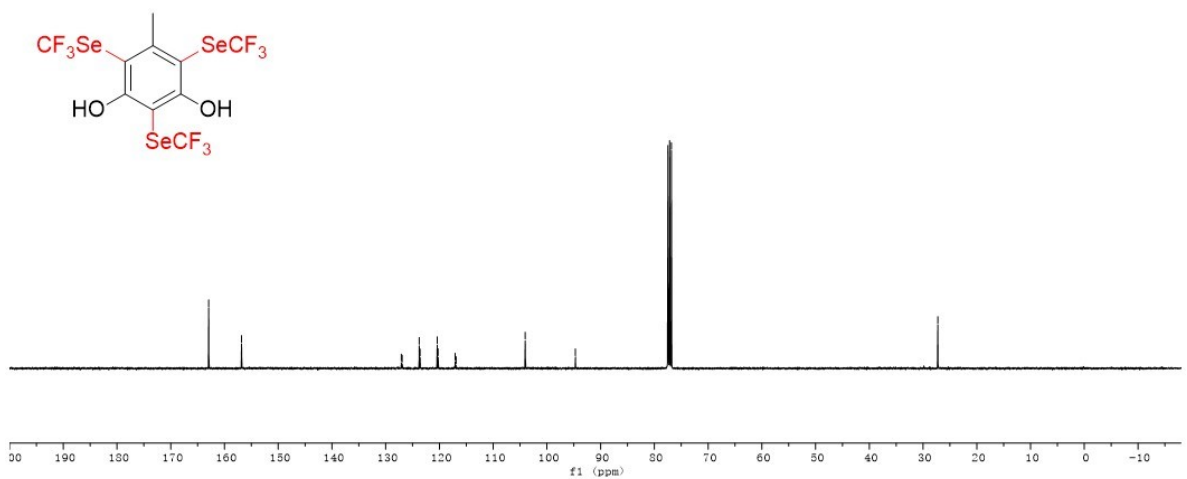

**5bg** (2,4-bis((trifluoromethyl)selanyl)naphthalen-1-amine)

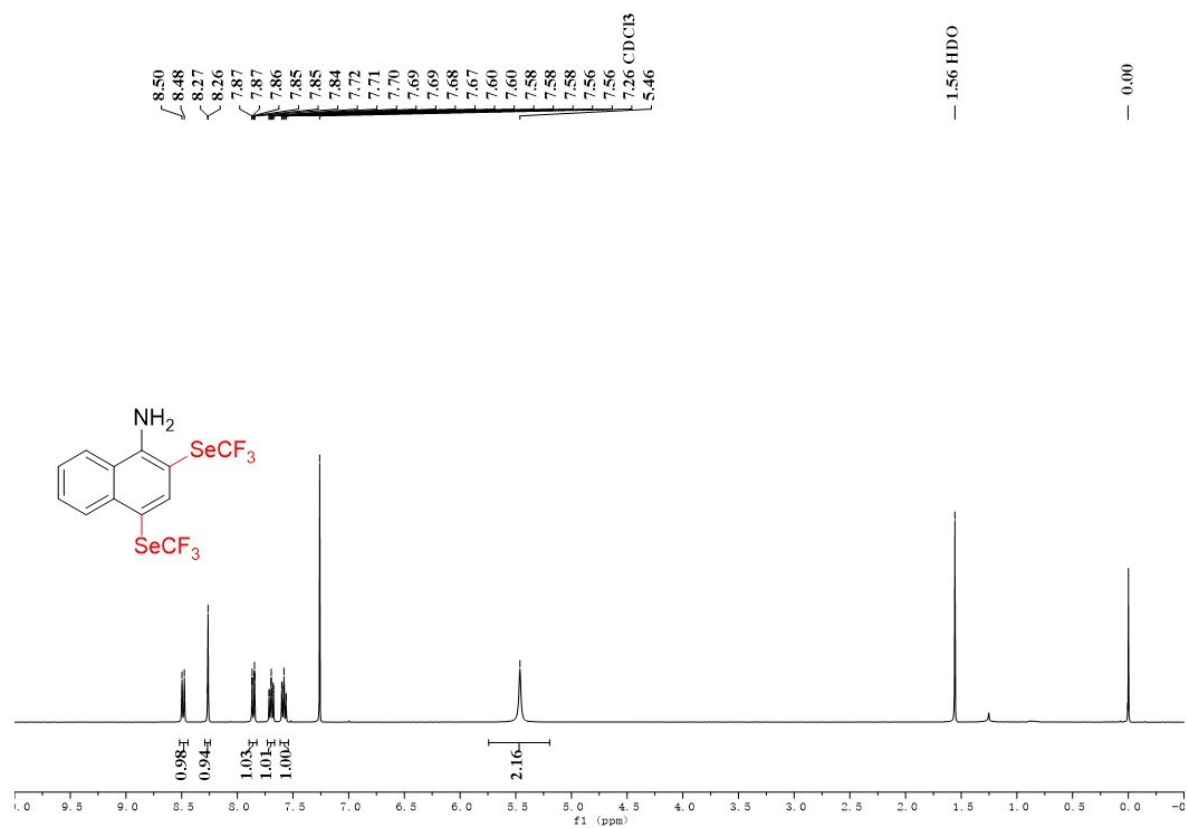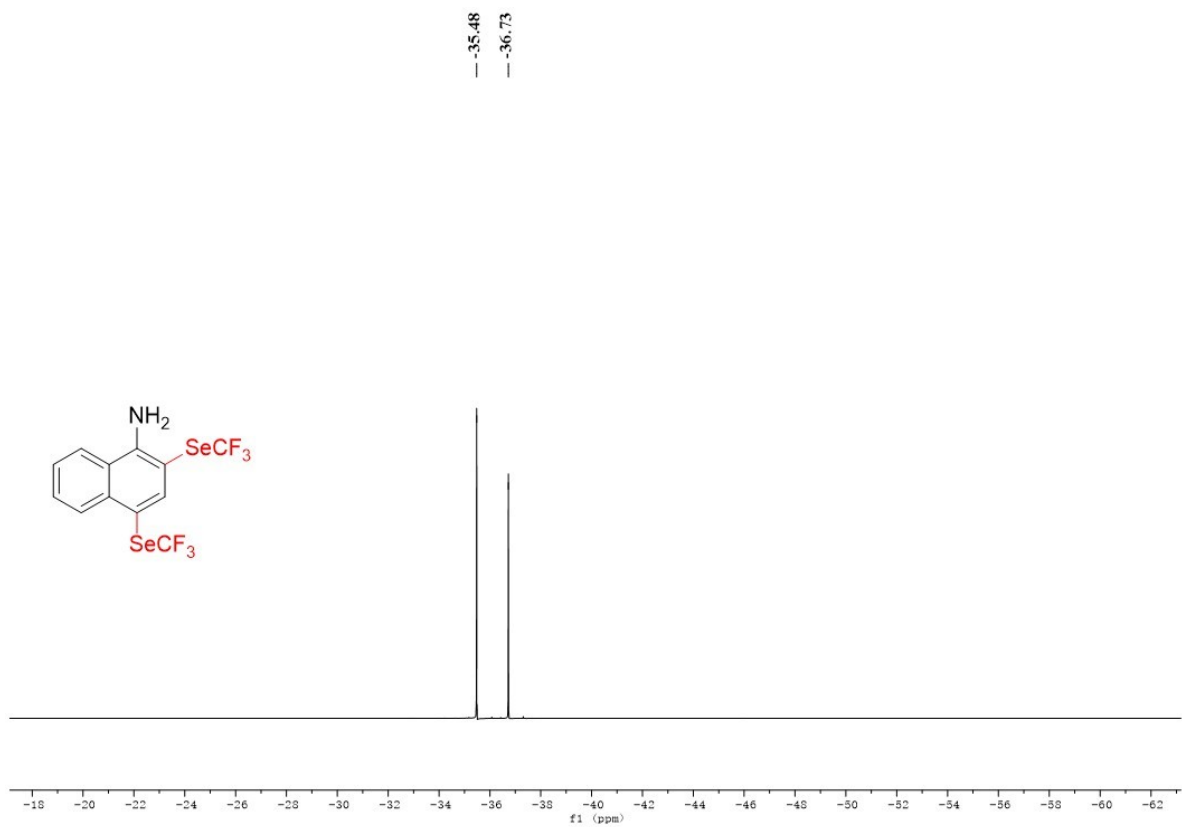

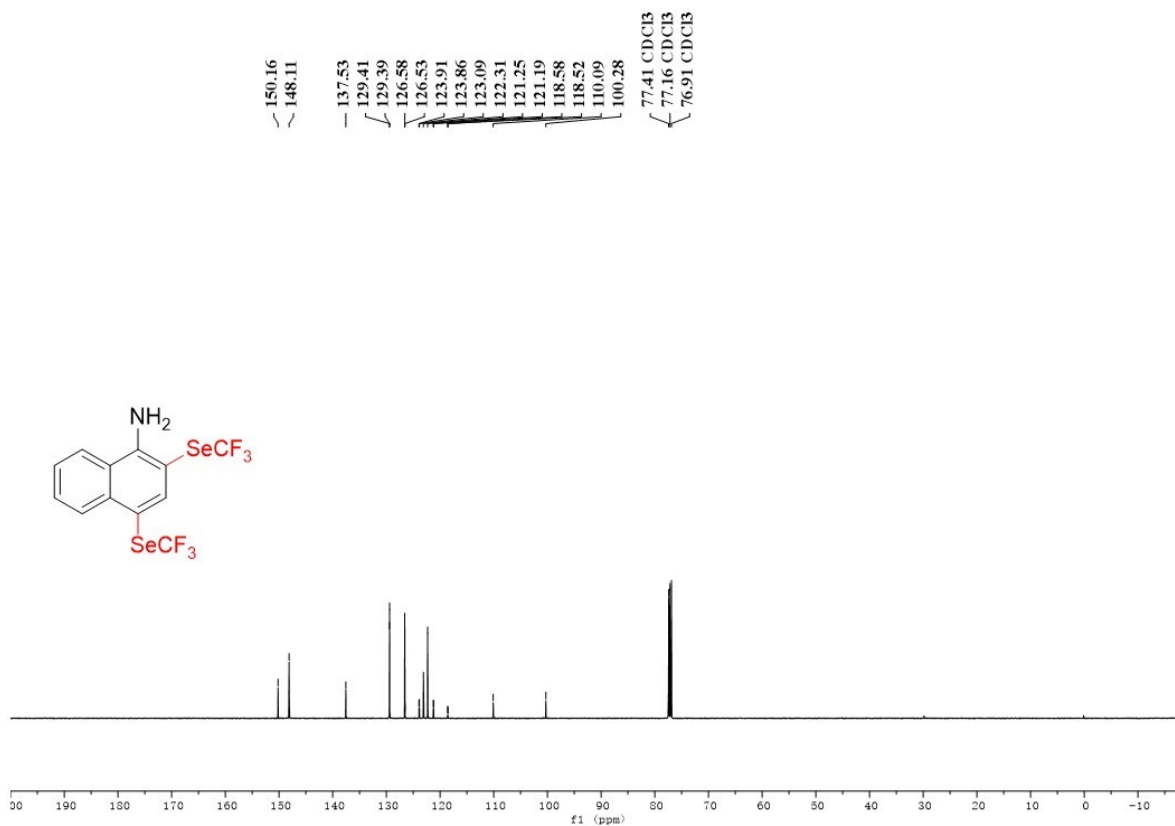

**5bh** (N,N-dimethyl-2,4-bis((trifluoromethyl)selenyl)aniline)

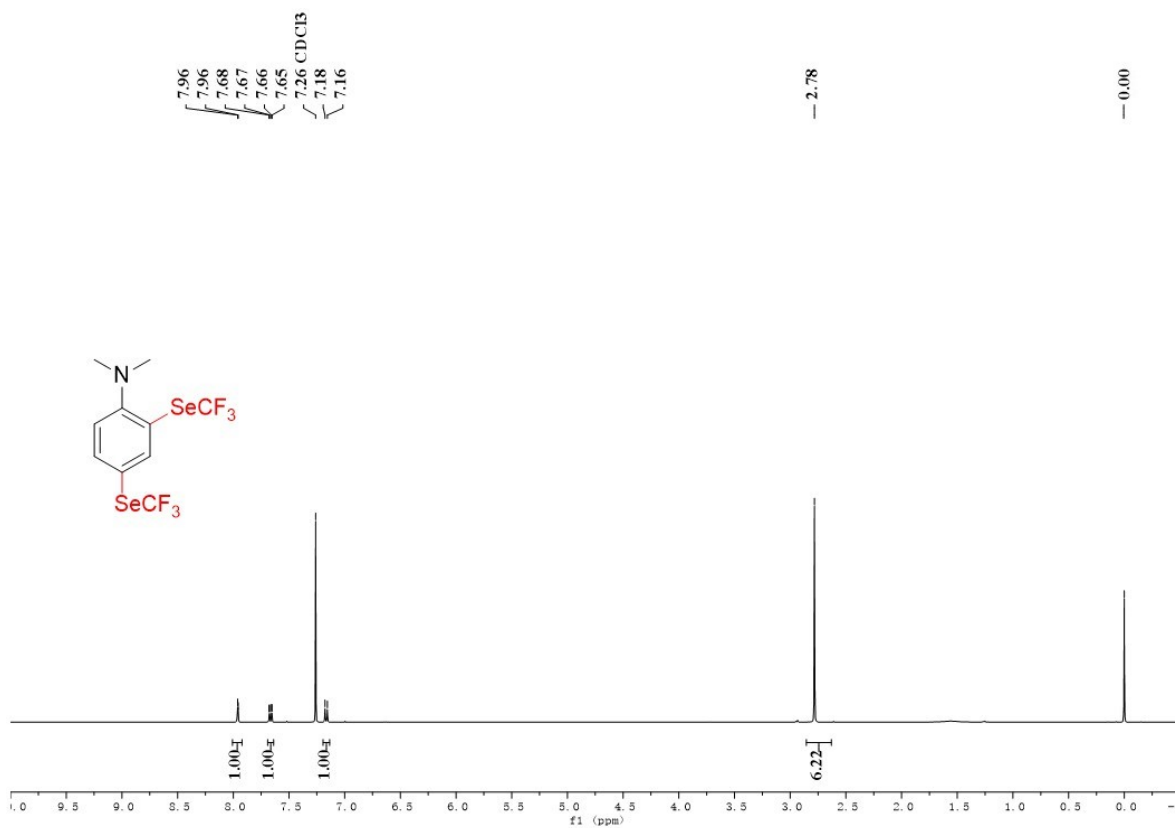

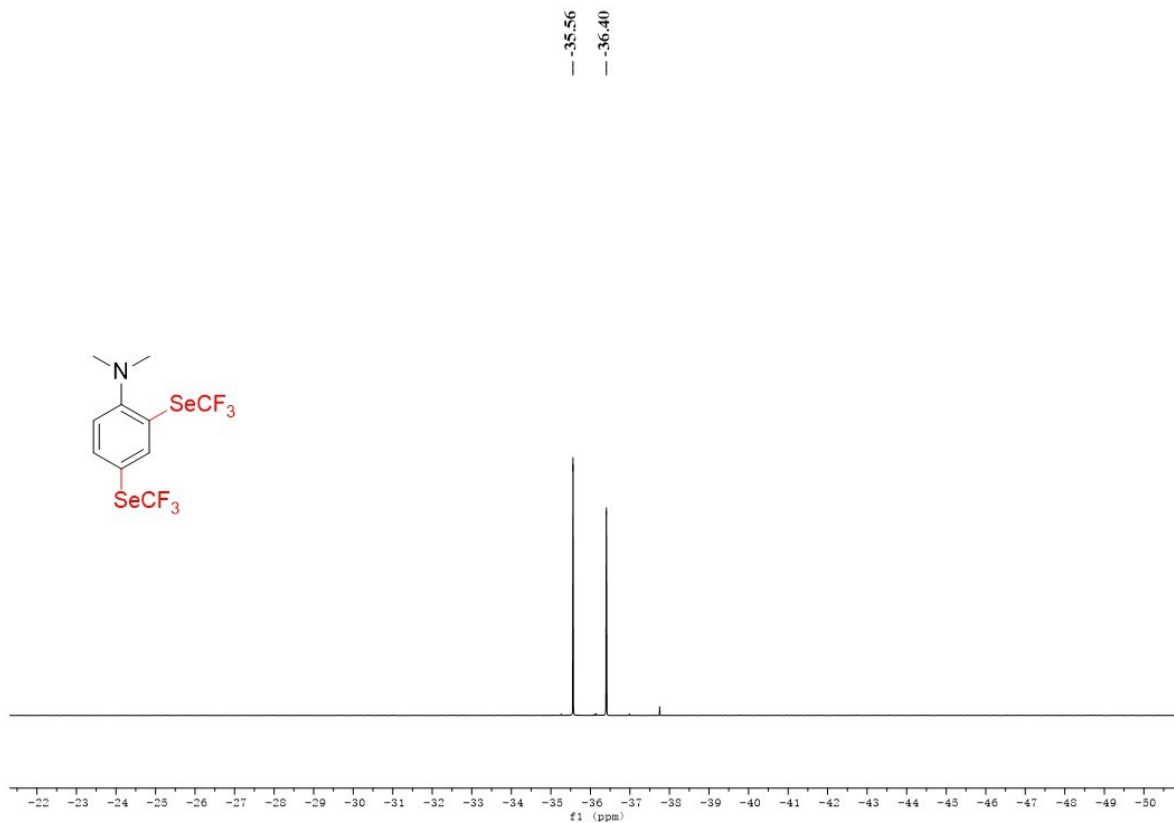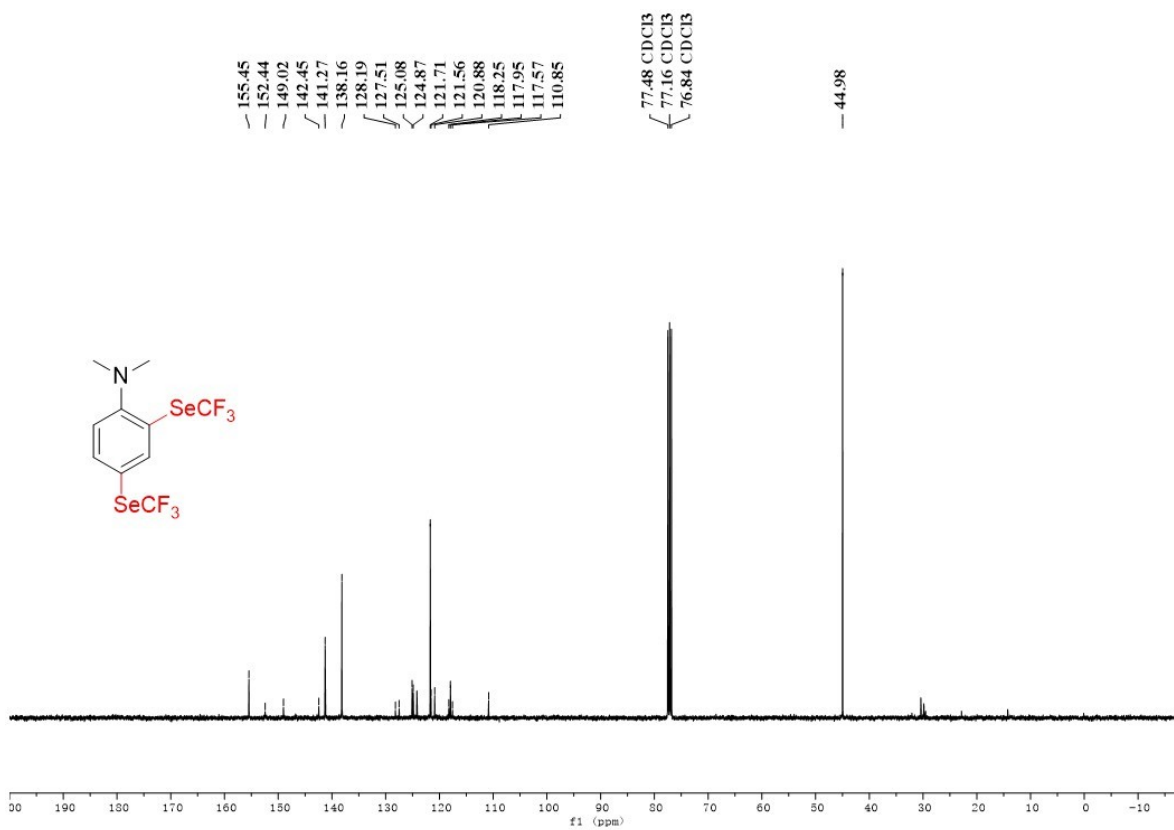

**5bi** (3,6-bis((trifluoromethyl)selanyl)-9H-carbazole)

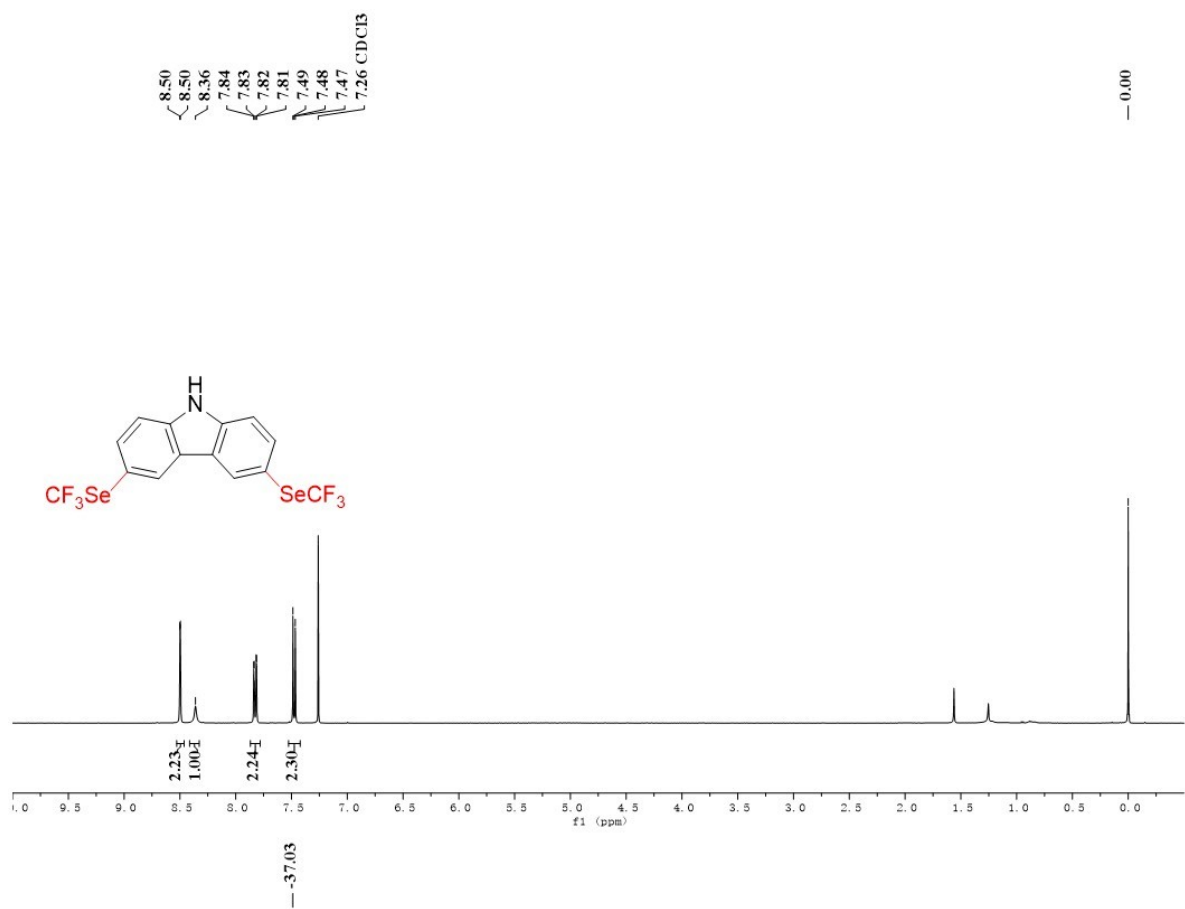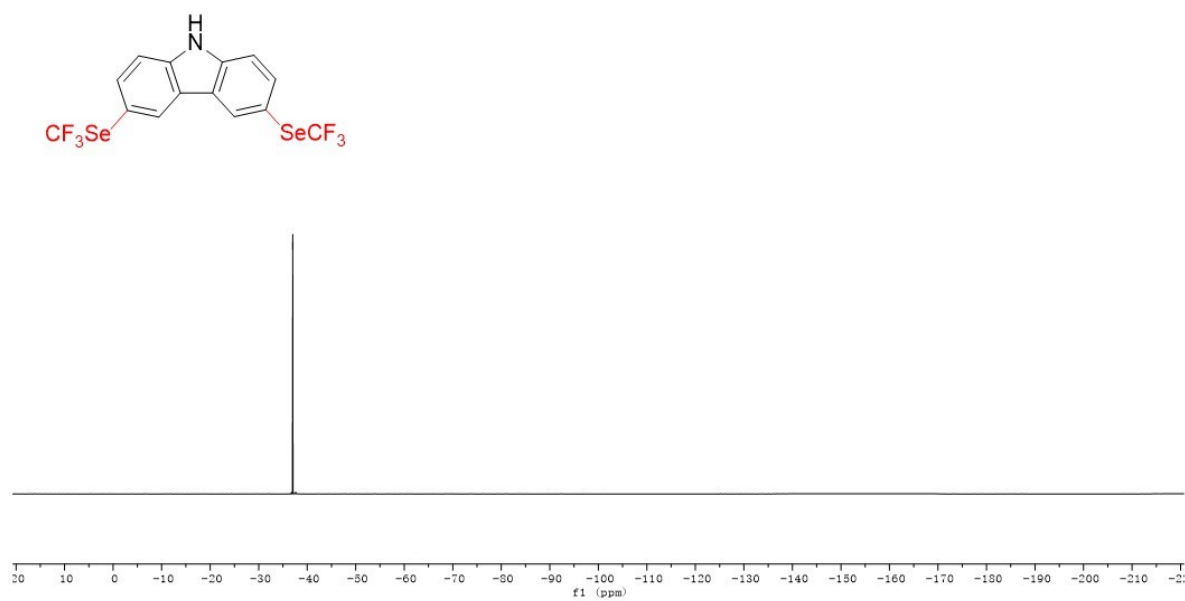

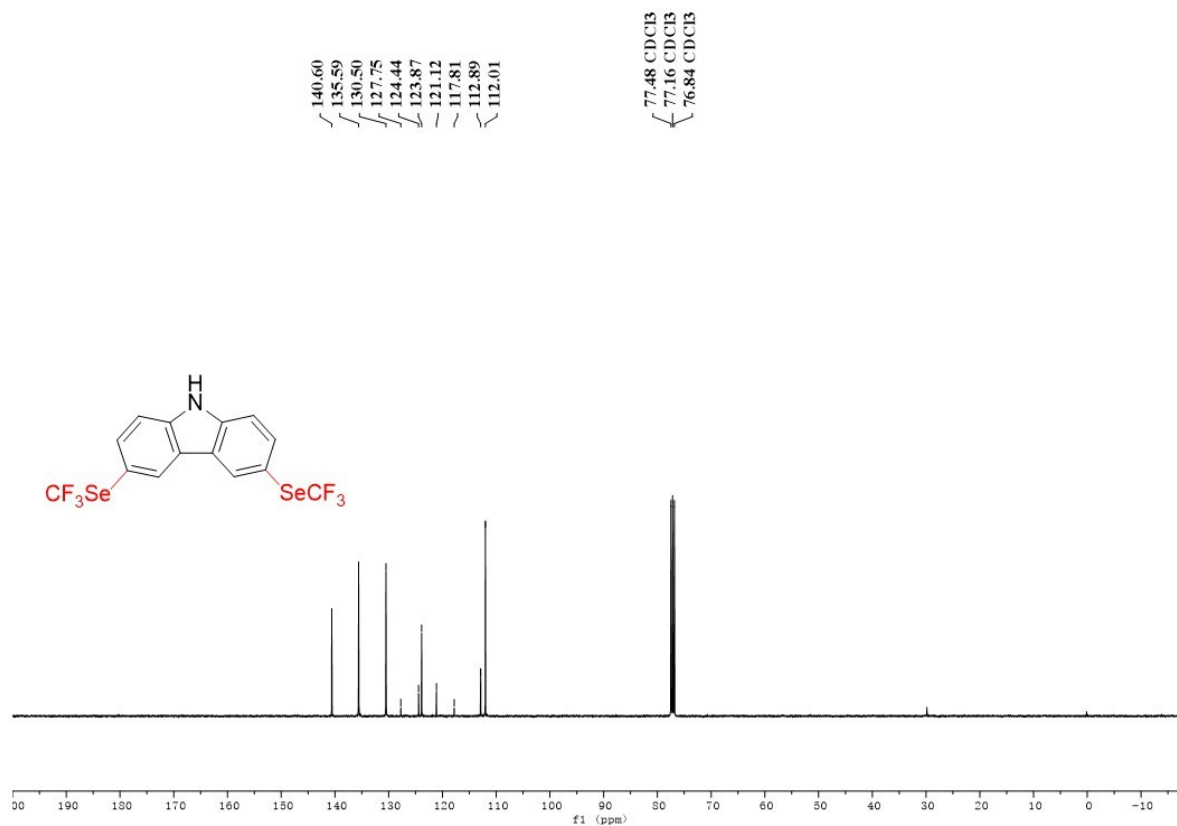

**5bj** (N-(2,4-bis((trifluoromethyl)selanyl)phenyl)benzamide)

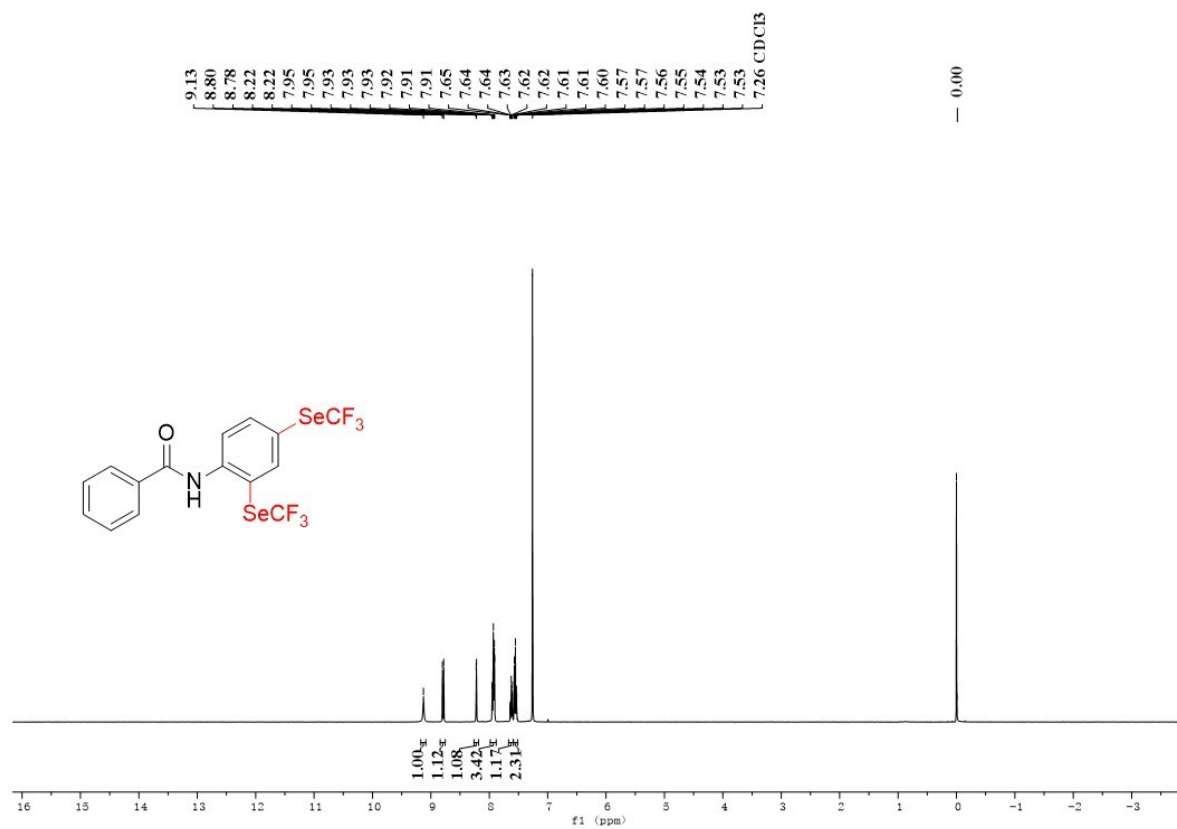

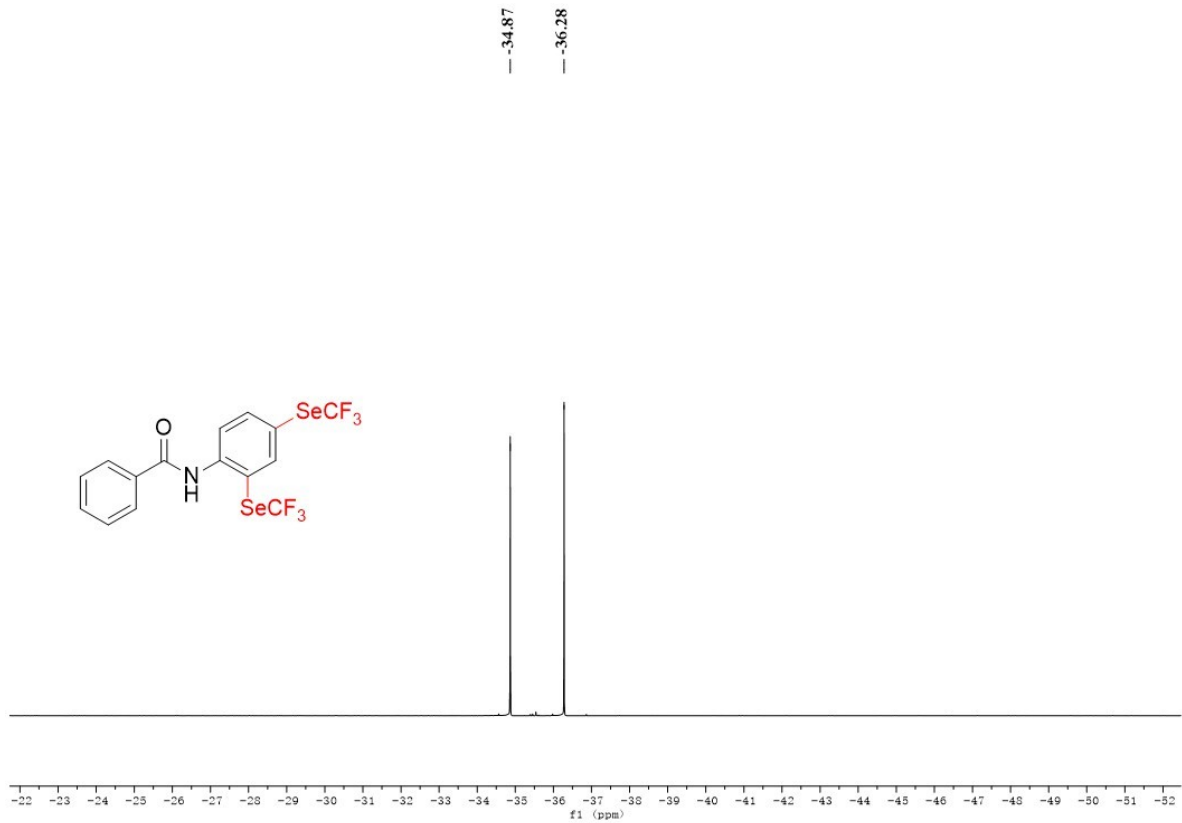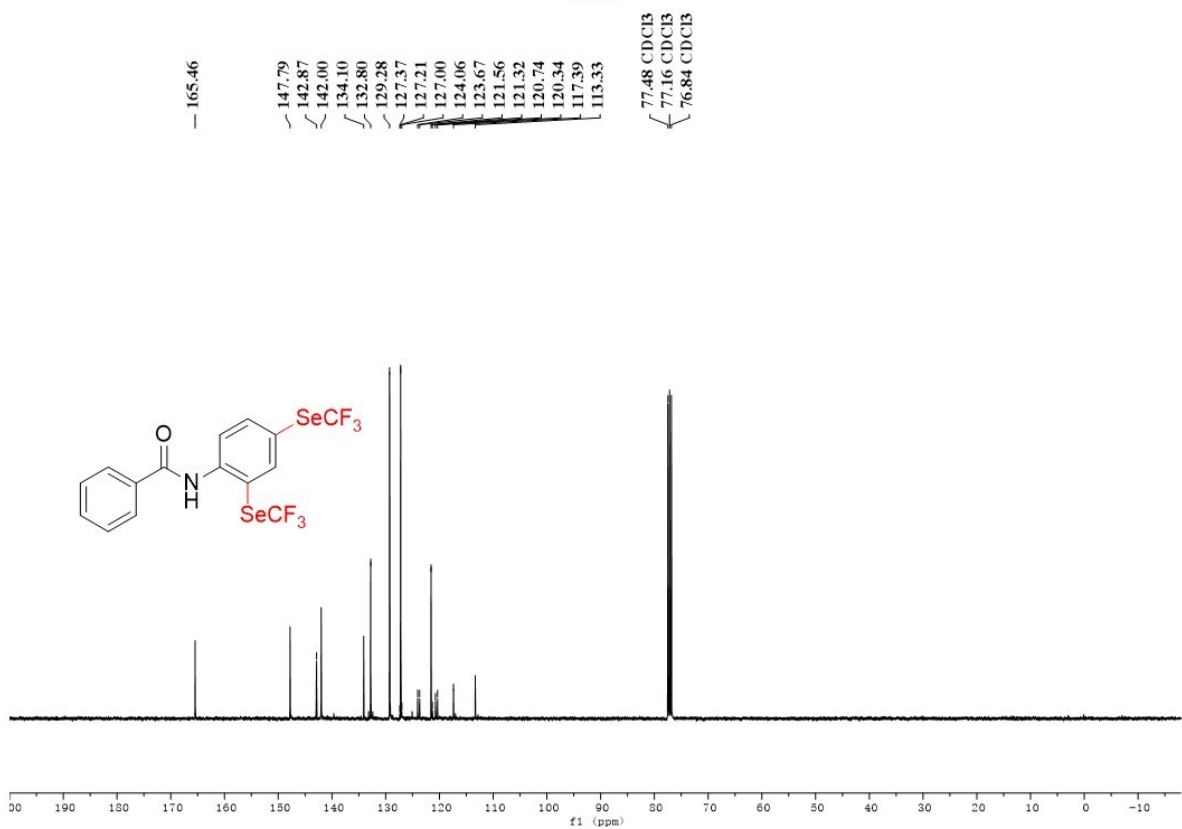



**5ca** ([A]: (8R,9S,13S,14S,17S)-13-methyl-2-((trifluoromethyl)selenanyl)-7,8,9,11,12,13,14,15,16,17-decahydro-6H-cyclopenta[a]phenanthrene-3,17-diol; [B]: (8R,9S,13S,14S,17S)-13-methyl-4-((trifluoromethyl)selenanyl)-7,8,9,11,12,13,14,15,16,17-decahydro-6H-cyclopenta[a]phenanthrene-3,17-diol)

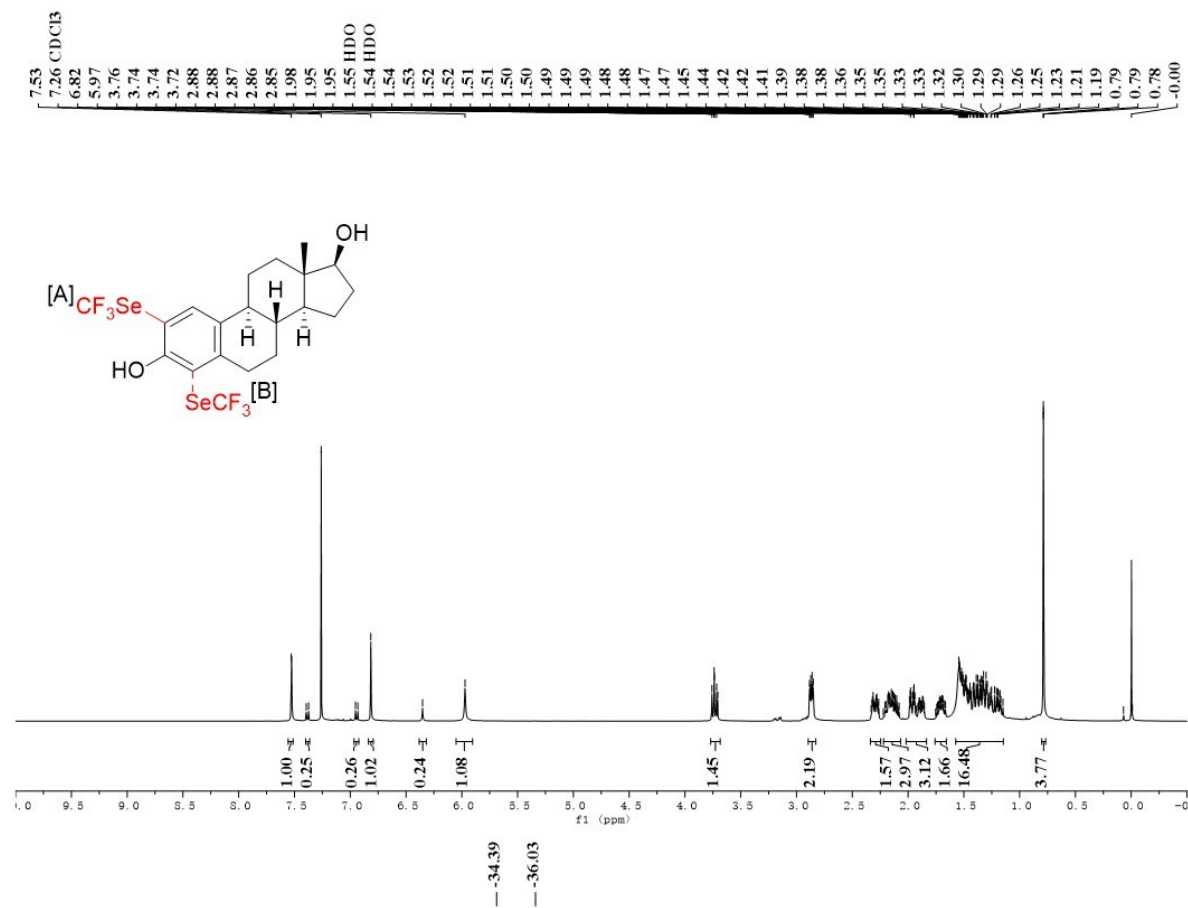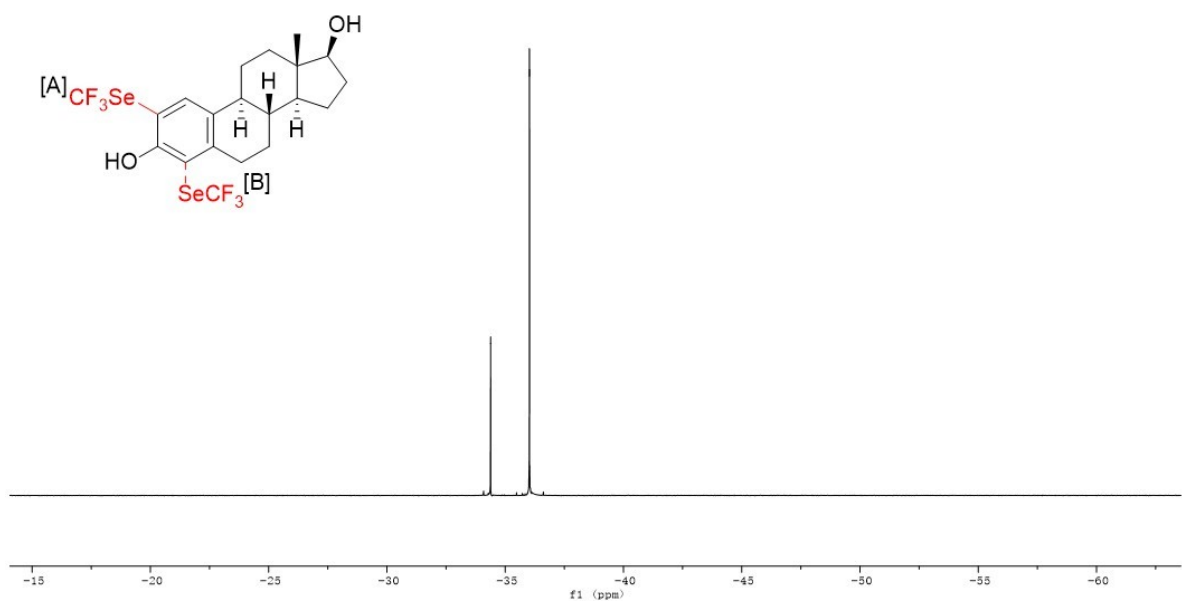

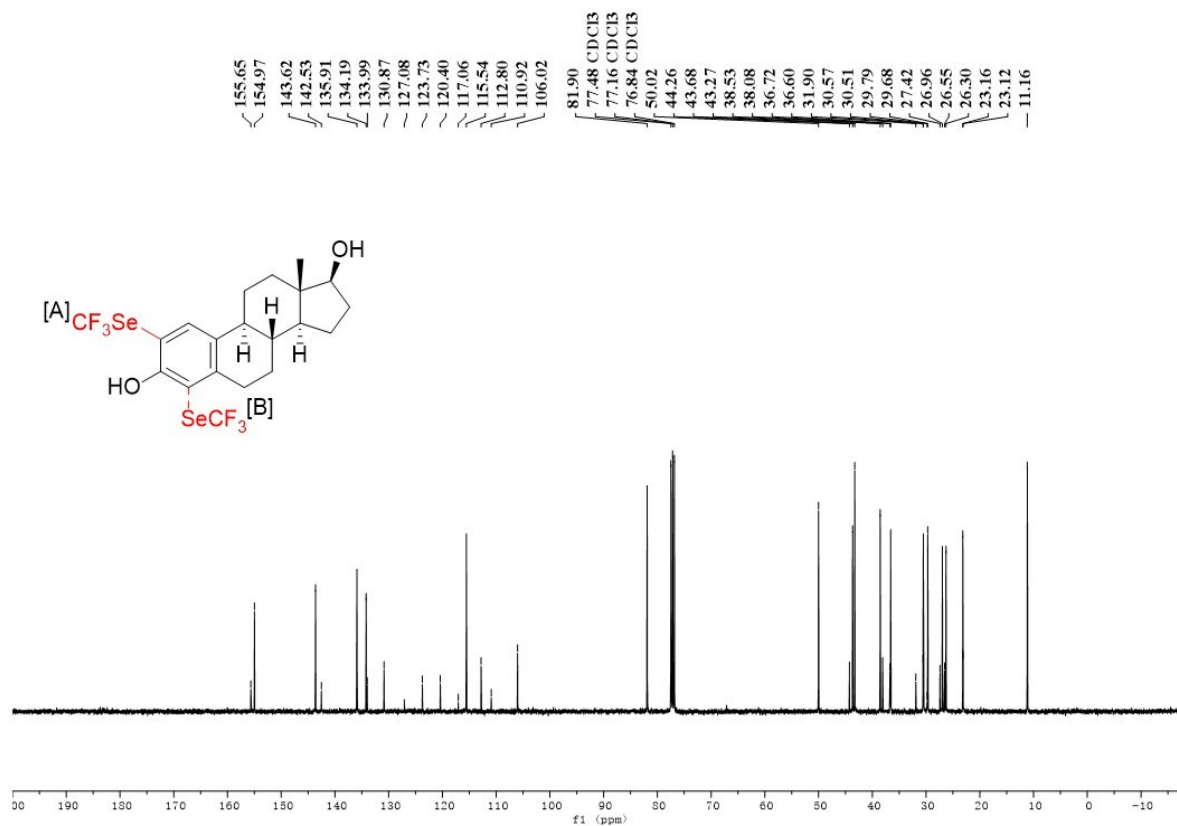

**5cb** ([A]: (7R,8R,9S,13S,14S,17S)-13-methyl-7-(9-((4,4,5,5,5-pentafluoropentyl)sulfinyl)nonyl)-2-((trifluoromethyl)selanyl)-7,8,9,11,12,13,14,15,16,17-decahydro-6H-cyclopenta[a]phenanthrene-3,17-diol; [B]: (7R,8R,9S,13S,14S,17S)-13-methyl-7-(9-((4,4,5,5,5-pentafluoropentyl)sulfinyl)nonyl)-4-((trifluoromethyl)selanyl)-7,8,9,11,12,13,14,15,16,17-decahydro-6H-cyclopenta[a]phenanthrene-3,17-diol)

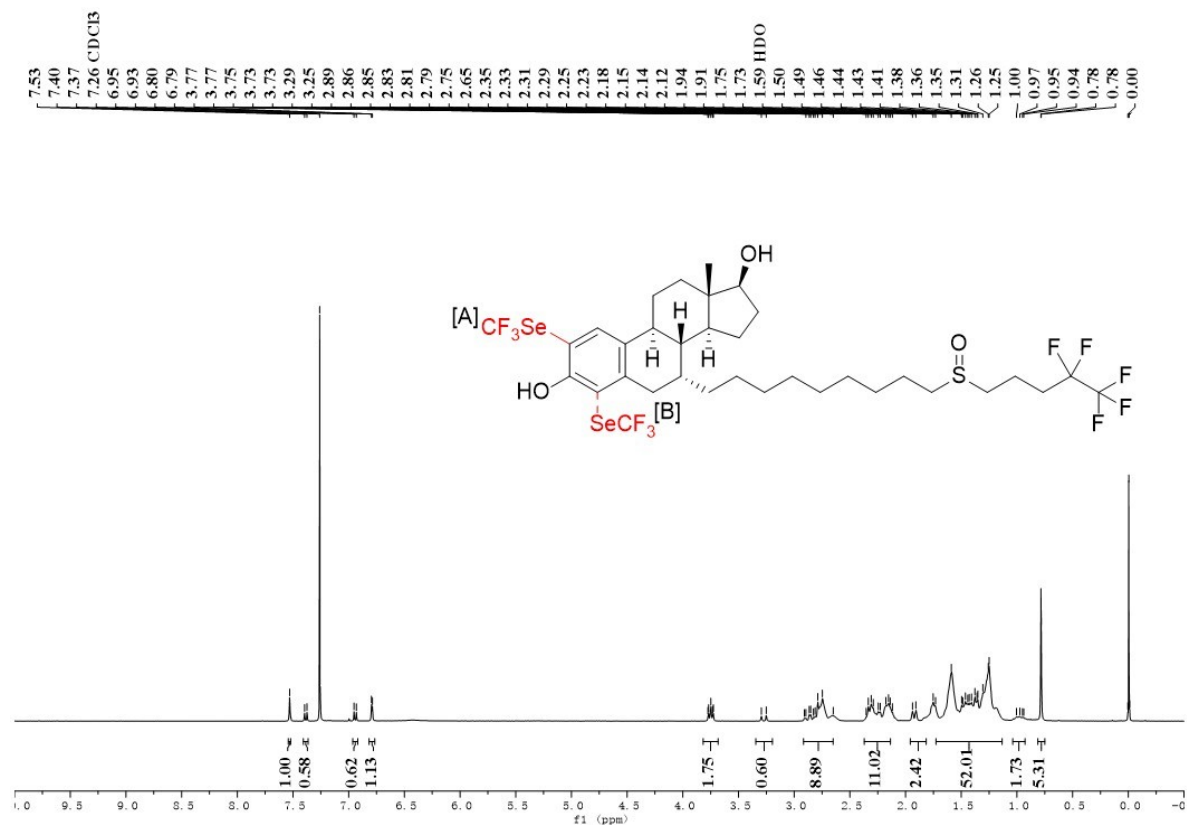

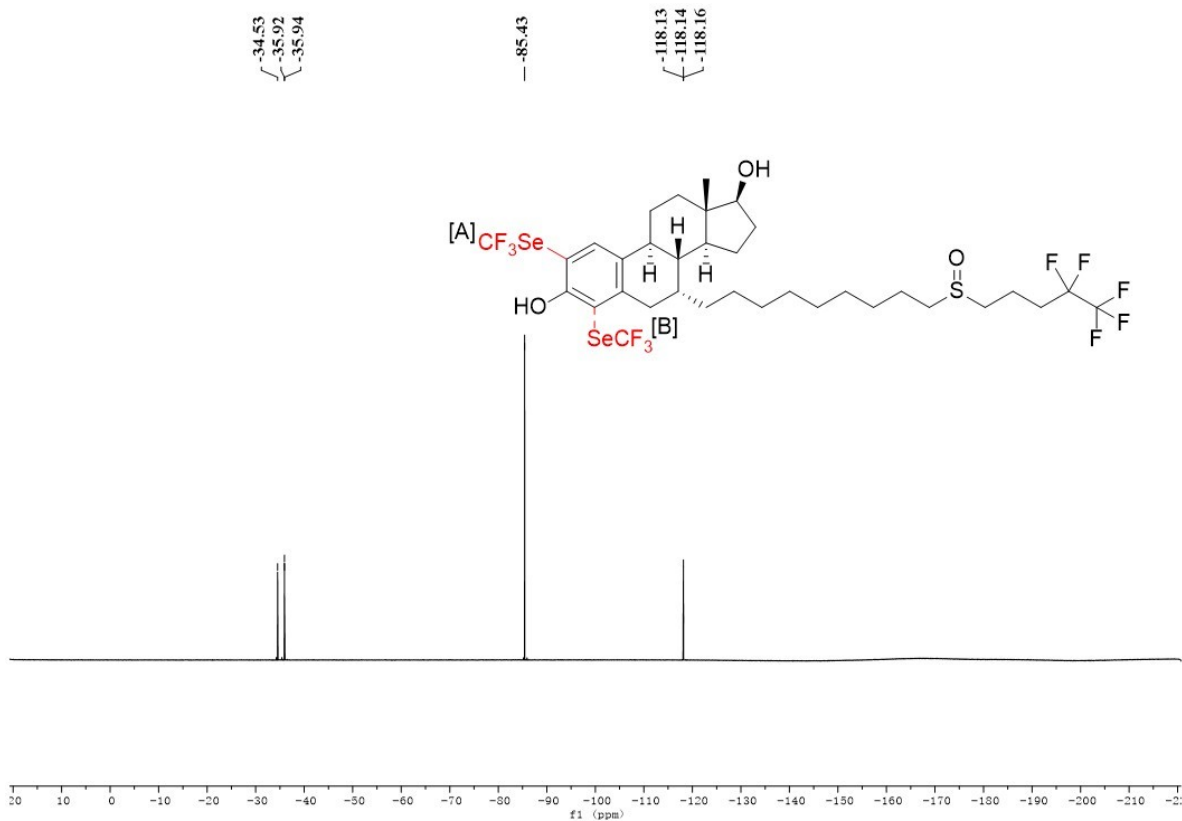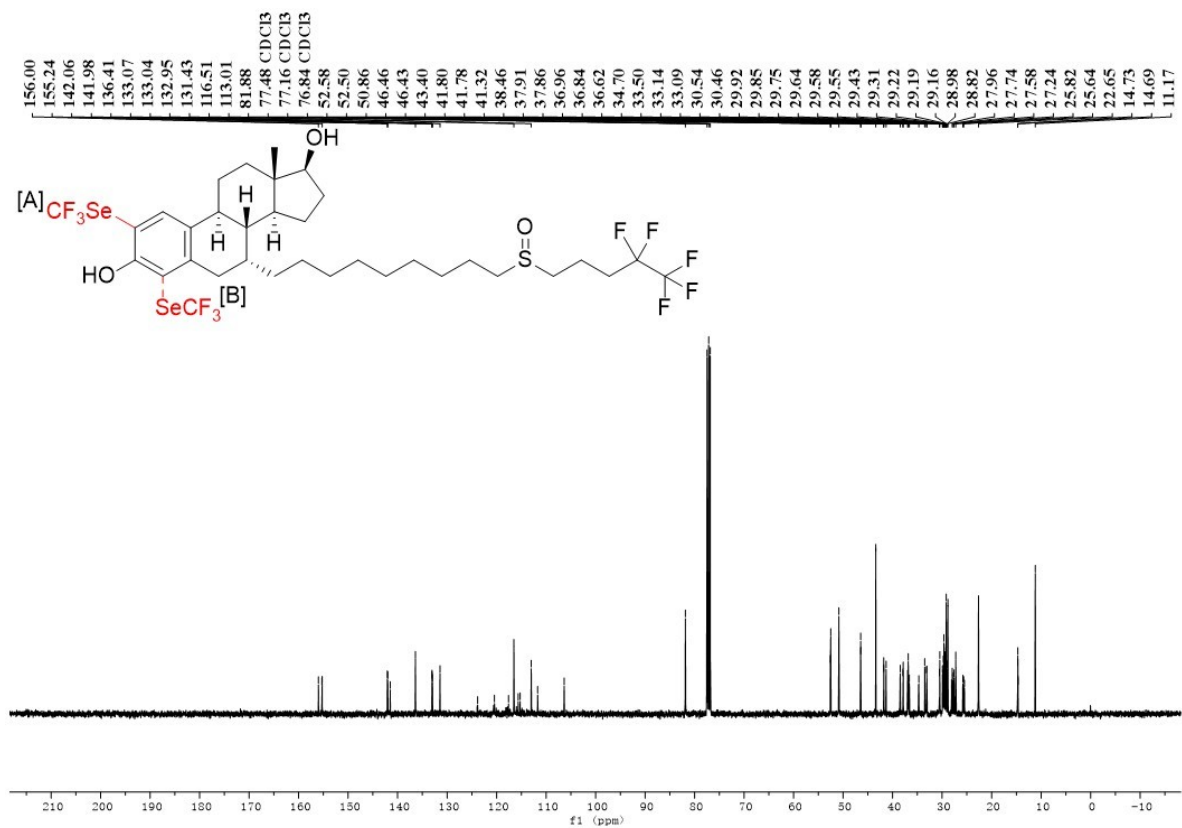

**5cc** (1-(4-fluorophenyl)-3-(3-(4-fluorophenyl)-3-(2,2,2-trifluoroethoxy)propyl)-4-(4-hydroxy-3-((trifluoromethyl)selenanyl)phenyl)azetid-2-one)

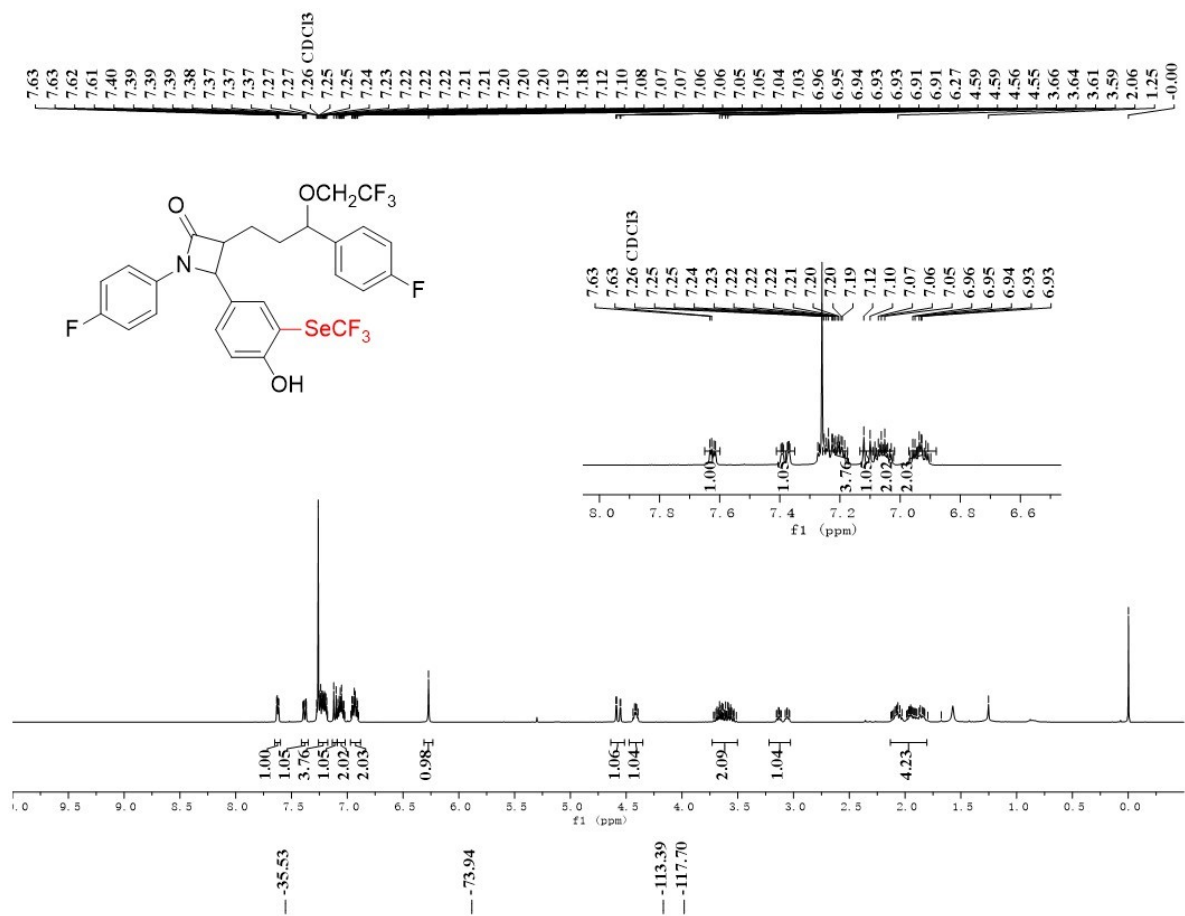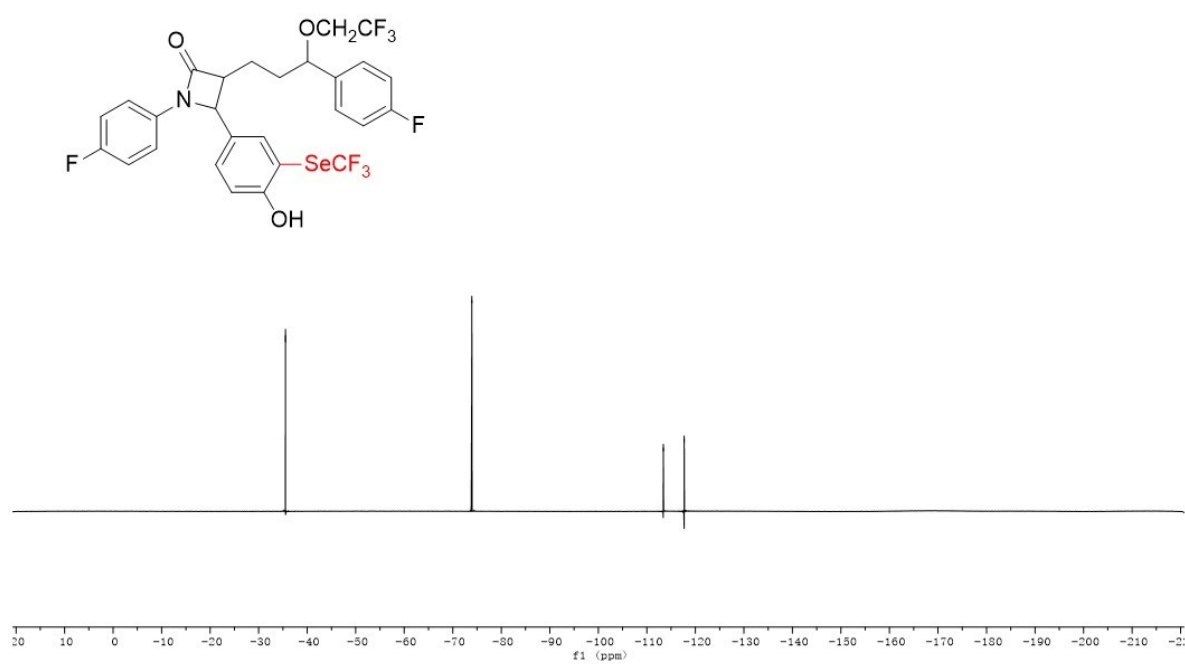

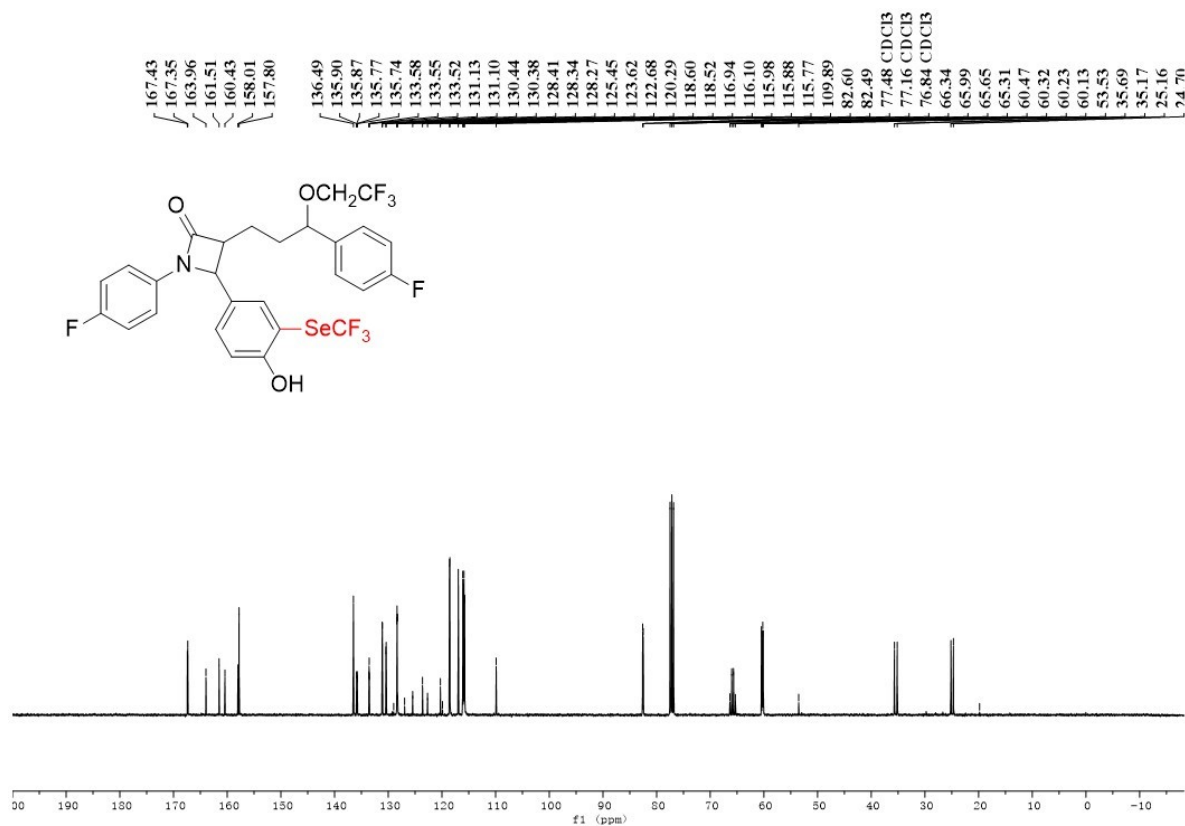

**5cd** ((S)-4-ethyl-4,9-dihydroxy-10-((trifluoromethyl)selanyl)-1,12-dihydro-14H-pyrano[3',4':6,7]indolizino[1,2-b]quinoline-3,14(4H)-dione)

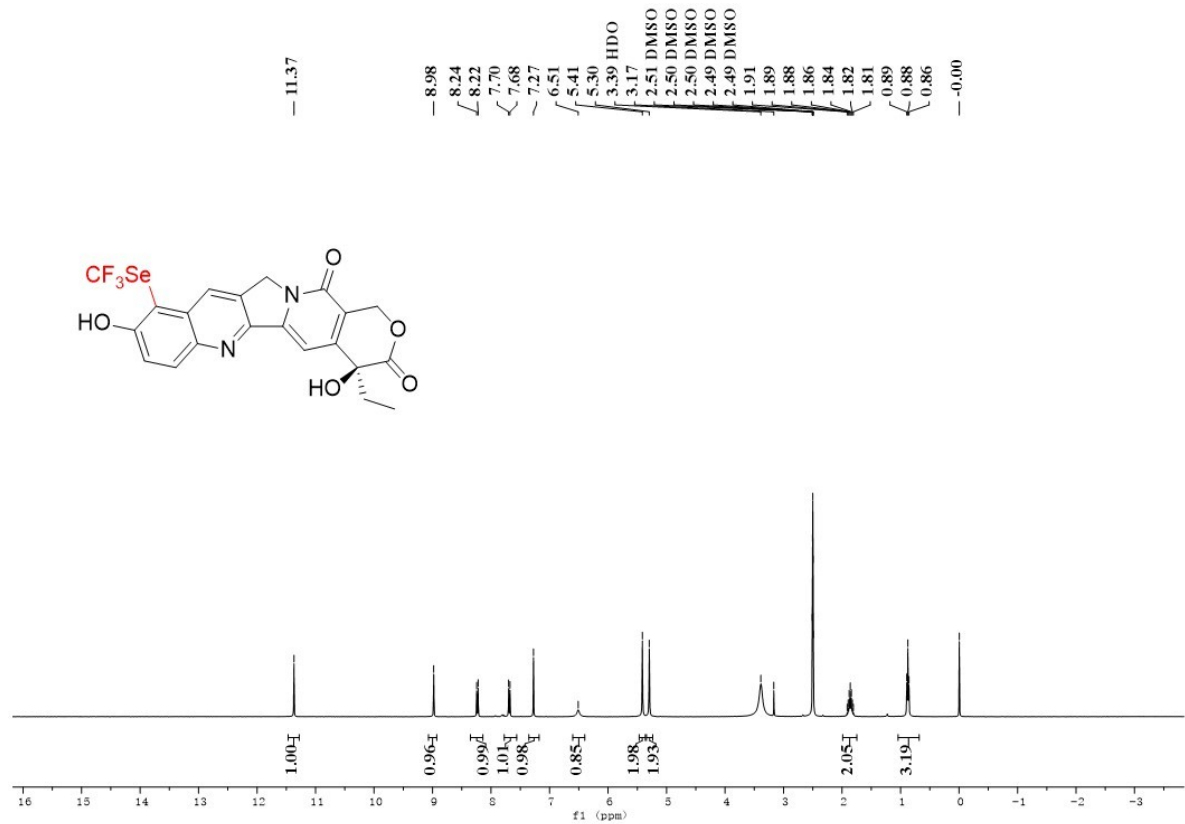

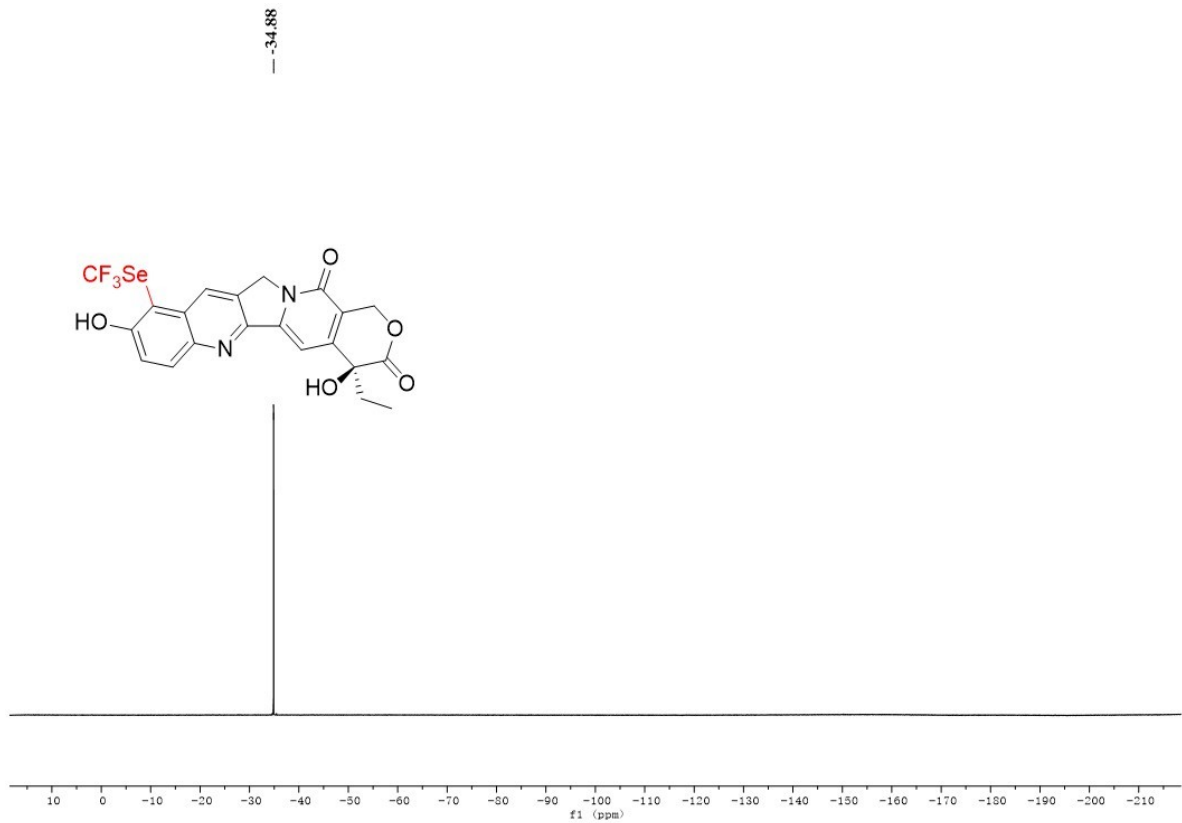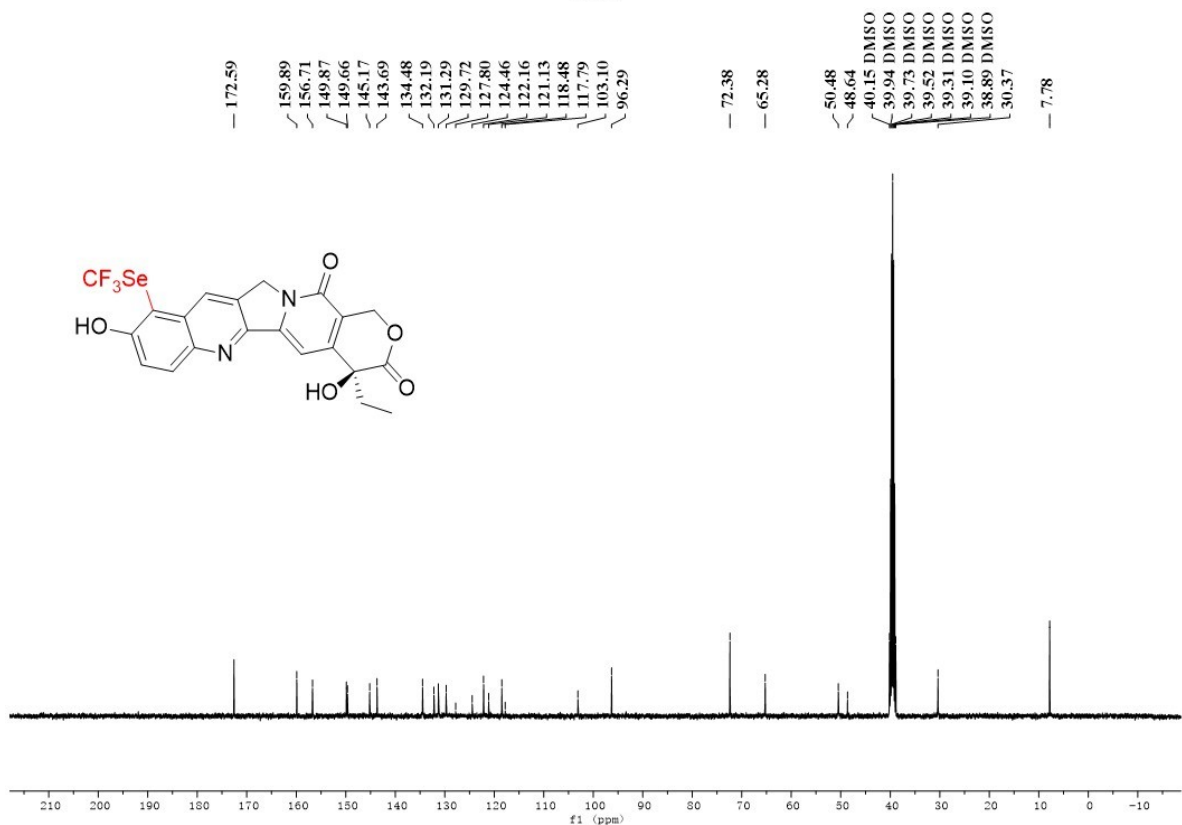

**5ce** ((S)-4,11-diethyl-4,9-dihydroxy-10-((trifluoromethyl)selanyl)-1,12-dihydro-14H-pyrano[3',4':6,7]indolizino[1,2-b]quinoline-3,14(4H)-dione)

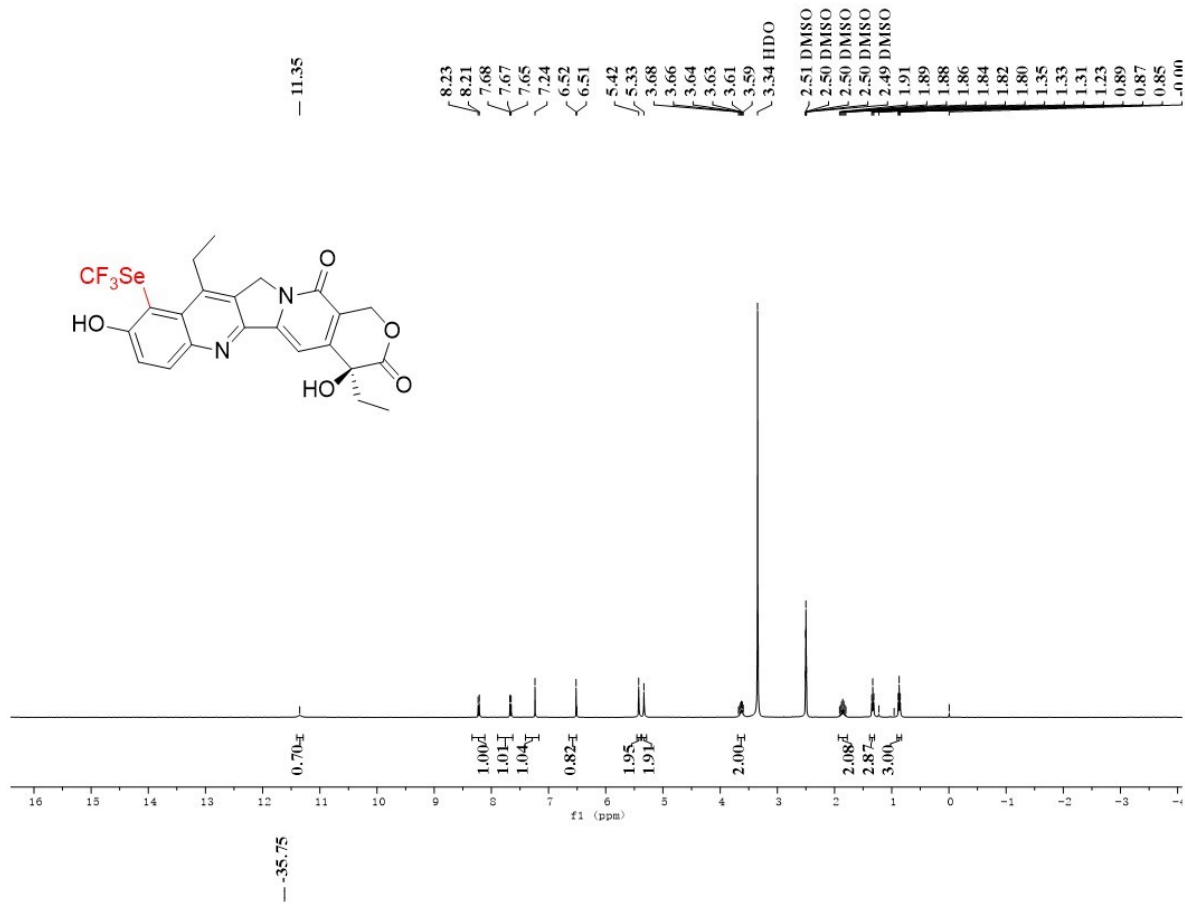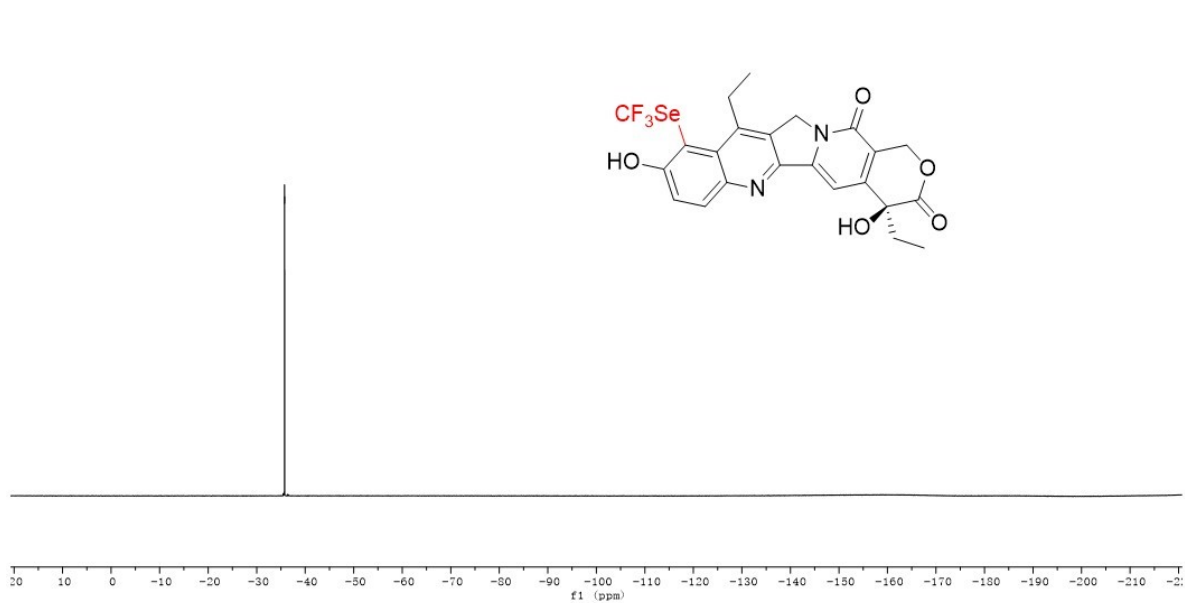



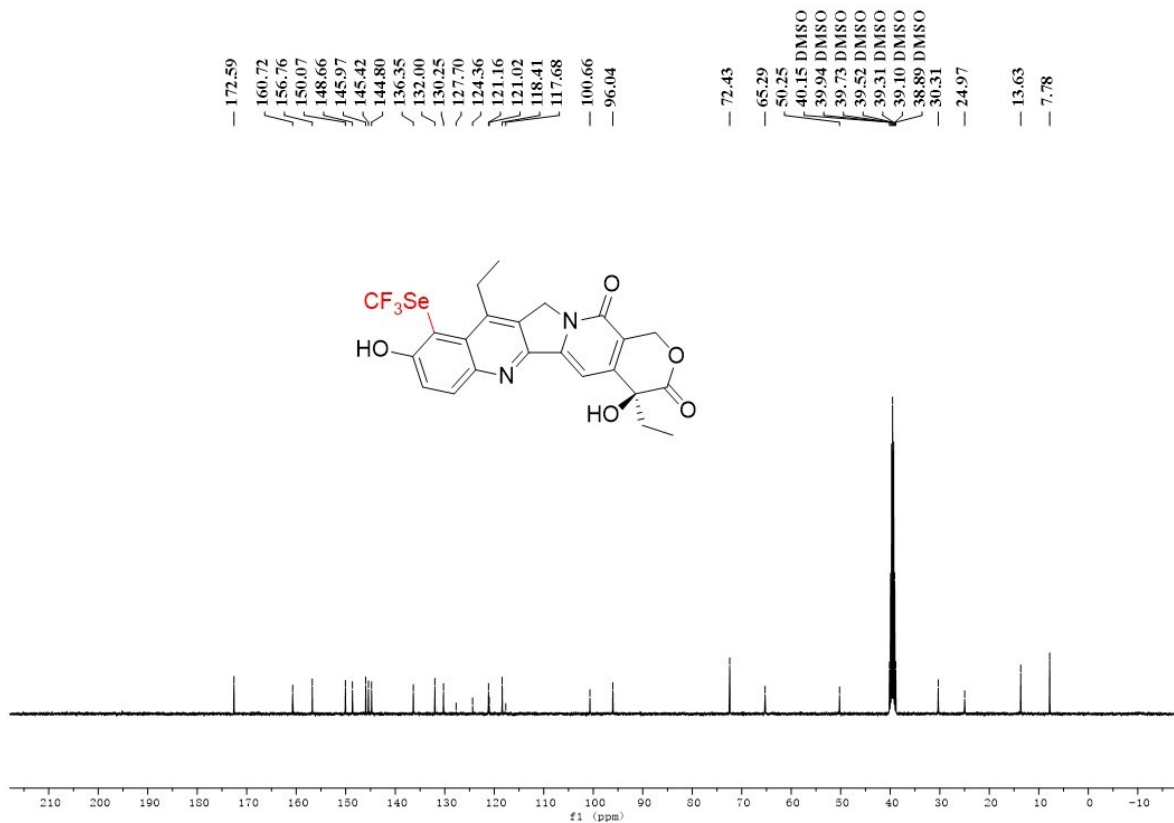

**5cf**, [A] : [B] = 3 : 2, A (methyl 2-(1-(4-chlorobenzoyl)-5-methoxy-2-methyl-6-((trifluoromethyl)selenyl)-1H-indol-3-yl)acetate)

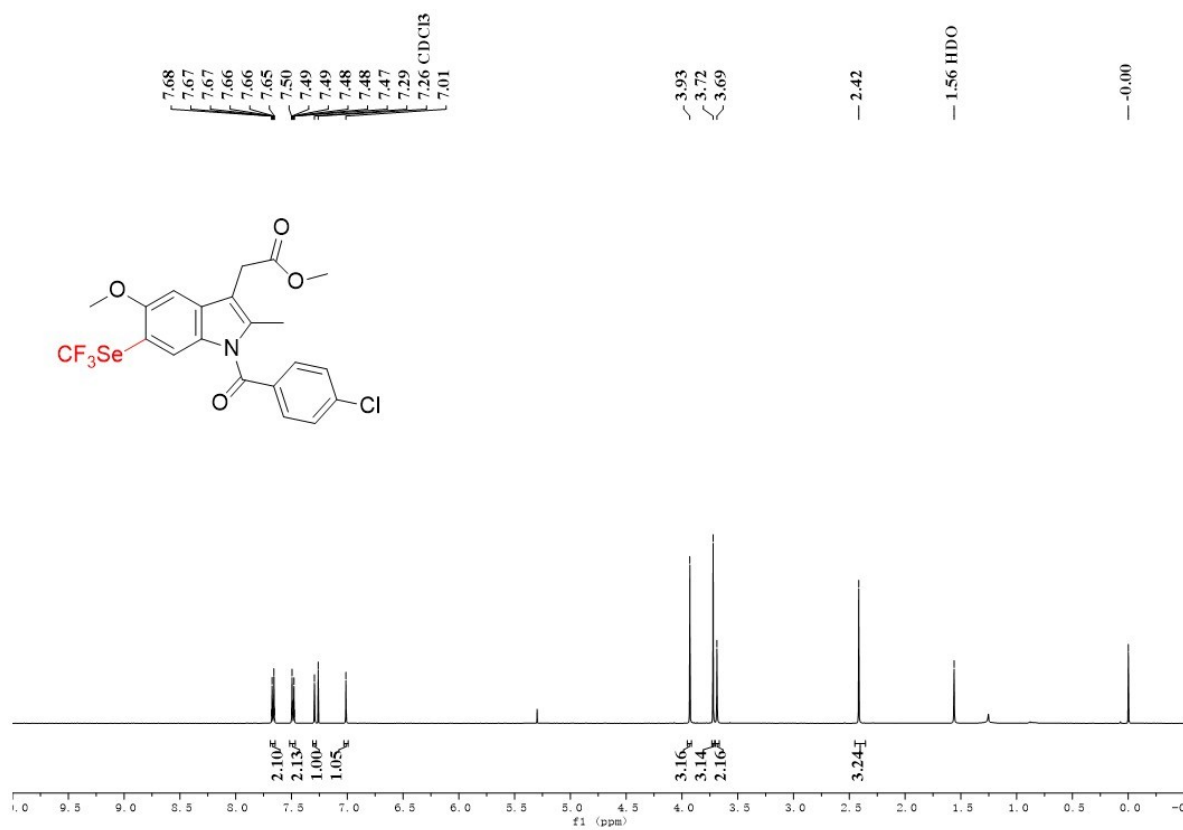

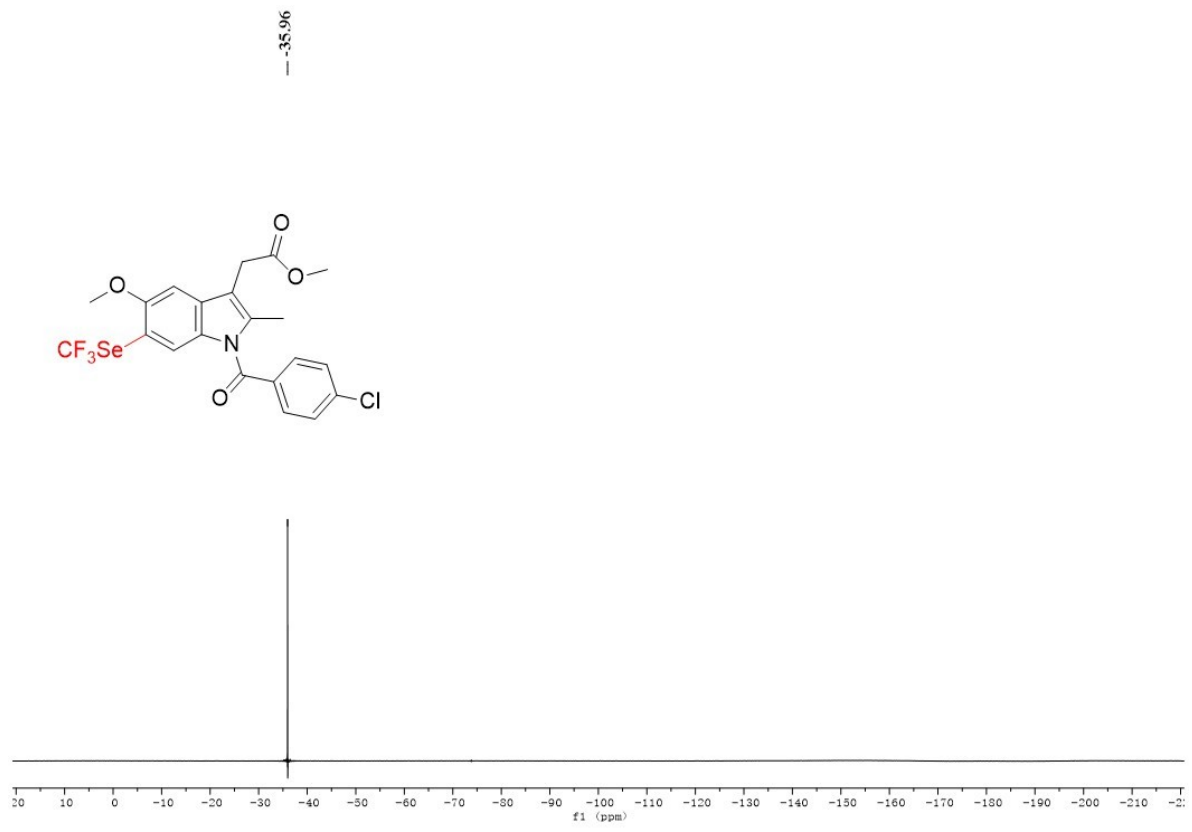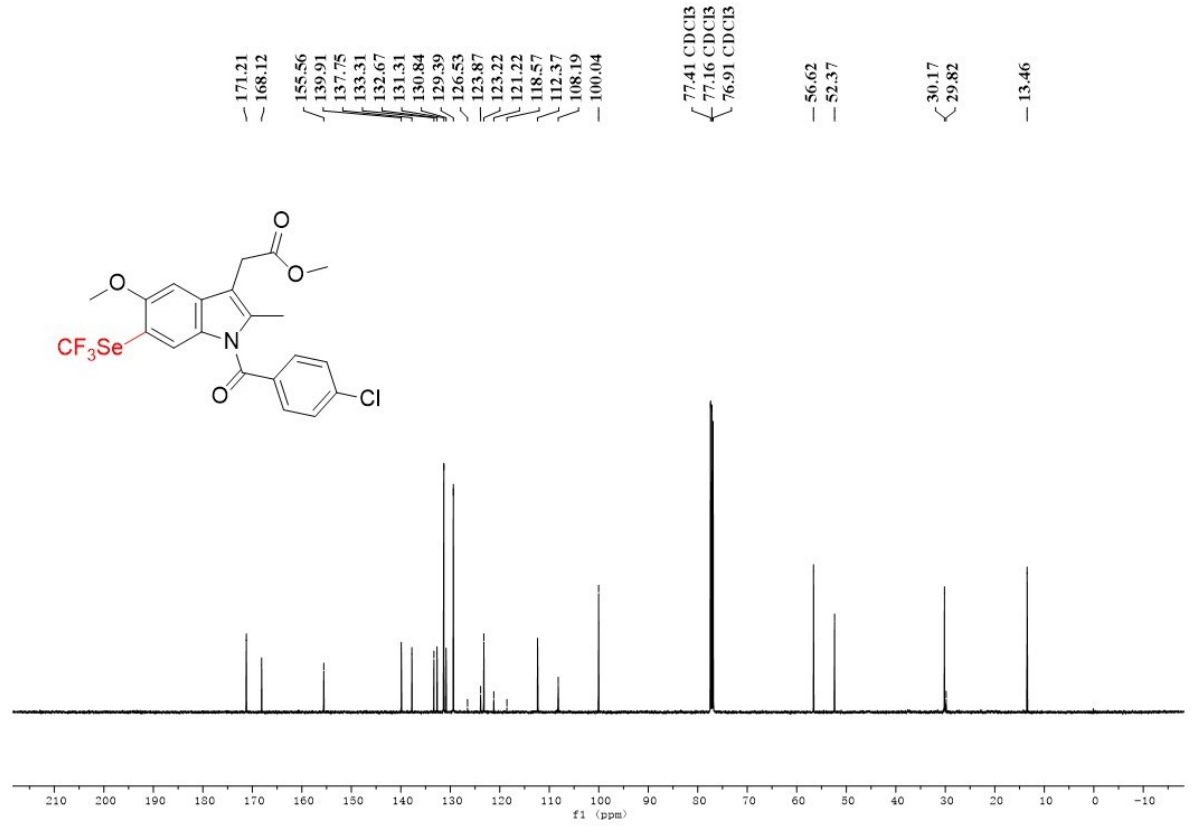

**5cf**, B (methyl 2-(1-(4-chlorobenzoyl)-5-methoxy-2-methyl-4-((trifluoromethyl)selenanyl)-1H-indol-3-yl)acetate)

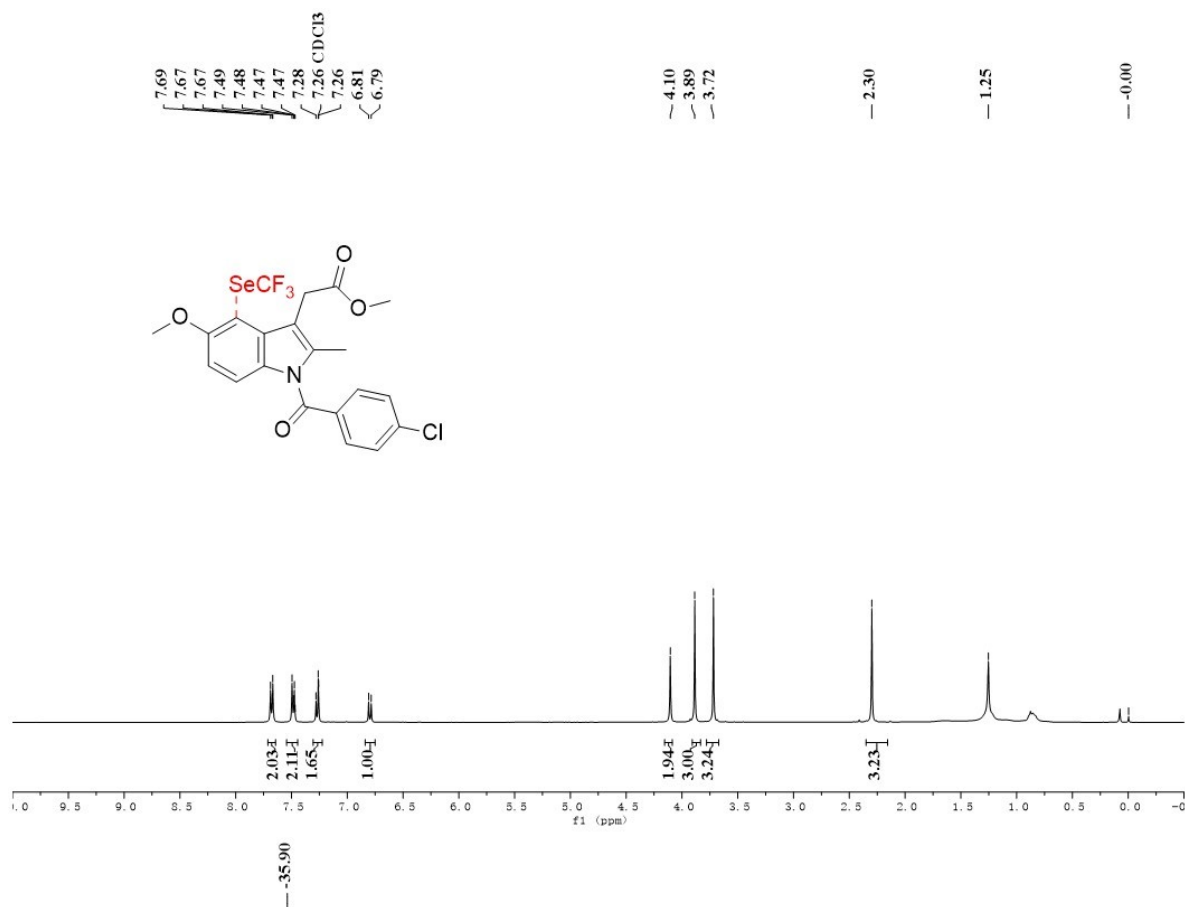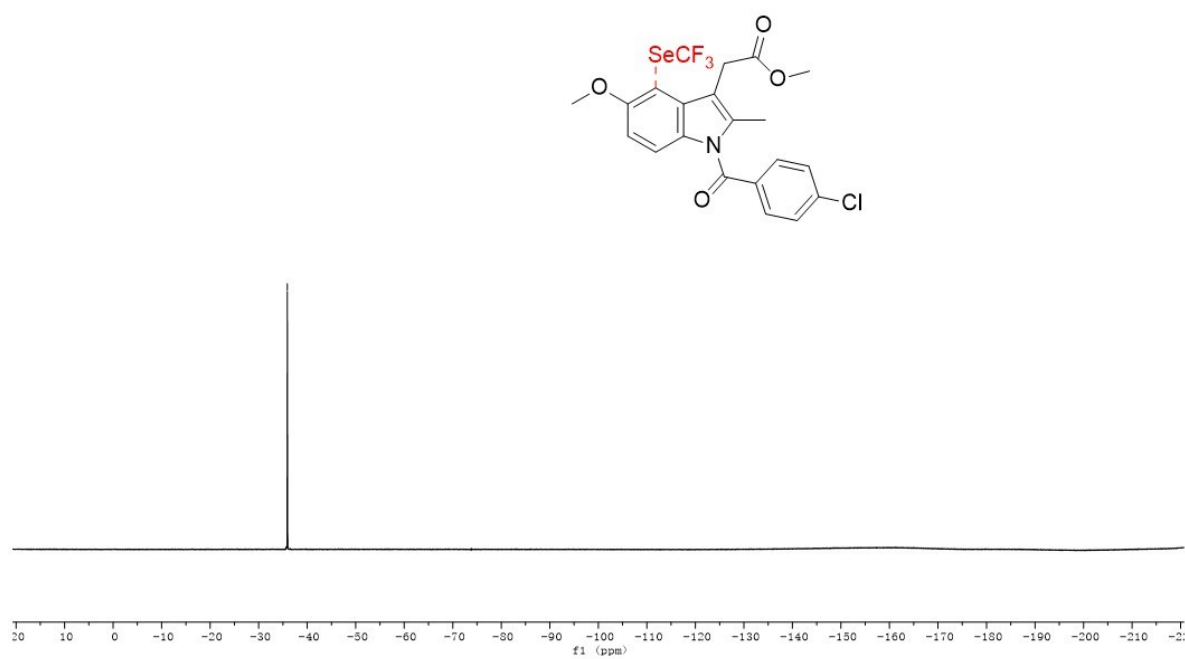

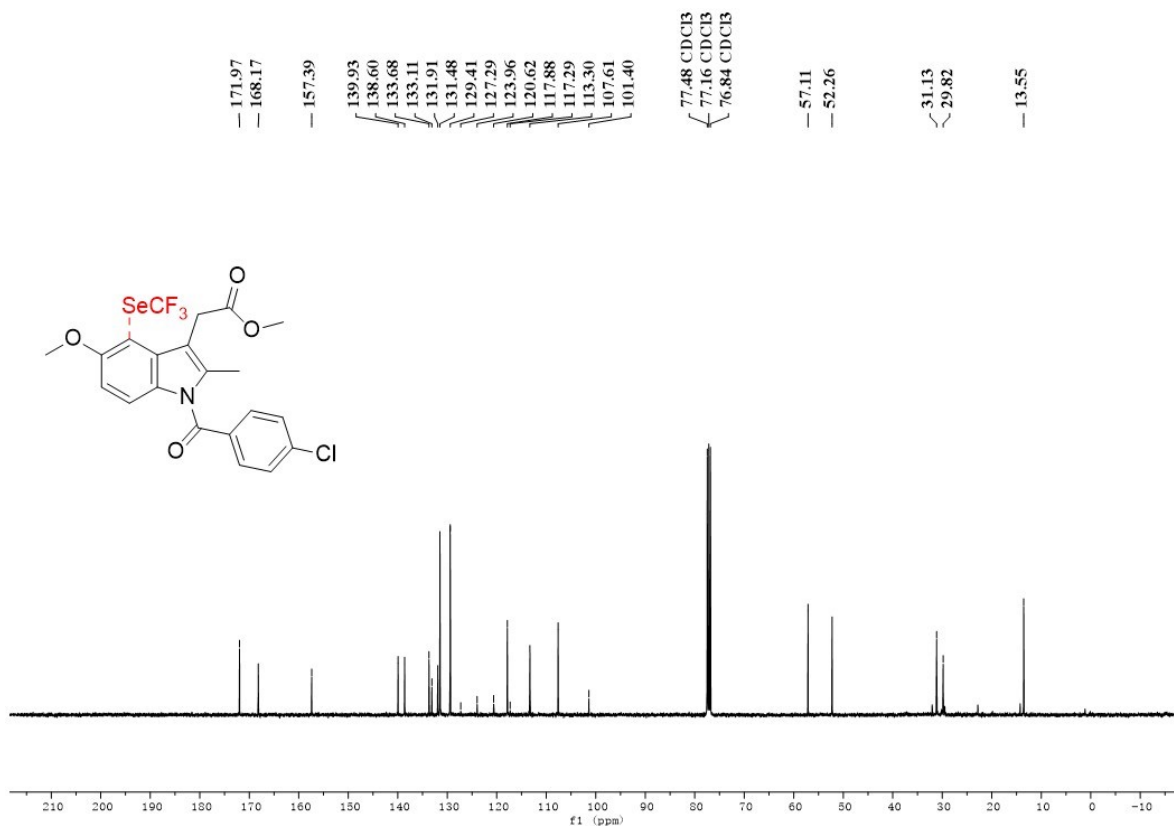

**5cg** ((S)-3-(4-(2-chloro-5-iodobenzyl)-2-((trifluoromethyl)selanyl)phenoxy) tetrahydrofuran)

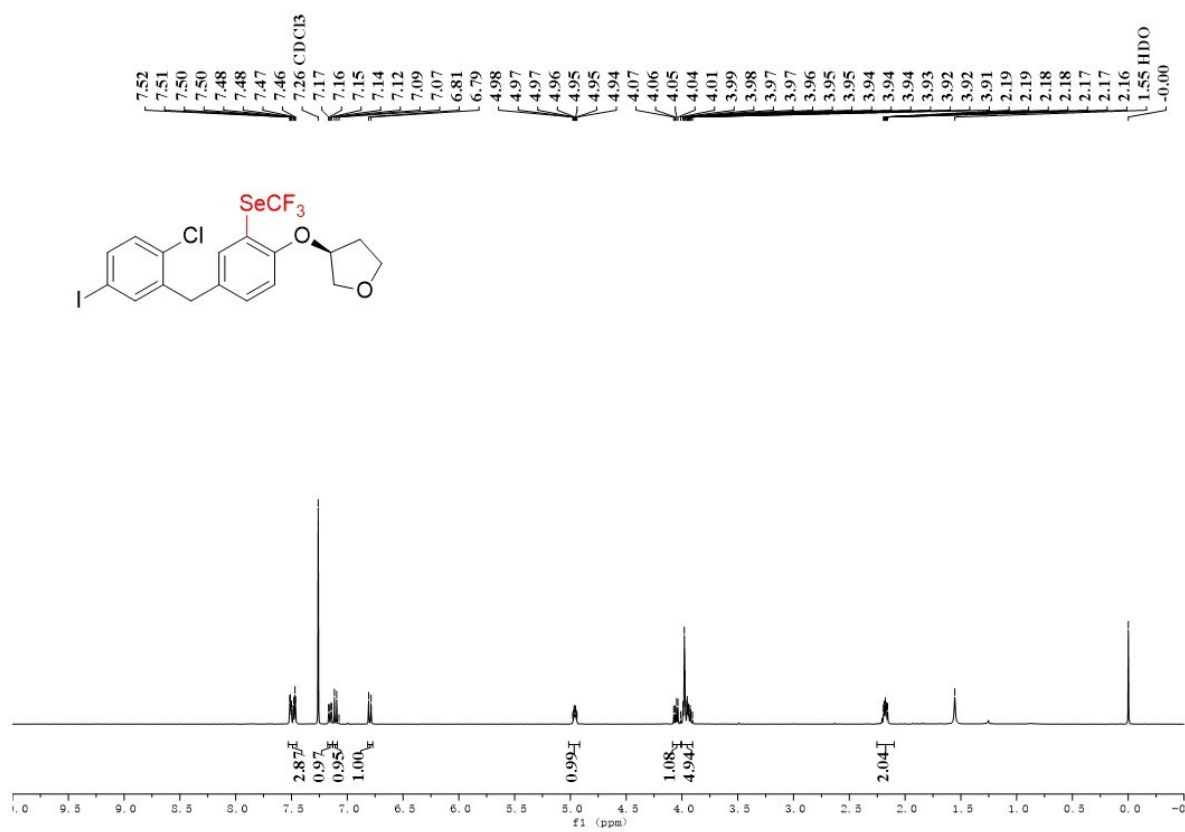

-34.91

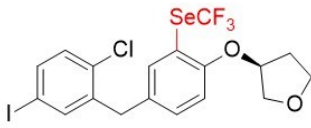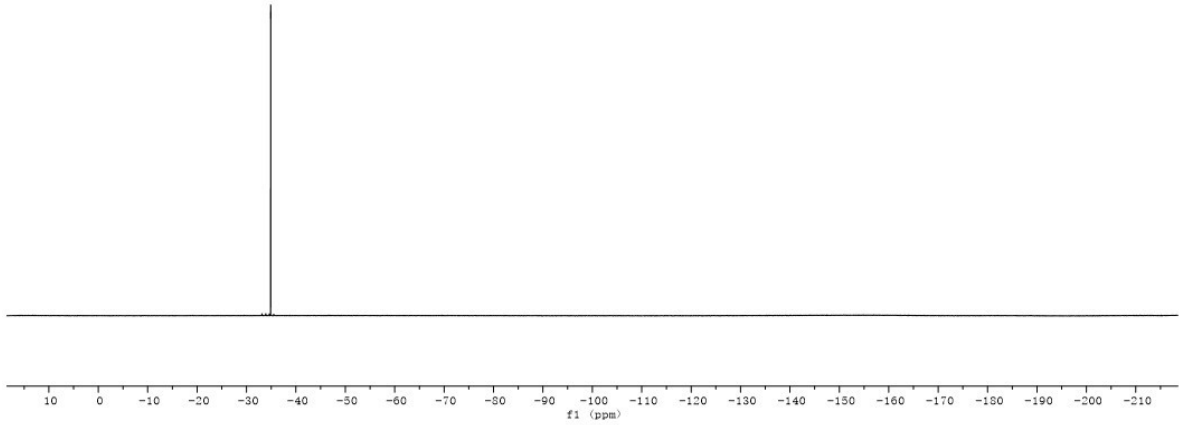

155.71  
140.66  
139.58  
137.68  
137.01  
134.30  
132.28  
131.87  
131.42  
126.59  
123.94  
121.29  
118.64  
114.07  
113.15  
- 91.84  
78.68  
77.41 CDCl<sub>3</sub>  
77.16 CDCl<sub>3</sub>  
76.91 CDCl<sub>3</sub>  
72.95  
67.28  
- 37.87  
- 33.14

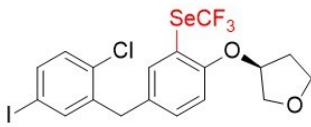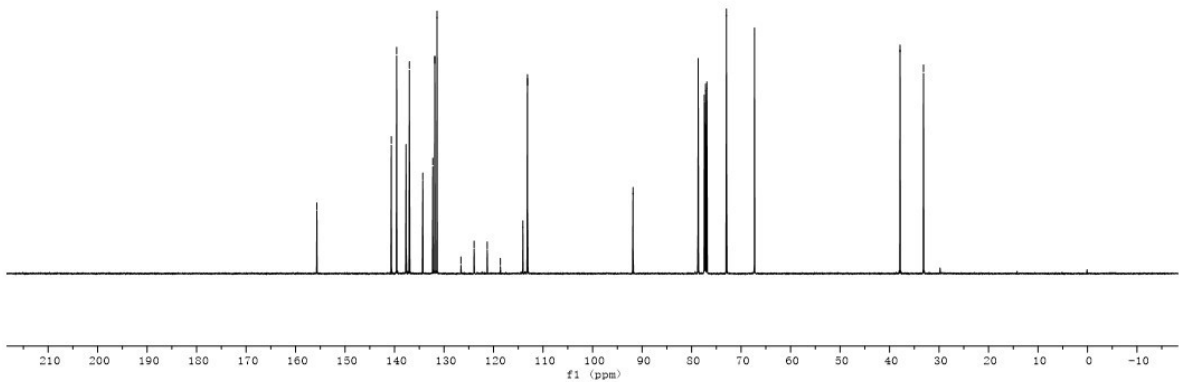

**5ch** ((5S,5aR,8aR,9R)-9-hydroxy-5-(3,4,5-trimethoxy-2-((trifluoromethyl)selenyl)phenyl)-5,8,8a,9-tetrahydrofuro[3',4':6,7]naphtho[2,3-d][1,3]dioxol-6(5aH)-one)

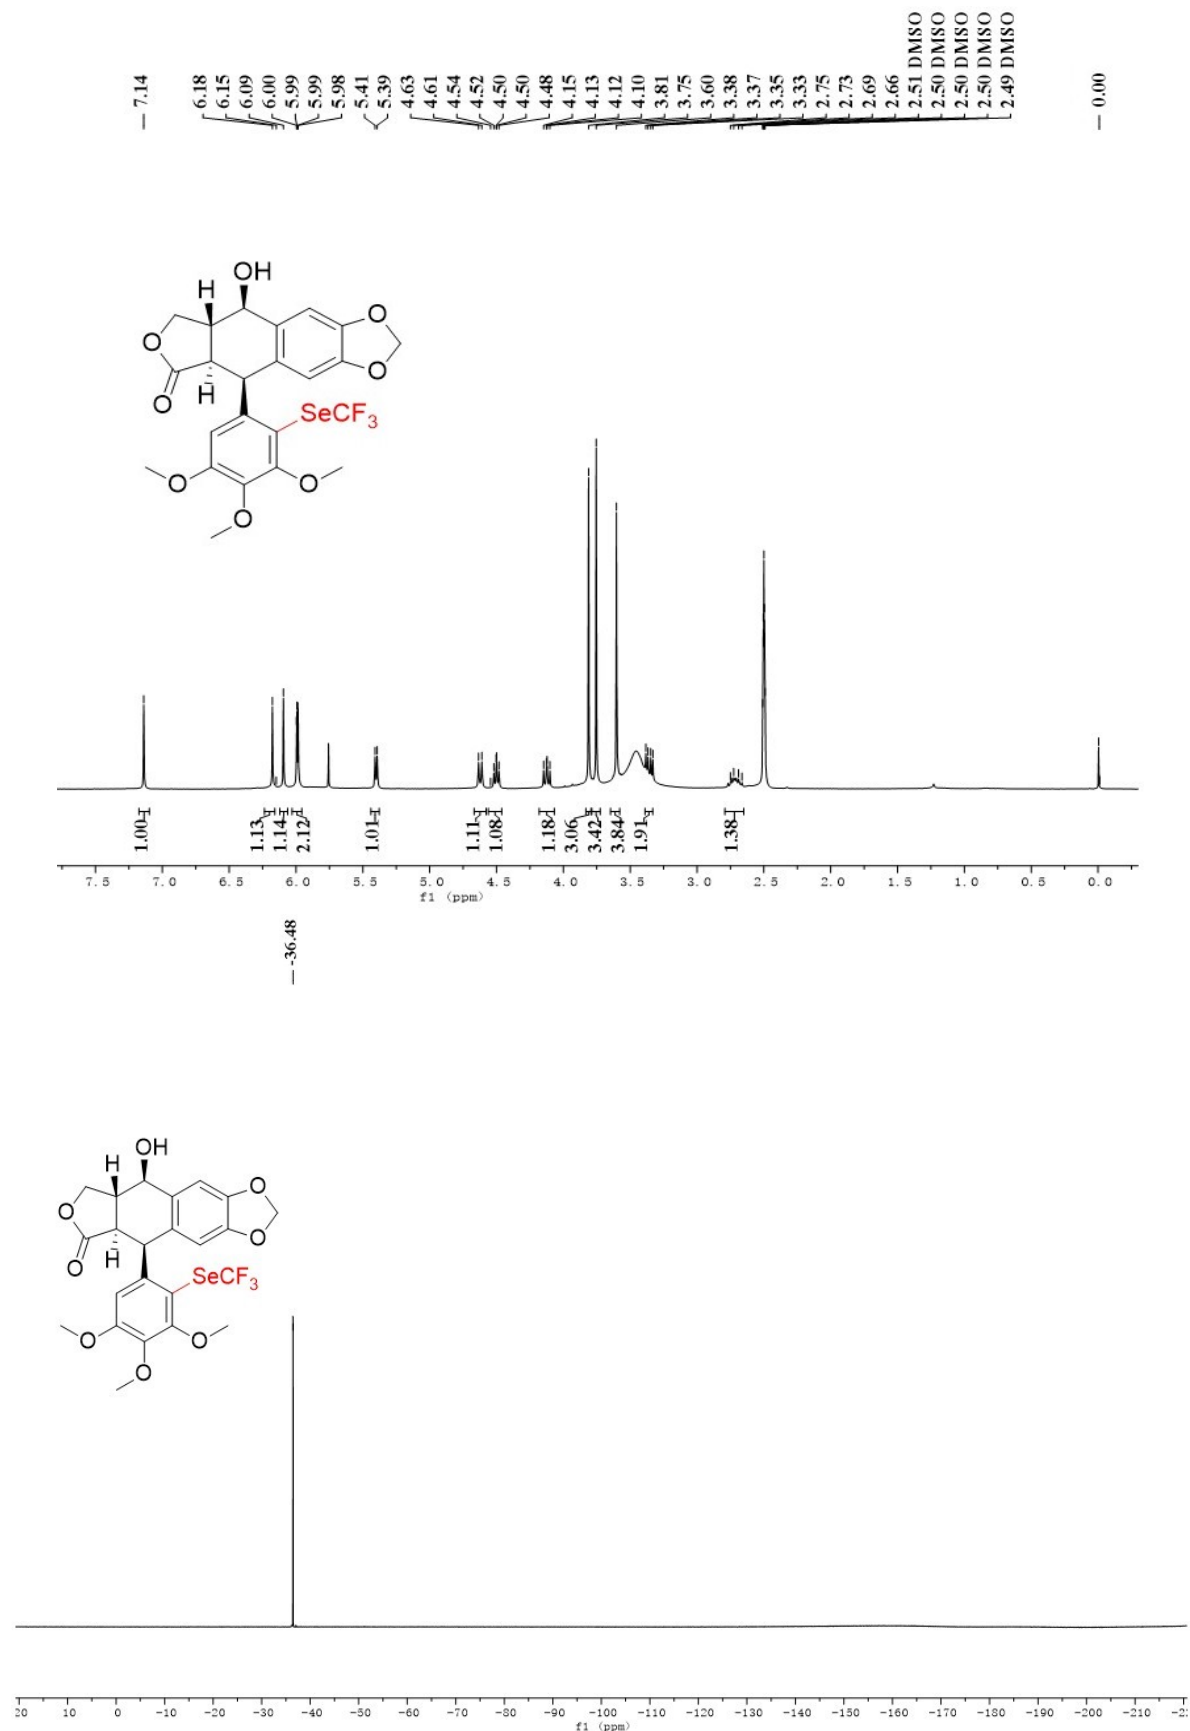

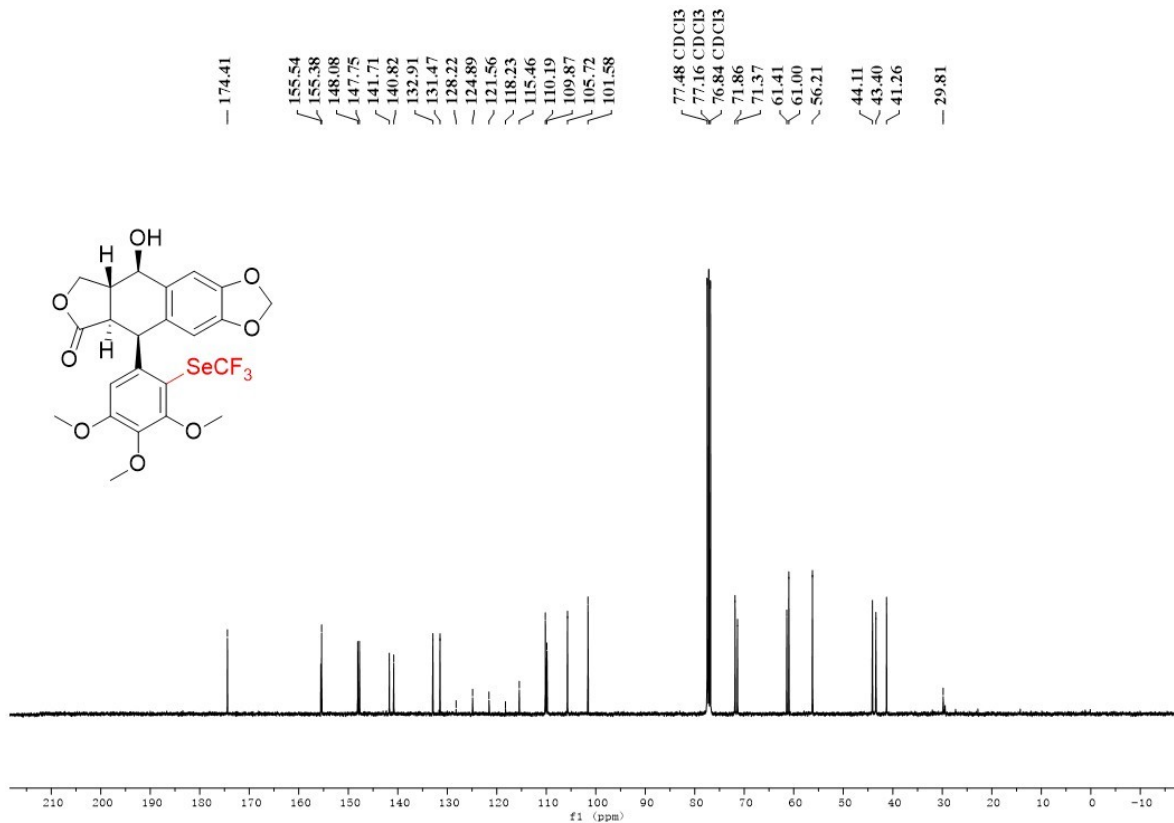

**5ci** ((S)-N-(1,2,3,10-tetramethoxy-9-oxo-4-((trifluoromethyl)selenanyl)-5,6,7,9-tetrahydrobenzo[a]heptalen-7-yl)acetamide)

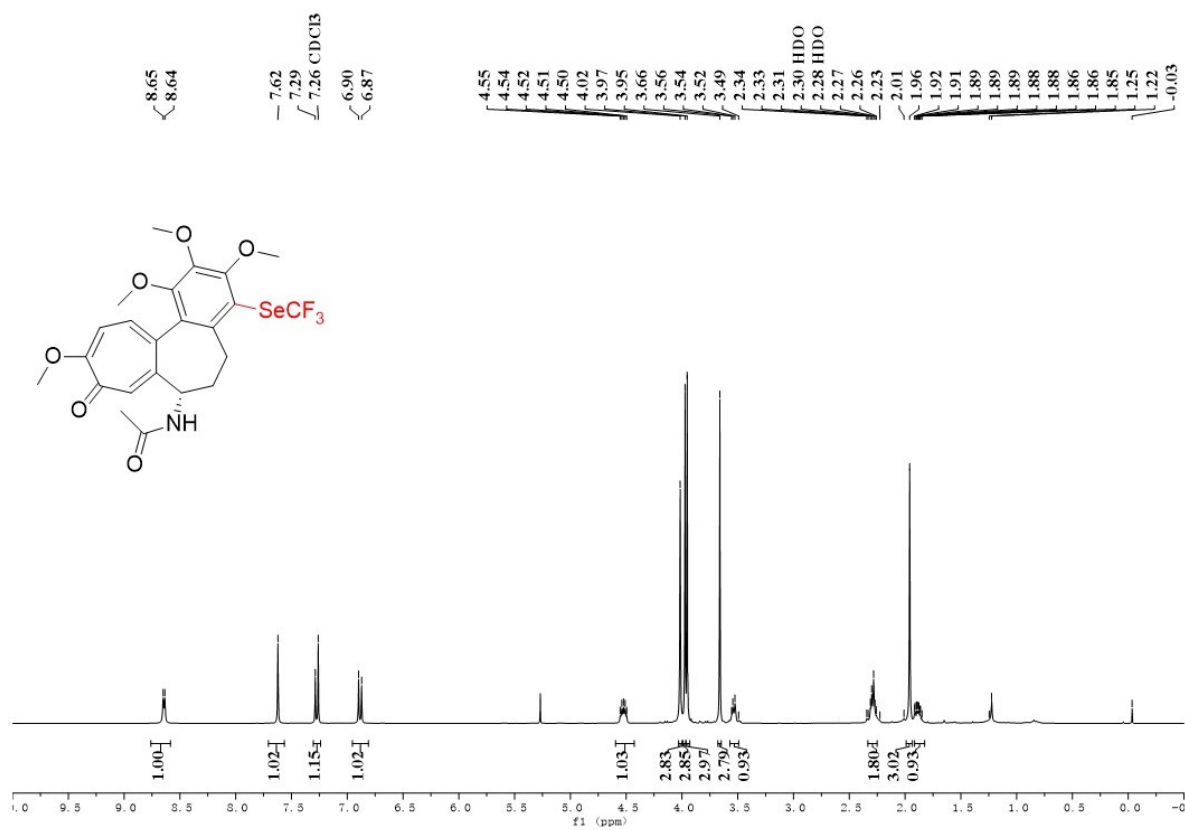

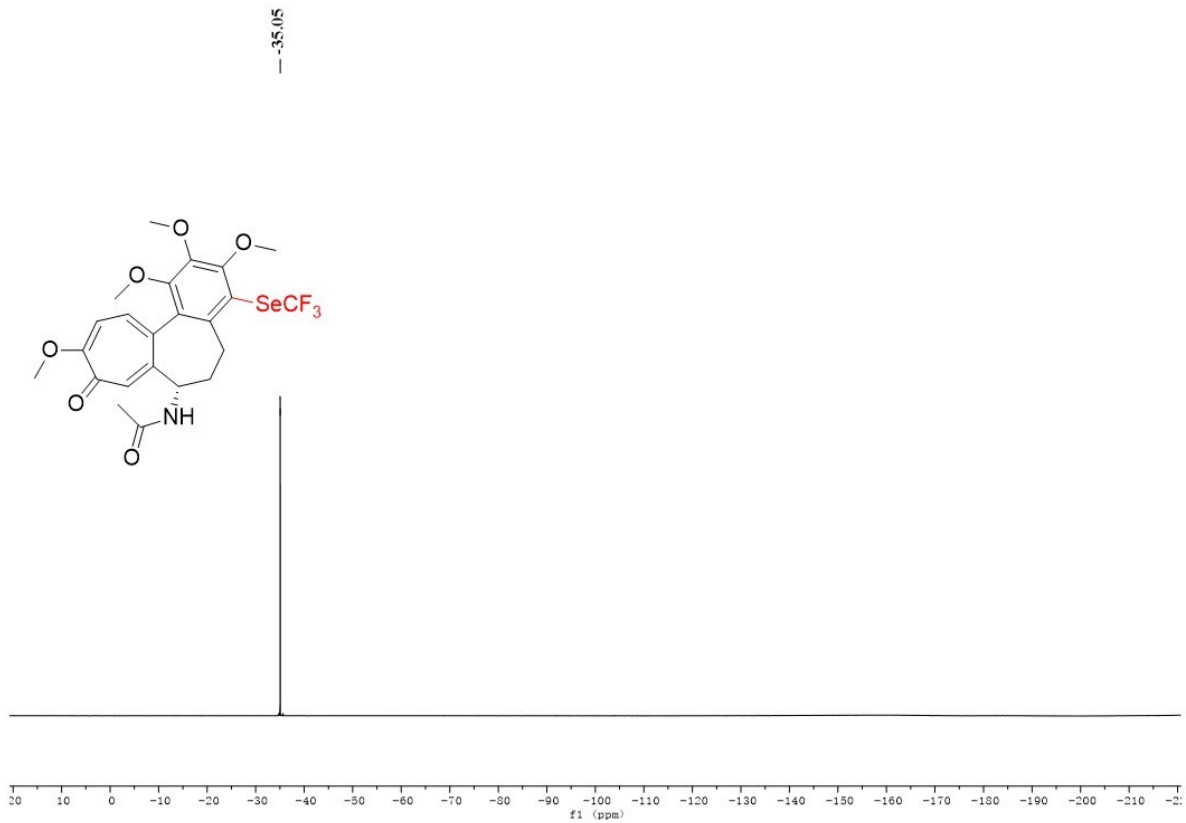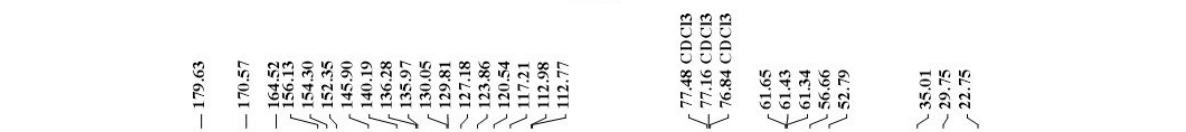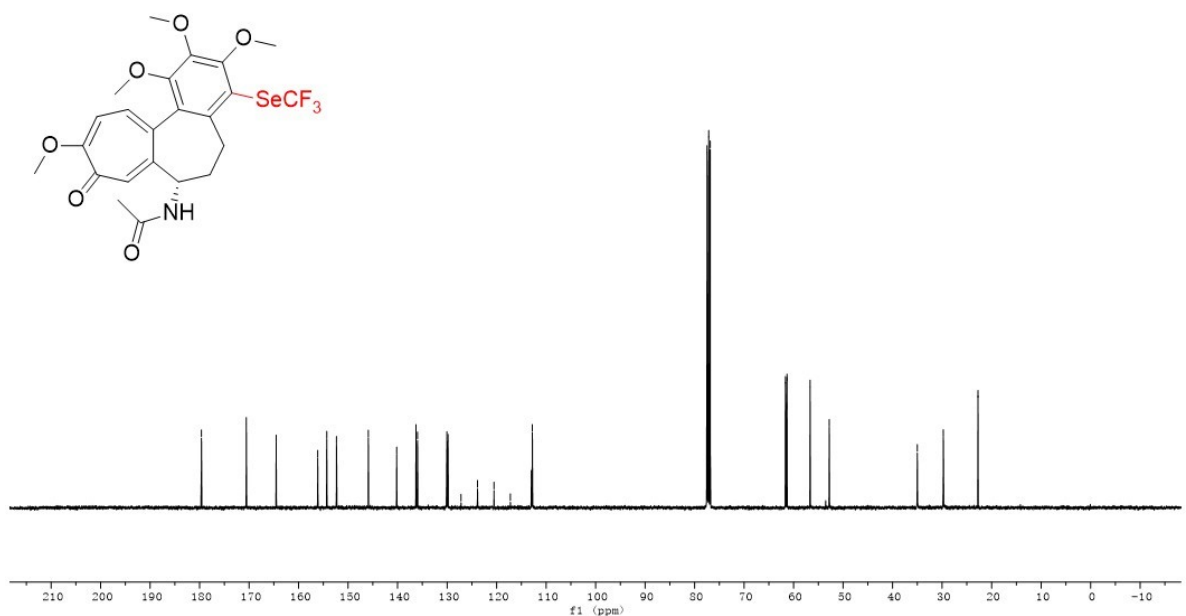



**5cj** (tert-butyl (3R,4S)-4-(4-fluorophenyl)-3-(((6-((trifluoromethyl)selenanyl)benzo[d][1,3]dioxol-5-yl)oxy)methyl)piperidine-1-carboxylate)

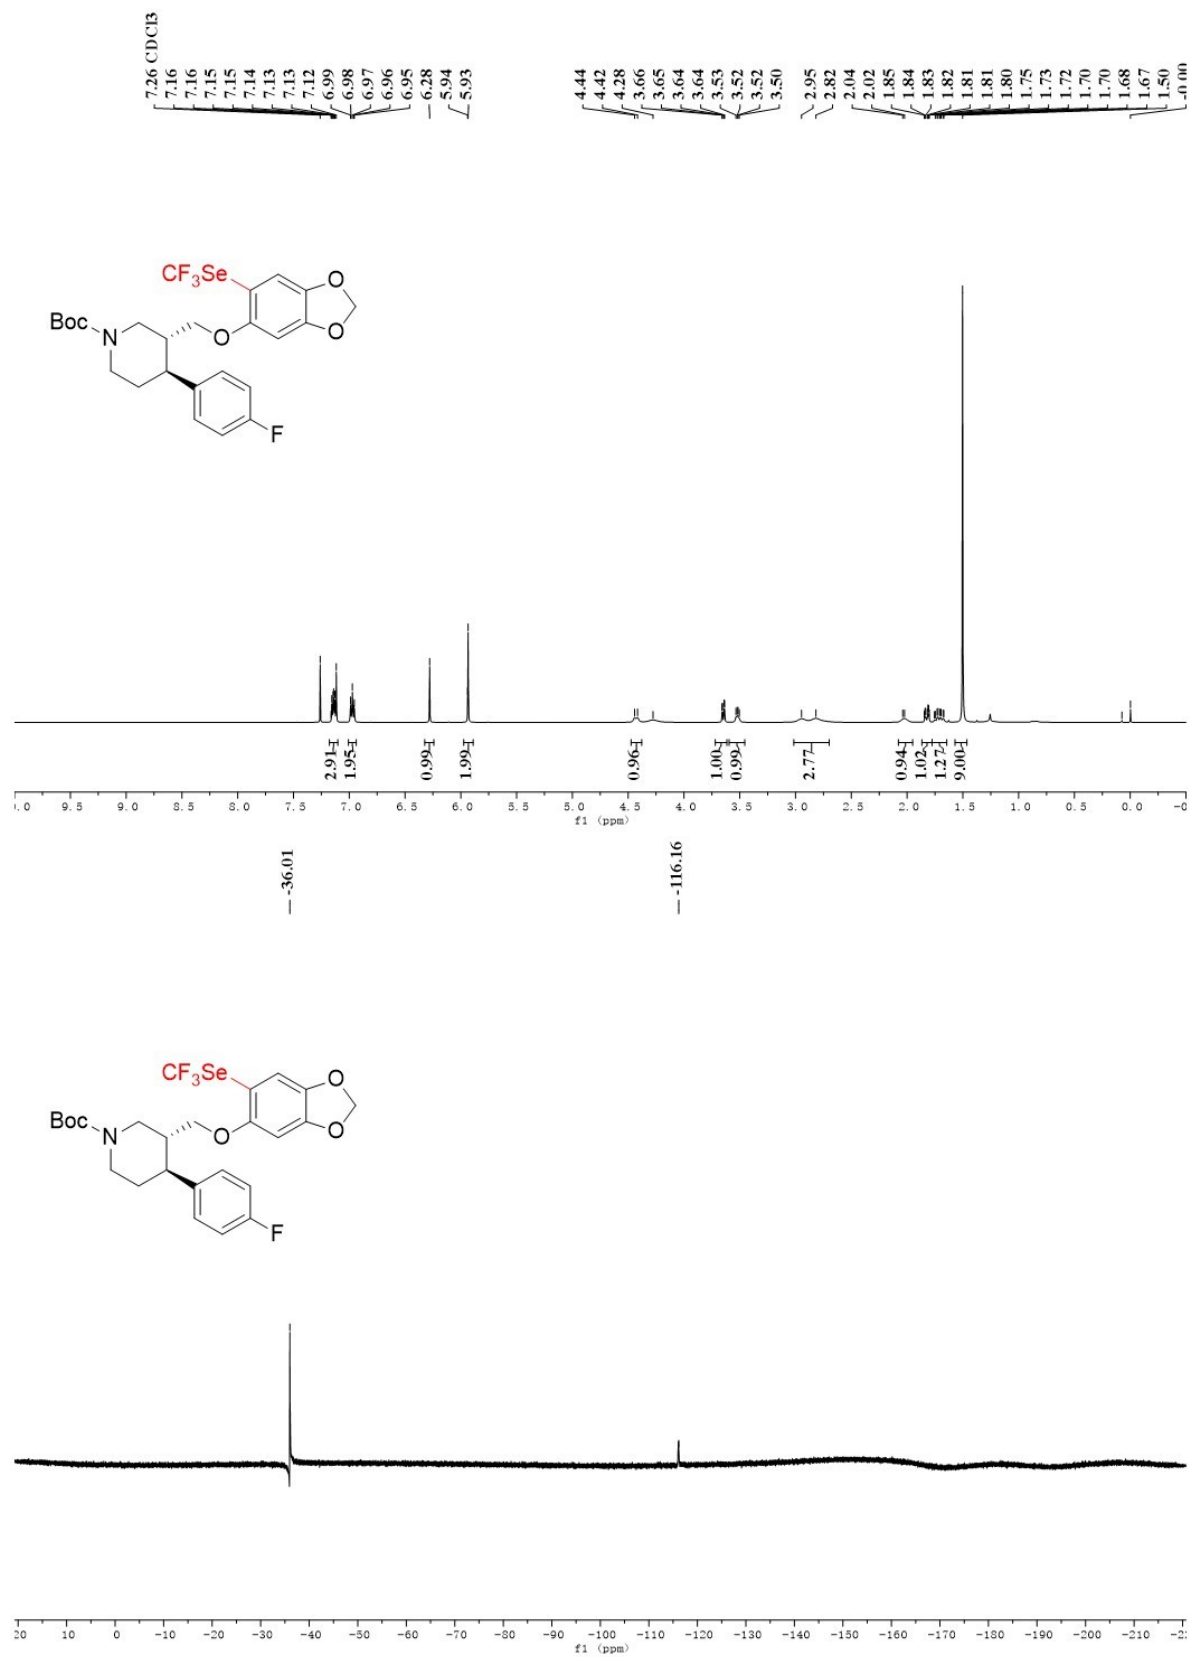

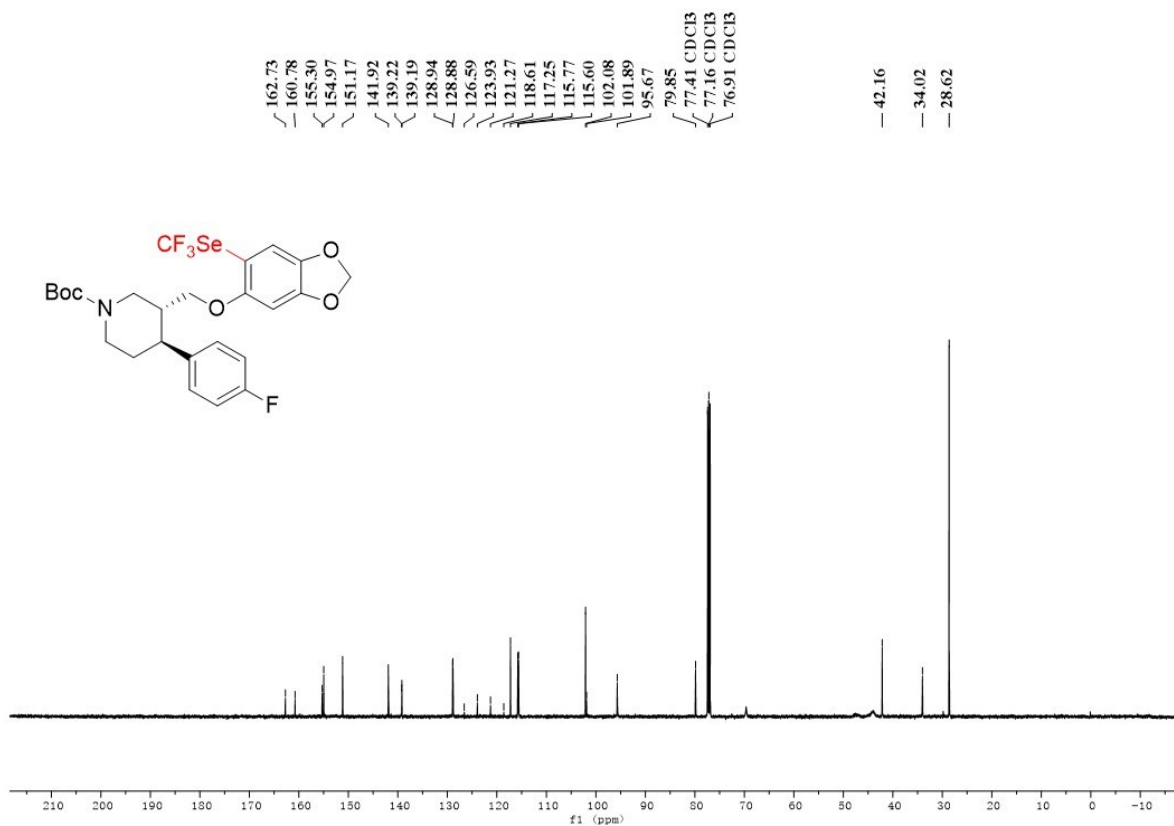

**5ck** (methyl 2-(2-((2,6-dichlorophenyl)amino)-5-((trifluoromethyl)selanyl)phenyl)acetate)

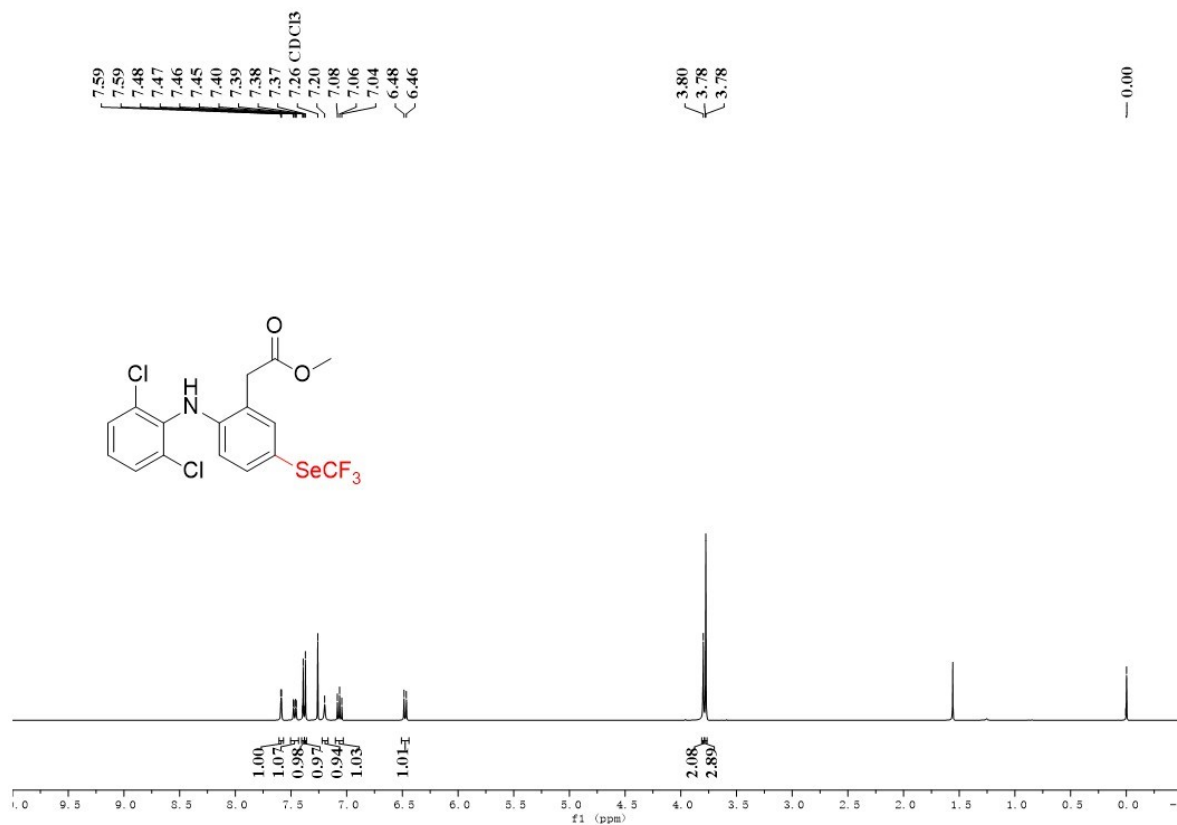

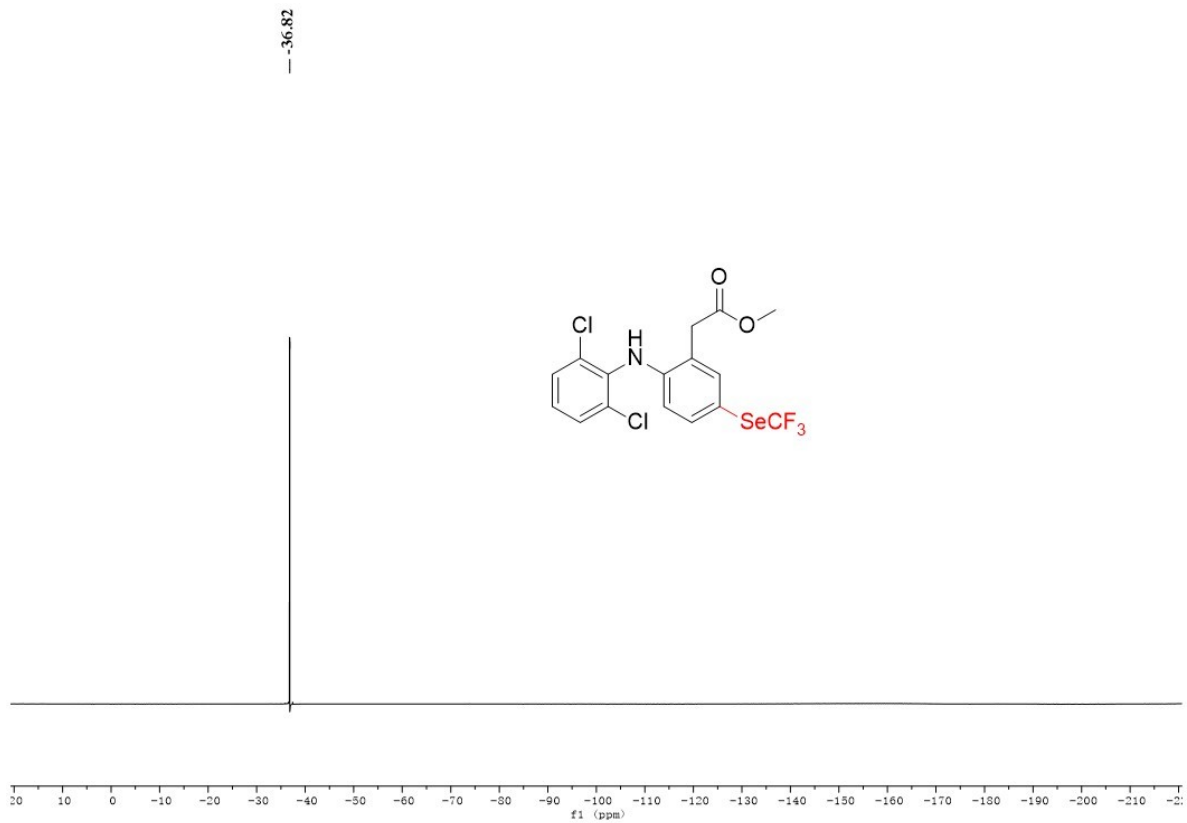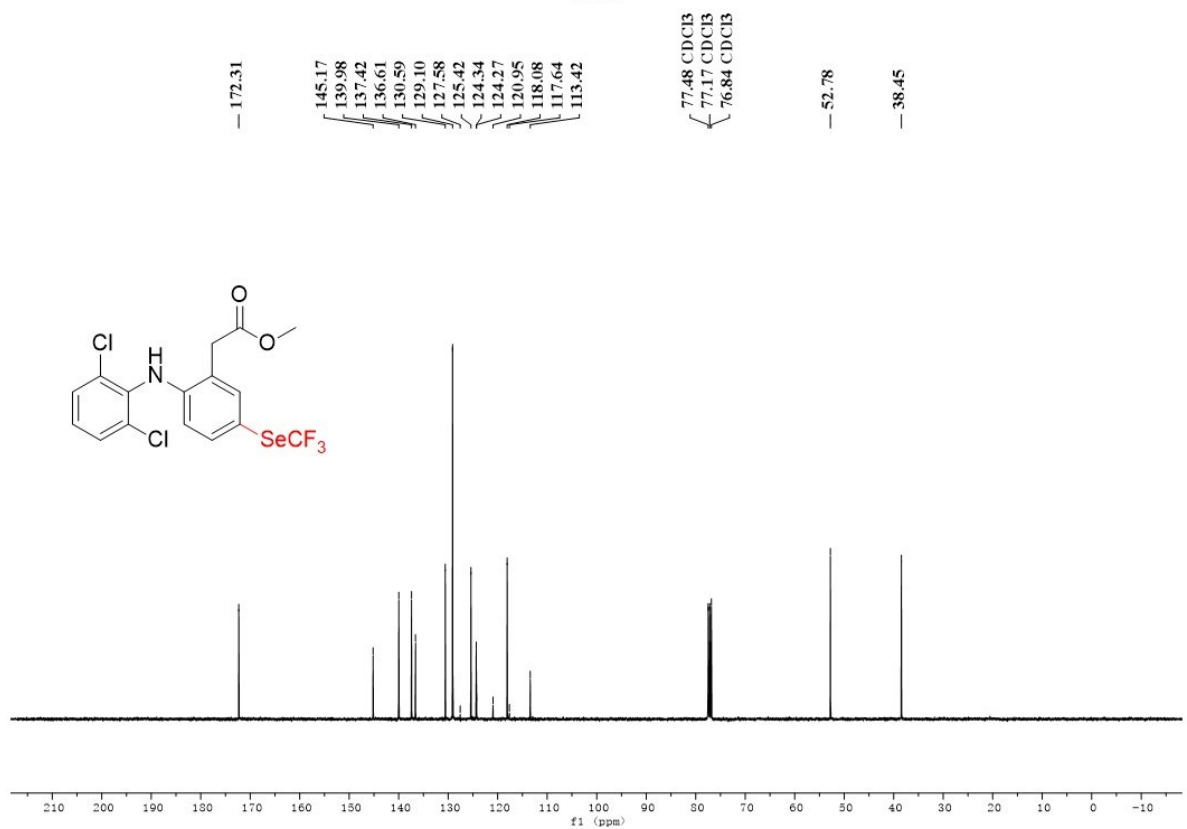

**5cl** (N-(4-methyl-5-((4-(pyridin-3-yl)pyrimidin-2-yl)amino)-2-((trifluoromethyl)selenyl)phenyl)-4-((4-methylpiperazin-1-yl)methyl)benzamide)

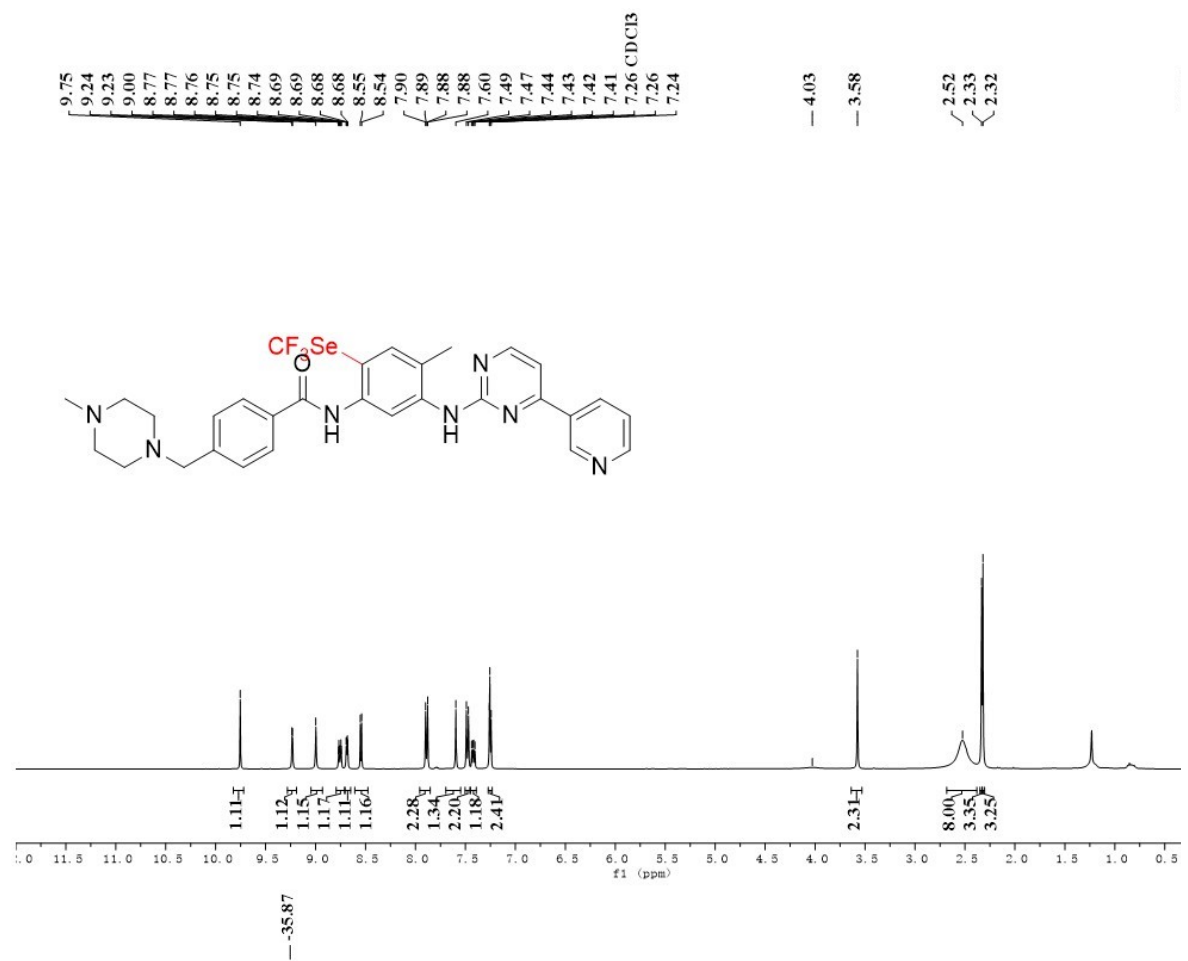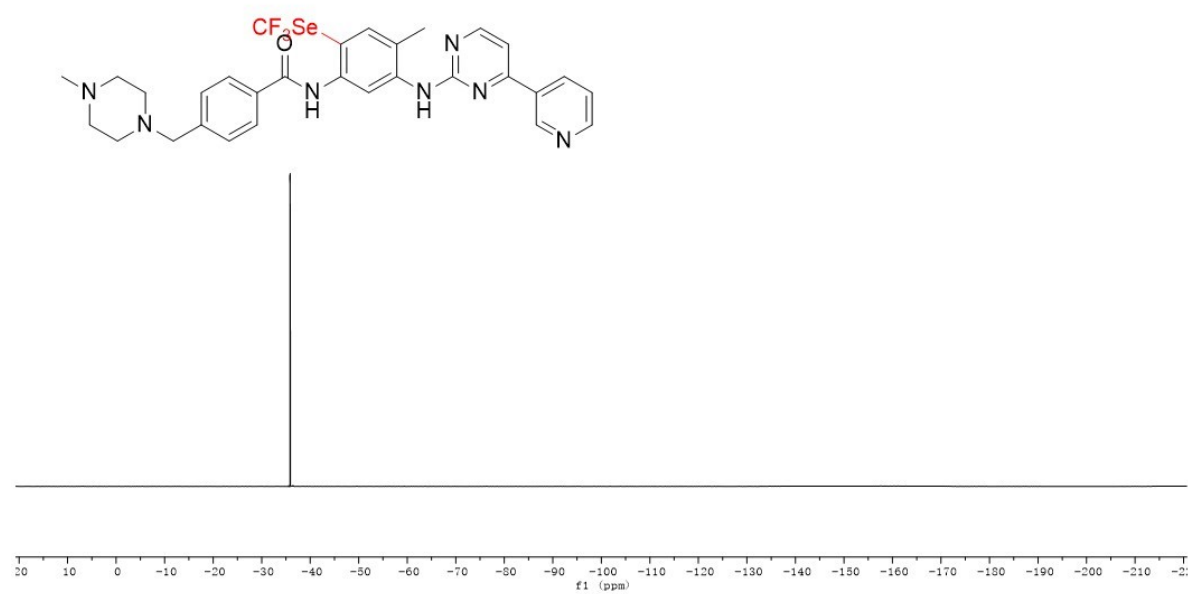

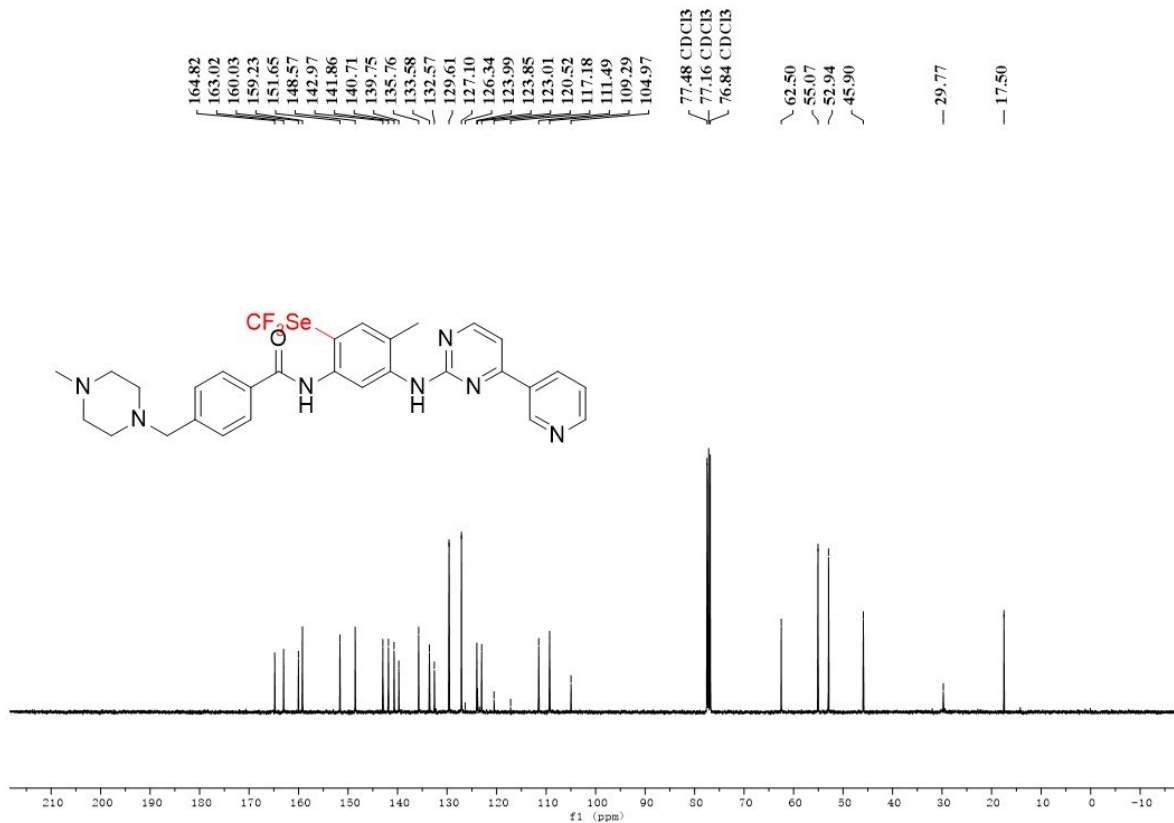

**5cm (N-((5-((trifluoromethyl)selenanyl)furan-2-yl)methyl)-7H-purin-6-amine)**

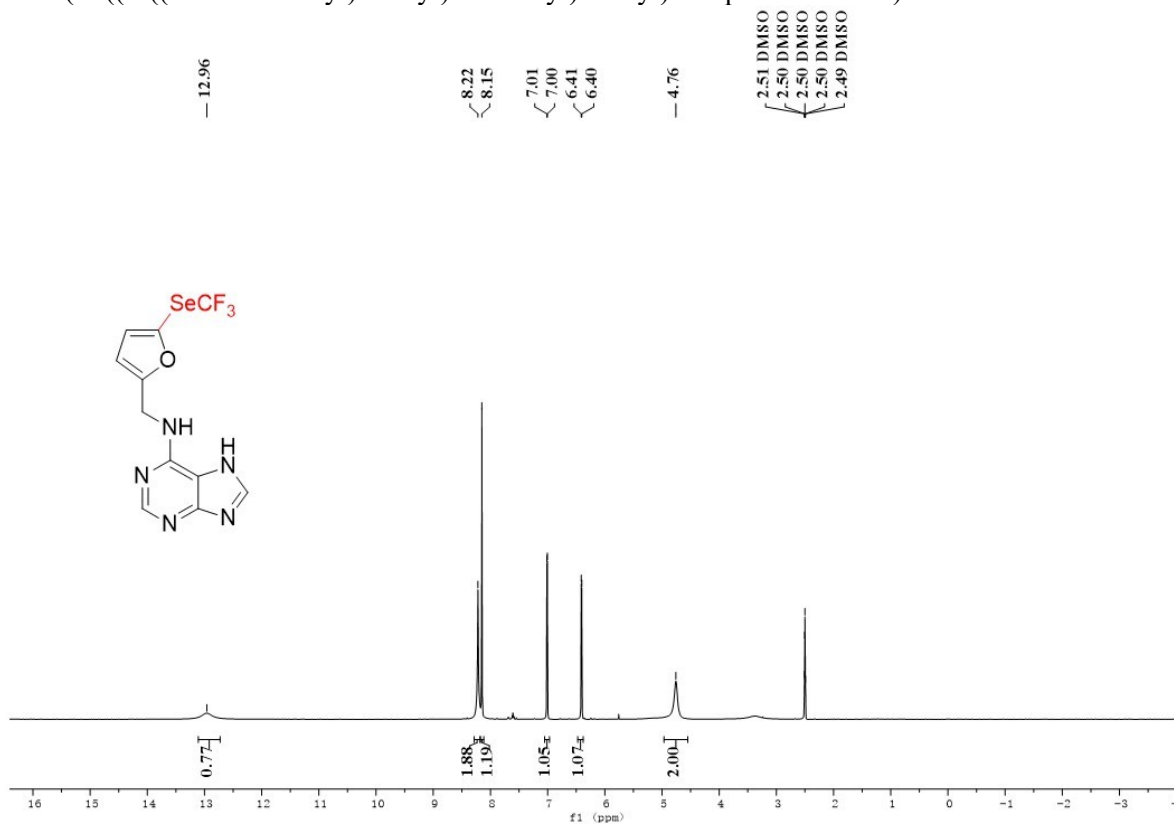

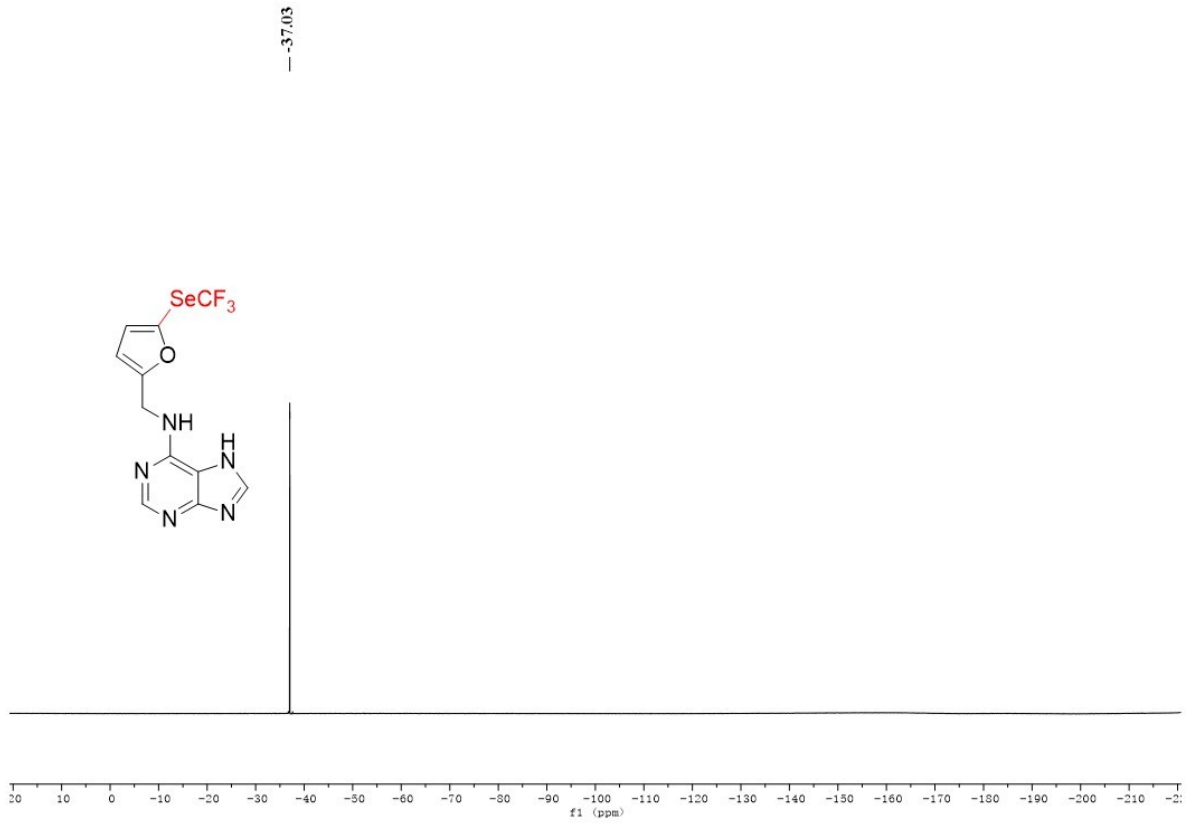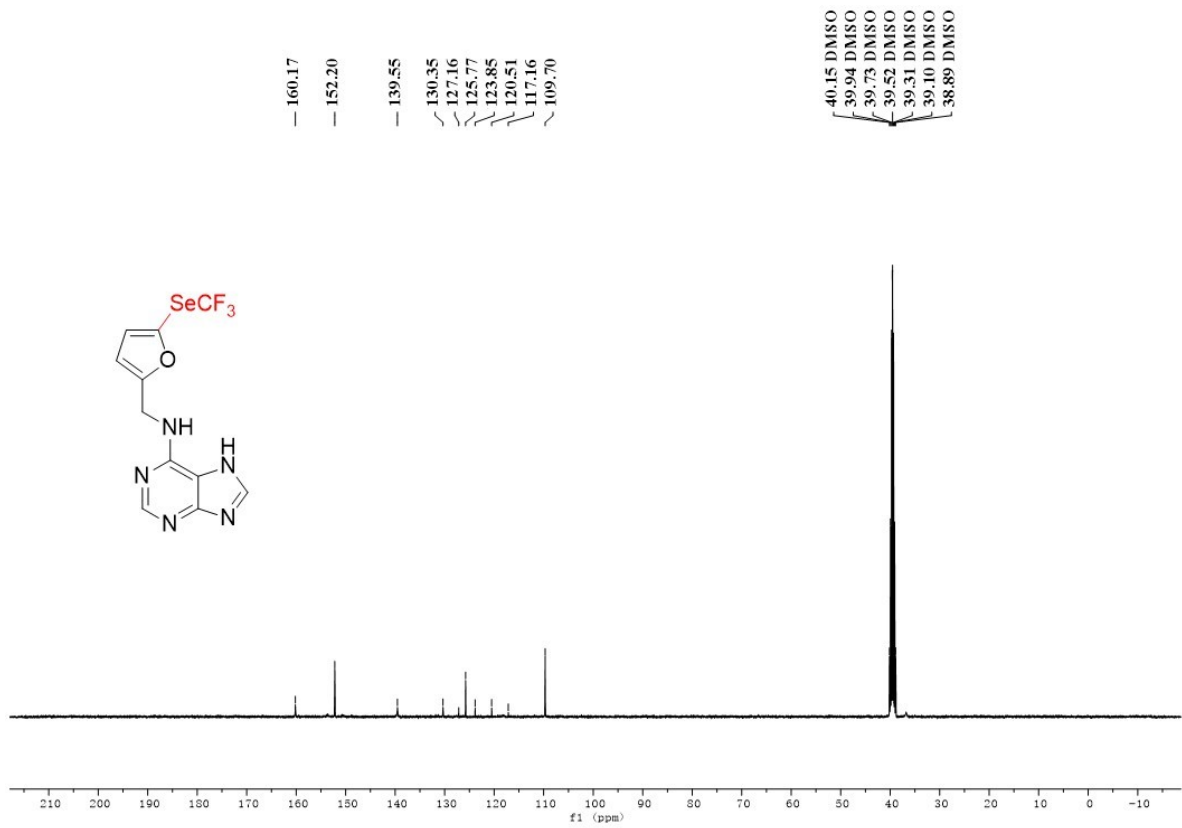

**5cn** (5-((3,5-dimethyl-2,4-bis((trifluoromethyl)selenyl)phenoxy)methyl)oxazolidin-2-one)

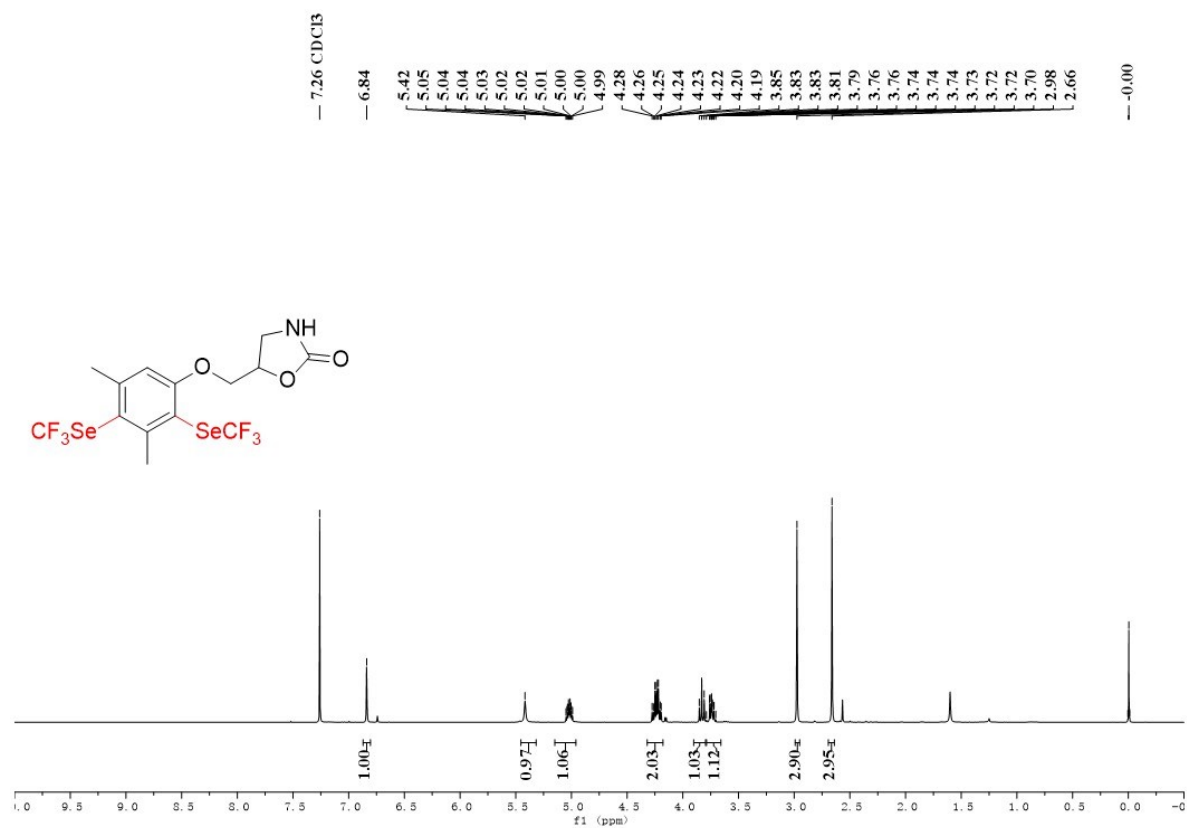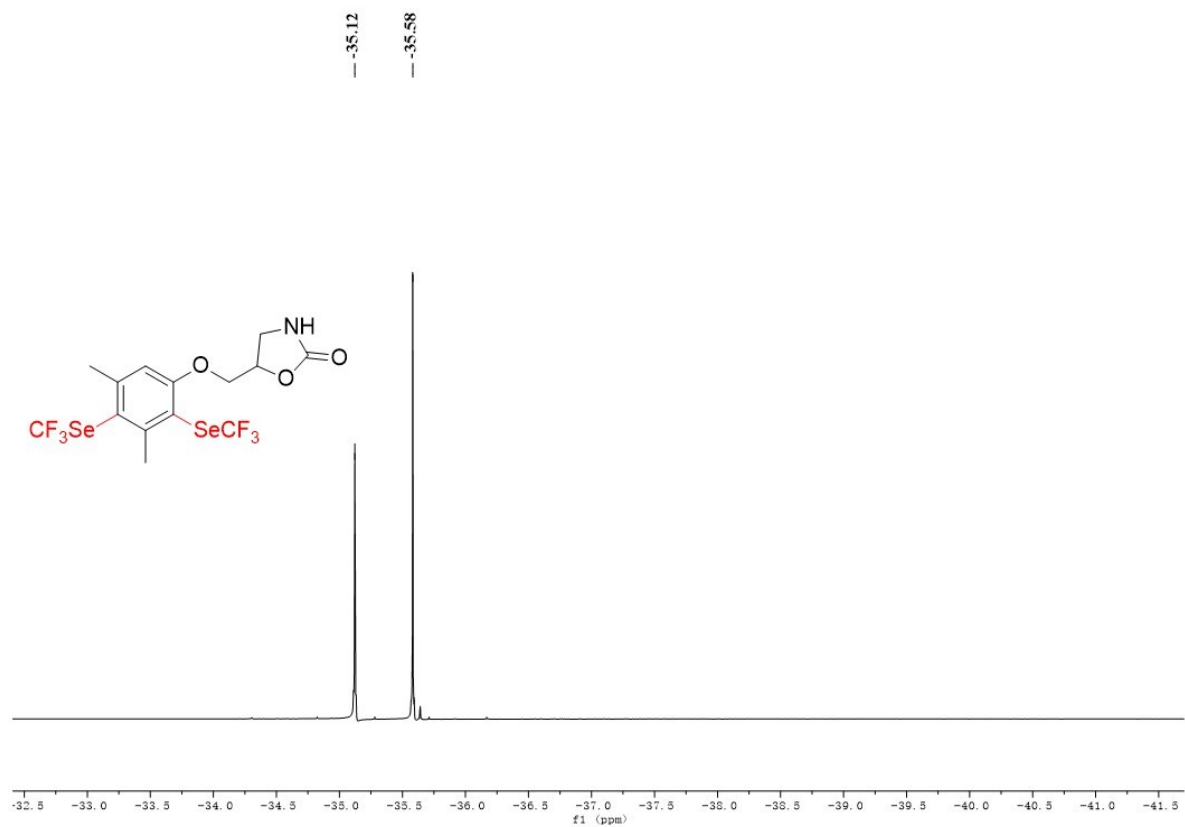

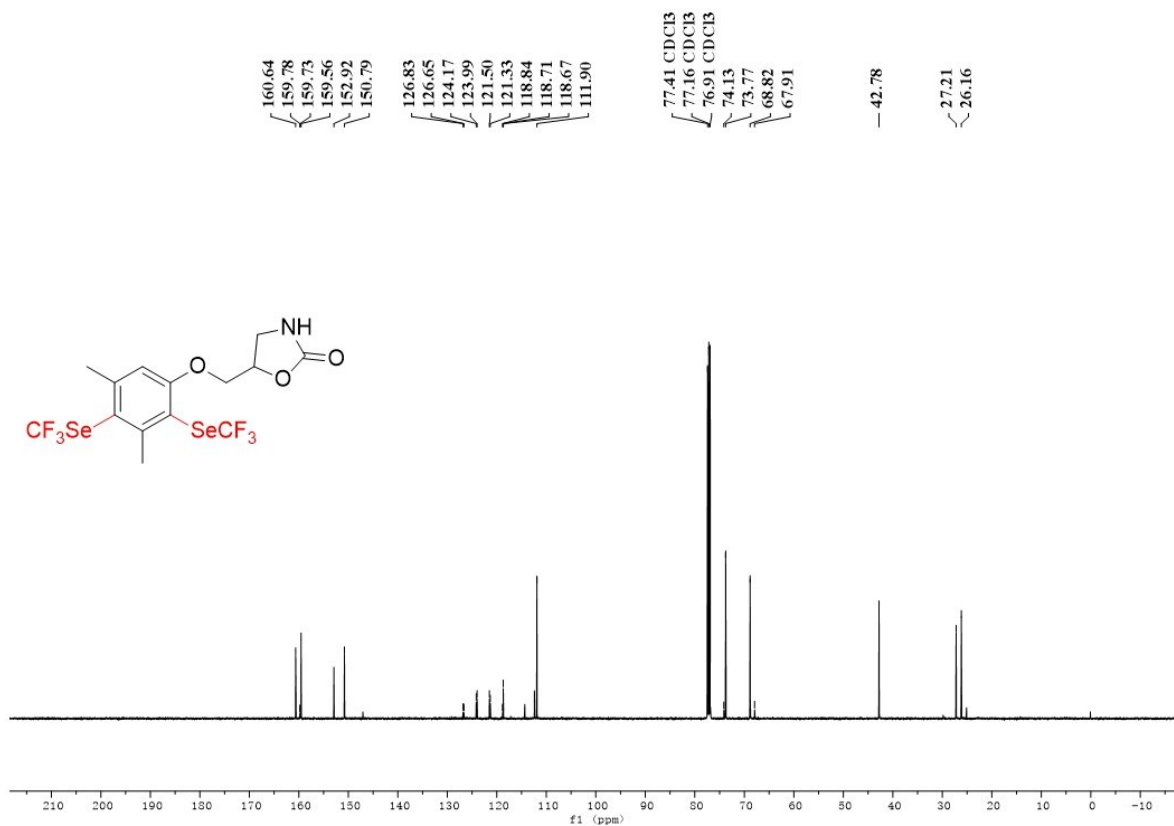



## 10) X-Ray Crystal data for complexes

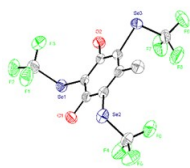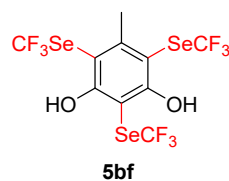

| Identification code                         | <b>5bf</b>                                                                   |
|---------------------------------------------|------------------------------------------------------------------------------|
| CCDC deposition number                      | 2363156                                                                      |
| Empirical formula                           | C <sub>10</sub> H <sub>5</sub> F <sub>9</sub> O <sub>2</sub> Se <sub>3</sub> |
| Formula weight                              | 565.02                                                                       |
| Temperature/K                               | 296(2)                                                                       |
| Crystal system                              | monoclinic                                                                   |
| Space group                                 | P <sub>21</sub> /m                                                           |
| a/Å                                         | 5.5035(7)                                                                    |
| b/Å                                         | 14.3112(18)                                                                  |
| c/Å                                         | 10.2822(14)                                                                  |
| α/°                                         | 90                                                                           |
| β/°                                         | 95.415(2)                                                                    |
| γ/°                                         | 90                                                                           |
| Volume/Å <sup>3</sup>                       | 806.23(18)                                                                   |
| Z                                           | 2                                                                            |
| ρ <sub>calc</sub> /cm <sup>3</sup>          | 2.327                                                                        |
| μ/mm <sup>-1</sup>                          | 6.940                                                                        |
| F(000)                                      | 528.0                                                                        |
| Crystal size/mm <sup>3</sup>                | 0.24 × 0.23 × 0.21                                                           |
| Radiation                                   | Mo Kα (λ = 0.71073)                                                          |
| 2θ range for data collection/°              | 4.892 to 49.994                                                              |
| Index ranges                                | -6 ≤ h ≤ 6, -13 ≤ k ≤ 17, -12 ≤ l ≤ 12                                       |
| Reflections collected                       | 4078                                                                         |
| Independent reflections                     | 1479 [R <sub>int</sub> = 0.0394, R <sub>sigma</sub> = 0.0526]                |
| Data/restraints/parameters                  | 1479/0/120                                                                   |
| Goodness-of-fit on F <sup>2</sup>           | 0.989                                                                        |
| Final R indexes [I >= 2σ (I)]               | R <sub>1</sub> = 0.0429, wR <sub>2</sub> = 0.1179                            |
| Final R indexes [all data]                  | R <sub>1</sub> = 0.0623, wR <sub>2</sub> = 0.1268                            |
| Largest diff. peak/hole / e Å <sup>-3</sup> | 0.70/-0.50                                                                   |

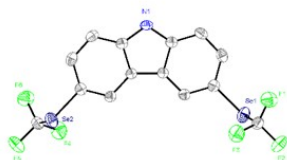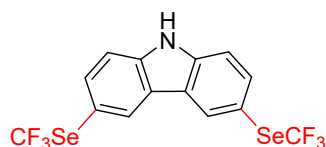

**5bi**

| Identification code                         | <b>5bi</b>                                                     |
|---------------------------------------------|----------------------------------------------------------------|
| CCDC deposition number                      | 2363182                                                        |
| Empirical formula                           | C <sub>14</sub> H <sub>7</sub> F <sub>6</sub> NSe <sub>2</sub> |
| Formula weight                              | 461.13                                                         |
| Temperature/K                               | 296(2)                                                         |
| Crystal system                              | monoclinic                                                     |
| Space group                                 | C <sub>2</sub> /c                                              |
| a/Å                                         | 13.120(3)                                                      |
| b/Å                                         | 15.873(4)                                                      |
| c/Å                                         | 7.9225(17)                                                     |
| α/°                                         | 90                                                             |
| β/°                                         | 113.703(3)                                                     |
| γ/°                                         | 90                                                             |
| Volume/Å <sup>3</sup>                       | 1510.7(6)                                                      |
| Z                                           | 4                                                              |
| ρ <sub>calc</sub> /cm <sup>3</sup>          | 2.027                                                          |
| μ/mm <sup>-1</sup>                          | 4.955                                                          |
| F(000)                                      | 880.0                                                          |
| Crystal size/mm <sup>3</sup>                | 0.24 × 0.22 × 0.2                                              |
| Radiation                                   | MoKα (λ = 0.71073)                                             |
| 2θ range for data collection/°              | 6.784 to 49.998                                                |
| Index ranges                                | -15 ≤ h ≤ 14, -18 ≤ k ≤ 18, -9 ≤ l ≤ 9                         |
| Reflections collected                       | 3795                                                           |
| Independent reflections                     | 1335 [R <sub>int</sub> = 0.0200, R <sub>sigma</sub> = 0.0225]  |
| Goodness-of-fit on F <sup>2</sup>           | 1.054                                                          |
| Final R indexes [I ≥ 2σ (I)]                | R <sub>1</sub> = 0.0258, wR <sub>2</sub> = 0.0699              |
| Final R indexes [all data]                  | R <sub>1</sub> = 0.0326, wR <sub>2</sub> = 0.0727              |
| Largest diff. peak/hole / e Å <sup>-3</sup> | 0.35/-0.41                                                     |

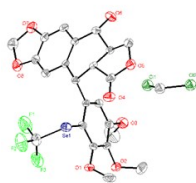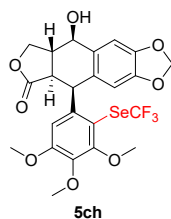

| Identification code                         | <b>5ch</b>                                                                       |
|---------------------------------------------|----------------------------------------------------------------------------------|
| CCDC deposition number                      | 2363183                                                                          |
| Empirical formula                           | C <sub>24</sub> H <sub>23</sub> C <sub>12</sub> F <sub>3</sub> O <sub>8</sub> Se |
| Formula weight                              | 646.28                                                                           |
| Temperature/K                               | 296(2)                                                                           |
| Crystal system                              | orthorhombic                                                                     |
| Space group                                 | P <sub>2</sub> /12121                                                            |
| a/Å                                         | 11.7699(17)                                                                      |
| b/Å                                         | 13.869(2)                                                                        |
| c/Å                                         | 16.099(2)                                                                        |
| α/°                                         | 90                                                                               |
| β/°                                         | 90                                                                               |
| γ/°                                         | 90                                                                               |
| Volume/Å <sup>3</sup>                       | 2627.9(7)                                                                        |
| Z                                           | 4                                                                                |
| ρ <sub>calc</sub> /cm <sup>3</sup>          | 1.633                                                                            |
| μ/mm <sup>-1</sup>                          | 1.700                                                                            |
| F(000)                                      | 1304.0                                                                           |
| Crystal size/mm <sup>3</sup>                | 0.24 × 0.21 × 0.19                                                               |
| Radiation                                   | MoKα (λ = 0.71073)                                                               |
| 2θ range for data collection/°              | 5.852 to 49.998                                                                  |
| Index ranges                                | -13 ≤ h ≤ 13, -15 ≤ k ≤ 16, -13 ≤ l ≤ 19                                         |
| Reflections collected                       | 13444                                                                            |
| Independent reflections                     | 4601 [R <sub>int</sub> = 0.0418, R <sub>sigma</sub> = 0.0734]                    |
| Data/restraints/parameters                  | 4601/0/347                                                                       |
| Goodness-of-fit on F <sup>2</sup>           | 0.905                                                                            |
| Final R indexes [I ≥ 2σ (I)]                | R <sub>1</sub> = 0.0405, wR <sub>2</sub> = 0.0921                                |
| Final R indexes [all data]                  | R <sub>1</sub> = 0.0613, wR <sub>2</sub> = 0.0998                                |
| Largest diff. peak/hole / e Å <sup>-3</sup> | 0.46/-0.42                                                                       |
| Flack parameter                             | -0.001(7)                                                                        |

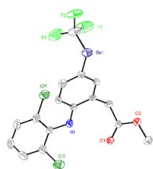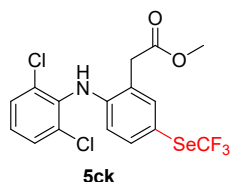

|                                             |                                                                                   |
|---------------------------------------------|-----------------------------------------------------------------------------------|
| Identification code                         | <b>5ck</b>                                                                        |
| CCDC deposition number                      | 2363185                                                                           |
| Empirical formula                           | C <sub>16</sub> H <sub>12</sub> Cl <sub>2</sub> F <sub>3</sub> NO <sub>2</sub> Se |
| Formula weight                              | 457.13                                                                            |
| Temperature/K                               | 296(2)                                                                            |
| Crystal system                              | monoclinic                                                                        |
| Space group                                 | C <sub>2</sub> /c                                                                 |
| a/Å                                         | 24.132(11)                                                                        |
| b/Å                                         | 11.467(4)                                                                         |
| c/Å                                         | 16.411(7)                                                                         |
| α/°                                         | 90                                                                                |
| β/°                                         | 125.672(12)                                                                       |
| γ/°                                         | 90                                                                                |
| Volume/Å <sup>3</sup>                       | 3689(3)                                                                           |
| Z                                           | 8                                                                                 |
| ρ <sub>calc</sub> /cm <sup>3</sup>          | 1.646                                                                             |
| μ/mm <sup>-1</sup>                          | 2.363                                                                             |
| F (000)                                     | 1808.0                                                                            |
| Crystal size/mm <sup>3</sup>                | 0.23 × 0.22 × 0.18                                                                |
| Radiation                                   | MoKα (λ = 0.71073)                                                                |
| 2θ range for data collection/°              | 6.284 to 49.99                                                                    |
| Index ranges                                | -28 ≤ h ≤ 22, -13 ≤ k ≤ 13, -17 ≤ l ≤ 19                                          |
| Reflections collected                       | 9015                                                                              |
| Independent reflections                     | 3232 [R <sub>int</sub> = 0.0933, R <sub>sigma</sub> = 0.0964]                     |
| Data/restraints/parameters                  | 3232/0/228                                                                        |
| Goodness-of-fit on F <sub>2</sub>           | 0.957                                                                             |
| Final R indexes [I ≥ 2σ (I)]                | R <sub>1</sub> = 0.0581, wR <sub>2</sub> = 0.1463                                 |
| Final R indexes [all data]                  | R <sub>1</sub> = 0.0978, wR <sub>2</sub> = 0.1623                                 |
| Largest diff. peak/hole / e Å <sup>-3</sup> | 0.55/-1.17                                                                        |
